# Supplementary material for: OsLMP1, Encoding a Deubiquitinase, Regulates the Immune Response in Rice
Source: Front Plant Sci. 2022 Jan 18;12:814465. doi: 10.3389/fpls.2021.814465 (PMC8805587; doi:10.3389/fpls.2021.814465)
Supplement: Supplementary Figure 1 — Enhanced resistance in the lmp1-1 mutant to Magnaporthe oryzae and Xanthomonas oryzae pv. oryzae isolates. [file Data_Sheet_1.docx]

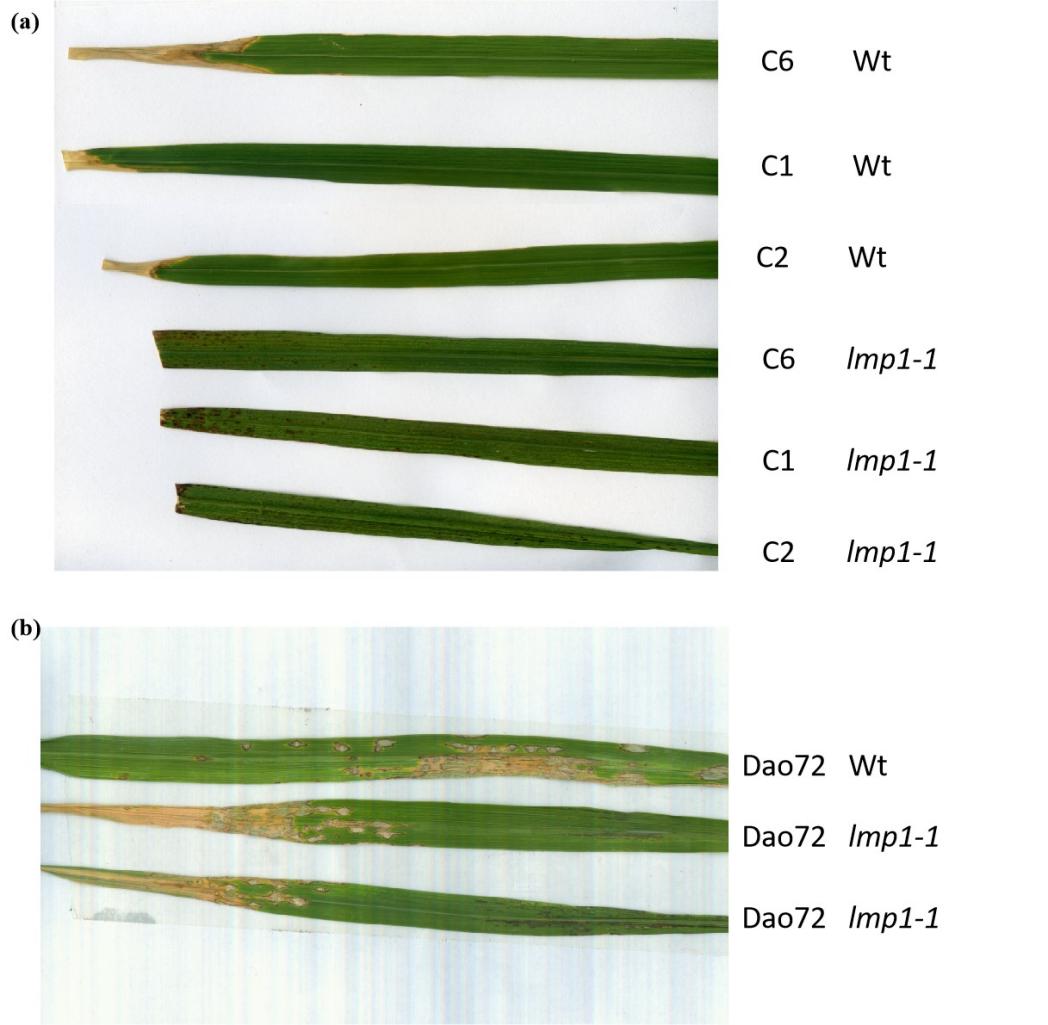


**Fig. S1.** Enhanced resistance in the *lmp1-1* mutant to Magnaporthe oryzae and Xanthomonas oryzae pv. oryzae isolates. (a) Reactions to three Xanthomonas oryzae pv. oryzae isolates (C1,C2,C6). The variety Nipponbare (wt) was used as a control. (b) Reactions to one Magnaporthe oryzae isolate (Dao72). The result showed that some Magnaporthe oryzae and Xanthomonas oryzae pv. oryzae physiologic races showed more enhanced resistance in lmp1-1 than control (wild type) .


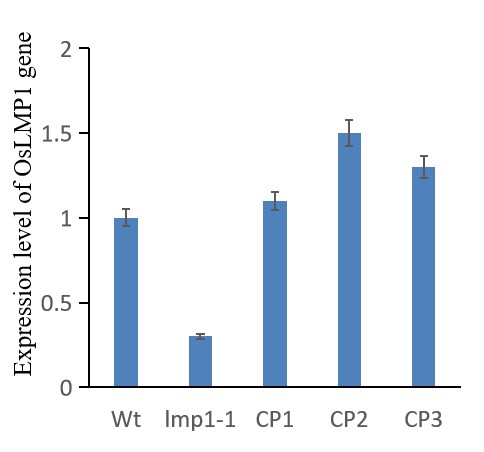


**Fig. S2. The expression level of OsLMP1 in the complementation lines (CP1-CP3) was restored to the expression level in the wild-type line.**


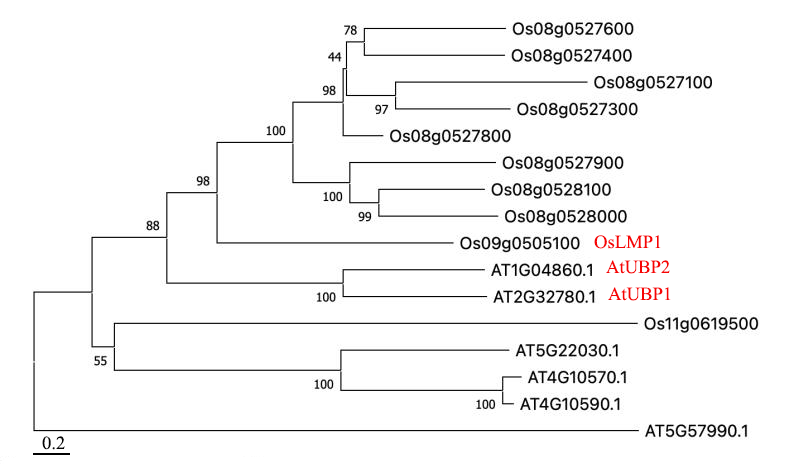


**Fig. S3. Phylogenetic tree showing the predicted relationships between OsLMP1 and homologous proteins in rice and *Arabidopsis*.**

Full-length amino acid sequences of each protein were aligned using CLUSTALW and revised manually. The tree was constructed using the neighbor-joining method. Neighbor-joining phylogenetic tree analysis based on full-length protein sequences from the OsLMP1 homologous members. The bar represents genetic distance in the phylogenetic tree.


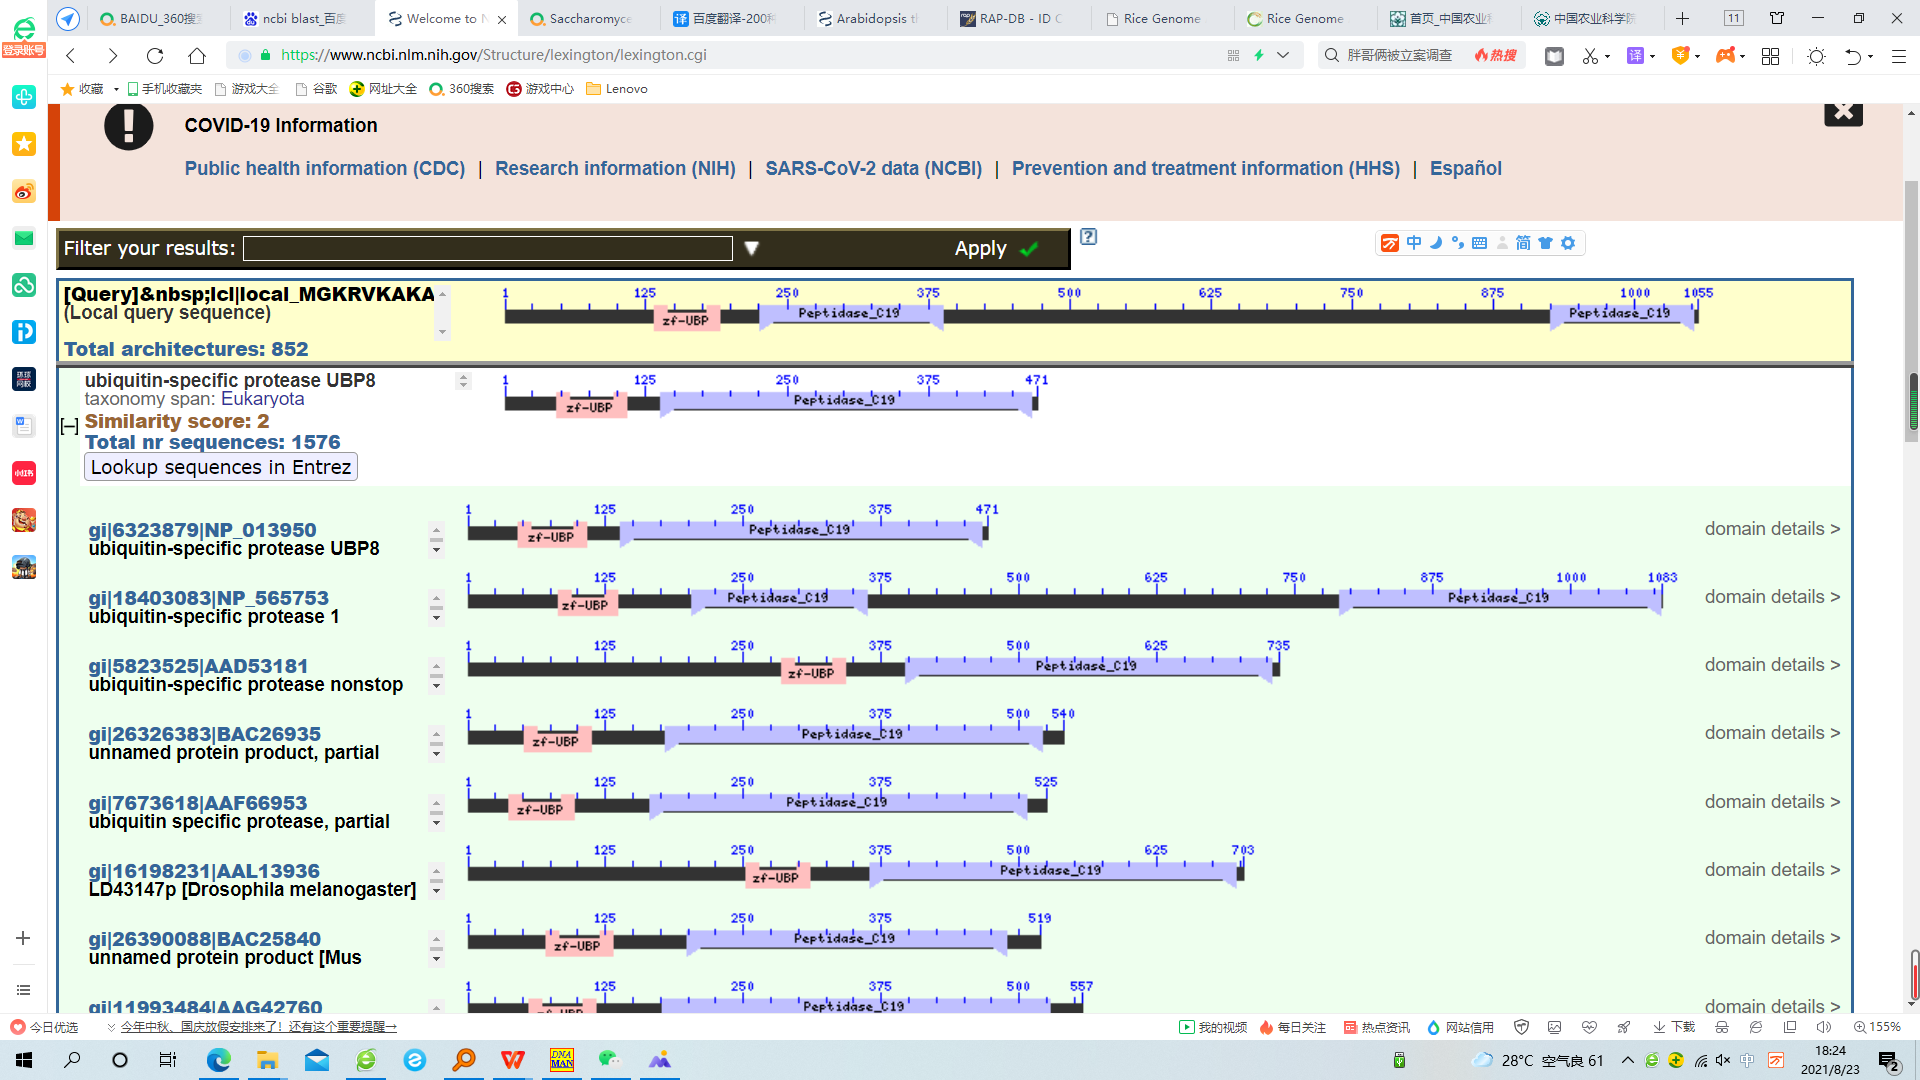


**Fig. S4. Similar conserved domain architecture (CDART) analysis with NCBI showed that the conserved domain in OsLMP1 exhibits the highest homology with the ubiquitin-specific protease UBP8 (*Saccharomyces cerevisiae*).**

**
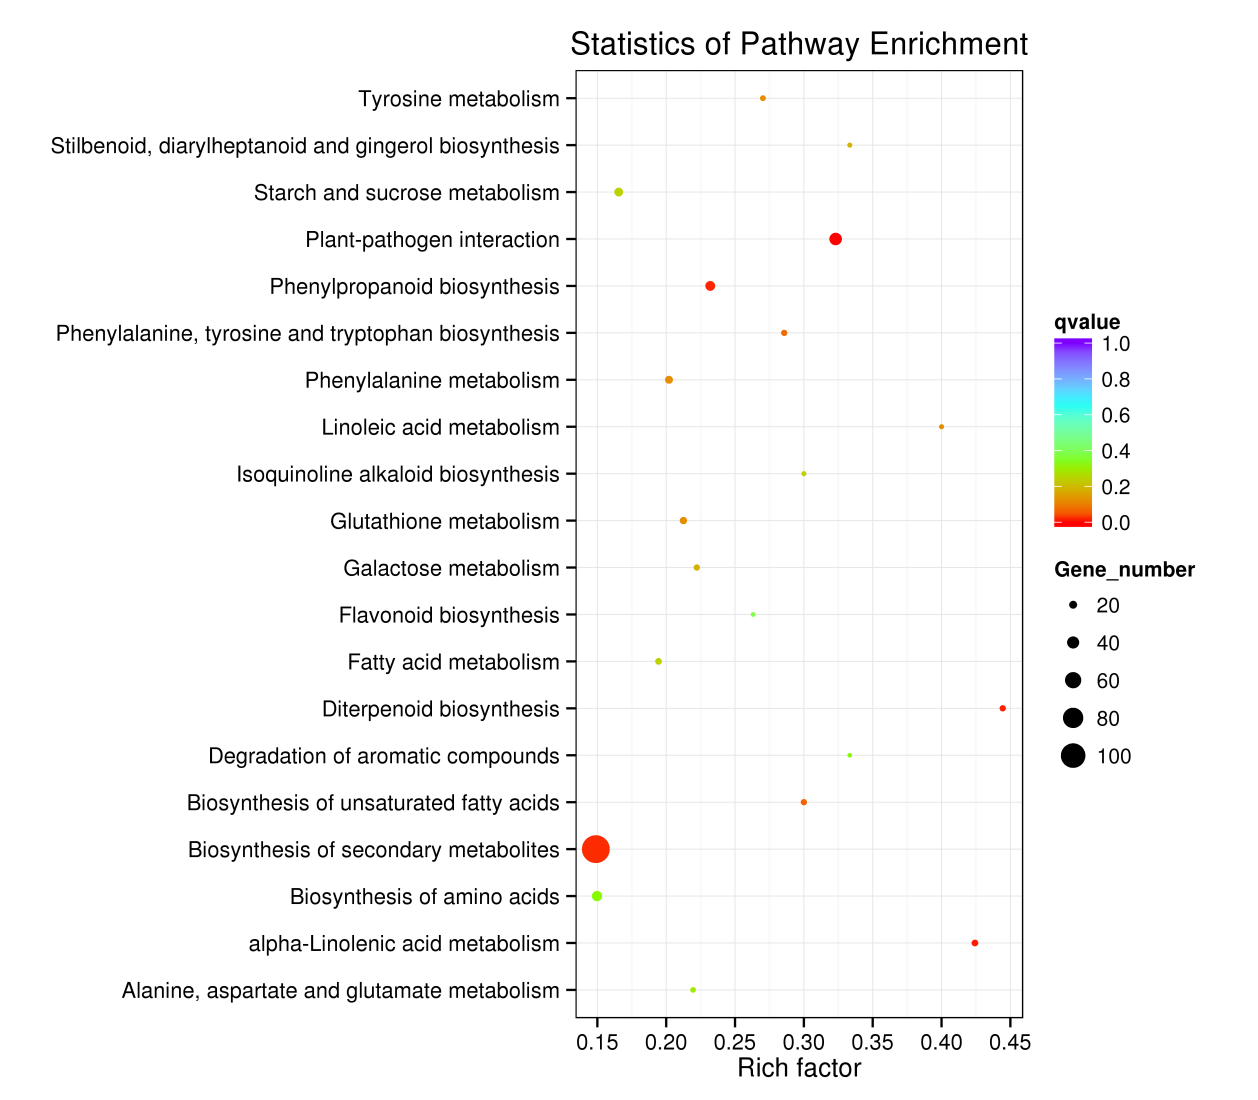
**

**Fig. S5. Up-regulated genes KEGG enrichment analysis of the *lmp1-1* and wt lines.** The X-axis indicates the enrichment ratio (the ratio of the number of genes annotated to an entry in the selected up-regulated gene set to the total number of genes annotated to the entry in the species). The Y-axis indicates the KEGG pathway, and the size of the bubble indicates the number of genes. The color represents the enriched Q-value; the darker the color is, the smaller the Q value is.

**
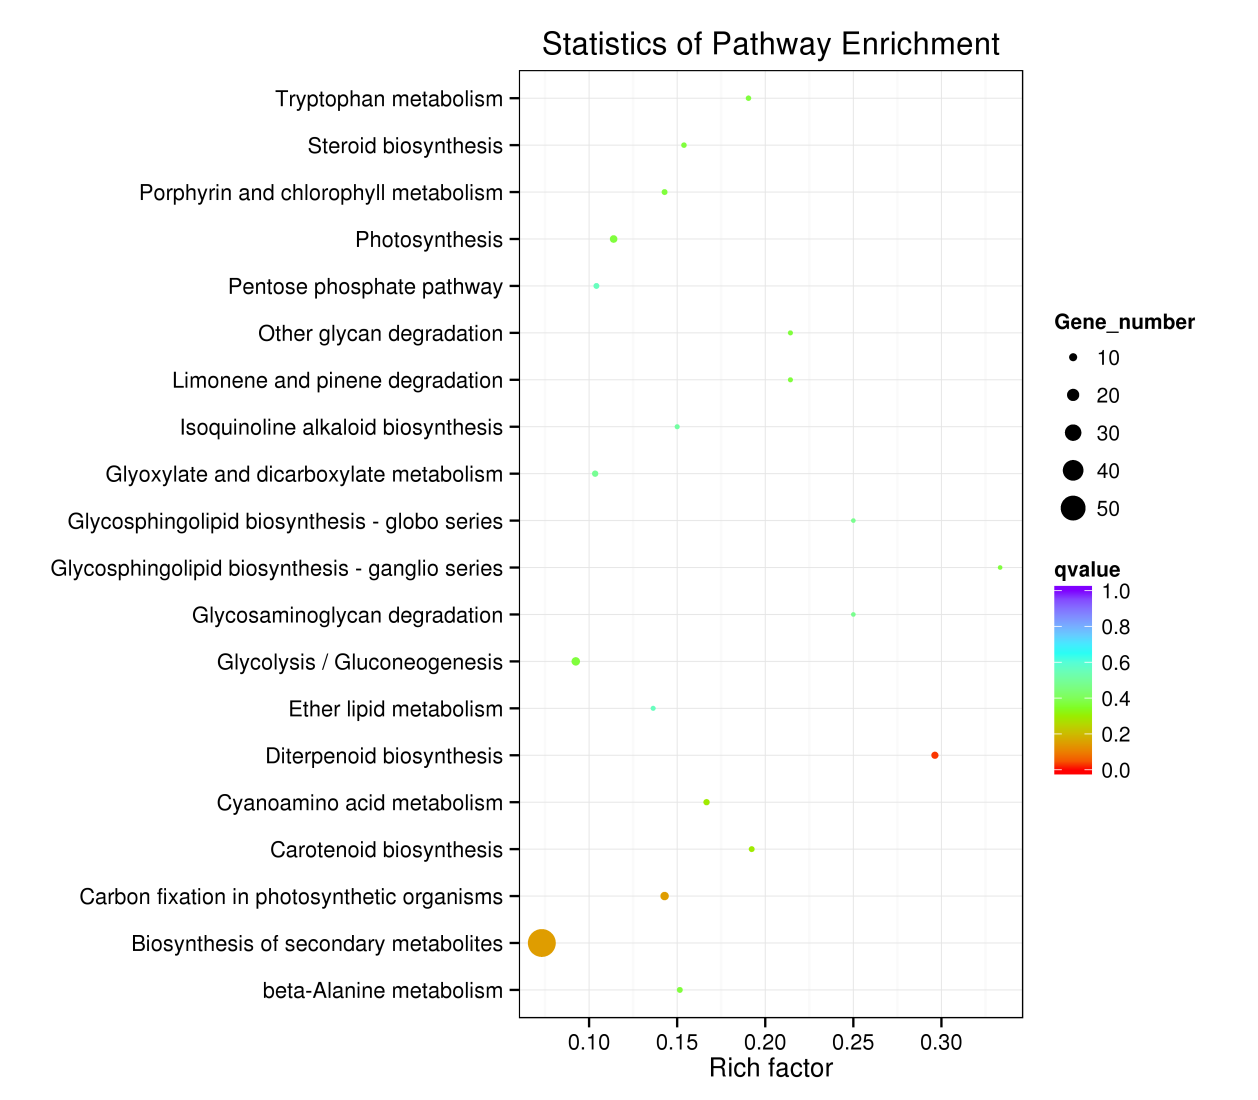
**

**Fig. S6. Down-regulated genes KEGG enrichment analysis of the *lmp1-1* and wt lines.** The X-axis indicates the enrichment ratio (the ratio of the number of genes annotated to an entry in the selected down-regulated gene set to the total number of genes annotated to the entry in the species). The Y-axis indicates the KEGG pathway, and the size of the bubble indicates the number of genes. The color represents the enriched Q-value; the darker the color is, the smaller the Q value is.

**
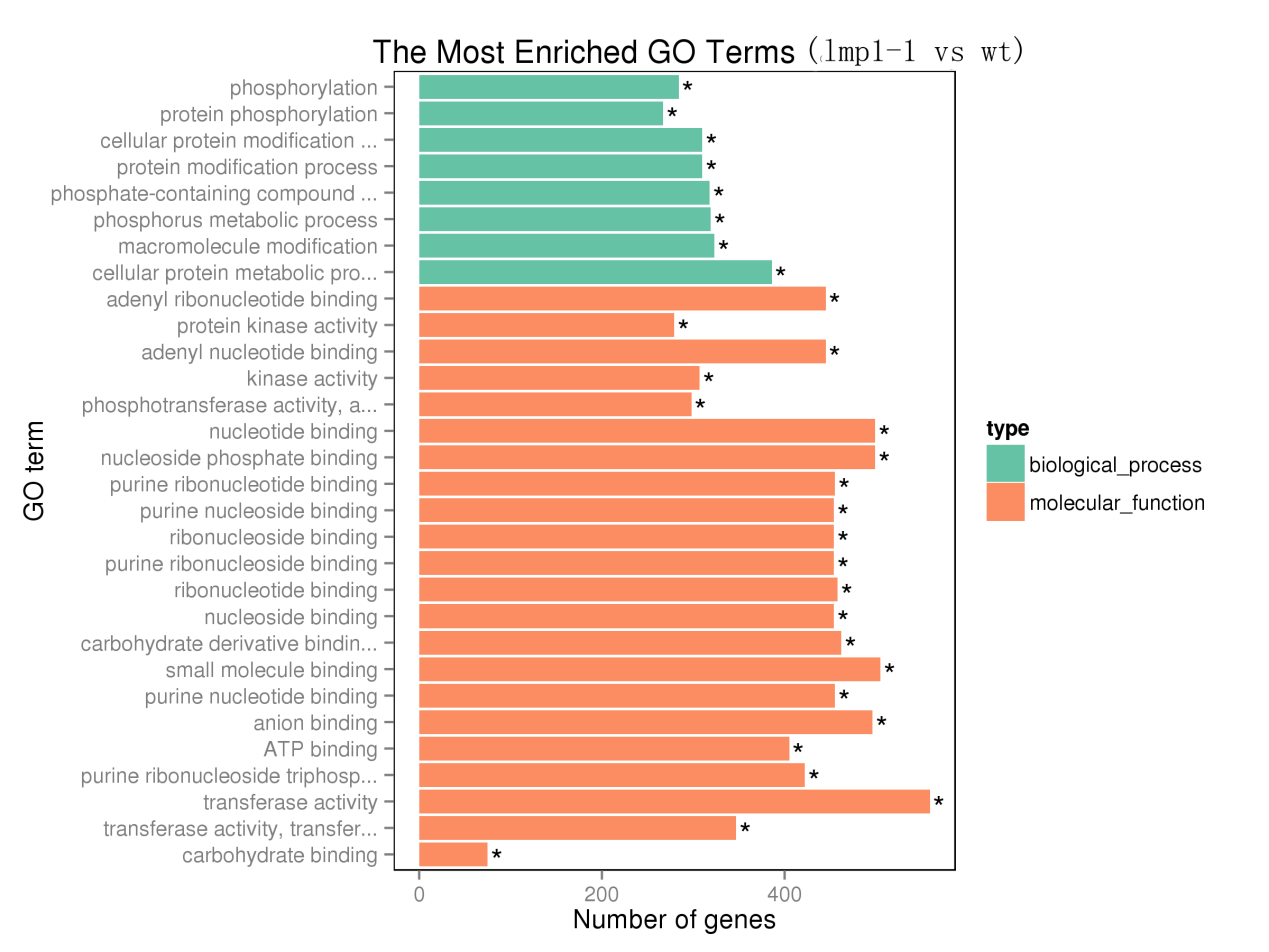
**

**Fig. S7. GO annotation of the up-regulated DEGs from the leaves of the *lmp1-1* and wt lines at the later tiller stage.**

**
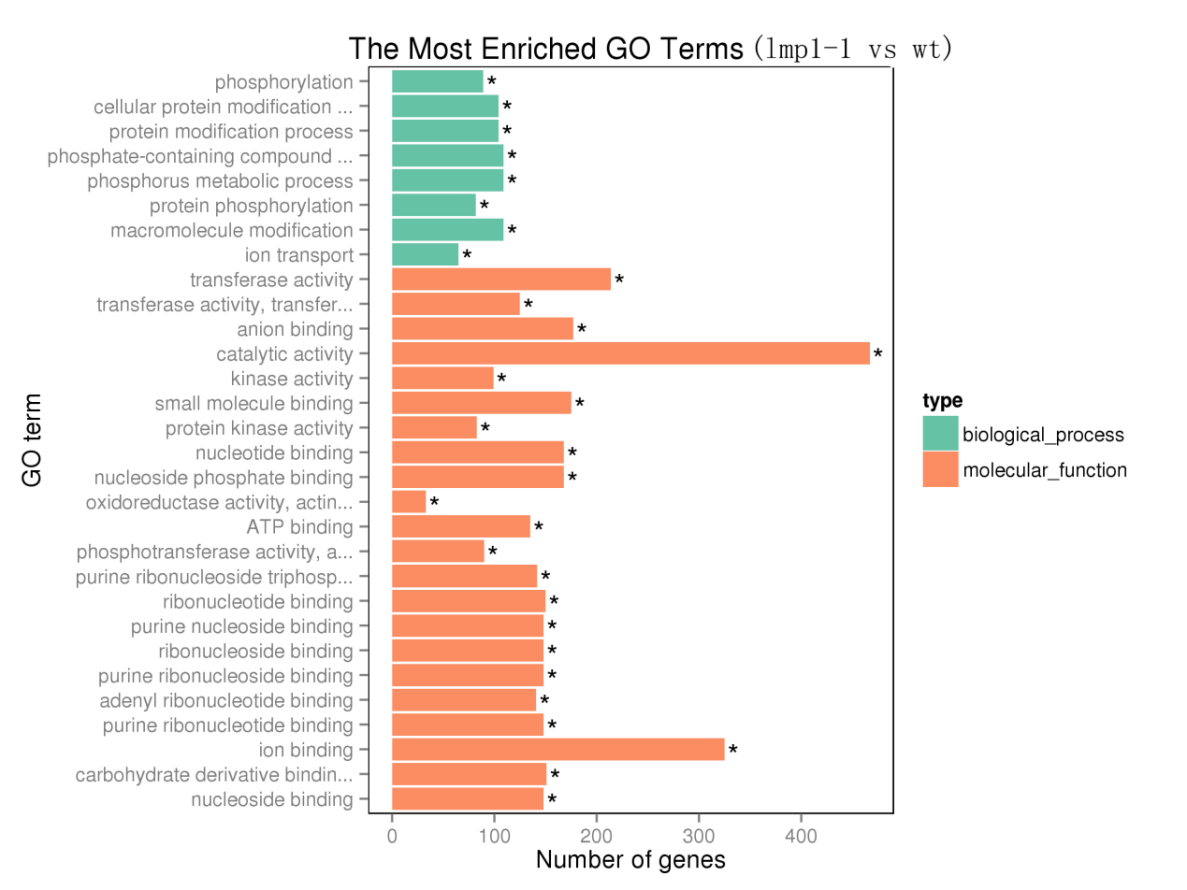
**

**Fig. S8. GO annotation of the down-regulated DEGs from the leaves of the lmp1-1 and wt lines at the later tiller stage.**

**Fig. S9. The expression levels of SA synthesis genes, including OsPAL1-7 and OsICS1, were verified by qRT-PCR (a-h).**


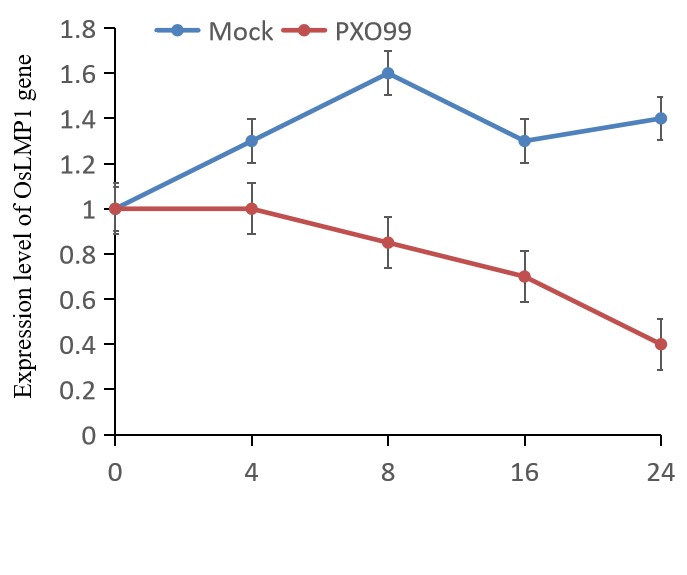


**Fig. S10. Time course of OsLMP1 expression in the later tiller stage in the seedlings of wt plants treated with rice bacterial blight (PXO99) using the leaf cutting method.**

Take samples (the sampling site is 2cm away from the incision) every 4 hours. The result showed that the expression of OsLMP1 after PXO99 treatment decreased significantly. Mock was selected as control (untreated)（n=3）.


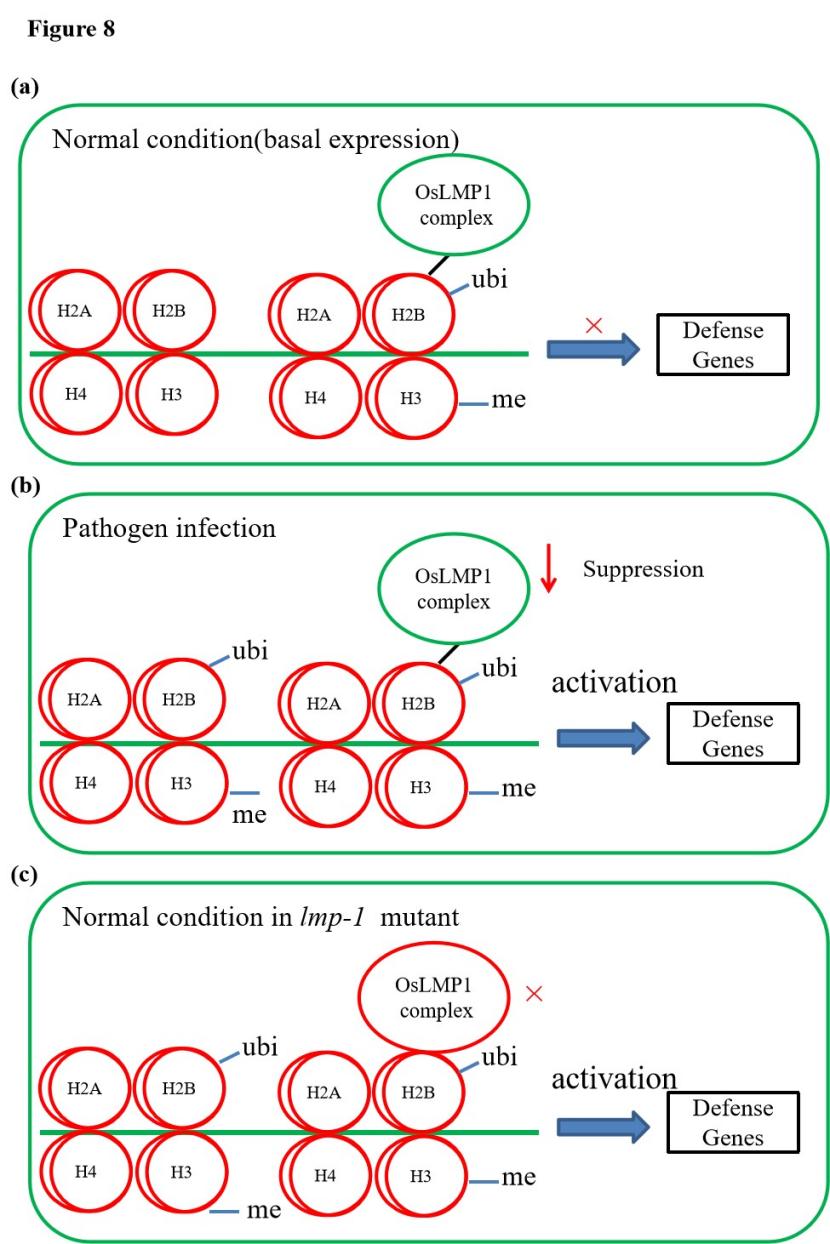


**Fig. S11. A model of the role of OsLMP1 in the defense response.**

In this model, the OsLMP1 complex maintains its deubiquitination activity under normal growth conditions in the wt plants, and the level of H2B ubiquitination is maintained at the background level or lower, thus inhibiting the expression of disease resistance-related genes. In *lmp1-1*, the deubiquitination activity of the OsLMP1 complex is decreased, and the ubiquitination and methylation of H2B are increased, which activates the expression of disease resistance-related genes. Under pathogen infection conditions, unknown factors reduce *OsLMP1* complex activity and increase H2B ubiquitination levels, thus activating the expression of disease resistance-related genes and improving plant resistance.
