# Supplementary material for: OsLMP1, Encoding a Deubiquitinase, Regulates the Immune Response in Rice
Source: Front Plant Sci. 2022 Jan 18;12:814465. doi: 10.3389/fpls.2021.814465 (PMC8805587; doi:10.3389/fpls.2021.814465)
Supplement: Supplementary Table 1 — Differential analysis of the lmp1-1 vs. wt lines. [file Table_1.xlsx]

## Sheet: Up
Gene_id	readcount_T138	readcount_Nip	log2FoldChange	pval	padj	Gene Description
LOC_Os01g01620	10397.6	1955.89	2.4103	9.75e-08	4.97e-06	kinase, pfkB family, putative, expressed
LOC_Os01g01650	54.9558	1.25781	5.4493	1.94e-10	1.83e-08	isoflavone reductase homolog IRL, putative, expressed
LOC_Os01g01930	33.6862	7.36657	2.1931	0.0021798	0.024228	expressed protein
LOC_Os01g02680	58.6098	0.308101	7.5716	4.93e-13	8.05e-11	protein kinase domain containing protein, expressed
LOC_Os01g02690	109.089	33.6289	1.6977	0.0013477	0.016498	resistance-related receptor-like kinase, putative, expressed
LOC_Os01g02880	3378.1	709.814	2.2507	5.76e-07	2.36e-05	fructose-bisphospate aldolase isozyme, putative, expressed
LOC_Os01g02890	425.534	15.02	4.8243	5.31e-18	2.13e-15	phosphatidylserine synthase, putative, expressed
LOC_Os01g03030	3344.84	514.731	2.7	2.48e-07	1.12e-05	alanyl-tRNA synthetase, putative, expressed
LOC_Os01g03100	215.219	50.7287	2.0849	0.00049795	0.0074537	protein binding protein, putative, expressed
LOC_Os01g03130	3695.73	9.16777	8.6551	2.59e-15	6.58e-13	expressed protein
LOC_Os01g03390	3720.14	108.523	5.0993	7.38e-05	0.0015206	BBTI7 - Bowman-Birk type bran trypsin inhibitor precursor, expressed
LOC_Os01g03690	3995.57	1415.57	1.497	0.00069298	0.0097025	TKL_IRAK_DUF26-lg.1 - DUF26 kinases have homology to DUF26 containing loci, expressed
LOC_Os01g03710	340.364	43.1835	2.9785	1.02e-05	0.00028196	mannose-6-phosphate isomerase, putative, expressed
LOC_Os01g03720	51.8107	5.71855	3.1795	0.00015036	0.0028006	MYB family transcription factor, putative, expressed
LOC_Os01g03914	1336.83	467.231	1.5166	0.00055753	0.0081409	cation efflux family protein, putative, expressed
LOC_Os01g04280	20377.1	660.942	4.9463	3.41e-22	2.98e-19	calmodulin binding protein, putative, expressed
LOC_Os01g04300	40.594	8.69205	2.2235	0.0012737	0.015737	glycosyl hydrolase family 10 protein, putative, expressed
LOC_Os01g04330	494.617	116.611	2.0846	1.16e-05	0.00031223	OsCML16 - Calmodulin-related calcium sensor protein, expressed
LOC_Os01g04350	10836.7	3662.33	1.5651	0.0015043	0.018032	hsp20/alpha crystallin family protein, putative, expressed
LOC_Os01g04360	46.1639	3.52542	3.7109	9.23e-07	3.58e-05	hsp20/alpha crystallin family protein, putative, expressed
LOC_Os01g04370	36.8542	8.87999	2.0532	0.0020806	0.023336	hsp20/alpha crystallin family protein, putative, expressed
LOC_Os01g04409	1703.39	672.075	1.3417	0.0027123	0.028591	OsWAK1 - OsWAK receptor-like cytoplasmic kinase OsWAK-RLCK, expressed
LOC_Os01g04430	137.939	46.6227	1.5649	0.0016535	0.019461	expressed protein
LOC_Os01g04440	129.192	4.32611	4.9003	8.56e-14	1.54e-11	expressed protein
LOC_Os01g04450	2044.77	578.03	1.8227	4.92e-05	0.0010715	OsWAK2 - OsWAK receptor-like cytoplasmic kinase OsWAK-RLCK, expressed
LOC_Os01g04520	78.4874	23.4709	1.7416	0.0027844	0.029171	Ser/Thr protein kinase, putative, expressed
LOC_Os01g04530	38.635	2.62312	3.8806	1.84e-06	6.41e-05	expressed protein
LOC_Os01g04550	548.303	170.491	1.6853	0.00028245	0.0046872	expressed protein
LOC_Os01g04560	12.8515	0.320802	5.3241	0.00045321	0.0069349	expressed protein
LOC_Os01g04580	1958.36	295.557	2.7281	2.84e-06	9.44e-05	Ser/Thr protein kinase, putative, expressed
LOC_Os01g04650	13436.2	5393.7	1.3168	0.0026728	0.028285	PB1 domain containing protein, expressed
LOC_Os01g05064	1917.93	138.391	3.7927	9.2e-06	0.00025951	expressed protein
LOC_Os01g05120	170.897	3.49662	5.611	2.03e-07	9.46e-06	ubiquitin fusion degradation protein, putative, expressed
LOC_Os01g05170	60.0229	6.03596	3.3139	0.00051721	0.0076703	expressed protein
LOC_Os01g05370	31.6231	0	Inf	2.66e-09	1.96e-07	retrotransposon protein, putative, unclassified, expressed
LOC_Os01g05380	72.6092	2.82031	4.6862	1.44e-07	7.04e-06	expressed protein
LOC_Os01g05790	3993.47	1564.59	1.3519	0.0027187	0.028633	SLT1 protein, putative, expressed
LOC_Os01g06460	3590.26	814.342	2.1404	2.81e-06	9.34e-05	uncharacterized Cys-rich domain containing protein, putative, expressed
LOC_Os01g06510	956.328	173.506	2.4625	4.03e-05	0.00090748	arginyl-tRNA synthetase, putative, expressed
LOC_Os01g06590	2207.89	857.116	1.3651	0.0023457	0.025685	zinc finger, C3HC4 type domain containing protein, expressed
LOC_Os01g06640	1575.29	128.766	3.6128	1.3e-05	0.00034473	basic helix-loop-helix, putative, expressed
LOC_Os01g06660	2643.43	330.204	3.001	1.15e-07	5.77e-06	thiamine pyrophosphate enzyme, C-terminal TPP binding domain containing protein, expressed
LOC_Os01g06670	79.7026	4.00531	4.3146	5.66e-10	4.91e-08	hcr2-5D, putative, expressed
LOC_Os01g06890	252.598	59.6627	2.0819	2.7e-05	0.0006441	leucine-rich repeat family protein, putative, expressed
LOC_Os01g07120	808.04	221.29	1.8685	4.7e-05	0.0010304	AP2 domain containing protein, expressed
LOC_Os01g07360	62.0895	1.86131	5.06	4.17e-05	0.00093307	KIP1, putative, expressed
LOC_Os01g07530	1395.8	320.952	2.1207	4.57e-05	0.0010049	uncharacterized glycosyltransferase, putative, expressed
LOC_Os01g08020	6037.18	455.262	3.7291	5.16e-14	9.86e-12	boron transporter protein, putative, expressed
LOC_Os01g08090	3254.49	384.637	3.0809	8.42e-11	8.6e-09	flavonol-3-O-glycoside-7-O-glucosyltransferase 1, putative, expressed
LOC_Os01g08340	405.188	145.774	1.4749	0.0014382	0.017397	zinc finger family protein, putative, expressed
LOC_Os01g08760	558.469	156.269	1.8374	7.63e-05	0.0015627	choline/ethanolamine kinase, putative, expressed
LOC_Os01g08780	1811.58	97.0019	4.2231	0.0007791	0.010637	endonuclease/exonuclease/phosphatase family domain containing protein, expressed
LOC_Os01g08810	286.891	48.5924	2.5617	0.0038861	0.037974	cytochrome P450, putative, expressed
LOC_Os01g08840	2653.81	28.7805	6.5268	1.93e-06	6.69e-05	expressed protein
LOC_Os01g09080	1010.44	11.2094	6.4941	1.32e-05	0.00034935	WRKY107, expressed
LOC_Os01g09140	88.5335	20.0233	2.1445	0.00016191	0.002974	expressed protein
LOC_Os01g09220	1463.26	175.161	3.0624	1.81e-10	1.73e-08	transposon protein, putative, CACTA, En/Spm sub-class, expressed
LOC_Os01g09570	4401.51	1795.45	1.2937	0.0040032	0.038863	6-phosphofructokinase, putative, expressed
LOC_Os01g09590	5121.66	1009.96	2.3423	6.26e-05	0.0013196	myb-like DNA-binding domain containing protein, putative, expressed
LOC_Os01g09770	1887.82	630.6	1.5819	0.00044883	0.0068931	expressed protein
LOC_Os01g09870	60.7806	17.3257	1.8107	0.0030743	0.03156	expressed protein
LOC_Os01g09990	2161.45	13.7368	7.2978	3.08e-08	1.77e-06	helix-loop-helix DNA-binding domain containing protein, expressed
LOC_Os01g10110	1506.85	31.9191	5.561	0.00023967	0.0041108	cytokinin dehydrogenase precursor, putative, expressed
LOC_Os01g10130	255.235	70.1054	1.8642	0.00010288	0.0020295	RNA-dependent RNA polymerase, putative, expressed
LOC_Os01g10250	1278.54	250.623	2.3509	1.69e-06	5.97e-05	hydrolase, alpha/beta fold family domain containing protein, expressed
LOC_Os01g10440	8799.68	353.73	4.6367	0.00017162	0.0031156	xylosyltransferase, putative, expressed
LOC_Os01g10590	267.692	67.2826	1.9923	3.51e-05	0.00081093	osFTL8 FT-Like8 homologous to Flowering Locus T gene; contains Pfam profile PF01161: Phosphatidylethanolamine-binding protein, expressed
LOC_Os01g11150	13.8881	0.971707	3.8372	0.0016925	0.01983	gibberellin 2-beta-dioxygenase, putative, expressed
LOC_Os01g11160	14813.1	3643.87	2.0233	8.99e-06	0.00025445	amino acid permease family protein, putative, expressed
LOC_Os01g11170	183.84	28.1753	2.7059	5.46e-05	0.0011734	expressed protein
LOC_Os01g11220	22.5025	1.2451	4.1757	5.33e-05	0.0011508	hydrolase, acting on carbon-nitrogen, putative, expressed
LOC_Os01g11340	574.574	199.371	1.527	0.0021095	0.023588	cytochrome P450, putative, expressed
LOC_Os01g11520	3673.38	260.19	3.8195	8.31e-07	3.26e-05	RING-H2 finger protein, putative, expressed
LOC_Os01g11650	5355.41	1268.65	2.0777	0.000309	0.005055	GDSL-like lipase/acylhydrolase, putative, expressed
LOC_Os01g11910	1903.09	306.193	2.6358	1.09e-08	7.11e-07	basic helix-loop-helix, putative, expressed
LOC_Os01g12210	441.795	178.884	1.3044	0.0045854	0.043322	aluminum-activated malate transporter, putative, expressed
LOC_Os01g12420	16.5059	0.355505	5.537	0.0050539	0.046571	receptor-like protein kinase, putative, expressed
LOC_Os01g12520	322.171	103.952	1.6319	0.0034241	0.034304	mitochondrial carrier protein, putative, expressed
LOC_Os01g12790	76.5682	11.1569	2.7788	1.07e-05	0.00029298	receptor protein kinase, putative, expressed
LOC_Os01g13610	5000.26	10.8514	8.848	1.85e-09	1.4e-07	isoflavone reductase homolog IRL, putative, expressed
LOC_Os01g14080	358.257	62.4358	2.5205	2.24e-07	1.03e-05	lipase class 3 family protein, putative, expressed
LOC_Os01g14440	12528.3	4079.1	1.6189	0.0023803	0.025964	WRKY1, expressed
LOC_Os01g15000	1530.42	592.414	1.3692	0.0019777	0.022343	lipase, putative, expressed
LOC_Os01g15340	52.6625	3.52034	3.903	0.00052772	0.0078067	flowering promoting factor-like 1, putative, expressed
LOC_Os01g15640	6133.51	1585	1.9522	1.47e-05	0.00038413	no apical meristem protein, putative, expressed
LOC_Os01g16190	3736.02	1570.25	1.2505	0.0050053	0.046276	26S proteasome non-ATPase regulatory subunit 14, putative, expressed
LOC_Os01g16220	345.85	96.846	1.8364	0.00010388	0.0020459	Sad1 / UNC-like C-terminal domain containing protein, putative, expressed
LOC_Os01g16230	170.973	7.28446	4.5528	3.69e-07	1.59e-05	TKL_IRAK_CR4L.2 - The CR4L subfamily has homology with Crinkly4, expressed
LOC_Os01g16260	689.232	281.587	1.2914	0.0045471	0.043056	major facilitator superfamily antiporter, putative, expressed
LOC_Os01g16310	572.129	52.3935	3.4489	0.0022084	0.024477	glycosyl hydrolase, family 31, putative, expressed
LOC_Os01g16930	861.089	260.968	1.7223	0.00016433	0.0030075	presenilin, putative, expressed
LOC_Os01g16960	2197.69	648.892	1.7599	9.23e-05	0.0018436	pyruvate kinase, putative, expressed
LOC_Os01g17330	238.512	2.79831	6.4134	0.00029606	0.0048779	eukaryotic translation initiation factor 6, putative, expressed
LOC_Os01g18220	434.65	83.6262	2.3778	8.67e-07	3.39e-05	expressed protein
LOC_Os01g18584	27348.7	2141.64	3.6747	2.19e-14	4.55e-12	WRKY9, expressed
LOC_Os01g19170	382.484	70.8288	2.433	6.87e-07	2.77e-05	polygalacturonase, putative, expressed
LOC_Os01g19260	4775.18	280.594	4.089	0.00020771	0.0036431	ATPase, putative, expressed
LOC_Os01g19270	221.22	24.3131	3.1857	1.67e-07	7.96e-06	expressed protein
LOC_Os01g19460	54.2598	12.9285	2.0693	0.0010227	0.013197	retrotransposon protein, putative, unclassified, expressed
LOC_Os01g19940	818.821	231.192	1.8245	0.0018933	0.021635	expressed protein
LOC_Os01g20206	2022.11	48.8088	5.3726	3.06e-05	0.00071994	methyltransferase, putative, expressed
LOC_Os01g20900	2202.82	572.665	1.9436	1.69e-05	0.00043241	OsWAK4 - OsWAK receptor-like cytoplasmic kinase OsWAK-RLCK, expressed
LOC_Os01g22010	7364.32	1738.4	2.0828	4.76e-06	0.00014657	S-adenosylmethionine synthetase, putative, expressed
LOC_Os01g22336	68.7926	1.28321	5.7444	3e-06	9.87e-05	peroxidase precursor, putative, expressed
LOC_Os01g22352	293.098	3.84962	6.2505	0.00052787	0.0078067	peroxidase precursor, putative, expressed
LOC_Os01g22370	3423.17	260.301	3.7171	1.23e-09	9.65e-08	peroxidase precursor, putative, expressed
LOC_Os01g23070	442.077	12.9649	5.0916	0.00062016	0.008899	expressed protein
LOC_Os01g23100	8.52587	0	Inf	0.0018701	0.021418	expressed protein
LOC_Os01g23580	1260.7	8.08265	7.2852	3.19e-09	2.31e-07	inorganic H+ pyrophosphatase, putative, expressed
LOC_Os01g24430	221.38	82.0445	1.432	0.0022999	0.025303	expressed protein
LOC_Os01g24480	826.863	146.567	2.4961	9.56e-08	4.88e-06	DUF1399 containing protein, putative, expressed
LOC_Os01g24490	526.053	130.236	2.0141	0.00045963	0.0070091	expressed protein
LOC_Os01g25386	32517.9	11029.1	1.5599	0.00052939	0.0078139	multidrug resistance-associated protein, putative, expressed
LOC_Os01g25540	1110.18	260.786	2.0899	5.34e-06	0.00016149	RALFL6 - Rapid ALkalinization Factor RALF family protein precursor, expressed
LOC_Os01g26390	1267.49	159.037	2.9945	1.95e-10	1.83e-08	TKL_IRAK_DUF26-lh.1 - DUF26 kinases have homology to DUF26 containing loci, expressed
LOC_Os01g27210	2866.23	733.48	1.9663	0.0050734	0.046668	glutathione S-transferase, putative, expressed
LOC_Os01g27340	529.816	6.10364	6.4397	8.83e-07	3.45e-05	glutathione S-transferase, putative, expressed
LOC_Os01g27380	562.582	2.35902	7.8977	1.62e-13	2.82e-11	glutathione S-transferase, putative, expressed
LOC_Os01g27390	233.429	9.569	4.6085	2.71e-05	0.00064537	glutathione S-transferase, putative, expressed
LOC_Os01g28600	121.962	0	Inf	2.12e-09	1.59e-07	exo70 exocyst complex subunit family protein, putative, expressed
LOC_Os01g28790	1326.83	439.631	1.5936	0.003225	0.032777	PRAS-rich protein, putative, expressed
LOC_Os01g29280	212.435	5.64402	5.2342	0.00044573	0.0068544	expressed protein
LOC_Os01g29330	1903.06	451.638	2.0751	0.00011802	0.0022841	expressed protein
LOC_Os01g29860	14.1127	0.355505	5.311	0.00022995	0.0039804	expressed protein
LOC_Os01g31370	795.962	3.21732	7.9507	9.75e-18	3.87e-15	glycosyltransferase, putative, expressed
LOC_Os01g31450	40.9122	5.06252	3.0146	4.54e-05	0.0010007	retrotransposon protein, putative, unclassified, expressed
LOC_Os01g31980	1003.75	308.163	1.7036	0.00014505	0.0027188	MATE efflux family protein, putative, expressed
LOC_Os01g32380	276.608	4.92966	5.8102	0.00065586	0.0092883	expressed protein
LOC_Os01g32450	12.4431	0.308101	5.3358	0.0018601	0.021332	expressed protein
LOC_Os01g32670	961.572	7.68224	6.9677	3.09e-06	0.00010096	expressed protein
LOC_Os01g32680	61.9155	15.4534	2.0024	0.00086139	0.011548	transposon protein, putative, unclassified, expressed
LOC_Os01g32780	680.197	223.041	1.6086	0.00051097	0.0075975	universal stress protein domain containing protein, putative, expressed
LOC_Os01g33204	526.51	154.197	1.7717	0.00010627	0.0020883	retrotransposon protein, putative, unclassified, expressed
LOC_Os01g33869	295.567	2.83641	6.7033	7.22e-09	4.89e-07	expressed protein
LOC_Os01g36410	9.49212	0.308101	4.9453	0.0036722	0.036381	expressed protein
LOC_Os01g36790	222.362	41.296	2.4288	1.19e-06	4.45e-05	TKL_IRAK_DUF26-lf.2 - DUF26 kinases have homology to DUF26 containing loci, expressed
LOC_Os01g37040	2314.97	865.7	1.4191	0.0014234	0.017254	retrotransposon protein, putative, Ty1-copia subclass, expressed
LOC_Os01g37600	65.7318	14.2811	2.2025	0.0005421	0.0079737	agenet domain containing protein, expressed
LOC_Os01g37750	5557.87	574.283	3.2747	8.88e-12	1.1e-09	glutathione S-transferase, putative, expressed
LOC_Os01g37810	121.062	10.958	3.4657	1.12e-08	7.25e-07	expressed protein
LOC_Os01g38120	20.5494	0.320802	6.0013	0.00031677	0.0051702	plant protein of unknown function domain containing protein, expressed
LOC_Os01g38130	91.4457	3.66423	4.6413	2.67e-06	8.91e-05	expressed protein
LOC_Os01g38140	541.813	40.932	3.7265	8.23e-06	0.00023488	retrotransposon protein, putative, unclassified, expressed
LOC_Os01g38180	306.576	8.09613	5.2429	1.16e-09	9.14e-08	peptidyl-prolyl isomerase, putative, expressed
LOC_Os01g38190	238.084	56.3914	2.0779	2.75e-05	0.000654	plant protein of unknown function domain containing protein, expressed
LOC_Os01g38310	29.7556	1.06651	4.8022	8.16e-07	3.21e-05	expressed protein
LOC_Os01g38359	3161.5	990.744	1.674	0.0001203	0.0023232	peptidyl-prolyl cis-trans isomerase, FKBP-type, putative, expressed
LOC_Os01g38510	2664.98	1119.77	1.2509	0.0050367	0.046495	protein transport protein Sec61 subunit beta, putative, expressed
LOC_Os01g38660	1922.37	520.269	1.8856	2.83e-05	0.00067287	expressed protein
LOC_Os01g38980	2020.11	603.94	1.742	0.00012302	0.0023629	calmodulin-binding protein, putative, expressed
LOC_Os01g39136	73.6201	0.997108	6.2062	0.00039284	0.0061697	retrotransposon protein, putative, unclassified, expressed
LOC_Os01g39330	2643.75	376.357	2.8124	3.51e-08	1.98e-06	helix-loop-helix DNA-binding domain containing protein, expressed
LOC_Os01g39860	416.781	7.90996	5.7195	0.0017046	0.019938	1-aminocyclopropane-1-carboxylate oxidase protein, putative, expressed
LOC_Os01g39870	9.92251	0.320802	4.951	0.002887	0.030002	expressed protein
LOC_Os01g40070	5641.6	1059.09	2.4133	2.18e-05	0.00053659	expressed protein
LOC_Os01g40280	551.455	103.694	2.4109	5.89e-05	0.0012518	integral membrane protein, putative, expressed
LOC_Os01g40290	3413.78	10.3256	8.369	7.38e-11	7.72e-09	expressed protein
LOC_Os01g40320	336.228	19.8871	4.0795	1.16e-06	4.36e-05	DNA damage-binding protein 1, putative, expressed
LOC_Os01g40499	1801.01	363.409	2.3091	4.75e-07	1.99e-05	S-locus lectin protein kinase family protein, putative, expressed
LOC_Os01g40580	926.343	27.1402	5.093	1.18e-07	5.92e-06	hypersensitive-induced response protein, putative, expressed
LOC_Os01g40660	282.244	51.4051	2.457	3.35e-05	0.00077864	methyltransferase, putative, expressed
LOC_Os01g40870	13407.1	2522.68	2.41	1.52e-07	7.35e-06	aldehyde dehydrogenase, putative, expressed
LOC_Os01g41240	2608.54	625.101	2.0611	6.27e-06	0.00018551	hydrolase, alpha/beta fold family domain containing protein, expressed
LOC_Os01g41430	2033.39	36.4694	5.8011	0.0029861	0.030846	UDP-glucoronosyl and UDP-glucosyl transferase, putative, expressed
LOC_Os01g41510	102.033	4.31854	4.5624	2.12e-08	1.26e-06	calcineurin B, putative, expressed
LOC_Os01g41810	11998.1	2556.12	2.2308	0.0013373	0.016399	cytochrome P450 72A1, putative, expressed
LOC_Os01g41834	48.1453	2.44113	4.3018	3.46e-08	1.96e-06	chalcone synthase, putative, expressed
LOC_Os01g41990	318.625	87.2736	1.8682	0.0022006	0.024414	OsCML12 - Calmodulin-related calcium sensor protein, expressed
LOC_Os01g42200	73.5712	3.13181	4.5541	0.00013007	0.002477	expressed protein
LOC_Os01g42330	974.263	119.217	3.0307	3.5e-10	3.15e-08	retrotransposon protein, putative, unclassified, expressed
LOC_Os01g42370	197.938	6.37703	4.956	0.00016525	0.0030199	pleiotropic drug resistance protein, putative, expressed
LOC_Os01g42380	5023.07	886.406	2.5025	0.0010683	0.013644	pleiotropic drug resistance protein, putative, expressed
LOC_Os01g42410	9309.34	244.726	5.2494	2.82e-18	1.28e-15	pleiotropic drug resistance protein, putative, expressed
LOC_Os01g42780	262.963	7.27938	5.1749	6.51e-15	1.49e-12	cysteine proteinase EP-B 2 precursor, putative, expressed
LOC_Os01g42860	1290.16	4.21443	8.258	6.07e-05	0.0012871	inhibitor I family protein, putative, expressed
LOC_Os01g43320	530.279	53.4374	3.3108	0.00012829	0.0024509	transmembrane amino acid transporter protein, putative, expressed
LOC_Os01g43460	199.221	27.2274	2.8712	0.00013187	0.0025033	C4-dicarboxylate transporter/malic acid transport protein, expressed
LOC_Os01g43480	3709.78	776.36	2.2565	1.03e-06	3.93e-05	AAA-type ATPase family protein, putative, expressed
LOC_Os01g43650	1644.55	32.3813	5.6664	2.21e-10	2.06e-08	WRKY11, expressed
LOC_Os01g43720	574.235	8.20364	6.1292	4.93e-08	2.67e-06	cytochrome P450 72A1, putative, expressed
LOC_Os01g43750	3395.49	438.137	2.9542	5.32e-10	4.64e-08	cytochrome P450 72A1, putative, expressed
LOC_Os01g44120	244.152	17.1513	3.8314	1.29e-09	1.01e-07	expressed protein
LOC_Os01g45020	84.8658	26.4029	1.6845	0.0024846	0.026832	F-box protein interaction domain containing protein, expressed
LOC_Os01g45110	499.616	2.46481	7.6632	1.61e-08	1.01e-06	anthocyanin 3-O-beta-glucosyltransferase, putative, expressed
LOC_Os01g45250	5865.93	1671.62	1.8111	6.66e-05	0.0013904	DUF1645 domain containing protein, putative, expressed
LOC_Os01g45450	1408.77	89.8824	3.9703	1.45e-10	1.41e-08	AAA family ATPase, putative, expressed
LOC_Os01g45520	535.632	27.4957	4.284	4.3e-05	0.00095441	D-mannose binding lectin family protein, expressed
LOC_Os01g45910	1694.94	688.412	1.2999	0.0036061	0.035826	plastidic ATP/ADP-transporter, putative, expressed
LOC_Os01g46080	1473.39	452.571	1.7029	0.0001789	0.0032216	GDSL-like lipase/acylhydrolase, putative, expressed
LOC_Os01g46460	20.9186	2.88382	2.8587	0.0020915	0.023429	hypothetical protein
LOC_Os01g47070	27913.3	1102.53	4.6621	1.5e-06	5.4e-05	glycosyl hydrolase, putative, expressed
LOC_Os01g47300	12.6102	0	Inf	0.00024219	0.0041461	retrotransposon protein, putative, unclassified, expressed
LOC_Os01g47400	225.287	54.1432	2.0569	0.0012771	0.015774	OsMan01 - Endo-Beta-Mannanase, expressed
LOC_Os01g47410	2742.18	455.303	2.5904	0.00045295	0.0069339	aspartic proteinase oryzasin-1 precursor, putative, expressed
LOC_Os01g47580	586.659	1.69542	8.4347	7.71e-09	5.18e-07	lipid phosphatase protein, putative, expressed
LOC_Os01g47760	1903.61	286.496	2.7321	0.0019178	0.021845	OsGrx_I1 - glutaredoxin subgroup III, expressed
LOC_Os01g47830	40.137	10.8175	1.8916	0.005282	0.04814	retrotransposon protein, putative, unclassified, expressed
LOC_Os01g48020	319.78	98.6308	1.697	0.00042637	0.006612	S-locus-like receptor protein kinase, putative, expressed
LOC_Os01g48030	222.077	47.6654	2.22	1.35e-05	0.00035564	expressed protein
LOC_Os01g48290	740.905	286.148	1.3725	0.0023548	0.025765	dof zinc finger domain containing protein, putative, expressed
LOC_Os01g48360	2329.67	413.392	2.4945	8.1e-08	4.23e-06	expressed protein
LOC_Os01g48446	748.654	122.853	2.6074	5.33e-08	2.86e-06	no apical meristem protein, putative, expressed
LOC_Os01g49120	1863.39	551.659	1.7561	0.00090035	0.011955	MATE efflux family protein, putative, expressed
LOC_Os01g49320	4672.71	431.408	3.4371	6.19e-06	0.00018339	glycosyl hydrolase, putative, expressed
LOC_Os01g49580	732.24	198.515	1.8831	6.74e-05	0.0014036	Protein kinase domain containing protein, expressed
LOC_Os01g49710	485.361	152.959	1.6659	0.0046302	0.043566	glutathione S-transferase, putative, expressed
LOC_Os01g49720	827.284	142.495	2.5375	0.0017549	0.020379	glutathione S-transferase, putative, expressed
LOC_Os01g49820	3110.03	402.985	2.9481	1.76e-07	8.33e-06	lipid phosphatase protein, putative, expressed
LOC_Os01g50020	18.6375	0	Inf	2.56e-06	8.59e-05	expressed protein
LOC_Os01g50160	2138.22	443.977	2.2679	0.0018697	0.021418	MDR-like ABC transporter, putative, expressed
LOC_Os01g50170	313.118	101.25	1.6288	0.0048091	0.044881	eukaryotic aspartyl protease domain containing protein, expressed
LOC_Os01g50410	457.98	32.399	3.8213	0.0052248	0.047814	STE_MEKK_ste11_MAP3K.6 - STE kinases include homologs to sterile 7, sterile 11 and sterile 20 from yeast, expressed
LOC_Os01g50820	205.59	15.4991	3.7295	1.74e-05	0.00044222	transporter, major facilitator family, putative, expressed
LOC_Os01g50870	559.552	57.4586	3.2837	4.13e-11	4.59e-09	expressed protein
LOC_Os01g50940	258.476	59.1345	2.128	1.78e-05	0.00045106	helix-loop-helix DNA-binding domain containing protein, expressed
LOC_Os01g51010	2970.57	1225.82	1.277	0.0040589	0.039245	DUF292 domain containing protein, expressed
LOC_Os01g51210	232.248	50.7686	2.1937	8.59e-06	0.00024425	uncharacterized protein PA4923, putative, expressed
LOC_Os01g51540	3034.19	146.224	4.3751	1.63e-18	7.55e-16	cytidine/deoxycytidylate deaminase, putative, expressed
LOC_Os01g51670	10518.4	195.391	5.7504	1.44e-09	1.11e-07	expressed protein
LOC_Os01g52320	319.214	3.80472	6.3906	0.00017817	0.0032111	NB-ARC domain containing protein, expressed
LOC_Os01g52330	470.587	23.3304	4.3342	1.06e-12	1.63e-10	NB-ARC domain containing protein, expressed
LOC_Os01g52340	199.587	48.2681	2.0479	4.43e-05	0.00098038	NB-ARC domain containing protein, expressed
LOC_Os01g52380	98.0187	22.7964	2.1043	0.0031806	0.03246	expressed protein
LOC_Os01g52470	78.301	0.616202	6.9895	0.00049726	0.0074527	elongation factor, putative, expressed
LOC_Os01g52530	874.182	42.8611	4.3502	0.0004928	0.0074026	phosphoribosyl transferase, putative, expressed
LOC_Os01g52570	417.043	59.016	2.821	1.58e-08	9.85e-07	lachrymatory factor synthase, putative, expressed
LOC_Os01g52610	302.079	13.824	4.4497	7.25e-05	0.0014972	membrane associated DUF588 domain containing protein, putative, expressed
LOC_Os01g52730	302.012	24.7439	3.6095	0.00024185	0.0041423	DUF584 domain containing protein, putative, expressed
LOC_Os01g52790	3023.53	845.809	1.8378	0.0019494	0.022086	cytochrome P450 72A1, putative, expressed
LOC_Os01g52970	221.263	45.0466	2.2963	4.84e-06	0.00014877	OsFBX22 - F-box domain containing protein, expressed
LOC_Os01g52980	726.196	250.81	1.5338	0.0016913	0.019822	OsFBX23 - F-box domain containing protein, expressed
LOC_Os01g53040	4829.28	81.7081	5.8852	5.42e-12	7.1e-10	WRKY14, expressed
LOC_Os01g53350	18765.7	2957.41	2.6657	1.29e-08	8.21e-07	anthocyanidin 5,3-O-glucosyltransferase, putative, expressed
LOC_Os01g53420	1255.8	260.159	2.2711	7.4e-07	2.95e-05	anthocyanidin 5,3-O-glucosyltransferase, putative, expressed
LOC_Os01g53430	20.7544	1.62601	3.674	0.0002631	0.0044277	anthocyanidin 5,3-O-glucosyltransferase, putative, expressed
LOC_Os01g53570	36.6722	1.62601	4.4953	3.77e-07	1.62e-05	aluminum-activated malate transporter, putative, expressed
LOC_Os01g54510	2213.9	757.531	1.5472	0.00055141	0.0080747	MAC/Perforin domain containing protein, putative, expressed
LOC_Os01g54600	7565.75	3172.75	1.2538	0.0033819	0.033995	WRKY13, expressed
LOC_Os01g54700	794.009	225.376	1.8168	6.82e-05	0.0014185	retrotransposon protein, putative, unclassified, expressed
LOC_Os01g54950	64.8295	13.747	2.2375	0.00019854	0.0035028	expressed protein
LOC_Os01g55160	8.59626	0	Inf	0.0025637	0.027508	expressed protein
LOC_Os01g55330	48.7229	0.71101	6.0986	0.00034748	0.0055856	embryonic protein DC-8, putative, expressed
LOC_Os01g55340	228.315	7.13717	4.9995	3.35e-17	1.26e-14	dof zinc finger domain containing protein, putative, expressed
LOC_Os01g55540	3370.76	1403.58	1.264	0.0039232	0.038243	aminotransferase, classes I and II, domain containing protein, expressed
LOC_Os01g55940	1067.23	122.71	3.1205	0.0011085	0.014055	OsGH3.2 - Probable indole-3-acetic acid-amido synthetase, expressed
LOC_Os01g55974	887.061	302.46	1.5523	0.00067417	0.0094837	deoxycytidylate deaminase, putative, expressed
LOC_Os01g56080	805.351	221.378	1.8631	0.0012586	0.015605	expressed protein
LOC_Os01g56220	377.414	23.5876	4	6.25e-09	4.29e-07	expressed protein
LOC_Os01g56235	22.8028	2.08562	3.4507	0.0042774	0.040914	expressed protein
LOC_Os01g56240	637.304	9.49615	6.0685	1.62e-16	5.45e-14	OsSAUR2 - Auxin-responsive SAUR gene family member, expressed
LOC_Os01g56260	170.368	56.355	1.596	0.0012428	0.015429	expressed protein
LOC_Os01g56880	2592.75	784.915	1.7239	9.45e-05	0.0018814	purple acid phosphatase precursor, putative, expressed
LOC_Os01g57073	12802.1	1483.27	3.1095	1.48e-05	0.00038663	insulin-degrading enzyme, putative, expressed
LOC_Os01g57230	8.81887	0	Inf	0.0014901	0.017904	BTBN1 - Bric-a-Brac, Tramtrack, Broad Complex BTB domain with non-phototropic hypocotyl 3 NPH3 and coiled-coil domains, expressed
LOC_Os01g57540	121.266	36.2225	1.7432	0.00073355	0.010149	protein kinase, putative, expressed
LOC_Os01g57620	19.6206	0	Inf	1.43e-06	5.17e-05	expressed protein
LOC_Os01g57730	1265.53	35.0627	5.1737	5.03e-18	2.06e-15	peroxidase precursor, putative, expressed
LOC_Os01g57740	871.459	281.647	1.6295	0.000409	0.0063897	expressed protein
LOC_Os01g57854	398.291	21.8991	4.1849	0.00010183	0.0020132	pectinesterase, putative, expressed
LOC_Os01g58130	687.665	10.3984	6.0473	1.86e-10	1.77e-08	expressed protein
LOC_Os01g58140	1337.68	335.15	1.9969	0.00046677	0.0070971	expressed protein
LOC_Os01g58220	3890.36	1339.98	1.5377	0.00063086	0.0090201	translation initiation factor SUI1, putative, expressed
LOC_Os01g58230	204.414	36.8775	2.4707	6.95e-06	0.0002025	expressed protein
LOC_Os01g58240	8614.01	511.511	4.0738	7.24e-08	3.8e-06	OsSub6 - Putative Subtilisin homologue, expressed
LOC_Os01g58280	9695.37	847.673	3.5157	1.43e-13	2.53e-11	OsSub8 - Putative Subtilisin homologue, expressed
LOC_Os01g58290	1190.35	66.8652	4.154	0.00094842	0.01245	OsSub9 - Putative Subtilisin homologue, expressed
LOC_Os01g58300	62.8634	1.42202	5.4662	0.00025932	0.0043807	expressed protein
LOC_Os01g58320	1100.31	2.93122	8.5522	7.97e-11	8.21e-09	expressed protein
LOC_Os01g58340	59.4041	3.77002	3.9779	4.39e-08	2.4e-06	expressed protein
LOC_Os01g58350	6106.85	82.7017	6.2064	2.18e-06	7.46e-05	expressed protein
LOC_Os01g58370	253.133	2.97522	6.4108	0.0016789	0.019695	expressed protein
LOC_Os01g58500	788.356	166.18	2.2461	0.0016041	0.018989	expressed protein
LOC_Os01g58510	317.557	66.2675	2.2606	2.75e-05	0.000654	NB-ARC domain containing protein, expressed
LOC_Os01g58610	57.4449	12.81	2.1649	0.00046374	0.0070658	phosphoglycerate kinase protein, putative, expressed
LOC_Os01g58620	720.539	283.604	1.3452	0.0031894	0.032529	expressed protein
LOC_Os01g58890	51560.6	19839.5	1.3779	0.0018039	0.020821	cysteine proteinase inhibitor precursor protein, putative, expressed
LOC_Os01g59000	1153.83	434.502	1.409	0.0015554	0.018539	cytochrome P450, putative, expressed
LOC_Os01g59100	1208.05	273.276	2.1442	3.58e-06	0.00011485	cytokinin-N-glucosyltransferase 1, putative, expressed
LOC_Os01g59320	811.175	219.026	1.8889	3.78e-05	0.00086212	expressed protein
LOC_Os01g60020	1164.16	71.987	4.0154	0.0045418	0.043017	NAC domain transcription factor, putative, expressed
LOC_Os01g60120	1562.93	601.36	1.378	0.0017713	0.020517	transmembrane protein 56, putative, expressed
LOC_Os01g60420	880.729	233.806	1.9134	4.65e-05	0.0010195	expressed protein
LOC_Os01g60600	79.1749	5.36132	3.8844	0.0019486	0.022084	WRKY108, expressed
LOC_Os01g60640	358.485	10.8505	5.0461	3.6e-14	7.31e-12	WRKY21, expressed
LOC_Os01g60690	35.9119	0.355505	6.6585	4.36e-09	3.08e-07	expressed protein
LOC_Os01g60700	1505.78	522.813	1.5261	0.001067	0.013635	serine/threonine-protein kinase NAK, putative, expressed
LOC_Os01g60930	4016.44	467.701	3.1023	5.12e-11	5.56e-09	expressed protein
LOC_Os01g61080	4195.47	772.099	2.442	4.11e-05	0.00092171	WRKY24, expressed
LOC_Os01g61190	805.364	178.358	2.1749	2.98e-06	9.83e-05	exo70 exocyst complex subunit, putative, expressed
LOC_Os01g61200	50.1883	10.6956	2.2303	0.00056369	0.0082141	GDSL-like lipase/acylhydrolase, putative, expressed
LOC_Os01g61340	85.8143	0.71101	6.9152	6.09e-14	1.13e-11	expressed protein
LOC_Os01g61460	3846.23	589.296	2.7064	5.95e-05	0.0012631	leaf senescence related protein, putative, expressed
LOC_Os01g61510	6921.89	33.177	7.7048	5.42e-16	1.67e-13	ammonium transporter protein, putative, expressed
LOC_Os01g61610	188.787	0.949704	7.6351	0.00011176	0.0021841	flavonol synthase/flavanone 3-hydroxylase, putative, expressed
LOC_Os01g61680	729.648	218.594	1.7389	0.00011124	0.0021752	expressed protein
LOC_Os01g62010	90.5767	11.5395	2.9726	5.9e-07	2.41e-05	hydrolase, alpha/beta fold family domain containing protein, expressed
LOC_Os01g62030	116.001	26.083	2.153	6.98e-05	0.0014484	disease resistance-responsive family protein, putative, expressed
LOC_Os01g62130	615.776	79.3433	2.9562	0.0030104	0.031065	ZOS1-14 - C2H2 zinc finger protein, expressed
LOC_Os01g62190	55.7817	0	Inf	1.06e-06	4.01e-05	ZOS1-15 - C2H2 zinc finger protein, expressed
LOC_Os01g62660	148.022	16.0747	3.2029	8.26e-09	5.49e-07	MYB family transcription factor, putative, expressed
LOC_Os01g62670	3075.26	52.4367	5.874	2.99e-19	1.57e-16	avr9/Cf-9 rapidly elicited protein, putative, expressed
LOC_Os01g62850	588.934	23.5055	4.647	2.7e-09	1.99e-07	membrane associated DUF588 domain containing protein, putative, expressed
LOC_Os01g63060	2173.85	427.512	2.3462	3.22e-07	1.41e-05	phosphatidic acid phosphatase-related, putative, expressed
LOC_Os01g63180	4810.03	132.724	5.1795	7.9e-15	1.78e-12	laccase-6 precursor, putative, expressed
LOC_Os01g63210	6306.84	1398.85	2.1727	0.0014174	0.017198	SOUL heme-binding protein, putative, expressed
LOC_Os01g63690	2323.63	198.599	3.5485	0.00099748	0.012942	hs1, putative, expressed
LOC_Os01g63920	12.0174	0.962405	3.6423	0.0042477	0.040673	hypothetical protein
LOC_Os01g63980	324.675	14.5156	4.4833	7.29e-16	2.15e-13	ZOS1-17 - C2H2 zinc finger protein, expressed
LOC_Os01g64120	94.3025	24.3614	1.9527	0.00038917	0.0061233	2Fe-2S iron-sulfur cluster binding domain containing protein, expressed
LOC_Os01g64300	110.33	41.1301	1.4236	0.0050937	0.04683	DUF584 domain containing protein, putative, expressed
LOC_Os01g64470	4956.64	105.074	5.5599	1.7e-07	8.09e-06	harpin-induced protein 1 domain containing protein, expressed
LOC_Os01g64480	30.5644	4.46242	2.776	0.00046818	0.0071061	harpin-induced protein 1 domain containing protein, expressed
LOC_Os01g64860	66.8382	0.628903	6.7317	3.17e-13	5.29e-11	OsSub11 - Putative Subtilisin homologue, expressed
LOC_Os01g65090	993.928	323.539	1.6192	0.00033713	0.0054469	aminotransferase, classes I and II, domain containing protein, expressed
LOC_Os01g65380	4355.37	401.197	3.4404	1.9e-08	1.15e-06	patellin protein, putative, expressed
LOC_Os01g65680	6126.55	2037.92	1.588	0.00041022	0.0064039	4,5-DOPA dioxygenase extradiol, putative, expressed
LOC_Os01g65710	43.1675	5.91915	2.8665	0.00084867	0.011426	expressed protein
LOC_Os01g65950	22.9292	3.12841	2.8737	0.0052334	0.047857	thioesterase family protein, putative, expressed
LOC_Os01g66130	593.308	119.889	2.3071	0.0033127	0.033468	armadillo/beta-catenin repeat family protein, putative, expressed
LOC_Os01g66480	1087.67	18.983	5.8404	2.14e-22	1.96e-19	expressed protein
LOC_Os01g66530	159.945	4.00704	5.3189	0.00025715	0.0043484	ARGOS, putative, expressed
LOC_Os01g66544	36.6269	7.88628	2.2155	0.0018276	0.021046	expressed protein
LOC_Os01g66740	134.502	36.0819	1.8983	0.00028081	0.0046622	inactive receptor kinase At1g27190 precursor, putative, expressed
LOC_Os01g66830	994.805	419.989	1.2441	0.0037776	0.037168	pectinacetylesterase domain containing protein, expressed
LOC_Os01g66990	117.845	11.0799	3.4109	0.0037036	0.036611	expressed protein
LOC_Os01g67420	383.38	44.537	3.1057	1.01e-05	0.00027999	lipase, putative, expressed
LOC_Os01g67820	270.673	18.1247	3.9005	7.31e-13	1.15e-10	exo70 exocyst complex subunit domain containing protein, expressed
LOC_Os01g68060	3734.21	454.164	3.0395	6.94e-07	2.79e-05	copine, putative, expressed
LOC_Os01g68460	213.404	13.0792	4.0282	6.87e-06	0.00020058	DC1, putative, expressed
LOC_Os01g68470	442.517	23.7273	4.2211	1.9e-15	5e-13	expressed protein
LOC_Os01g68720	12138.6	411.557	4.8824	1.27e-13	2.25e-11	keratin, type I cytoskeletal 9, putative, expressed
LOC_Os01g68730	3077.05	17.1353	7.4884	1.35e-11	1.64e-09	RNA-binding protein FUS, putative, expressed
LOC_Os01g68740	2444.48	194.187	3.654	4.81e-14	9.29e-12	keratin, type I cytoskeletal 9, putative, expressed
LOC_Os01g69190	58.9447	3.73704	3.9794	0.00025524	0.004324	regulatory protein, putative, expressed
LOC_Os01g70130	4030.9	1370.36	1.5565	0.00077406	0.010585	protein kinase domain containing protein, expressed
LOC_Os01g70150	30.4511	0.663606	5.52	0.0018	0.020788	expressed protein
LOC_Os01g70170	13380.8	3269.02	2.0332	5.27e-06	0.00015977	transaldolase, putative, expressed
LOC_Os01g70180	318.365	56.592	2.492	3.19e-07	1.4e-05	exostosin family domain containing protein, expressed
LOC_Os01g70200	1168.63	142.606	3.0347	3.64e-05	0.0008346	exostosin family domain containing protein, expressed
LOC_Os01g70210	10768.9	2813.37	1.9365	1.81e-05	0.00045702	CRAL/TRIO domain containing protein, expressed
LOC_Os01g70490	3981.31	214.82	4.212	1.36e-17	5.34e-15	potassium transporter, putative, expressed
LOC_Os01g70525	71.0862	22.0471	1.689	0.0034488	0.034503	tropinone reductase, putative, expressed
LOC_Os01g70540	5993.07	1358.93	2.1408	5.8e-06	0.0001733	retrotransposon protein, putative, unclassified, expressed
LOC_Os01g70790	3678.04	618.73	2.5716	2.63e-08	1.54e-06	SRC2 protein, putative, expressed
LOC_Os01g70820	821.423	156.959	2.3877	3.79e-05	0.00086229	lumenal PsbP, putative, expressed
LOC_Os01g70850	419.452	107.028	1.9705	3.23e-05	0.00075427	esterase, putative, expressed
LOC_Os01g70860	158.881	60.8055	1.3857	0.0054577	0.049314	esterase, putative, expressed
LOC_Os01g71350	2006.08	135.67	3.8862	2.21e-15	5.69e-13	glycosyl hydrolases family 17, putative, expressed
LOC_Os01g71680	31.0834	1.62601	4.2567	2.92e-06	9.64e-05	glycosyl hydrolases family 17, putative, expressed
LOC_Os01g71690	8545.12	535.151	3.9971	3.62e-16	1.16e-13	recA protein, expressed
LOC_Os01g71700	778.865	14.1389	5.7836	1.22e-24	1.99e-21	amino acid permease family protein, putative, expressed
LOC_Os01g71760	1126.68	17.9072	5.9754	4.19e-19	2.14e-16	amino acid permease family protein, putative, expressed
LOC_Os01g71830	30.1202	0.71101	5.4047	0.0017635	0.020451	glycosyl hydrolases family 17, putative, expressed
LOC_Os01g71950	90.2536	10.7405	3.0709	3.56e-07	1.54e-05	expressed protein
LOC_Os01g72009	3885.49	1301.63	1.5778	0.0003825	0.0060444	expressed protein
LOC_Os01g72080	12689.1	2737.26	2.2128	0.0027029	0.028519	calmodulin-like protein 1, putative, expressed
LOC_Os01g72120	1431.97	174.426	3.0373	2.07e-10	1.94e-08	glutathione S-transferase, putative, expressed
LOC_Os01g72130	6438.52	363.267	4.1476	6.81e-06	0.00019925	glutathione S-transferase, putative, expressed
LOC_Os01g72140	222.335	0.641604	8.4368	1.55e-08	9.72e-07	glutathione S-transferase, putative, expressed
LOC_Os01g72150	420.327	0.663606	9.307	2.95e-05	0.00069752	glutathione S-transferase, putative, expressed
LOC_Os01g72160	25.6914	3.13181	3.0362	0.00056254	0.0082006	glutathione S-transferase, putative, expressed
LOC_Os01g72170	3812.15	1069.39	1.8338	6.21e-05	0.0013114	glutathione S-transferase, putative, expressed
LOC_Os01g72460	478.568	59.1902	3.0153	0.0024235	0.026347	NADPH quinone oxidoreductase, putative, expressed
LOC_Os01g72490	358.238	20.8164	4.1051	2.45e-14	5.07e-12	LRP1, putative, expressed
LOC_Os01g72530	2739.13	121.05	4.5	1.03e-10	1.04e-08	OsCML31 - Calmodulin-related calcium sensor protein, expressed
LOC_Os01g72560	12.4493	0.308101	5.3365	0.0005037	0.0075146	expressed protein
LOC_Os01g72570	558.484	224.367	1.3157	0.0049105	0.045602	expressed protein
LOC_Os01g72600	334.766	16.7908	4.3174	4.86e-15	1.14e-12	spotted leaf 11, putative, expressed
LOC_Os01g72620	112.948	6.91035	4.0308	1.3e-06	4.77e-05	expressed protein
LOC_Os01g72630	400.375	6.13076	6.0291	1.39e-07	6.81e-06	expressed protein
LOC_Os01g72680	1331.36	9.60193	7.1154	5e-18	2.06e-15	disease resistance protein RPS2, putative, expressed
LOC_Os01g72900	820.875	3.74801	7.7749	2.63e-10	2.39e-08	abscisic stress-ripening, putative, expressed
LOC_Os01g72910	660.537	5.13533	7.007	3.47e-08	1.96e-06	abscisic stress-ripening, putative, expressed
LOC_Os01g72920	22.7205	0.308101	6.2044	2e-06	6.9e-05	expressed protein
LOC_Os01g72930	293.347	42.3786	2.7912	1.06e-06	4.03e-05	pentatricopeptide, putative, expressed
LOC_Os01g72960	1327.53	470.112	1.4977	0.00094515	0.012421	expressed protein
LOC_Os01g72970	3260.96	63.8865	5.6736	1.79e-08	1.09e-06	DUF630/DUF632 domains containing protein, putative, expressed
LOC_Os01g72990	6837.32	2704.88	1.3379	0.0020052	0.022617	expressed protein
LOC_Os01g73110	92.6841	30.7748	1.5906	0.0027537	0.028899	expressed protein
LOC_Os01g73170	5915.19	767.328	2.9465	0.00015655	0.002895	peroxidase precursor, putative, expressed
LOC_Os01g73500	5413.23	1591.11	1.7665	0.0035818	0.035614	expressed protein
LOC_Os01g73980	37.8832	0.924303	5.357	3.09e-08	1.77e-06	xylem cysteine proteinase 2 precursor, putative, expressed
LOC_Os01g74510	533.095	218.886	1.2842	0.0049805	0.046109	KIP1, putative, expressed
LOC_Os02g01890	658.467	174.141	1.9189	9.86e-05	0.0019552	cytochrome P450, putative, expressed
LOC_Os02g02490	91.4649	16.4294	2.4769	0.00016354	0.0029963	phytosulfokine receptor precursor, putative, expressed
LOC_Os02g02600	3320.53	746.836	2.1525	4.67e-06	0.00014433	serine/threonine-protein kinase Cx32, chloroplast precursor, putative, expressed
LOC_Os02g02730	893.614	221.081	2.0151	1.73e-05	0.0004415	expressed protein
LOC_Os02g03020	9309.31	3011.42	1.6282	0.00024458	0.004173	EF hand family protein, putative, expressed
LOC_Os02g03280	5632.37	1211.29	2.2172	0.00081294	0.01104	transmembrane BAX inhibitor motif-containing protein, putative, expressed
LOC_Os02g03310	108.574	8.80886	3.6236	1.8e-05	0.00045445	KH domain containing protein, putative, expressed
LOC_Os02g03380	51.8865	2.96592	4.1288	0.0046346	0.043584	retrotransposon protein, putative, unclassified, expressed
LOC_Os02g03390	11.3744	0.355505	4.9998	0.0011204	0.014186	expressed protein
LOC_Os02g03400	87.5912	23.1043	1.9226	0.00071156	0.0099139	microtubule associated protein, putative, expressed
LOC_Os02g04120	1764.5	298.206	2.5649	3.52e-08	1.98e-06	cytidylyltransferase domain containing protein, expressed
LOC_Os02g04130	1228.63	31.4613	5.2873	7.25e-09	4.89e-07	DUF1645 domain containing protein, putative, expressed
LOC_Os02g04170	572.041	106.588	2.4241	0.00038477	0.0060696	L-aspartate oxidase 1, putative, expressed
LOC_Os02g04230	3871.32	733.202	2.4005	2.32e-05	0.00056563	CGMC_MAPKCMGC_2.7 - CGMC includes CDA, MAPK, GSK3, and CLKC kinases, expressed
LOC_Os02g04250	3778.45	1115.42	1.7602	8.95e-05	0.0017977	glycosyltransferase, putative, expressed
LOC_Os02g04340	153.627	11.2407	3.7726	6.07e-11	6.46e-09	NIN-like protein 2, putative, expressed
LOC_Os02g04630	171.865	10.8107	3.9907	6.1e-12	7.82e-10	sodium/calcium exchanger protein, putative, expressed
LOC_Os02g05040	193.393	19.198	3.3325	8.7e-10	7.15e-08	cyclin-related protein, putative, expressed
LOC_Os02g05050	143.791	43.6203	1.7209	0.00073499	0.010163	OsSAUR4 - Auxin-responsive SAUR gene family member, expressed
LOC_Os02g05070	115.394	0	Inf	2.82e-09	2.07e-07	expressed protein
LOC_Os02g05330	4022.61	1478.05	1.4444	0.0011982	0.014985	DEAD-box ATP-dependent RNA helicase, putative, expressed
LOC_Os02g05640	680.95	105.654	2.6882	1.44e-08	9.09e-07	homeobox associated leucine zipper, putative, expressed
LOC_Os02g05960	899.528	156.825	2.52	1.16e-07	5.81e-06	phytosulfokine receptor precursor, putative, expressed
LOC_Os02g05970	212.328	29.5863	2.8433	3.19e-05	0.00074606	phytosulfokine receptor precursor, putative, expressed
LOC_Os02g06130	78.0509	1.87401	5.3802	4.53e-06	0.00014122	phytosulfokine receptor precursor, putative, expressed
LOC_Os02g06200	1454.54	370.636	1.9725	0.00015832	0.0029202	phytosulfokine receptor precursor, putative, expressed
LOC_Os02g06310	18.4661	0	Inf	0.0032478	0.032962	expressed protein
LOC_Os02g06330	1274.86	453.766	1.4903	0.00086938	0.01163	AP2 domain containing protein, expressed
LOC_Os02g06490	139.592	5.45273	4.6781	2.52e-07	1.13e-05	vacuolar protein sorting-associated protein 4, putative, expressed
LOC_Os02g06600	35.7012	4.75442	2.9086	0.002457	0.026637	receptor-like protein kinase 2 precursor, putative, expressed
LOC_Os02g06770	243.504	34.2596	2.8294	1.3e-08	8.25e-07	expressed protein
LOC_Os02g06810	342.97	72.3035	2.2459	2.98e-06	9.83e-05	retrotransposon protein, putative, unclassified, expressed
LOC_Os02g06820	146.469	39.2712	1.8991	0.0002589	0.0043756	transposon protein, putative, unclassified, expressed
LOC_Os02g06830	457.424	8.29845	5.7845	2.93e-15	7.28e-13	expressed protein
LOC_Os02g06930	787.933	135.266	2.5423	9.48e-08	4.86e-06	protein kinase, putative, expressed
LOC_Os02g06940	189.57	0	Inf	6.82e-26	1.88e-22	expressed protein
LOC_Os02g07010	1744.91	309.439	2.4954	3.23e-05	0.00075427	expressed protein
LOC_Os02g07170	134.553	0.984407	7.0947	2.07e-05	0.00051558	MYB family transcription factor, putative, expressed
LOC_Os02g07690	13086.8	1521.13	3.1049	0.00032647	0.0053093	VQ domain containing protein, putative, expressed
LOC_Os02g07750	4951.21	1084.83	2.1903	1.66e-06	5.87e-05	cell cycle control protein, putative, expressed
LOC_Os02g08010	3552.3	750.978	2.2419	8.23e-07	3.24e-05	LTPL43 - Protease inhibitor/seed storage/LTP family protein precursor, putative, expressed
LOC_Os02g08014	49.5285	13.4228	1.8836	0.002673	0.028285	expressed protein
LOC_Os02g08018	2263.48	466.392	2.2789	5.48e-07	2.26e-05	calcium-transporting ATPase 9, plasma membrane-type, putative, expressed
LOC_Os02g08030	37.8794	3.61683	3.3886	1.23e-05	0.00032757	aldose 1-epimerase, putative, expressed
LOC_Os02g08100	10145.6	3132.62	1.6954	0.00085326	0.011466	AMP-binding domain containing protein, expressed
LOC_Os02g08420	3217.49	479.807	2.7454	2.54e-05	0.00061148	cinnamoyl CoA reductase, putative, expressed
LOC_Os02g09110	15.4217	0.308101	5.6454	9.01e-05	0.0018041	transposon protein, putative, unclassified, expressed
LOC_Os02g09120	54.4599	1.95611	4.7991	1.71e-09	1.29e-07	isoleucyl-tRNA synthetase, cytoplasmic, putative, expressed
LOC_Os02g09220	526.318	46.1563	3.5113	0.0043424	0.041405	cytochrome P450, putative, expressed
LOC_Os02g09250	2478.27	367.684	2.7528	5.28e-09	3.65e-07	cytochrome P450 71D10, putative, expressed
LOC_Os02g09490	6533.99	1392.03	2.2308	1.33e-06	4.86e-05	dehydrogenase, putative, expressed
LOC_Os02g09810	593.543	50.7653	3.5474	1.12e-07	5.64e-06	amino acid transporter, putative, expressed
LOC_Os02g09960	7165.1	1225.61	2.5475	4.07e-05	0.00091402	LYK8, putative, expressed
LOC_Os02g09980	203.203	50.0963	2.0201	6.27e-05	0.0013197	expressed protein
LOC_Os02g09990	500.679	53.9747	3.2135	1.06e-10	1.07e-08	expressed protein
LOC_Os02g10040	776.946	261.173	1.5728	0.0006008	0.0086525	guanine nucleotide-exchange protein like, putative, expressed
LOC_Os02g10140	328.853	56.4651	2.542	5.8e-06	0.0001733	bZIP transcription factor domain containing protein, expressed
LOC_Os02g10150	220.796	57.1338	1.9503	0.00020291	0.0035695	bZIP transcription factor, putative, expressed
LOC_Os02g10460	13.9433	0.641604	4.4417	0.0033422	0.03371	expressed protein
LOC_Os02g10730	1207.31	78.6205	3.9408	1.4e-06	5.09e-05	expressed protein
LOC_Os02g10850	2570.15	841.826	1.6103	0.00036241	0.005778	OsFBK3 - F-box domain and kelch repeat containing protein, expressed
LOC_Os02g10900	1782.02	714.72	1.3181	0.0034621	0.034607	NB-ARC domain containing protein, expressed
LOC_Os02g10920	2649.72	1060.38	1.3213	0.0032154	0.032717	zinc finger family protein, putative, expressed
LOC_Os02g11020	1336.09	5.33592	7.9681	3.84e-06	0.00012233	cytochrome P450 72A1, putative, expressed
LOC_Os02g11070	4062.08	627.148	2.6953	1.09e-08	7.1e-07	3-ketoacyl-CoA synthase, putative, expressed
LOC_Os02g11870	764.531	59.441	3.685	3.65e-13	6.05e-11	expressed protein
LOC_Os02g11970	52.0404	2.05092	4.6653	4.09e-09	2.92e-07	expressed protein
LOC_Os02g12010	501.769	30.167	4.056	0.0015053	0.018038	receptor-like protein kinase precursor, putative, expressed
LOC_Os02g12020	706.83	0.616202	10.164	1.35e-07	6.65e-06	expressed protein
LOC_Os02g12080	330.488	24.6592	3.7444	0.00059458	0.0085768	expressed protein
LOC_Os02g12090	522.417	23.884	4.4511	0.00016251	0.002982	expressed protein
LOC_Os02g12230	63.5647	0.308101	7.6887	0.0046316	0.043568	hypothetical protein
LOC_Os02g12250	313.447	23.8424	3.7166	0.00035579	0.0056954	expressed protein
LOC_Os02g12260	248.157	8.04115	4.9477	1.21e-06	4.5e-05	expressed protein
LOC_Os02g12350	739.054	42.6984	4.1134	2.65e-06	8.86e-05	histone deacetylase, putative, expressed
LOC_Os02g12380	1220.55	67.9334	4.1673	7.12e-08	3.75e-06	histone deacetylase, putative, expressed
LOC_Os02g12420	1073.41	177.02	2.6002	4.13e-05	0.00092446	receptor-like protein kinase precursor, putative, expressed
LOC_Os02g12560	197.763	1.25781	7.2967	1.72e-22	1.61e-19	expressed protein
LOC_Os02g12870	1325.53	406.76	1.7043	0.0001627	0.0029839	expressed protein
LOC_Os02g12900	879.095	185.641	2.2435	1.84e-06	6.42e-05	cysteine synthase, putative, expressed
LOC_Os02g13300	1486.46	509.04	1.546	0.0011032	0.013998	mitochondrial carrier protein, putative, expressed
LOC_Os02g13460	455.075	166.741	1.4485	0.0036454	0.036166	receptor-like protein kinase 2 precursor, putative, expressed
LOC_Os02g13780	1315.83	3.56942	8.5261	4.68e-11	5.12e-09	receptor-like protein kinase 2 precursor, putative, expressed
LOC_Os02g13800	147.45	27.1301	2.4423	0.0014593	0.017605	HSF-type DNA-binding domain containing protein, expressed
LOC_Os02g13870	185.812	33.0492	2.4912	0.00038626	0.0060876	aquaporin protein, putative, expressed
LOC_Os02g13960	3579.28	1461.29	1.2924	0.0034133	0.034235	spotted leaf 11, putative, expressed
LOC_Os02g14130	4430.81	1800.45	1.2992	0.0034208	0.03428	CGMC_GSK.4 - CGMC includes CDA, MAPK, GSK3, and CLKC kinases, expressed
LOC_Os02g14630	135.253	0.641604	7.7198	2.63e-05	0.0006298	hydroquinone glucosyltransferase, putative, expressed
LOC_Os02g14760	3156.47	1094.85	1.5276	0.00058606	0.0084827	CID11, putative, expressed
LOC_Os02g14990	865.667	136.992	2.6597	1.83e-08	1.11e-06	zinc finger, C3HC4 type domain containing protein, expressed
LOC_Os02g15000	118.181	2.01622	5.8732	1.44e-12	2.12e-10	zinc finger, C3HC4 type domain containing protein, expressed
LOC_Os02g15010	125.988	2.00352	5.9746	4.26e-06	0.00013319	zinc finger, C3HC4 type domain containing protein, expressed
LOC_Os02g15350	674.553	11.8002	5.837	0.00064169	0.0091324	dof zinc finger domain containing protein, putative, expressed
LOC_Os02g15560	263.902	63.4058	2.0573	6.12e-05	0.0012959	transposon protein, putative, Mutator sub-class, expressed
LOC_Os02g15700	91.5953	20.0098	2.1946	8.02e-05	0.0016296	expressed protein
LOC_Os02g16040	4710.56	1047.83	2.1685	0.0011702	0.014697	ubiquitin-conjugating enzyme, putative, expressed
LOC_Os02g16060	789.833	206.903	1.9326	1.96e-05	0.00049046	RGA-1, putative, expressed
LOC_Os02g16940	42042.9	0.924303	15.473	4.78e-20	2.95e-17	OsSub13 - Putative Subtilisin homologue, expressed
LOC_Os02g16995	136.271	0	Inf	3.45e-07	1.5e-05	expressed protein
LOC_Os02g17000	670.342	0	Inf	3.5e-08	1.97e-06	OsSub14 - Putative Subtilisin homologue, expressed
LOC_Os02g17534	6391.93	767.922	3.0572	3.96e-10	3.53e-08	xyloglucan fucosyltransferase, putative, expressed
LOC_Os02g17590	1073.57	126.735	3.0825	1.45e-10	1.41e-08	expressed protein
LOC_Os02g17600	584.576	33.4021	4.1294	2.24e-15	5.73e-13	galactoside 2-alpha-L-fucosyltransferase, putative, expressed
LOC_Os02g18000	1603.7	459.765	1.8024	7.8e-05	0.0015908	disease resistance protein RGA2, putative, expressed
LOC_Os02g18070	3511.88	1116.06	1.6538	0.0003038	0.0049897	NB-ARC domain containing protein, expressed
LOC_Os02g18080	1842.06	715.482	1.3643	0.0028767	0.029926	NB-ARC domain containing protein, expressed
LOC_Os02g18115	123.733	31.9513	1.9533	0.00023696	0.0040781	expressed protein
LOC_Os02g18140	432.723	153.403	1.4961	0.0010866	0.013837	NBS type disease resistance protein, putative, expressed
LOC_Os02g18180	1399.24	295.982	2.2411	3.31e-06	0.00010722	ATP-binding cassette sub-family E member 1, putative, expressed
LOC_Os02g18510	56.6538	8.68615	2.7054	3.16e-05	0.00074081	stripe rust resistance protein Yr10, putative, expressed
LOC_Os02g18640	520.174	124.857	2.0587	1.25e-05	0.00033334	OsFBX45 - F-box domain containing protein, expressed
LOC_Os02g19530	281.727	52.1192	2.4344	1.27e-06	4.7e-05	lectin-like receptor kinase, putative, expressed
LOC_Os02g19570	17.0197	0	Inf	0.0011586	0.014577	retrotransposon, putative, centromere-specific, expressed
LOC_Os02g19620	65.8877	0.320802	7.6822	0.0033075	0.033435	retrotransposon protein, putative, unclassified, expressed
LOC_Os02g19680	71.0665	0	Inf	0.00010412	0.0020483	expressed protein
LOC_Os02g19770	2198.83	920.052	1.2569	0.0042771	0.040914	eukaryotic translation initiation factor 1A, putative, expressed
LOC_Os02g20000	83.8355	24.2928	1.787	0.0011514	0.014515	expressed protein
LOC_Os02g20970	2724.92	445.678	2.6121	2.24e-06	7.63e-05	C2 domain containing protein, putative, expressed
LOC_Os02g21040	9345.91	607.287	3.9439	2.41e-06	8.15e-05	aspartic proteinase nepenthesin precursor, putative, expressed
LOC_Os02g22020	161.498	35.2651	2.1952	0.00080792	0.011006	MYB family transcription factor, putative, expressed
LOC_Os02g22130	8737.21	1379.01	2.6635	7.85e-09	5.25e-07	expressed protein
LOC_Os02g22160	483.225	26.2877	4.2002	1e-07	5.1e-06	DNA binding protein, putative, expressed
LOC_Os02g22380	1944.37	694.7	1.4848	0.00084849	0.011426	glycosyltransferase protein, putative, expressed
LOC_Os02g22650	617.489	172.044	1.8436	0.0013356	0.016389	glycosyltransferase, putative, expressed
LOC_Os02g24080	5794.76	1427.9	2.0209	8.46e-06	0.00024087	SNARE domain containing protein, putative, expressed
LOC_Os02g25080	820.745	316.748	1.3736	0.0023208	0.025486	expressed protein
LOC_Os02g25780	813.052	205.232	1.9861	1.39e-05	0.00036464	expressed protein
LOC_Os02g26404	1015.26	395.881	1.3587	0.0026135	0.027906	expressed protein
LOC_Os02g26430	206.686	18.2305	3.503	1.9e-10	1.8e-08	WRKY42, expressed
LOC_Os02g26794	11.1047	0	Inf	0.00029428	0.0048542	expressed protein
LOC_Os02g26810	9.22923	0.320802	4.8465	0.0044482	0.042243	cytochrome P450, putative, expressed
LOC_Os02g26840	47.6669	3.54742	3.7481	0.00026868	0.0045111	O-acyltransferase, putative, expressed
LOC_Os02g27360	944.009	306.079	1.6249	0.00099165	0.012885	aspartic proteinase-like protein 2 precursor, putative, expressed
LOC_Os02g28170	72.5559	23.7858	1.609	0.0032665	0.033123	transferase family protein, putative, expressed
LOC_Os02g28220	21.5674	0	Inf	0.0047849	0.044727	transferase family protein, putative, expressed
LOC_Os02g28720	1571.35	556.99	1.4963	0.00090718	0.012027	spotted leaf 11, putative, expressed
LOC_Os02g29150	34.3239	6.59885	2.3789	0.001028	0.013227	OsFBO11 - F-box and other domain containing protein, expressed
LOC_Os02g29450	167.008	0.937003	7.4777	5.73e-12	7.45e-10	expressed protein
LOC_Os02g30370	34.3107	0	Inf	6.8e-10	5.75e-08	transposon protein, putative, CACTA, En/Spm sub-class, expressed
LOC_Os02g30900	1274.32	507.675	1.3278	0.003012	0.031072	protein kinase domain containing protein, expressed
LOC_Os02g31080	2283.97	547.65	2.0602	5.99e-05	0.0012711	hydroxyproline-rich glycoprotein family protein, putative, expressed
LOC_Os02g31867	5191.74	1613.37	1.6861	0.00017649	0.0031846	expressed protein
LOC_Os02g32140	335.252	23.1306	3.8574	0.00012615	0.0024126	AP2 domain containing protein, expressed
LOC_Os02g32270	10.5823	0	Inf	0.00045543	0.0069566	expressed protein
LOC_Os02g32320	109.186	0	Inf	0.001834	0.021106	expressed protein
LOC_Os02g32370	1290.82	274.447	2.2337	1.56e-06	5.57e-05	inositol hexaphosphate kinase, putative, expressed
LOC_Os02g32490	3394.66	875.876	1.9545	1.26e-05	0.00033528	AMP-binding enzyme, putative, expressed
LOC_Os02g32520	11281.3	1361.65	3.0505	1.42e-10	1.39e-08	ERD1 protein, chloroplast precursor, putative, expressed
LOC_Os02g32620	811.423	317.254	1.3548	0.0027238	0.028678	PAN domain-containing protein At5g03700 precursor, putative, expressed
LOC_Os02g32690	1180.42	155.352	2.9257	0.0039125	0.038148	pleiotropic drug resistance protein 15, putative, expressed
LOC_Os02g32770	67.9409	1.55321	5.451	4.85e-05	0.0010596	cytochrome P450, putative, expressed
LOC_Os02g32840	324.623	8.75556	5.2124	1.56e-09	1.19e-07	zinc finger A20 and AN1 domain-containing stress-associated protein, putative, expressed
LOC_Os02g33110	19409.9	5115.07	1.924	0.00022759	0.003951	glycosyl hydrolases, putative, expressed
LOC_Os02g33330	5384.43	537.037	3.3257	4.28e-07	1.81e-05	expressed protein
LOC_Os02g33560	653.582	61.9424	3.3994	0.00013138	0.0024967	expressed protein
LOC_Os02g33580	4650.34	1829.32	1.346	0.0025425	0.027332	digalactosyldiacylglycerol synthase, chloroplast precursor, putative, expressed
LOC_Os02g33590	45.2249	4.65962	3.2788	1.03e-05	0.00028473	U-box domain-containing protein, putative, expressed
LOC_Os02g33670	56.809	1.59131	5.1578	3.1e-05	0.00072689	expressed protein
LOC_Os02g33820	11397.6	2099.79	2.4404	0.00028023	0.0046568	abscisic stress-ripening, putative, expressed
LOC_Os02g34650	947.273	174.74	2.4386	2.04e-07	9.47e-06	expressed protein
LOC_Os02g34790	62.0346	4.21443	3.8797	0.0027406	0.028787	receptor-like protein kinase 5 precursor, putative, expressed
LOC_Os02g34800	24.7717	3.24862	2.9308	0.00066452	0.0093702	leucine-rich repeat receptor protein kinase EXS precursor, putative, expressed
LOC_Os02g34940	374.55	65.8741	2.5074	1.86e-07	8.7e-06	OsPDIL1-3 protein disulfide isomerase PDIL1-3, expressed
LOC_Os02g35010	6516.44	1182.18	2.4626	0.00024421	0.0041707	STE_MEKK_ste11_MAP3K.9 - STE kinases include homologs to sterile 7, sterile 11 and sterile 20 from yeast, expressed
LOC_Os02g35020	151.612	7.8211	4.2769	8.48e-07	3.32e-05	glycosyl transferase, putative, expressed
LOC_Os02g35210	1023.44	164.844	2.6342	2.79e-08	1.62e-06	resistance protein, putative, expressed
LOC_Os02g35490	2675.05	79.1267	5.0793	2.05e-07	9.49e-06	MLO domain containing protein, putative, expressed
LOC_Os02g35940	127.048	33.2337	1.9347	0.00020556	0.0036106	gibberellin receptor GID1L2, putative, expressed
LOC_Os02g36030	1271.62	61.3186	4.3742	0.00068093	0.0095607	cytochrome P450, putative, expressed
LOC_Os02g36070	5453.06	45.5461	6.9036	9.06e-08	4.67e-06	cytochrome P450, putative, expressed
LOC_Os02g36110	1140.26	39.0597	4.8675	1.72e-06	6.07e-05	cytochrome P450, putative, expressed
LOC_Os02g36140	3793.93	10.5441	8.4911	2.41e-08	1.42e-06	terpene synthase, putative, expressed
LOC_Os02g36190	6472.26	153.528	5.3977	1.12e-12	1.7e-10	cytochrome P450, putative, expressed
LOC_Os02g36280	3737.55	70.5151	5.728	1.13e-05	0.0003066	cytochrome P450, putative, expressed
LOC_Os02g36285	41.8614	0.641604	6.0278	0.00032727	0.0053198	terpene synthase family, metal binding domain containing protein, expressed
LOC_Os02g36320	109.877	0.924303	6.8933	6.73e-11	7.1e-09	RING-H2 finger protein ATL3B precursor, putative, expressed
LOC_Os02g36330	2395.31	305.195	2.9724	2.99e-10	2.7e-08	RING-H2 finger protein ATL1O, putative, expressed
LOC_Os02g36340	1951.93	685.449	1.5098	0.0012692	0.015687	riboflavin biosynthesis protein ribAB, chloroplast precursor, putative, expressed
LOC_Os02g36530	1776.37	101.271	4.1326	6.06e-06	0.00017962	expressed protein
LOC_Os02g36590	446.877	131.709	1.7625	0.00018603	0.0033299	CPuORF19 - conserved peptide uORF-containing transcript, expressed
LOC_Os02g36619	1070	42.4549	4.6555	0.00023088	0.0039946	exo70 exocyst complex subunit, putative, expressed
LOC_Os02g36840	730.16	90.9219	3.0055	6.15e-10	5.23e-08	cytokinin-O-glucosyltransferase 2, putative, expressed
LOC_Os02g36845	23.1122	0	Inf	3.61e-07	1.56e-05	membrane associated DUF588 domain containing protein, putative, expressed
LOC_Os02g37000	1552.22	362.665	2.0976	4.16e-06	0.00013072	mitochondrial prohibitin complex protein 1, putative, expressed
LOC_Os02g37160	6689.87	403.351	4.0519	1.05e-16	3.63e-14	heavy metal transport/detoxification protein, putative, expressed
LOC_Os02g37170	12.6087	0	Inf	0.0001135	0.0022146	expressed protein
LOC_Os02g37180	3291.39	26.1016	6.9784	3.3e-15	8.08e-13	expressed protein
LOC_Os02g37280	1633.84	131.509	3.635	4.39e-12	5.89e-10	heavy metal transport/detoxification protein, putative, expressed
LOC_Os02g37300	2403.8	332.329	2.8546	0.00025654	0.0043419	heavy metal associated domain containing protein, expressed
LOC_Os02g38000	11.4126	0.308101	5.2111	0.0021795	0.024228	retrotransposon protein, putative, unclassified, expressed
LOC_Os02g38230	22.3771	0.308101	6.1825	2.13e-06	7.3e-05	high affinity nitrate transporter, putative, expressed
LOC_Os02g38386	333.1	97.1252	1.778	0.00019644	0.0034762	NBS-LRR disease resistance protein, putative, expressed
LOC_Os02g38392	1269.62	329.97	1.944	2.08e-05	0.00051626	NBS-LRR disease resistance protein, putative, expressed
LOC_Os02g38840	1351	448.152	1.592	0.00047004	0.0071253	glucose-6-phosphate 1-dehydrogenase, cytoplasmic isoform, putative, expressed
LOC_Os02g39400	1835.17	695.992	1.3988	0.001772	0.020518	isochorismatase family protein, putative, expressed
LOC_Os02g39850	26509.7	5260.49	2.3333	0.00096567	0.01263	transferase family protein, putative, expressed
LOC_Os02g39884	2376.73	83.6609	4.8283	4.34e-13	7.12e-11	expressed protein
LOC_Os02g40010	636.014	112.025	2.5052	0.0033396	0.033693	phosphoribosyl transferase, putative, expressed
LOC_Os02g40090	2822.49	1178.74	1.2597	0.0046061	0.043385	transporter-related, putative, expressed
LOC_Os02g40120	92.2193	10.451	3.1414	1.61e-05	0.00041241	expressed protein
LOC_Os02g40190	261.766	24.6566	3.4082	5.71e-10	4.93e-08	receptor kinase, putative, expressed
LOC_Os02g40784	758.198	168.945	2.166	4.18e-06	0.00013117	WAX2, putative, expressed
LOC_Os02g40800	30.0803	2.02892	3.89	9.36e-06	0.00026273	expressed protein
LOC_Os02g41510	361.114	12.6644	4.8336	1.77e-07	8.36e-06	MYB family transcription factor, putative, expressed
LOC_Os02g41840	89.219	13.2933	2.7466	0.00058616	0.0084827	DUF584 domain containing protein, putative, expressed
LOC_Os02g42000	196.039	18.8197	3.3808	5.25e-10	4.61e-08	expressed protein
LOC_Os02g42440	2148.91	734.616	1.5485	0.00050509	0.0075321	GEM, putative, expressed
LOC_Os02g42740	151.419	11.6088	3.7053	0.0022517	0.024864	cytochrome b5-like Heme/Steroid binding domain containing protein, expressed
LOC_Os02g42780	488.188	0.628903	9.6004	4.43e-11	4.89e-09	lectin receptor-type protein kinase, putative, expressed
LOC_Os02g43290	149.884	43.5476	1.7832	0.00030653	0.0050238	protein kinase domain containing protein, expressed
LOC_Os02g43360	9307.6	586.301	3.9887	3.74e-05	0.00085294	cytochrome b5-like Heme/Steroid binding domain containing protein, expressed
LOC_Os02g43430	1348.66	232.412	2.5368	1.45e-07	7.07e-06	protein kinase domain containing protein, expressed
LOC_Os02g43690	2038.51	821.935	1.3104	0.003456	0.034565	ras-related protein, putative, expressed
LOC_Os02g43790	6838.15	543.953	3.6521	0.0052538	0.047944	ethylene-responsive transcription factor, putative, expressed
LOC_Os02g44000	381.581	130.058	1.5528	0.00089347	0.011881	amino acid kinase, putative, expressed
LOC_Os02g44530	64.1499	2.61042	4.6191	3.51e-08	1.98e-06	expressed protein
LOC_Os02g44590	493.132	19.2819	4.6767	3.23e-18	1.42e-15	OsSub20 - Putative Subtilisin homologue, expressed
LOC_Os02g44610	4001.77	654.187	2.6129	7.03e-07	2.82e-05	protein kinase, putative, expressed
LOC_Os02g44880	741.328	120.214	2.6245	4.22e-05	0.00094092	expressed protein
LOC_Os02g44990	649.51	84.368	2.9446	0.00016987	0.0030885	OsFBDUF13 - F-box and DUF domain containing protein, expressed
LOC_Os02g45040	635.948	69.6925	3.1898	8.96e-05	0.0017977	retrotransposon protein, putative, unclassified, expressed
LOC_Os02g45100	264.068	13.4795	4.2921	2.66e-14	5.45e-12	mitochondrial import inner membrane translocase subunit Tim17, putative, expressed
LOC_Os02g45610	69.853	9.36836	2.8985	6.55e-05	0.0013706	expressed protein
LOC_Os02g45620	661.152	2.92782	7.819	6.46e-12	8.22e-10	DUF623 domain containing protein, expressed
LOC_Os02g45750	3387.79	1138.11	1.5737	0.00042505	0.0065972	protein kinase domain containing protein, expressed
LOC_Os02g45760	735.313	265.494	1.4697	0.0012623	0.015618	chitin-inducible gibberellin-responsive protein 2, putative, expressed
LOC_Os02g45780	58.8656	4.54113	3.6963	0.0001177	0.0022791	zinc finger, C3HC4 type domain containing protein, expressed
LOC_Os02g45810	1019.28	241.56	2.0771	7.43e-06	0.00021558	WD domain, G-beta repeat domain containing protein, expressed
LOC_Os02g46420	7641.57	2126.99	1.8451	0.00057079	0.0082926	transposon protein, putative, unclassified, expressed
LOC_Os02g46480	1457.74	393.004	1.8911	3.03e-05	0.00071388	expressed protein
LOC_Os02g46500	24.9761	0	Inf	7.14e-08	3.75e-06	U-box, putative, expressed
LOC_Os02g46650	1060.26	143.825	2.882	1.42e-08	8.98e-07	ubiquitin carboxyl-terminal hydrolase domain containing protein, expressed
LOC_Os02g46690	63.08	19.9327	1.662	0.0044129	0.041986	OsFBD8 - F-box and FBD domain containing protein, expressed
LOC_Os02g46780	46.4754	2.31162	4.3295	6.04e-08	3.2e-06	MYB family transcription factor, putative, expressed
LOC_Os02g47090	326.23	10.341	4.9794	3.65e-09	2.62e-07	peptide transporter PTR2, putative, expressed
LOC_Os02g47100	53.8415	2.41913	4.4762	0.00053492	0.0078784	expressed protein
LOC_Os02g47650	4966.72	532.924	3.2203	0.0002996	0.0049306	universal stress protein domain containing protein, putative, expressed
LOC_Os02g47660	894.561	117.455	2.9291	0.00044486	0.0068453	basic helix-loop-helix, putative, expressed
LOC_Os02g47780	67.2207	6.68854	3.3291	4.28e-07	1.81e-05	hydrolase, alpha/beta fold family domain containing protein, expressed
LOC_Os02g48210	5577.8	299.921	4.217	4.05e-08	2.23e-06	lectin-like protein kinase, putative, expressed
LOC_Os02g48280	113.455	3.55082	4.9978	8.33e-05	0.0016842	expressed protein
LOC_Os02g48290	4520.61	1705.36	1.4064	0.001601	0.018969	thioredoxin reductase 2, putative, expressed
LOC_Os02g48320	347.127	23.2695	3.899	1.23e-13	2.18e-11	DNA binding protein, putative, expressed
LOC_Os02g48330	128.474	18.4117	2.8028	3.48e-07	1.51e-05	3-hydroxy-3-methylglutaryl-coenzyme A reductase, putative, expressed
LOC_Os02g48640	14540.9	3874.42	1.9081	1.85e-05	0.00046616	expressed protein
LOC_Os02g48860	486.922	178.915	1.4444	0.0023179	0.025462	aspartic proteinase nepenthesin-2 precursor, putative, expressed
LOC_Os02g49480	3544.49	118.911	4.8976	1e-14	2.18e-12	helix-loop-helix DNA-binding domain containing protein, expressed
LOC_Os02g49650	283.448	105.751	1.4224	0.0019224	0.021866	leaf senescence related protein, putative, expressed
LOC_Os02g50060	204.09	25.631	2.9932	1.47e-07	7.17e-06	OsCML20 - Calmodulin-related calcium sensor protein, expressed
LOC_Os02g50450	2541.45	22.5989	6.8133	3.68e-05	0.00084171	hypothetical protein
LOC_Os02g50460	2979.36	313.421	3.2488	4.55e-05	0.0010014	immediate-early fungal elicitor protein CMPG1, putative, expressed
LOC_Os02g50470	3828.61	447.414	3.0971	2.75e-10	2.49e-08	expressed protein
LOC_Os02g50490	2625.48	353.801	2.8916	3.88e-08	2.15e-06	endoglucanase, putative, expressed
LOC_Os02g50570	4680.67	1297.04	1.8515	3.81e-05	0.00086609	retrotransposon protein, putative, unclassified, expressed
LOC_Os02g50600	4676.72	121.503	5.2664	1.82e-07	8.55e-06	glycosyl transferase 8 domain containing protein, putative, expressed
LOC_Os02g50710	1025.55	111.827	3.1971	0.00018343	0.0032915	expressed protein
LOC_Os02g50730	2129.82	169.154	3.6543	7.52e-08	3.94e-06	metalloendoproteinase 1 precursor, putative, expressed
LOC_Os02g50940	666.336	102.793	2.6965	5.19e-05	0.0011253	NHL repeat-containing protein, putative, expressed
LOC_Os02g50960	639.317	248.314	1.3644	0.0017903	0.020697	auxin efflux carrier component, putative, expressed
LOC_Os02g51350	1530.85	251.549	2.6054	5.62e-08	2.99e-06	OsFBK10 - F-box domain and kelch repeat containing protein, expressed
LOC_Os02g51890	787.714	28.1416	4.8069	2.26e-11	2.61e-09	RNA recognition motif containing protein, putative, expressed
LOC_Os02g52170	1006.05	41.6767	4.5933	9.08e-06	0.00025665	expressed protein
LOC_Os02g52540	29.0563	0.355505	6.3528	0.0027357	0.028753	EF hand family protein, putative, expressed
LOC_Os02g52560	1769.6	657.697	1.4279	0.0013252	0.016289	xyloglucan fucosyltransferase, putative, expressed
LOC_Os02g53040	157.666	49.8713	1.6606	0.00092916	0.012251	STE_MEKK_ste11_MAP3K.11 - STE kinases include homologs to sterile 7, sterile 11 and sterile 20 from yeast, expressed
LOC_Os02g53100	1391.23	12.154	6.8388	9.86e-07	3.79e-05	WRKY32, expressed
LOC_Os02g53160	85.47	5.52386	3.9517	0.0029093	0.030187	tyrosine phosphatase family protein, putative, expressed
LOC_Os02g53250	44.4864	0	Inf	0.00028562	0.0047354	expressed protein
LOC_Os02g53410	176.806	47.6561	1.8914	0.00016871	0.0030721	expressed protein
LOC_Os02g54160	7936.54	2006.74	1.9837	2.99e-05	0.00070561	AP2 domain containing protein, expressed
LOC_Os02g54600	3282.53	982.743	1.7399	0.00045343	0.0069354	STE_MEK_ste7_MAP2K.5 - STE kinases include homologs to sterile 7, sterile 11 and sterile 20 from yeast, expressed
LOC_Os02g54890	2716.75	138.707	4.2918	1.12e-07	5.65e-06	UDP-glucuronate 4-epimerase, putative, expressed
LOC_Os02g55070	168.867	22.2477	2.9242	0.0025527	0.027418	expressed protein
LOC_Os02g55190	20.6505	0	Inf	7.91e-07	3.14e-05	expressed protein
LOC_Os02g55920	3273.64	767.304	2.093	3.62e-06	0.00011589	expressed protein
LOC_Os02g55970	437.654	114.63	1.9328	4.4e-05	0.00097514	ANTH, putative, expressed
LOC_Os02g56310	6780.39	452.21	3.9063	1.35e-12	2.03e-10	calcium-dependent protein kinase isoform AK1, putative, expressed
LOC_Os02g56334	554.538	224.402	1.3052	0.0034779	0.034745	OsWAK18b - OsWAK short gene, expressed
LOC_Os02g56370	681.796	72.3176	3.2369	7.76e-11	8.02e-09	OsWAK20 - OsWAK receptor-like protein kinase, expressed
LOC_Os02g56460	14.4728	0.924303	3.9688	0.003769	0.037113	dehydrogenase, putative, expressed
LOC_Os02g56570	40.8581	10.1742	2.0057	0.0038807	0.037942	TBC domain containing protein, expressed
LOC_Os02g56850	7379.74	2931.05	1.3322	0.0026027	0.027871	glutathione reductase, putative, expressed
LOC_Os03g01300	6091.6	397.908	3.9363	0.0044215	0.042045	LTPL114 - Protease inhibitor/seed storage/LTP family protein precursor, expressed
LOC_Os03g01320	7007.73	289.627	4.5967	0.00083028	0.011225	LTPL116 - Protease inhibitor/seed storage/LTP family protein precursor, expressed
LOC_Os03g01840	311.167	87.7205	1.8267	0.00013066	0.0024856	knotted 1-binding protein 36, putative, expressed
LOC_Os03g02230	21.7456	0.924303	4.5562	0.00012544	0.0024029	expressed protein
LOC_Os03g02300	253.609	12.3072	4.365	1.16e-08	7.49e-07	expressed protein
LOC_Os03g02330	2278.47	451.947	2.3338	3.05e-05	0.00071913	AAA-type ATPase family protein, putative, expressed
LOC_Os03g02390	861.565	326.258	1.4009	0.0022669	0.025002	mitochondrial import inner membrane translocase subunit Tim17, putative, expressed
LOC_Os03g02460	152.687	1.94341	6.2958	1.58e-18	7.42e-16	retinol dehydrogenase, putative, expressed
LOC_Os03g02470	3520.46	27.0539	7.0238	3.84e-25	7.62e-22	expressed protein
LOC_Os03g02514	4401.4	1086.25	2.0186	1.2e-05	0.00032105	hydrolase, alpha/beta fold family protein, putative, expressed
LOC_Os03g02874	224.527	10.6211	4.4019	9.75e-07	3.76e-05	retrotransposon protein, putative, Ty3-gypsy subclass, expressed
LOC_Os03g03034	2036.95	154.683	3.719	0.00016123	0.0029676	flavonol synthase/flavanone 3-hydroxylase, putative, expressed
LOC_Os03g03200	1787.84	521.52	1.7774	0.00024593	0.0041901	hydrolase, alpha/beta fold family protein, putative, expressed
LOC_Os03g03260	4984.49	2135.09	1.2231	0.005071	0.046657	homeobox domain containing protein, expressed
LOC_Os03g03280	1669.91	435.406	1.9393	0.0023051	0.025353	TKL_IRAK_CrRLK1L-1.6 - The CrRLK1L-1 subfamily has homology to the CrRLK1L homolog, expressed
LOC_Os03g03300	30.4222	4.54113	2.744	0.00050922	0.0075778	hypothetical protein
LOC_Os03g03510	1129.73	455.097	1.3117	0.0032166	0.03272	CAMK_KIN1/SNF1/Nim1_like.15 - CAMK includes calcium/calmodulin depedent protein kinases, expressed
LOC_Os03g03680	81.731	13.532	2.5945	0.0030657	0.031508	transporter family protein, putative, expressed
LOC_Os03g03730	1663.79	576.696	1.5286	0.0005295	0.0078139	regulatory protein, putative, expressed
LOC_Os03g03740	77.5655	12.1811	2.6708	0.0020393	0.022959	retrotransposon protein, putative, unclassified, expressed
LOC_Os03g03750	270.713	94.1417	1.5239	0.0011519	0.014515	expressed protein
LOC_Os03g03790	3443.83	365.733	3.2352	5.66e-12	7.39e-10	AMP-binding domain containing protein, expressed
LOC_Os03g03890	1006.68	161.666	2.6385	4.66e-06	0.00014398	protein kinase family protein, putative, expressed
LOC_Os03g04070	2762.88	886.234	1.6404	0.00029613	0.0048779	no apical meristem protein, putative, expressed
LOC_Os03g04370	2420.07	200.17	3.5957	1.16e-08	7.49e-07	protein-methionine-S-oxide reductase, putative, expressed
LOC_Os03g04560	137.155	37.5049	1.8707	0.00027836	0.0046323	expressed protein
LOC_Os03g04890	190.824	4.50643	5.4041	1.16e-05	0.00031267	zinc finger family protein, putative, expressed
LOC_Os03g05520	813.467	38.3571	4.4065	5.68e-10	4.92e-08	nicotiana lesion-inducing like, putative, expressed
LOC_Os03g05620	15783.9	3078.88	2.358	2.27e-07	1.04e-05	inorganic phosphate transporter, putative, expressed
LOC_Os03g05700	18.8851	1.84861	3.3527	0.00094945	0.012459	expressed protein
LOC_Os03g05750	1068.45	177.523	2.5894	3.58e-08	2e-06	heavy-metal-associated domain-containing protein, putative, expressed
LOC_Os03g05780	3727.46	1254.09	1.5716	0.00035572	0.0056954	4-coumarate--CoA ligase-like 7, putative, expressed
LOC_Os03g06090	564.631	216.429	1.3834	0.002971	0.03072	high-affinity nickel-transport family protein, putative, expressed
LOC_Os03g06290	542.905	232.077	1.2261	0.0051274	0.047091	OsSub27 - Putative Subtilisin homologue, expressed
LOC_Os03g06750	74.6512	16.9609	2.138	0.00021125	0.0036925	expressed protein
LOC_Os03g07170	8.62783	0	Inf	0.0015857	0.018837	lactose permease-related, putative, expressed
LOC_Os03g07200	653.448	4.13655	7.3035	9.32e-16	2.64e-13	expressed protein
LOC_Os03g07400	180.741	27.3958	2.7219	0.00014217	0.0026719	expressed protein
LOC_Os03g07530	3189.58	1368.72	1.2205	0.0055079	0.04963	OsFBK12 - F-box domain and kelch repeat containing protein, expressed
LOC_Os03g07870	1288.63	496.017	1.3774	0.001948	0.022084	expressed protein
LOC_Os03g07930	19.577	1.61331	3.6011	0.00042446	0.006591	retrotransposon protein, putative, Ty3-gypsy subclass, expressed
LOC_Os03g08170	2535.74	365.34	2.7951	3.05e-07	1.34e-05	protein kinase APK1B, chloroplast precursor, putative, expressed
LOC_Os03g08220	7528.74	2049.33	1.8773	0.00015966	0.0029418	lipoxygenase protein, putative, expressed
LOC_Os03g08310	30.9686	0.676307	5.517	0.00041098	0.0064066	ZIM domain containing protein, putative, expressed
LOC_Os03g08320	1341.62	23.1932	5.8541	1.54e-05	0.00039897	ZIM domain containing protein, putative, expressed
LOC_Os03g08330	577.344	100.141	2.5274	0.0012901	0.015901	ZIM domain containing protein, putative, expressed
LOC_Os03g08410	55.8211	2.15671	4.6939	0.00016951	0.0030851	flavin-containing monooxygenase family protein, putative, expressed
LOC_Os03g08460	1430.13	152.344	3.2307	1.66e-11	1.99e-09	AP2 domain containing protein, expressed
LOC_Os03g08860	3766.43	918.188	2.0363	8.18e-06	0.00023403	GRAM domain containing protein, expressed
LOC_Os03g08870	723.615	290.826	1.3151	0.0036243	0.035986	expressed protein
LOC_Os03g08880	16.1022	0	Inf	5.28e-05	0.0011418	purine permease, putative, expressed
LOC_Os03g08920	17.892	2.46481	2.8598	0.0037418	0.036887	Zinc finger, C3HC4 type domain containing protein, expressed
LOC_Os03g08940	323.243	19.9598	4.0175	0.00050064	0.0074803	expressed protein
LOC_Os03g08960	422.601	164.267	1.3633	0.0027336	0.028748	homeobox associated leucine zipper, putative, expressed
LOC_Os03g08999	1446.73	567.612	1.3498	0.0026062	0.027885	dehydrogenase, putative, expressed
LOC_Os03g09140	774.378	218.942	1.8225	8.28e-05	0.0016769	ras-related protein, putative, expressed
LOC_Os03g09250	1206.65	261.847	2.2042	2.28e-06	7.73e-05	inositol-3-phosphate synthase, putative, expressed
LOC_Os03g09880	965.682	111.141	3.1192	7.27e-09	4.89e-07	AIR12, putative, expressed
LOC_Os03g09900	9960.16	1784.39	2.4807	0.00028715	0.0047586	membrane protein, putative, expressed
LOC_Os03g10100	5962.72	1436.01	2.0539	5.3e-06	0.00016046	transporter family protein, putative, expressed
LOC_Os03g10150	39.4018	4.36422	3.1745	3.53e-05	0.00081429	DUF623 domain containing protein, expressed
LOC_Os03g10320	179.061	32.0132	2.4837	1.3e-06	4.77e-05	expressed protein
LOC_Os03g10390	236.654	39.0978	2.5976	0.00023886	0.004099	expressed protein
LOC_Os03g10640	13648	106.358	7.0036	1.54e-10	1.49e-08	calcium-transporting ATPase, plasma membrane-type, putative, expressed
LOC_Os03g10710	69.1193	1.2451	5.7948	3.37e-12	4.62e-10	expressed protein
LOC_Os03g10740	71.9803	18.3169	1.9744	0.00059325	0.008568	expressed protein
LOC_Os03g10950	3918.7	549.119	2.8352	9.9e-10	8.03e-08	protein phosphatase 2C, putative, expressed
LOC_Os03g11040	114.555	37.3346	1.6175	0.0032682	0.033132	cyclin, putative, expressed
LOC_Os03g11220	4100.7	1496.81	1.454	0.0012603	0.015611	keratin, type I cytoskeletal 9, putative, expressed
LOC_Os03g11590	2547.57	590.158	2.11	3.89e-06	0.00012348	integral membrane protein, putative, expressed
LOC_Os03g11900	47725.8	3828.75	3.6398	3.8e-14	7.63e-12	transporter family protein, putative, expressed
LOC_Os03g12290	1796.13	549.316	1.7092	0.0024846	0.026832	glutamine synthetase, catalytic domain containing protein, expressed
LOC_Os03g12470	2274.51	608.023	1.9034	0.00030743	0.0050339	OsWAK25 - OsWAK receptor-like protein kinase, expressed
LOC_Os03g12500	6936.88	6.84095	9.9859	1.39e-07	6.8e-06	cytochrome P450, putative, expressed
LOC_Os03g12510	26.0182	0.308101	6.4	0.0018559	0.021303	non-symbiotic hemoglobin 2, putative, expressed
LOC_Os03g12820	679.924	130.416	2.3823	1.25e-06	4.62e-05	ATP8, putative, expressed
LOC_Os03g12890	727.539	91.91	2.9847	0.00046793	0.0071054	aminotransferase domain containing protein, putative, expressed
LOC_Os03g13040	1043.43	298.569	1.8052	8.15e-05	0.0016529	haemolysin-III, putative, expressed
LOC_Os03g13210	502.592	2.06362	7.9281	4.29e-07	1.82e-05	peroxidase precursor, putative, expressed
LOC_Os03g13300	428.435	46.8272	3.1937	0.00092749	0.012242	glutamate decarboxylase, putative, expressed
LOC_Os03g13590	3066.52	1281.36	1.2589	0.0045193	0.042827	potyvirus VPg interacting protein, putative, expressed
LOC_Os03g13740	188.758	13.5743	3.7976	1.77e-05	0.00045066	immediate-early fungal elicitor protein CMPG1, putative, expressed
LOC_Os03g14370	1403.32	503.074	1.48	0.0010002	0.012972	ACT domain containing protein, expressed
LOC_Os03g14880	1581.64	434.282	1.8647	0.00029275	0.0048401	expressed protein
LOC_Os03g15020	610.699	211.481	1.5299	0.003398	0.034138	beta-galactosidase precursor, putative, expressed
LOC_Os03g15070	39.8942	2.46481	4.0166	1.19e-06	4.45e-05	expressed protein
LOC_Os03g15080	1913.96	133.404	3.8427	9.01e-15	1.99e-12	expressed protein
LOC_Os03g15260	108.24	0	Inf	6.93e-20	4.06e-17	expressed protein
LOC_Os03g15270	3031.52	90.0264	5.0735	5.28e-07	2.18e-05	gibberellin receptor GID1L2, putative, expressed
LOC_Os03g15370	63.6942	0.676307	6.5573	0.00073549	0.010166	ubiquitin fusion protein, putative, expressed
LOC_Os03g15720	3632.88	1378.71	1.3978	0.0024756	0.026766	expressed protein
LOC_Os03g15770	1706.12	543.374	1.6507	0.00024622	0.004193	tyrosine protein kinase domain containing protein, putative, expressed
LOC_Os03g15860	3141.43	478.714	2.7142	1.24e-06	4.6e-05	mitochondrial carrier protein, putative, expressed
LOC_Os03g16350	1590.94	65.385	4.6048	3.48e-07	1.51e-05	DNA binding protein, putative, expressed
LOC_Os03g16670	6198.53	295.278	4.3918	6.2e-14	1.14e-11	haloacid dehalogenase-like hydrolase family protein, putative, expressed
LOC_Os03g16700	2348.15	928.497	1.3386	0.0022893	0.025202	initiator-binding protein, putative, expressed
LOC_Os03g16740	1721.25	680.557	1.3387	0.0024901	0.026879	protein kinase APK1A, chloroplast precursor, putative, expressed
LOC_Os03g16760	59.984	0	Inf	3.13e-12	4.3e-10	protein phosphatase 2C, putative, expressed
LOC_Os03g16900	24.4968	0.320802	6.2548	5.94e-07	2.42e-05	rab GDP dissociation inhibitor alpha, putative, expressed
LOC_Os03g16940	20.007	1.99422	3.3266	0.0024071	0.026208	glyoxalase family protein, putative, expressed
LOC_Os03g17460	1170.44	51.5477	4.505	0.0001023	0.0020214	IN2-1 protein, putative, expressed
LOC_Os03g17480	95.9451	8.50834	3.4953	1.75e-08	1.07e-06	IN2-1 protein, putative, expressed
LOC_Os03g17550	165.94	36.1387	2.199	1.55e-05	0.00040054	serine/threonine-protein kinase, putative, expressed
LOC_Os03g17700	2306.27	230.189	3.3247	4.64e-12	6.17e-10	CGMC_MAPKCGMC_2_ERK.2 - CGMC includes CDA, MAPK, GSK3, and CLKC kinases, expressed
LOC_Os03g17870	153.133	8.09958	4.2408	0.0035231	0.035167	metallothionein, putative, expressed
LOC_Os03g17990	1073.86	398.025	1.4319	0.0014419	0.017418	Yip1 domain containing protein, expressed
LOC_Os03g18010	447.675	28.0882	3.9944	0.0014817	0.017839	phospholipase C, putative, expressed
LOC_Os03g18030	349.851	18.3982	4.2491	0.00012102	0.0023321	leucoanthocyanidin dioxygenase, putative, expressed
LOC_Os03g18150	2207.97	683.473	1.6918	0.00023877	0.004099	protein phosphatase 2C, putative, expressed
LOC_Os03g18310	1219.39	393.411	1.632	0.00026367	0.0044353	6PF-2-K/Fru-2,6-P2ASE liver isozyme, putative, expressed
LOC_Os03g18350	100.638	34.9503	1.5258	0.004071	0.039322	importin subunit beta, putative, expressed
LOC_Os03g18560	3638.08	1165.42	1.6423	0.00019952	0.0035184	DUF538 domain containing protein, putative, expressed
LOC_Os03g18740	4245.68	174.171	4.6074	0.00050683	0.0075518	oxidoreductase, short chain dehydrogenase/reductase family, putative, expressed
LOC_Os03g18779	1179.61	0.962405	10.259	1.41e-42	5.04e-38	expressed protein
LOC_Os03g18850	2286.11	41.6845	5.7772	0.00025981	0.0043868	pathogenesis-related Bet v I family protein, putative, expressed
LOC_Os03g18910	566.203	85.7304	2.7234	3.43e-06	0.00011051	COBRA-like protein 7 precursor, putative, expressed
LOC_Os03g19010	878.61	289.774	1.6003	0.00045494	0.0069555	peroxisomal biogenesis factor 11, putative, expressed
LOC_Os03g19070	121.032	10.4204	3.5379	1.46e-06	5.26e-05	long cell-linked locus protein, putative, expressed
LOC_Os03g19260	418.041	54.7788	2.932	0.00021331	0.0037249	expressed protein
LOC_Os03g19370	867.129	11.6529	6.2175	1.61e-06	5.71e-05	CPuORF4 - conserved peptide uORF-containing transcript, expressed
LOC_Os03g19400	1129.24	408.124	1.4683	0.001008	0.013052	expressed protein
LOC_Os03g19580	2981.9	1006.67	1.5666	0.00042439	0.006591	expressed protein
LOC_Os03g19700	341.953	49.8382	2.7785	2.49e-08	1.46e-06	plant protein of unknown function domain containing protein, expressed
LOC_Os03g20210	467.553	23.0917	4.3397	1.41e-15	3.81e-13	aspartic proteinase nepenthesin precursor, putative, expressed
LOC_Os03g20290	321.822	2.16941	7.2128	2.18e-14	4.55e-12	aspartic proteinase nepenthesin-1 precursor, putative, expressed
LOC_Os03g20330	8780.09	887.964	3.3057	8.88e-07	3.46e-05	VQ domain containing protein, putative, expressed
LOC_Os03g20370	11246.9	2965.77	1.923	2.53e-05	0.00061077	OsCam1-1 - Calmodulin, expressed
LOC_Os03g20550	817.511	106.717	2.9374	1.08e-09	8.6e-08	WRKY55, expressed
LOC_Os03g20600	2354.77	142.49	4.0467	4.89e-07	2.04e-05	expressed protein
LOC_Os03g20670	1254.7	431.498	1.5399	0.00065017	0.0092346	ELMO/CED-12 family protein, putative, expressed
LOC_Os03g20840	1606.3	151.676	3.4047	8.42e-08	4.36e-06	disease resistance RPP13-like protein 1, putative, expressed
LOC_Os03g20870	296.51	64.5673	2.1992	0.00072288	0.010037	zinc finger, C3HC4 type domain containing protein, expressed
LOC_Os03g20949	5080.75	849.843	2.5798	1.54e-05	0.00039897	phospholipid-transporting ATPase, putative, expressed
LOC_Os03g20970	1497.09	172.368	3.1186	1.13e-06	4.24e-05	phospholipid-transporting ATPase 1, putative, expressed
LOC_Os03g21030	4870.48	1239.13	1.9747	8.29e-06	0.00023656	no apical meristem protein, putative, expressed
LOC_Os03g21380	2640.58	290.193	3.1858	5.54e-07	2.28e-05	OsCML27 - Calmodulin-related calcium sensor protein, expressed
LOC_Os03g21640	1416.14	361.745	1.9689	1.56e-05	0.00040283	expressed protein
LOC_Os03g21700	157.584	0.616202	7.9985	1.58e-21	1.2e-18	DNA-binding protein, putative, expressed
LOC_Os03g21710	8868.69	126.593	6.1305	2.16e-14	4.55e-12	WRKY79, expressed
LOC_Os03g21840	550.107	173.071	1.6683	0.00035103	0.0056293	reticulon domain containing protein, putative, expressed
LOC_Os03g21950	1919.84	689.538	1.4773	0.00097276	0.012689	fumarate hydratase, mitochondrial precursor, putative, expressed
LOC_Os03g22170	19.2371	0	Inf	1.76e-06	6.16e-05	AP2 domain containing protein, expressed
LOC_Os03g22360	146.636	5.97585	4.6169	1.49e-06	5.36e-05	expressed protein
LOC_Os03g24040	493.755	106.712	2.2101	3.55e-06	0.00011412	seven in absentia protein family domain containing protein, expressed
LOC_Os03g24100	876.846	162.867	2.4286	1.01e-06	3.85e-05	expressed protein
LOC_Os03g24130	83.9116	0.641604	7.031	0.00061449	0.0088283	CXXC1 - Cysteine-rich protein with CXXC and CXXXC motifs precursor, putative, expressed
LOC_Os03g24820	11.6023	0	Inf	0.0023243	0.025516	expressed protein
LOC_Os03g24930	54210.4	20923.7	1.3734	0.0020361	0.022938	tyrosine protein kinase domain containing protein, putative, expressed
LOC_Os03g25040	76.1276	0	Inf	0.0034284	0.034337	GDSL-like lipase/acylhydrolase, putative, expressed
LOC_Os03g25690	34.5418	6.82485	2.3395	0.0019307	0.021944	expressed protein
LOC_Os03g25750	1701.48	216.981	2.9712	3.78e-05	0.00086212	SNARE associated Golgi protein, putative, expressed
LOC_Os03g25760	80.0814	1.55321	5.6881	5.79e-13	9.24e-11	calmodulin-binding protein, putative, expressed
LOC_Os03g25920	2423.28	793.266	1.6111	0.00074086	0.010229	amino acid permease family protein, putative, expressed
LOC_Os03g26830	35.7205	0.320802	6.7989	1.88e-05	0.00047205	expressed protein
LOC_Os03g26870	981.742	364.761	1.4284	0.0013851	0.016892	WD-40 repeat family protein, putative, expressed
LOC_Os03g26910	5407.11	42.3802	6.9953	1.86e-06	6.46e-05	uncharacterized glycosyl hydrolase Rv2006/MT2062, putative, expressed
LOC_Os03g26990	73.8614	10.3977	2.8286	4.63e-06	0.00014319	VQ domain containing protein, putative, expressed
LOC_Os03g27760	297.766	73.8779	2.011	3.65e-05	0.00083676	nodulation protein-related, putative, expressed
LOC_Os03g27800	1522.45	576.817	1.4002	0.0017367	0.020253	paramyosin, putative, expressed
LOC_Os03g27960	1016.9	308.755	1.7196	0.0001813	0.0032567	sodium/calcium exchanger protein, putative, expressed
LOC_Os03g28330	1543.62	317.722	2.2805	1.13e-05	0.00030632	sucrose synthase, putative, expressed
LOC_Os03g29190	2931.33	913.181	1.6826	0.00011757	0.0022779	PDI, putative, expressed
LOC_Os03g29240	5821.21	427.231	3.7682	1.62e-06	5.73e-05	PDI, putative, expressed
LOC_Os03g29250	137.151	2.84571	5.5908	4.72e-05	0.0010331	SPX domain-containing protein, putative, expressed
LOC_Os03g29410	5038.44	248.435	4.342	4.01e-05	0.00090441	tyrosine protein kinase domain containing protein, putative, expressed
LOC_Os03g30130	1034.55	39.5031	4.7109	2.98e-05	0.00070354	phospholipase C, putative, expressed
LOC_Os03g30150	18.7448	1.01911	4.2011	0.00014711	0.002746	expressed protein
LOC_Os03g30790	2280.01	944.186	1.2719	0.0047324	0.044329	erlin-2 precursor, putative, expressed
LOC_Os03g30800	154.481	10.8649	3.8297	5.25e-11	5.66e-09	fumarylacetoacetate hydrolase family protein, expressed
LOC_Os03g30950	591.754	2.50291	7.8852	5.15e-09	3.57e-07	acyl-desaturase, chloroplast precursor, putative, expressed
LOC_Os03g31740	719.42	162.73	2.1444	4.59e-06	0.00014247	ZCF37, putative, expressed
LOC_Os03g32230	63.6122	0.663606	6.5828	0.00045187	0.0069204	ZOS3-12 - C2H2 zinc finger protein, expressed
LOC_Os03g32420	322.925	70.101	2.2037	0.00098828	0.01285	expressed protein
LOC_Os03g32580	17510.6	6115.96	1.5176	0.00073365	0.010149	BRASSINOSTEROID INSENSITIVE 1-associated receptor kinase 1 precursor, putative, expressed
LOC_Os03g33090	208.373	5.15566	5.3369	1.4e-05	0.00036815	DUF260 domain containing protein, putative, expressed
LOC_Os03g33580	660.607	147.43	2.1638	4.15e-06	0.00013053	mitotic checkpoint protein, putative, expressed
LOC_Os03g33920	20.2669	2.61042	2.9568	0.0015906	0.018883	conserved hypothetical protein
LOC_Os03g36200	14.4823	0	Inf	2.82e-05	0.0006709	retrotransposon protein, putative, unclassified
LOC_Os03g36534	51.5127	15.0683	1.7734	0.0037385	0.036865	expressed protein
LOC_Os03g36920	81.6312	8.18336	3.3184	0.0012417	0.015421	disease resistance protein, putative, expressed
LOC_Os03g37090	1330.46	396.739	1.7457	0.00014346	0.0026919	expressed protein
LOC_Os03g37290	79.2167	0	Inf	0.00011314	0.0022088	cytochrome P450, putative, expressed
LOC_Os03g37490	5880.27	1758.03	1.7419	0.0020182	0.022757	MATE efflux family protein, putative, expressed
LOC_Os03g37650	9.39831	0	Inf	0.0023059	0.025354	retrotransposon protein, putative, Ty1-copia subclass, expressed
LOC_Os03g37840	4151.6	1128.03	1.8799	0.00032944	0.0053454	potassium transporter, putative, expressed
LOC_Os03g38590	8169.1	1946.6	2.0692	4.57e-06	0.00014204	secretory carrier-associated membrane protein 4, putative, expressed
LOC_Os03g38600	1331.85	4.17632	8.317	1.48e-10	1.44e-08	secretory carrier-associated membrane protein, putative, expressed
LOC_Os03g38800	2678.39	59.6019	5.4899	2.01e-06	6.92e-05	AAA family ATPase, putative, expressed
LOC_Os03g39690	1871.18	28.0255	6.0611	3.3e-08	1.88e-06	cytochrome P450, putative, expressed
LOC_Os03g39850	13.0622	0	Inf	0.0044462	0.042235	glutathione S-transferase, putative, expressed
LOC_Os03g39980	12.985	0.355505	5.1908	0.0047967	0.044802	expressed protein
LOC_Os03g40670	1134.41	171.448	2.7261	2.23e-07	1.02e-05	glycerophosphoryl diester phosphodiesterase family protein, putative, expressed
LOC_Os03g42230	642.075	123.071	2.3833	0.0040615	0.039258	B3 DNA binding domain containing protein, expressed
LOC_Os03g42290	34.533	4.55383	2.9228	0.0051979	0.047629	B3 DNA binding domain containing protein, expressed
LOC_Os03g42520	101.886	0	Inf	2.85e-19	1.52e-16	expressed protein
LOC_Os03g42630	17.9744	2.27692	2.9808	0.0025918	0.027779	No apical meristem protein, putative, expressed
LOC_Os03g42780	123.337	7.60014	4.0204	5.35e-11	5.76e-09	zinc finger protein-related, putative, expressed
LOC_Os03g43820	46.92	2.93122	4.0006	0.0001942	0.0034416	plant invertase/pectin methylesterase inhibitor domain containing protein, expressed
LOC_Os03g43840	2065.46	798.856	1.3705	0.0020655	0.023181	LSD1 zinc finger domain containing protein, expressed
LOC_Os03g44636	170.793	7.93364	4.4281	0.0048523	0.045192	zinc finger, C3HC4 type domain containing protein, expressed
LOC_Os03g44642	88.5387	12.1268	2.8681	1.99e-05	0.00049714	zinc finger, C3HC4 type domain containing protein, expressed
LOC_Os03g45180	1165.62	459.93	1.3416	0.0028874	0.030002	expressed protein
LOC_Os03g45270	255.531	83.2487	1.618	0.0046993	0.044111	CS domain containing protein, putative, expressed
LOC_Os03g45930	1053.41	222.019	2.2463	4.2e-05	0.00093777	expressed protein
LOC_Os03g45980	70.3855	13.532	2.3789	0.00032441	0.0052782	expressed protein
LOC_Os03g46440	6824.93	1478.38	2.2068	2.48e-06	8.32e-05	BTBA4 - Bric-a-Brac,Tramtrack, Broad Complex BTB domain with Ankyrin repeat region, expressed
LOC_Os03g47350	108.17	1.35261	6.3214	7.1e-10	5.97e-08	expressed protein
LOC_Os03g47810	9508.88	1311.28	2.8583	1.16e-09	9.15e-08	nodulin family protein, putative, expressed
LOC_Os03g48270	1372.42	380.169	1.852	4.92e-05	0.0010715	CAMK_CAMK_like.21 - CAMK includes calcium/calmodulin depedent protein kinases, expressed
LOC_Os03g48660	2417.18	628.723	1.9428	1.72e-05	0.0004404	DUF1336 domain containing protein, expressed
LOC_Os03g48710	1673.25	426.93	1.9706	2.21e-05	0.00054174	expressed protein
LOC_Os03g48720	23.183	0.997108	4.5392	0.005344	0.048581	expressed protein
LOC_Os03g48960	39.9477	3.28333	3.6049	4.02e-06	0.00012718	expressed protein
LOC_Os03g49380	3221.98	261.317	3.6241	5.92e-10	5.06e-08	lipoxygenase, putative, expressed
LOC_Os03g49560	282.241	91.5234	1.6247	0.00065743	0.0093002	expressed protein
LOC_Os03g49700	731.637	187.527	1.964	2.07e-05	0.00051558	SNARE associated Golgi protein, putative, expressed
LOC_Os03g49770	4454.95	1320.81	1.754	0.0026062	0.027885	oxysterol-binding protein, putative, expressed
LOC_Os03g49940	2318.3	813.586	1.5107	0.0010384	0.013337	integral membrane protein, putative, expressed
LOC_Os03g50160	65.2476	16.4649	1.9865	0.0022108	0.024489	plastocyanin-like domain containing protein, putative, expressed
LOC_Os03g50210	571.096	110.438	2.3705	5.56e-07	2.29e-05	DUF292 domain containing protein, expressed
LOC_Os03g50280	976.919	163.757	2.5767	5.72e-08	3.04e-06	GLTP domain containing protein, putative, expressed
LOC_Os03g50450	3434.46	989.355	1.7955	6.22e-05	0.0013114	inactive receptor kinase At2g26730 precursor, putative, expressed
LOC_Os03g50560	187.387	34.1936	2.4542	1.81e-06	6.32e-05	RNA recognition motif containing protein, putative, expressed
LOC_Os03g50580	203.599	0	Inf	3.25e-07	1.42e-05	expressed protein
LOC_Os03g50590	104.296	0.308101	8.4031	2.87e-18	1.28e-15	expressed protein
LOC_Os03g50710	2520.58	3.49662	9.4936	2.04e-24	3.12e-21	expressed protein
LOC_Os03g50720	90.1504	0	Inf	4.22e-18	1.77e-15	expressed protein
LOC_Os03g50880	1798.67	247.584	2.8609	1.29e-09	1e-07	class I glutamine amidotransferase, putative, expressed
LOC_Os03g51390	3144.13	313.485	3.3262	1.1e-06	4.17e-05	expressed protein
LOC_Os03g51430	1972.08	369.505	2.4161	1.11e-06	4.19e-05	SEC14 cytosolic factor family protein, putative, expressed
LOC_Os03g51440	938.426	268.213	1.8069	7.82e-05	0.001595	LRR receptor-like protein kinase, putative, expressed
LOC_Os03g51459	431.799	92.673	2.2201	3.24e-06	0.00010509	expressed protein
LOC_Os03g52330	275.925	0	Inf	1.23e-07	6.1e-06	hypothetical protein
LOC_Os03g52370	308.451	1.30521	7.8846	0.00021625	0.0037688	PIII4 - Proteinase inhibitor II family protein precursor, expressed
LOC_Os03g52390	1073.21	38.0813	4.8167	0.0018026	0.020812	PIII1 - Proteinase inhibitor II family protein precursor, expressed
LOC_Os03g52410	195.387	15.6108	3.6457	0.00013971	0.0026339	expressed protein
LOC_Os03g52420	35.2943	3.33073	3.4055	0.00079482	0.010844	expressed protein
LOC_Os03g52720	956.066	112.837	3.0829	4.33e-08	2.37e-06	magnesium-dependent phosphatase 1, putative, expressed
LOC_Os03g53010	2875.22	832.546	1.7881	9.54e-05	0.0018959	acyl-desaturase, chloroplast precursor, putative, expressed
LOC_Os03g53020	3330.58	987.803	1.7535	0.00012587	0.0024087	helix-loop-helix DNA-binding domain containing protein, expressed
LOC_Os03g53070	2862.49	781.484	1.873	3.3e-05	0.00076935	prenylated rab acceptor, putative, expressed
LOC_Os03g53200	4484.35	517.496	3.1153	1.78e-07	8.38e-06	OsCML4 - Calmodulin-related calcium sensor protein, expressed
LOC_Os03g53220	36.5224	4.10352	3.1538	0.00059828	0.0086197	U5 small nuclear ribonucleoprotein 200 kDa helicase, putative, expressed
LOC_Os03g53280	2269.07	923.175	1.2974	0.0031704	0.032388	WD domain containing protein, putative, expressed
LOC_Os03g53350	44.8544	0.937003	5.5811	1.23e-08	7.91e-07	anthocyanin 3-O-beta-glucosyltransferase, putative, expressed
LOC_Os03g53400	134.112	36.0632	1.8948	0.00033226	0.0053837	transmembrane BAX inhibitor motif-containing protein, putative, expressed
LOC_Os03g53440	20.5835	1.94681	3.4023	0.00050129	0.0074847	expressed protein
LOC_Os03g53730	144.182	5.40873	4.7365	8.28e-13	1.29e-10	flavoprotein wrbA, putative, expressed
LOC_Os03g53770	733.381	147.121	2.3176	6.76e-07	2.73e-05	RNA recognition motif containing protein, putative, expressed
LOC_Os03g53800	2467.43	310.113	2.9921	1.72e-07	8.19e-06	periplasmic beta-glucosidase precursor, putative, expressed
LOC_Os03g53950	3747.67	1122.56	1.7392	0.00011489	0.0022381	strictosidine synthase, putative, expressed
LOC_Os03g55010	3634.38	797.541	2.1881	1.63e-06	5.75e-05	UDP-glucoronosyl and UDP-glucosyl transferase domain containing protein, expressed
LOC_Os03g55080	1776.88	742.011	1.2598	0.0037166	0.036709	WRKY3, expressed
LOC_Os03g55180	1752.39	377.809	2.2136	1.15e-06	4.31e-05	DUF1336 domain containing protein, expressed
LOC_Os03g55240	4796.15	1267.64	1.9197	2.43e-05	0.00058935	cytochrome P450, putative, expressed
LOC_Os03g55560	4911.77	1653.48	1.5707	0.0004321	0.0066892	STE_MEKK_ste11_MAP3K.15 - STE kinases include homologs to sterile 7, sterile 11 and sterile 20 from yeast, expressed
LOC_Os03g56090	61.3085	13.9654	2.1342	0.00041044	0.0064039	MYB family transcription factor, putative, expressed
LOC_Os03g56140	15.1427	0	Inf	6.82e-05	0.0014185	homeobox protein rough sheath 1, putative, expressed
LOC_Os03g56250	1789.58	591.897	1.5962	0.0018945	0.021642	LRR receptor-like protein kinase, putative, expressed
LOC_Os03g56500	1690.91	126.039	3.7459	5.32e-10	4.64e-08	expressed protein
LOC_Os03g56540	660.789	202.483	1.7064	0.0028038	0.029338	heat shock protein DnaJ, putative, expressed
LOC_Os03g57210	2155.31	751.426	1.5202	0.00069347	0.0097056	glycine-rich protein, putative, expressed
LOC_Os03g57310	2006.06	415.799	2.2704	7.99e-07	3.16e-05	syntaxin, putative, expressed
LOC_Os03g57400	45.8486	12.2048	1.9094	0.0029664	0.030681	expressed protein
LOC_Os03g57450	710.33	97.2676	2.8685	1.56e-09	1.19e-07	CAMK_CAMK_like.2 - CAMK includes calcium/calmodulin depedent protein kinases, expressed
LOC_Os03g57640	2333.22	13.8401	7.3973	6.22e-07	2.53e-05	gibberellin receptor GID1L2, putative, expressed
LOC_Os03g57880	312.513	107.514	1.5394	0.0011167	0.014149	glucan endo-1,3-beta-glucosidase precursor, putative, expressed
LOC_Os03g58010	723.031	127.737	2.5009	0.0028629	0.0298	acetyltransferase, GNAT family, putative, expressed
LOC_Os03g58630	1531.21	571.281	1.4224	0.0017576	0.020398	thioredoxin, putative, expressed
LOC_Os03g58890	1182.77	53.5218	4.4659	1.53e-06	5.47e-05	oxidoreductase, putative, expressed
LOC_Os03g58900	215.107	25.8281	3.058	5.04e-06	0.00015411	galactosyltransferase family protein, putative, expressed
LOC_Os03g58980	1410.59	110.361	3.676	4.53e-07	1.9e-05	Cupin domain containing protein, expressed
LOC_Os03g59070	1499.01	444.311	1.7544	0.00012125	0.0023328	phosphatase, putative, expressed
LOC_Os03g59110	92.3798	2.15671	5.4207	2.68e-13	4.55e-11	pheophorbide a oxygenase, chloroplast precursor, putative, expressed
LOC_Os03g59390	7159.52	2804.72	1.352	0.0024574	0.026637	CAMK_CAMK_like.24 - CAMK includes calcium/calmodulin depedent protein kinases, expressed
LOC_Os03g59550	57.002	18.1349	1.6522	0.0046207	0.043499	RNA recognition motif containing protein, putative, expressed
LOC_Os03g59600	948.47	249.678	1.9255	3.4e-05	0.00078881	mitochondrial Rho GTPase 1, putative, expressed
LOC_Os03g59770	4076.68	32.399	6.9753	7.82e-25	1.4e-21	EF hand family protein, putative, expressed
LOC_Os03g59790	55.6015	0	Inf	1.5e-05	0.00038877	EF hand family protein, putative, expressed
LOC_Os03g60220	1430.63	144.675	3.3058	7.57e-12	9.43e-10	DUF567 domain containing protein, putative, expressed
LOC_Os03g60250	380.842	49.928	2.9313	2.79e-07	1.24e-05	membrane associated DUF588 domain containing protein, putative, expressed
LOC_Os03g60260	214.914	58.4366	1.8788	0.00057481	0.0083388	ANT1, putative, expressed
LOC_Os03g60310	23.5005	3.62953	2.6948	0.0014484	0.017484	expressed protein
LOC_Os03g60520	332.52	119.618	1.475	0.0014295	0.017308	expressed protein
LOC_Os03g60570	39.561	4.00531	3.3041	6.33e-05	0.0013302	ZOS3-22 - C2H2 zinc finger protein, expressed
LOC_Os03g60580	455.089	72.7006	2.6461	0.00011087	0.0021703	actin-depolymerizing factor, putative, expressed
LOC_Os03g60650	3127.73	1036.21	1.5938	0.00037599	0.0059626	protein phosphatase 2C, putative, expressed
LOC_Os03g60850	1647.84	317.467	2.3759	4.54e-06	0.0001413	peptide transporter PTR2, putative, expressed
LOC_Os03g61290	43.04	1.32721	5.0192	0.0018549	0.021299	ATCHX, putative, expressed
LOC_Os03g61360	96.5686	4.30584	4.4872	1.47e-06	5.31e-05	hydrolase, alpha/beta fold family domain containing protein, expressed
LOC_Os03g61740	53.4683	2.71453	4.2999	1.15e-05	0.00031133	sex determination protein tasselseed-2, putative, expressed
LOC_Os03g61960	8905.37	1281.97	2.7963	2.29e-05	0.00055951	2Fe-2S iron-sulfur cluster binding domain containing protein, expressed
LOC_Os03g62000	141.931	27.2756	2.3795	7.16e-06	0.00020811	retrotransposon protein, putative, unclassified, expressed
LOC_Os03g62010	2294.21	653.087	1.8126	6.03e-05	0.0012779	harpin-induced protein 1 domain containing protein, expressed
LOC_Os03g62200	29548.4	2387.25	3.6297	5.78e-14	1.08e-11	ammonium transporter protein, putative, expressed
LOC_Os03g62220	129.842	44.6621	1.5396	0.00411	0.039632	expressed protein
LOC_Os03g62230	86.4179	8.06655	3.4213	0.0023085	0.025374	ZOS3-24 - C2H2 zinc finger protein, expressed
LOC_Os03g62480	2484.94	9.09324	8.0942	2.98e-09	2.17e-07	anthocyanidin 5,3-O-glucosyltransferase, putative, expressed
LOC_Os03g62490	722.537	235.496	1.6174	0.0003892	0.0061233	prohibitin-2, putative, expressed
LOC_Os03g62830	19.5496	0.628903	4.9582	0.0012002	0.015001	nuclear antigen, putative, expressed
LOC_Os03g62920	17.9796	0.320802	5.8085	0.00061771	0.0088674	expressed protein
LOC_Os03g63900	2129.14	727.738	1.5488	0.0015285	0.018273	1-aminocyclopropane-1-carboxylate oxidase 2, putative, expressed
LOC_Os04g01354	14.5198	0	Inf	0.0038777	0.037933	chalcone synthase, putative, expressed
LOC_Os04g01874	457.472	40.5714	3.4951	2.93e-07	1.29e-05	protein kinase, putative, expressed
LOC_Os04g01890	68.8762	3.55505	4.2761	9.8e-10	7.96e-08	protein kinase, putative, expressed
LOC_Os04g01950	15.1594	0.320802	5.5624	0.00031207	0.0051005	legume lectins beta domain containing protein, putative, expressed
LOC_Os04g01980	432.814	146.599	1.5619	0.00088008	0.011757	receptor protein kinase, putative, expressed
LOC_Os04g02030	329.977	20.1621	4.0326	1.44e-12	2.12e-10	rp1, putative, expressed
LOC_Os04g02040	32.643	3.81742	3.0961	0.00012064	0.0023272	NBS-LRR, putative, expressed
LOC_Os04g02754	4370.62	806.572	2.438	9.56e-08	4.88e-06	amidase family protein, putative, expressed
LOC_Os04g03164	693.434	8.73606	6.3106	1.88e-06	6.52e-05	expressed protein
LOC_Os04g03210	352.432	0.616202	9.1597	5.6e-08	2.98e-06	receptor kinase, putative, expressed
LOC_Os04g03830	2166.86	102.248	4.4055	4.72e-08	2.57e-06	OsWAK29 - OsWAK receptor-like protein kinase, expressed
LOC_Os04g03920	1098.75	38.335	4.8411	5.04e-20	3.06e-17	expressed protein
LOC_Os04g05700	28.6874	4.11622	2.801	0.0006636	0.0093608	expressed protein
LOC_Os04g05770	89.6911	24.297	1.8842	0.00078095	0.010659	expressed protein
LOC_Os04g06520	6339.93	301.816	4.3927	3.89e-06	0.00012348	expressed protein
LOC_Os04g06590	1101.57	17.6728	5.9619	1.69e-07	8.06e-06	expressed protein
LOC_Os04g07250	25.3669	0	Inf	0.00072427	0.010046	expressed protein
LOC_Os04g08550	13638.8	1362.87	3.323	0.00030557	0.0050127	oxidoreductase, aldo/keto reductase family protein, putative, expressed
LOC_Os04g09260	1077.16	43.7151	4.623	6.79e-11	7.14e-09	transferase family protein, putative, expressed
LOC_Os04g09450	139.196	3.49662	5.315	1.86e-15	4.93e-13	expressed protein
LOC_Os04g09680	166.621	64.2025	1.3759	0.0048946	0.045497	caffeic acid 3-O-methyltransferase, putative, expressed
LOC_Os04g09900	19927.9	104.025	7.5817	2.65e-09	1.96e-07	ent-kaurene synthase, chloroplast precursor, putative, expressed
LOC_Os04g09920	2928.3	164.64	4.1527	3.15e-06	0.0001027	cytochrome P450, putative, expressed
LOC_Os04g10000	3324.66	182.606	4.1864	1.79e-05	0.00045359	sex determination protein tasselseed-2, putative, expressed
LOC_Os04g10010	2608.76	13.9754	7.5443	9.41e-07	3.65e-05	sex determination protein tasselseed-2, putative, expressed
LOC_Os04g10060	1214.59	12.7321	6.5759	0.00011709	0.0022698	ent-kaurene synthase, chloroplast precursor, putative, expressed
LOC_Os04g10160	3193.82	63.5037	5.6523	0.00017251	0.0031301	cytochrome P450, putative, expressed
LOC_Os04g10214	1023.85	383.79	1.4156	0.0017939	0.020732	expressed protein
LOC_Os04g10230	17.8053	0.355505	5.6463	2.68e-05	0.00064056	expressed protein
LOC_Os04g10240	2450.66	897.797	1.4487	0.0012031	0.015026	nicotiana lesion-inducing like, putative, expressed
LOC_Os04g10290	80.6742	27.5397	1.5506	0.0052903	0.048203	expressed protein
LOC_Os04g10350	1509.69	386.701	1.965	1.59e-05	0.00040904	1-aminocyclopropane-1-carboxylate oxidase homolog 2, putative, expressed
LOC_Os04g10530	1507.95	221.83	2.7651	0.0008298	0.011223	amidase, putative, expressed
LOC_Os04g10630	12.8983	1.2324	3.3876	0.0054746	0.049416	expressed protein
LOC_Os04g10750	6948.65	1114.82	2.6399	0.00019846	0.0035028	inorganic phosphate transporter, putative, expressed
LOC_Os04g10800	823.215	21.7246	5.2439	5.66e-17	2.08e-14	inorganic phosphate transporter, putative, expressed
LOC_Os04g11780	428.674	18.1975	4.5581	3.06e-05	0.00071994	resistance protein LR10, putative, expressed
LOC_Os04g11820	3831.96	1026.22	1.9007	1.96e-05	0.00049054	white-brown complex homolog protein, putative, expressed
LOC_Os04g12000	95.9266	19.5206	2.2969	2.93e-05	0.00069276	retrotransposon protein, putative, unclassified, expressed
LOC_Os04g12010	1419.86	347.819	2.0293	5.11e-06	0.00015601	glycosyltransferase, putative, expressed
LOC_Os04g12720	20.8851	0.616202	5.0829	1.91e-05	0.00047842	indole-3-acetate beta-glucosyltransferase, putative, expressed
LOC_Os04g12950	15.191	0.355505	5.4172	0.00011059	0.0021673	indole-3-acetate beta-glucosyltransferase, putative, expressed
LOC_Os04g12960	62.8818	0	Inf	0.0010983	0.013951	UDP-glucoronosyl/UDP-glucosyl transferase, putative, expressed
LOC_Os04g12970	146.915	0.355505	8.6909	2.14e-07	9.88e-06	UDP-glucoronosyl/UDP-glucosyl transferase, putative, expressed
LOC_Os04g13140	17.8384	0.355505	5.649	2.13e-05	0.00052709	vignain precursor, putative, expressed
LOC_Os04g13210	2421.29	191.945	3.657	1.8e-13	3.11e-11	multidrug resistance-associated protein, putative, expressed
LOC_Os04g13220	6404.88	2018.95	1.6656	0.00019399	0.0034413	ABC transporter family protein, putative, expressed
LOC_Os04g14570	15.6616	0	Inf	1.6e-05	0.0004117	expressed protein
LOC_Os04g14840	18.8066	1.92141	3.291	0.001049	0.013459	retrotransposon protein, putative, unclassified, expressed
LOC_Os04g15580	2748.84	1082.34	1.3447	0.0028347	0.029576	serine/threonine-protein kinase receptor precursor, putative, expressed
LOC_Os04g15690	17872.5	1465.46	3.6083	9.37e-05	0.001867	DSBA-like thioredoxin domain containing protein, expressed
LOC_Os04g15920	8770.23	229.12	5.2584	2.13e-08	1.27e-06	dehydrogenase, putative, expressed
LOC_Os04g17669	131.217	10.6465	3.6235	6.71e-06	0.00019689	expressed protein
LOC_Os04g17730	72.2076	0	Inf	4.98e-16	1.56e-13	hypothetical protein
LOC_Os04g17740	116.234	0	Inf	3.86e-16	1.22e-13	transposon protein, putative, unclassified, expressed
LOC_Os04g18770	659.882	12.3673	5.7376	3e-24	4.12e-21	retrotransposon protein, putative, unclassified, expressed
LOC_Os04g18780	67.4856	0.616202	6.775	2.14e-13	3.66e-11	retrotransposon protein, putative, unclassified
LOC_Os04g19114	31.5728	1.99422	3.9848	5.96e-06	0.00017724	retrotransposon protein, putative, Ty3-gypsy subclass, expressed
LOC_Os04g20290	178.923	0.308101	9.1817	5.06e-09	3.53e-07	retrotransposon protein, putative, unclassified, expressed
LOC_Os04g20680	39.2474	7.63066	2.3627	0.0039382	0.03835	wall-associated receptor kinase 3 precursor, putative, expressed
LOC_Os04g21840	397.284	103.533	1.9401	4.41e-05	0.00097514	expressed protein
LOC_Os04g21950	13540.6	5062.27	1.4194	0.001337	0.016399	WRKY51, expressed
LOC_Os04g22080	7306.5	56.9566	7.0032	1.15e-05	0.0003104	retrotransposon protein, putative, unclassified, expressed
LOC_Os04g22100	10.5556	0	Inf	0.00044949	0.0068957	BED zinc finger family protein, expressed
LOC_Os04g22120	2126.69	615.323	1.7892	5.38e-05	0.00116	protein kinase, putative, expressed
LOC_Os04g22140	117.573	4.56063	4.6882	5.66e-13	9.08e-11	expressed protein
LOC_Os04g25060	97.9082	11.5929	3.0782	0.00025717	0.0043484	cysteine-rich receptor-like protein kinase, putative, expressed
LOC_Os04g25454	61.7467	18.0258	1.7763	0.002725	0.028682	transposon protein, putative, CACTA, En/Spm sub-class, expressed
LOC_Os04g25650	44.8583	3.53812	3.6643	0.00015772	0.0029144	cysteine-rich receptor-like protein kinase, putative, expressed
LOC_Os04g25900	66.3391	0	Inf	1.78e-11	2.1e-09	go35 NBS-LRR, putative, expressed
LOC_Os04g27060	819.977	0.937003	9.7733	9.68e-15	2.12e-12	oxidoreductase, aldo/keto reductase family protein, putative, expressed
LOC_Os04g27092	101.658	10.3274	3.2992	6.31e-06	0.00018652	retrotransposon protein, putative, unclassified, expressed
LOC_Os04g27094	31.1921	6.50064	2.2625	0.0021765	0.024206	retrotransposon protein, putative, unclassified, expressed
LOC_Os04g27096	423.055	101.682	2.0568	1.81e-05	0.00045817	expressed protein
LOC_Os04g27800	743.639	8.63195	6.4288	1.73e-08	1.06e-06	expressed protein
LOC_Os04g27810	1323.31	21.1905	5.9646	2.19e-07	1.01e-05	retrotransposon protein, putative, Ty3-gypsy subclass, expressed
LOC_Os04g27910	155.761	25.7324	2.5977	1.44e-06	5.22e-05	retrotransposon protein, putative, unclassified
LOC_Os04g27950	718.246	261.922	1.4553	0.0016213	0.019133	expressed protein
LOC_Os04g28360	14.1209	0	Inf	0.0051857	0.047529	expressed protein
LOC_Os04g28780	179.215	15.7048	3.5124	1.11e-07	5.62e-06	serine/threonine-protein kinase receptor precursor, putative, expressed
LOC_Os04g29760	7.75539	0	Inf	0.0031435	0.032141	expressed protein
LOC_Os04g29950	221.866	76.8817	1.529	0.0018655	0.021386	wall-associated receptor kinase, putative, expressed
LOC_Os04g30040	7866.87	421.559	4.222	1.41e-07	6.89e-06	jacalin-like lectin domain containing protein, expressed
LOC_Os04g30060	674.186	46.2542	3.8655	5.39e-14	1.01e-11	wall-associated receptor kinase-like 10 precursor, putative, expressed
LOC_Os04g30070	46.904	4.00531	3.5497	2.22e-06	7.57e-05	expressed protein
LOC_Os04g30080	88.916	12.2284	2.8622	1.85e-06	6.44e-05	retrotransposon protein, putative, Ty3-gypsy subclass
LOC_Os04g30090	154.891	23.1576	2.7417	4.85e-07	2.03e-05	retrotransposon protein, putative, unclassified, expressed
LOC_Os04g30100	55.7497	9.91003	2.492	0.00014677	0.002741	transposon protein, putative, CACTA, En/Spm sub-class
LOC_Os04g30110	880.03	96.3529	3.1912	9.13e-11	9.28e-09	wall-associated receptor kinase 3 precursor, putative, expressed
LOC_Os04g30240	7630.39	1254.2	2.605	6.66e-06	0.00019602	OsWAK60 - OsWAK receptor-like protein kinase, expressed
LOC_Os04g30260	1160.53	1.87401	9.2744	6.88e-09	4.7e-07	OsWAK47 - OsWAK receptor-like protein kinase, expressed
LOC_Os04g30330	167.095	17.3088	3.2711	5.92e-06	0.00017625	OsWAK59 - OsWAK receptor-like cytoplasmic kinase OsWAK-RLCK, expressed
LOC_Os04g30340	221.863	20.7885	3.4158	1.69e-10	1.62e-08	wall-associated receptor kinase, putative, expressed
LOC_Os04g30490	4665.74	420.741	3.4711	4.97e-10	4.39e-08	MATE efflux family protein, putative, expressed
LOC_Os04g30770	355.054	90.5445	1.9713	0.00018382	0.0032968	glycosyl hydrolase, putative, expressed
LOC_Os04g30930	762.076	232.839	1.7106	0.00017923	0.0032258	NB-ARC domain containing protein, expressed
LOC_Os04g31030	3205.09	1343.02	1.2549	0.0053753	0.048829	nitrate-induced NOI protein, expressed
LOC_Os04g31610	246.646	48.429	2.3485	2.65e-06	8.86e-05	OsFBO3 - F-box and other domain containing protein, expressed
LOC_Os04g31630	1627.64	425.705	1.9349	1.83e-05	0.00046196	expressed protein
LOC_Os04g32080	27.3744	1.03181	4.7296	3.22e-05	0.00075317	11-beta-hydroxysteroid dehydrogenase, putative, expressed
LOC_Os04g32370	2273.78	569.447	1.9975	1.41e-05	0.00037048	hydroxyproline-rich glycoprotein family protein, putative, expressed
LOC_Os04g32404	440.853	44.333	3.3138	4e-11	4.46e-09	expressed protein
LOC_Os04g32480	347.164	4.86193	6.1579	2.41e-07	1.09e-05	zinc-finger protein, putative, expressed
LOC_Os04g32740	1053.26	90.0602	3.5478	7.34e-07	2.93e-05	hydrolase, NUDIX family, domain containing protein, expressed
LOC_Os04g32920	6843.92	1548.2	2.1442	8.35e-05	0.0016863	potassium transporter, putative, expressed
LOC_Os04g33190	6321.27	1746.66	1.8556	4.34e-05	0.00096332	AMP-binding enzyme, putative, expressed
LOC_Os04g33320	71.3569	6.75794	3.4004	1.49e-05	0.00038841	expressed protein
LOC_Os04g33390	20701.2	246.366	6.3928	3.87e-05	0.0008788	prephenate dehydratase domain containing protein, expressed
LOC_Os04g33640	1026.29	289.295	1.8268	0.0016549	0.019471	glycosyl hydrolases family 17, putative, expressed
LOC_Os04g33950	738.036	192.23	1.9409	3.55e-05	0.00081788	E2F family transcription factor protein, putative, expressed
LOC_Os04g34000	823.459	257.579	1.6767	0.00026912	0.0045163	digalactosyldiacylglycerol synthase, chloroplast precursor, putative, expressed
LOC_Os04g34180	74.1492	0	Inf	9.97e-06	0.00027686	expressed protein
LOC_Os04g35130	1237.8	264.989	2.2238	1.52e-06	5.47e-05	expressed protein
LOC_Os04g35250	190.565	2.16941	6.4568	2.89e-07	1.28e-05	MONOCULM 1, putative, expressed
LOC_Os04g35270	19.7192	2.67982	2.8794	0.0018459	0.021208	alpha-1,4-fucosyltransferase, putative, expressed
LOC_Os04g35520	2842.97	728.556	1.9643	1.23e-05	0.00032757	OsAPx7 - Stromal Ascorbate Peroxidase encoding gene 5,8, expressed
LOC_Os04g35534	66.3422	16.3972	2.0165	0.00074387	0.010266	expressed protein
LOC_Os04g35540	963.928	129.983	2.8906	1.39e-09	1.08e-07	amino acid permease family protein, putative, expressed
LOC_Os04g35560	1633.97	242.79	2.7506	4.25e-09	3.02e-07	glutathione S-transferase, putative, expressed
LOC_Os04g35890	627.046	51.8037	3.5974	8.19e-06	0.00023404	TKL_IRAK_CR4L.3 - The CR4L subfamily has homology with Crinkly4, expressed
LOC_Os04g36710	49.2474	8.22736	2.5815	0.00011083	0.0021703	methyltransferase domain containing protein, expressed
LOC_Os04g37430	2636.54	453.225	2.5403	0.00012209	0.0023474	lipoxygenase protein, putative, expressed
LOC_Os04g37490	8575.98	253.986	5.0775	1.76e-19	9.71e-17	oxidoreductase, aldo/keto reductase family protein, putative, expressed
LOC_Os04g37670	1814.32	374.188	2.2776	8.37e-07	3.28e-05	steroid nuclear receptor, ligand-binding, putative, expressed
LOC_Os04g37700	626.69	30.068	4.3815	6.13e-17	2.19e-14	expressed protein
LOC_Os04g37740	3342.12	622.527	2.4246	0.00075236	0.010343	zinc finger, C3HC4 type domain containing protein, expressed
LOC_Os04g37760	186.023	33.4571	2.4751	4.26e-05	0.0009476	expressed protein
LOC_Os04g37790	5663	513.275	3.4638	1.58e-12	2.28e-10	expressed protein
LOC_Os04g37904	4111.52	1394.28	1.5601	0.00049309	0.0074026	protein phosphatase 2C, putative, expressed
LOC_Os04g37960	62.3064	18.2246	1.7735	0.0026951	0.028469	synaptonemal complex protein 2, putative, expressed
LOC_Os04g38480	15432.5	4646.77	1.7317	0.00013616	0.0025725	BRASSINOSTEROID INSENSITIVE 1-associated receptor kinase 1 precursor, putative, expressed
LOC_Os04g38500	329.082	60.4035	2.4457	0.00013901	0.0026221	expressed protein
LOC_Os04g38540	591.823	141.628	2.0631	0.0010762	0.013724	aldose 1-epimerase, putative, expressed
LOC_Os04g38910	571.678	1.01911	9.1317	2.55e-22	2.28e-19	atypical receptor-like kinase MARK, putative, expressed
LOC_Os04g38950	3876.71	1072.36	1.854	0.0004556	0.0069566	class I glutamine amidotransferase, putative, expressed
LOC_Os04g39240	1035.51	349.674	1.5663	0.00051374	0.0076324	expressed protein
LOC_Os04g39320	12051.6	483.488	4.6396	3.43e-20	2.15e-17	expressed protein
LOC_Os04g39540	7079.37	282.669	4.6464	8.9e-08	4.59e-06	expressed protein
LOC_Os04g39880	3690.41	550.117	2.746	1.22e-08	7.84e-07	Os4bglu12 - beta-glucosidase, exo-beta-glucanase, expressed
LOC_Os04g39980	1131.21	372.729	1.6017	0.00029143	0.0048205	gibberellin 20 oxidase 2, putative, expressed
LOC_Os04g40140	312.288	80.6171	1.9537	5.27e-05	0.0011397	expressed protein
LOC_Os04g40470	107.203	9.92958	3.4325	8.42e-09	5.58e-07	cytochrome P450, putative, expressed
LOC_Os04g40590	30.2967	7.13885	2.0854	0.0052411	0.04789	wax synthase isoform 1, putative, expressed
LOC_Os04g40990	106.048	15.5322	2.7714	0.0016089	0.019022	malate synthase, glyoxysomal, putative, expressed
LOC_Os04g41160	7976.3	864.584	3.2056	0.00088021	0.011757	protein kinase, putative, expressed
LOC_Os04g41170	38.4245	0	Inf	0.00097395	0.012689	retrotransposon protein, putative, unclassified, expressed
LOC_Os04g41370	140.568	13.0072	3.4339	1.34e-07	6.63e-06	Leucine Rich Repeat family protein, expressed
LOC_Os04g41380	746.43	14.4402	5.6918	1.02e-10	1.03e-08	Leucine Rich Repeat family protein, expressed
LOC_Os04g41390	49.8136	0.308101	7.337	9.88e-08	5.03e-06	expressed protein
LOC_Os04g41400	283.492	84.1233	1.7527	0.00021583	0.0037634	peptide transporter PTR2, putative, expressed
LOC_Os04g41500	5222.9	1813.93	1.5257	0.00062558	0.008966	expressed protein
LOC_Os04g41540	340.101	104.234	1.7061	0.0002712	0.0045427	OsCML22 - Calmodulin-related calcium sensor protein, expressed
LOC_Os04g41860	506.936	79.5346	2.6721	3.84e-08	2.13e-06	expressed protein
LOC_Os04g41960	3798.74	1162.82	1.7079	0.00014673	0.002741	NADP-dependent oxidoreductase, putative, expressed
LOC_Os04g42480	2908.6	861.6	1.7552	0.00010801	0.002119	receptor-like protein kinase At3g46290 precursor, putative, expressed
LOC_Os04g42760	82.8567	2.58502	5.0024	7.06e-12	8.89e-10	sialyltransferase family domain containing protein, expressed
LOC_Os04g42770	351.031	115.261	1.6067	0.00062718	0.0089818	expressed protein
LOC_Os04g42980	792.921	239.27	1.7285	0.00026207	0.0044166	zinc finger family protein, putative, expressed
LOC_Os04g43070	3125.84	1211.99	1.3669	0.0027905	0.029217	ammonium transporter protein, putative, expressed
LOC_Os04g43090	309.644	114.475	1.4356	0.002608	0.027895	expressed protein
LOC_Os04g43440	3596.75	141.491	4.6679	1.06e-09	8.52e-08	NB-ARC/LRR disease resistance protein, putative, expressed
LOC_Os04g43450	74.3811	0.616202	6.9154	3.69e-14	7.45e-12	expressed protein
LOC_Os04g43680	1557.35	39.7638	5.2915	3.08e-06	0.00010082	MYB family transcription factor, putative, expressed
LOC_Os04g43800	3928.99	409.348	3.2628	0.00021942	0.0038185	phenylalanine ammonia-lyase, putative, expressed
LOC_Os04g43916	4806.07	1278.24	1.9107	2.2e-05	0.00054174	expressed protein
LOC_Os04g44120	57.7851	11.2898	2.3557	0.00054411	0.007994	collagen triple helix repeat, putative, expressed
LOC_Os04g44250	278.829	14.0703	4.3087	9.44e-06	0.00026454	cytokinin-O-glucosyltransferase 3, putative, expressed
LOC_Os04g44750	482.859	52.7643	3.194	1.85e-10	1.76e-08	transporter family protein, putative, expressed
LOC_Os04g44760	302.723	2.49021	6.9256	4.68e-12	6.18e-10	expressed protein
LOC_Os04g44770	206.961	62.8005	1.7205	0.00045717	0.0069747	expressed protein
LOC_Os04g44790	3028.32	1128.13	1.4246	0.0015948	0.018913	expressed protein
LOC_Os04g44900	1760.71	678.603	1.3755	0.0022135	0.024511	lectin-like receptor kinase, putative, expressed
LOC_Os04g44910	5344.45	1767.54	1.5963	0.00037069	0.005889	receptor like protein kinase, putative, expressed
LOC_Os04g44980	301.662	29.9818	3.3308	0.00062637	0.0089738	short-chain dehydrogenase/reductase, putative, expressed
LOC_Os04g45170	1193.1	213.637	2.4815	2.89e-06	9.56e-05	leucine-rich repeat family protein, putative, expressed
LOC_Os04g45280	649.156	185.602	1.8064	8.76e-05	0.0017611	histidine triad family protein, putative, expressed
LOC_Os04g45290	1271.09	449.392	1.5	0.0034441	0.034465	glycosyl hydrolases, putative, expressed
LOC_Os04g45580	2710.74	929.292	1.5445	0.00050644	0.007549	kinesin motor domain containing protein, expressed
LOC_Os04g45590	17.6948	0	Inf	4.61e-06	0.00014289	glyoxalase family protein, putative, expressed
LOC_Os04g45920	29.2227	4.67404	2.6443	0.00064762	0.0092045	protein kinase domain containing protein, expressed
LOC_Os04g45970	4065.65	361.092	3.493	1.39e-06	5.06e-05	glutamate dehydrogenase protein, putative, expressed
LOC_Os04g46000	45.1809	9.22787	2.2916	0.00051779	0.0076735	cyclin, putative, expressed
LOC_Os04g46020	688.589	254.063	1.4385	0.0014261	0.017277	GATA zinc finger domain containing protein, expressed
LOC_Os04g46440	145.318	53.5514	1.4402	0.004685	0.043989	AP2 domain containing protein, expressed
LOC_Os04g46444	25.6105	2.28962	3.4836	0.00010302	0.0020312	expressed protein
LOC_Os04g46680	61.4543	6.32963	3.2793	3.63e-06	0.00011613	ZOS4-10 - C2H2 zinc finger protein, expressed
LOC_Os04g46970	2212.37	28.7042	6.2682	1.44e-09	1.11e-07	glucosyltransferase, putative, expressed
LOC_Os04g47110	33.3828	7.71105	2.1141	0.0033125	0.033468	expressed protein
LOC_Os04g47320	274.658	61.5453	2.1579	1.5e-05	0.00038995	uncharacterized mscS family protein, putative, expressed
LOC_Os04g47450	75.813	13.4508	2.4948	0.00047931	0.0072329	expressed protein
LOC_Os04g47620	74.6373	1.66071	5.49	2.44e-12	3.41e-10	protein kinase APK1B, chloroplast precursor, putative, expressed
LOC_Os04g47890	119.24	19.8304	2.5881	0.0042006	0.04032	MYB family transcription factor, putative, expressed
LOC_Os04g48130	2332.41	71.3055	5.0317	4.66e-22	3.87e-19	OsRhmbd11 - Putative Rhomboid homologue, expressed
LOC_Os04g48460	3731.74	948.477	1.9762	1.01e-05	0.00027999	cytochrome P450, putative, expressed
LOC_Os04g48480	416.151	104.887	1.9883	2.35e-05	0.00057155	exostosin family domain containing protein, expressed
LOC_Os04g48700	74.0211	5.17003	3.8397	1.26e-08	8.02e-07	TruB family pseudouridylate synthase, putative, expressed
LOC_Os04g48850	695.13	14.6823	5.5651	6.46e-05	0.001355	aminotransferase, classes I and II, domain containing protein, expressed
LOC_Os04g49194	2921.74	595.86	2.2938	6.99e-07	2.81e-05	naringenin,2-oxoglutarate 3-dioxygenase, putative, expressed
LOC_Os04g49210	12027.2	17.021	9.4648	0.00012125	0.0023328	naringenin,2-oxoglutarate 3-dioxygenase, putative, expressed
LOC_Os04g49360	78.9598	8.11813	3.2819	0.00017823	0.0032111	OsFBX149 - F-box domain containing protein, expressed
LOC_Os04g49450	197.15	18.2483	3.4335	0.00024372	0.0041655	MYB family transcription factor, putative, expressed
LOC_Os04g49460	12.6537	0.924303	3.775	0.0030228	0.031165	protein kinase domain containing protein, expressed
LOC_Os04g49480	19.341	0.962405	4.3289	0.00010785	0.0021171	legume lectins beta domain containing protein, putative, expressed
LOC_Os04g50120	5905.56	1942.26	1.6043	0.0003314	0.0053747	zinc-binding protein, putative, expressed
LOC_Os04g50790	969.019	149.753	2.6939	1.56e-08	9.79e-07	RNA recognition motif, putative, expressed
LOC_Os04g50940	462.266	0.628903	9.5217	1.8e-05	0.00045621	peptide transporter PTR2, putative, expressed
LOC_Os04g50950	464.125	6.10453	6.2485	7.77e-11	8.02e-09	peptide transporter PTR2, putative, expressed
LOC_Os04g51150	10470.9	670.535	3.9649	5.57e-16	1.7e-13	transposon protein, putative, unclassified, expressed
LOC_Os04g51160	2040.83	128.091	3.9939	1.24e-06	4.6e-05	transposon protein, putative, unclassified, expressed
LOC_Os04g51460	74.0359	3.15721	4.5515	0.00017998	0.0032378	glycosyl hydrolases family 16, putative, expressed
LOC_Os04g51560	3954.89	1094.93	1.8528	4.13e-05	0.00092344	WRKY68, expressed
LOC_Os04g51794	635.195	156.298	2.0229	1.5e-05	0.00038877	DNA binding protein, putative, expressed
LOC_Os04g51920	551.796	167.474	1.7202	0.00017466	0.0031595	protein disulfide isomerase, putative, expressed
LOC_Os04g51930	101.674	5.63305	4.1739	8.33e-05	0.0016841	retrotransposon protein, putative, LINE subclass, expressed
LOC_Os04g51940	3618.93	1038.55	1.801	5.51e-05	0.0011808	YT521-B, putative, expressed
LOC_Os04g51970	527.206	201.345	1.3887	0.0026906	0.028429	synaptic vesicle 2-related protein, putative, expressed
LOC_Os04g52090	2096.27	322.603	2.7	9.58e-09	6.31e-07	AP2 domain containing protein, expressed
LOC_Os04g52190	18245.1	3259.34	2.4849	0.00032085	0.0052297	vacuolar-sorting receptor precursor, putative, expressed
LOC_Os04g52504	363.043	53.1148	2.773	0.00060658	0.0087217	adhesive/proline-rich protein, putative, expressed
LOC_Os04g52540	2850.68	806.251	1.822	0.0035831	0.035616	retrotransposon protein, putative, unclassified, expressed
LOC_Os04g52730	1945.25	446.571	2.123	3.67e-06	0.00011716	NAD dependent epimerase/dehydratase family domain containing protein, expressed
LOC_Os04g52740	101.309	0.308101	8.3611	5.08e-18	2.06e-15	expressed protein
LOC_Os04g52770	51.1521	3.26132	3.9713	0.0015306	0.018277	helix-loop-helix DNA-binding domain containing protein, expressed
LOC_Os04g52790	539.711	17.2529	4.9673	3.12e-08	1.79e-06	expressed protein
LOC_Os04g52840	2025.55	435.912	2.2162	1.23e-06	4.55e-05	tyrosine protein kinase domain containing protein, putative, expressed
LOC_Os04g52890	325.18	54.2472	2.5836	0.0018464	0.021208	ATBAG1, putative, expressed
LOC_Os04g52910	36.1714	1.58791	4.5097	4.4e-07	1.85e-05	hypothetical protein
LOC_Os04g52920	107.783	2.01622	5.7403	4.02e-15	9.6e-13	remorin family protein, putative, expressed
LOC_Os04g52980	63.6474	11.9974	2.4074	9.34e-05	0.0018629	expressed protein
LOC_Os04g53040	248.686	19.9708	3.6384	4.69e-07	1.97e-05	retrotransposon protein, putative, unclassified, expressed
LOC_Os04g53050	356.817	26.7635	3.7368	5.03e-13	8.18e-11	disease resistance RPP13-like protein 1, putative, expressed
LOC_Os04g53060	171.184	4.75615	5.1696	5.55e-13	8.93e-11	NBS-LRR disease resistance protein, putative, expressed
LOC_Os04g53160	214.078	70.9213	1.5938	0.00092191	0.012187	NBS-LRR disease resistance protein, putative, expressed
LOC_Os04g53606	552.399	5.47813	6.6559	2.51e-06	8.43e-05	expressed protein
LOC_Os04g53720	4853.53	397.749	3.6091	2.49e-11	2.83e-09	SNF2 family N-terminal domain containing protein, expressed
LOC_Os04g53850	2057.31	461.299	2.157	9.4e-05	0.0018712	leucoanthocyanidin reductase, putative, expressed
LOC_Os04g53994	1104.62	126.35	3.1281	7.65e-11	7.97e-09	kinase, putative, expressed
LOC_Os04g53998	2611.07	458.315	2.5102	5.18e-08	2.79e-06	kinase, putative, expressed
LOC_Os04g54002	506.626	165.116	1.6174	0.00042742	0.0066254	serine/threonine-protein kinase receptor precursor, putative, expressed
LOC_Os04g54080	1670.27	45.4325	5.2002	2.05e-07	9.51e-06	serine/threonine-protein kinase receptor precursor, putative, expressed
LOC_Os04g54090	114.356	0.962405	6.8927	4.1e-06	0.0001292	RALFL18 - Rapid ALkalinization Factor RALF family protein precursor, expressed
LOC_Os04g54100	14.4944	0	Inf	0.0015274	0.018272	exostosin family protein, putative, expressed
LOC_Os04g54120	107.977	1.59131	6.0844	2.59e-07	1.16e-05	serine/threonine-protein kinase receptor precursor, putative, expressed
LOC_Os04g54130	220.602	0	Inf	1.92e-07	8.95e-06	TKL_IRAK_DUF26-ld.1 - DUF26 kinases have homology to DUF26 containing loci, expressed
LOC_Os04g54140	929.915	0.320802	11.501	3.48e-13	5.78e-11	receptor-like kinase, putative, expressed
LOC_Os04g54200	2649.01	245.107	3.434	8.21e-13	1.29e-10	diacylglycerol kinase, putative, expressed
LOC_Os04g54740	19.4008	0.628903	4.9471	0.0012527	0.015537	expressed protein
LOC_Os04g54830	552.567	70.5514	2.9694	9.52e-10	7.77e-08	expressed protein
LOC_Os04g55140	84.5428	0	Inf	0.00094032	0.012371	retrotransposon protein, putative, Ty1-copia subclass, expressed
LOC_Os04g55150	4358.95	650.47	2.7444	2.87e-09	2.09e-07	UBA/TS-N domain containing protein, expressed
LOC_Os04g55410	5518.9	1922.84	1.5211	0.00058674	0.0084877	FGGY family of carbohydrate kinases, putative, expressed
LOC_Os04g55420	653.013	208.41	1.6477	0.00034601	0.0055663	leucine-rich repeat family protein, putative, expressed
LOC_Os04g55640	1129.11	458.111	1.3014	0.0038216	0.037477	plant-specific domain TIGR01627 family protein, expressed
LOC_Os04g55840	698.922	7.86256	6.474	1.39e-27	8.3e-24	expressed protein
LOC_Os04g55940	2615.38	861.248	1.6025	0.00036343	0.0057891	sodium/calcium exchanger protein, putative, expressed
LOC_Os04g55980	11139.8	5.32495	11.031	1.63e-09	1.24e-07	glycine-rich RNA-binding, abscisic acid-inducible protein, putative, expressed
LOC_Os04g56000	3173.53	0	Inf	2.33e-09	1.74e-07	AGAP001055-PA, putative, expressed
LOC_Os04g56030	2675.02	2.72723	9.9379	2.33e-38	4.16e-34	glycine-rich cell wall structural protein precursor, putative, expressed
LOC_Os04g56040	5939.48	4.07812	10.508	9.64e-21	6.38e-18	glycine rich protein family protein, putative, expressed
LOC_Os04g56050	205.342	0	Inf	5.36e-07	2.21e-05	expressed protein
LOC_Os04g56110	8563.46	3175.32	1.4313	0.0010557	0.013521	protein kinase, putative, expressed
LOC_Os04g56420	7.85601	0	Inf	0.003041	0.03129	retrotransposon protein, putative, unclassified, expressed
LOC_Os04g56700	842.474	0.320802	11.359	3.88e-22	3.31e-19	naringenin,2-oxoglutarate 3-dioxygenase, putative, expressed
LOC_Os04g56910	49.9028	0.962405	5.6963	0.00047312	0.0071544	transferase family protein, putative, expressed
LOC_Os04g56920	32.4755	0	Inf	4.46e-07	1.88e-05	glycosyl hydrolases, putative, expressed
LOC_Os04g56930	1634.03	0.320802	12.314	8.91e-29	6.37e-25	glycosyl hydrolases, putative, expressed
LOC_Os04g57360	576.033	174.841	1.7201	0.00023359	0.0040258	expressed protein
LOC_Os04g57540	1975.92	640.306	1.6257	0.00037701	0.0059735	adenylate kinase, putative, expressed
LOC_Os04g57550	4150.21	803.626	2.3686	2.66e-07	1.19e-05	amine oxidase, flavin-containing, domain containing protein, expressed
LOC_Os04g57810	1662.45	507.731	1.7112	0.0027405	0.028787	GA18008-PA, putative, expressed
LOC_Os04g57850	4034.06	444.042	3.1835	0.0011949	0.01496	AMP-binding enzyme, putative, expressed
LOC_Os04g57970	109.069	21.6611	2.3321	0.0018427	0.021179	expressed protein
LOC_Os04g58040	87.7583	29.6795	1.5641	0.0042413	0.040634	expressed protein
LOC_Os04g58090	2705.57	14.3903	7.5547	7.77e-11	8.02e-09	harpin-induced protein 1 domain containing protein, expressed
LOC_Os04g58100	68.8461	3.95963	4.1199	1.73e-07	8.19e-06	expressed protein
LOC_Os04g58220	857.119	47.6204	4.1698	7.19e-09	4.88e-07	transporter family protein, putative, expressed
LOC_Os04g58230	28.6007	0	Inf	0.0045885	0.043322	transporter family protein, putative, expressed
LOC_Os04g58250	1006.12	418.336	1.2661	0.0043277	0.041307	protein kinase, putative, expressed
LOC_Os04g58330	1740.14	333.775	2.3823	2.29e-07	1.05e-05	expressed protein
LOC_Os04g58340	88.1256	25.928	1.765	0.0013936	0.016978	expressed protein
LOC_Os04g58400	333.753	71.4462	2.2239	8.61e-06	0.00024456	tRNA synthetase, putative, expressed
LOC_Os04g58700	342.328	20.1816	4.0843	0.00065477	0.0092802	expressed protein
LOC_Os04g58710	15885	1672.82	3.2473	8.03e-09	5.36e-07	AMP-binding domain containing protein, expressed
LOC_Os04g58720	32.5567	5.95552	2.4507	0.0019631	0.022209	anthranilate phosphoribosyltransferase, putative, expressed
LOC_Os04g58810	601.137	85.6295	2.8115	5.62e-05	0.0012018	CAF1 family ribonuclease containing protein, putative, expressed
LOC_Os04g58840	39.027	9.02216	2.1129	0.0027676	0.029028	Eukaryotic aspartyl protease domain containing protein, expressed
LOC_Os04g58850	2021.97	432.749	2.2242	1.57e-06	5.6e-05	harpin-induced protein 1 domain containing protein, expressed
LOC_Os04g58860	268.443	24.5941	3.4482	6.31e-11	6.69e-09	harpin-induced protein 1 domain containing protein, expressed
LOC_Os04g58890	2071.73	638.992	1.697	0.00090704	0.012027	expressed protein
LOC_Os04g58920	721.987	0	Inf	5.75e-12	7.45e-10	U-box domain-containing protein, putative, expressed
LOC_Os04g59150	2029.77	64.0551	4.9859	3.77e-07	1.62e-05	peroxidase precursor, putative, expressed
LOC_Os04g59200	161.361	1.96881	6.3568	0.00026671	0.0044822	peroxidase precursor, putative, expressed
LOC_Os04g59210	58.9301	4.01801	3.8744	8.68e-08	4.49e-06	peroxidase precursor, putative, expressed
LOC_Os05g01010	110.336	24.6212	2.1639	7.48e-05	0.0015372	expressed protein
LOC_Os05g01030	10509	1811.13	2.5367	3.26e-08	1.86e-06	phospholipid-transporting ATPase, putative, expressed
LOC_Os05g01250	2802.63	683.926	2.0349	7.43e-06	0.00021558	SNF7 domain containing protein, putative, expressed
LOC_Os05g01330	184.434	41.7453	2.1434	0.00019301	0.0034273	expressed protein
LOC_Os05g01810	15.35	0.676307	4.5044	0.00030245	0.0049751	xylem cysteine proteinase 2 precursor, putative, expressed
LOC_Os05g02140	1921.73	102.609	4.2272	2.34e-17	8.89e-15	clathrin assembly protein, putative, expressed
LOC_Os05g02450	130.515	20.6582	2.6594	6.2e-05	0.0013095	expressed protein
LOC_Os05g02770	1876.48	574.508	1.7076	0.00012555	0.0024038	glycine-rich cell wall structural protein precursor, putative, expressed
LOC_Os05g02940	4060.42	713.797	2.508	4.72e-05	0.0010331	calcium-transporting ATPase 2, endoplasmic reticulum-type, putative, expressed
LOC_Os05g03400	52.8407	0.924303	5.8371	2.33e-06	7.89e-05	expressed protein
LOC_Os05g03620	1728.78	238.629	2.8569	0.00018932	0.0033768	TKL_IRAK_CR4L.4 - The CR4L subfamily has homology with Crinkly4, expressed
LOC_Os05g03740	2078.58	253.826	3.0337	1.16e-10	1.16e-08	transcription factor TF2, putative, expressed
LOC_Os05g03770	764.381	5.43413	7.1361	6.05e-11	6.46e-09	expressed protein
LOC_Os05g03920	258.123	63.6709	2.0194	2.72e-05	0.0006493	TKL_IRAK_DUF26-lf.3 - DUF26 kinases have homology to DUF26 containing loci, expressed
LOC_Os05g04640	6316.87	1386.59	2.1877	1.18e-06	4.42e-05	WRKY5, expressed
LOC_Os05g04700	5894.98	2167.66	1.4433	0.00095886	0.012559	OsRCI2-6 - Hydrophobic protein LTI6B, expressed
LOC_Os05g04710	78.141	10.291	2.9247	0.00030704	0.0050299	IRE, putative, expressed
LOC_Os05g04930	1861.15	15.599	6.8986	3.56e-21	2.54e-18	transferase family protein, putative, expressed
LOC_Os05g05080	1353.13	3.82845	8.4653	4.26e-07	1.81e-05	expressed protein
LOC_Os05g05100	171.908	23.3354	2.881	3.18e-07	1.4e-05	expressed protein
LOC_Os05g05110	57.8195	1.73012	5.0626	0.00029135	0.0048205	expressed protein
LOC_Os05g05330	347.731	121.988	1.5112	0.0011216	0.014197	expressed protein
LOC_Os05g05510	41.4058	3.20122	3.6931	2.07e-06	7.12e-05	expressed protein
LOC_Os05g05620	91.2351	10.3528	3.1396	2.35e-07	1.07e-05	glutathione S-transferase, putative, expressed
LOC_Os05g05670	585.725	169.299	1.7906	0.0015625	0.018605	1-aminocyclopropane-1-carboxylate oxidase, putative, expressed
LOC_Os05g05680	20420.4	2096.74	3.2838	5.19e-08	2.79e-06	1-aminocyclopropane-1-carboxylate oxidase, putative, expressed
LOC_Os05g06440	6899.8	2862.71	1.2692	0.0048819	0.04542	dnaJ homolog subfamily B member 11 precursor, putative, expressed
LOC_Os05g06540	935.929	233.391	2.0036	0.0015021	0.018018	expressed protein
LOC_Os05g06710	1137.63	365.385	1.6385	0.00023297	0.0040191	GDSL-like lipase/acylhydrolase, putative, expressed
LOC_Os05g06970	1031.3	2.65442	8.6018	1.84e-06	6.42e-05	peroxidase precursor, putative, expressed
LOC_Os05g07090	1238	510.028	1.2794	0.0035029	0.034975	acyl-coenzyme A dehydrogenase, mitochondrial precursor, putative, expressed
LOC_Os05g07220	821.434	269.68	1.6069	0.00036591	0.0058234	kelch repeat-containing protein, putative, expressed
LOC_Os05g07280	49.8038	7.74915	2.6841	0.0021745	0.024191	expressed protein
LOC_Os05g07450	9.74495	0	Inf	0.00074931	0.010327	S-domain receptor-like protein kinase, putative, expressed
LOC_Os05g07710	62.8189	9.67056	2.6995	0.003997	0.038824	WD40-like domain containing protein, putative, expressed
LOC_Os05g08860	107.198	28.2074	1.9261	0.00051493	0.0076438	expressed protein
LOC_Os05g08890	49.282	3.16652	3.9601	1.9e-07	8.88e-06	transposable element protein, putative, containing Pfam profile: PF03108, MuDR, expressed
LOC_Os05g08900	3477.23	235.084	3.8867	2.91e-15	7.27e-13	expressed protein
LOC_Os05g08910	1257.85	56.2949	4.4818	5.76e-17	2.1e-14	expressed protein
LOC_Os05g09440	1110.2	214	2.3751	0.0014948	0.017955	NADP-dependent malic enzyme, chloroplast precursor, putative, expressed
LOC_Os05g09660	14.4157	1.55321	3.2143	0.0048553	0.045203	HAD superfamily phosphatase, putative, expressed
LOC_Os05g10620	419.971	23.3769	4.1671	2.71e-06	9.02e-05	no apical meristem protein, putative, expressed
LOC_Os05g10650	606.906	208.123	1.544	0.00070502	0.0098442	6-phosphofructokinase, putative, expressed
LOC_Os05g10840	378.059	62.7251	2.5915	0.00085222	0.011456	calmodulin-binding protein, putative, expressed
LOC_Os05g10890	43.1551	0.628903	6.1006	3.65e-05	0.00083621	retrotransposon protein, putative, unclassified, expressed
LOC_Os05g11070	41.6998	0	Inf	0.00097407	0.012689	helix-loop-helix DNA-binding domain containing protein, expressed
LOC_Os05g11840	517.123	196.134	1.3987	0.0028562	0.029739	expressed protein
LOC_Os05g12460	92.205	29.8852	1.6254	0.0027183	0.028633	expressed protein
LOC_Os05g12550	422.764	104.064	2.0224	0.0015164	0.018152	retrotransposon, putative, centromere-specific, expressed
LOC_Os05g13330	1164.76	436.715	1.4153	0.0016179	0.019105	per1-like family protein, putative, expressed
LOC_Os05g13580	9687.07	2515.66	1.9451	2.2e-05	0.00054055	OsCML18 - Calmodulin-related calcium sensor protein, expressed
LOC_Os05g13790	39.6146	8.66665	2.1925	0.0016046	0.018989	expressed protein
LOC_Os05g13804	77.6745	22.4044	1.7937	0.0014591	0.017605	expressed protein
LOC_Os05g13940	648.877	225.329	1.5259	0.00091147	0.012067	retrotransposon protein, putative, unclassified, expressed
LOC_Os05g13970	42.4207	0	Inf	0.0002281	0.0039561	phosphorylase domain containing protein, putative, expressed
LOC_Os05g14360	420.149	142.763	1.5573	0.00076304	0.010458	expressed protein
LOC_Os05g14370	34.2558	0.71101	5.5903	0.00024695	0.0042015	WRKY82, expressed
LOC_Os05g14820	541.847	0.308101	10.78	5.29e-06	0.00016046	transmembrane amino acid transporter protein, putative, expressed
LOC_Os05g15150	533.484	187.635	1.5075	0.0010148	0.013114	leucyl-tRNA synthetase, cytoplasmic, putative, expressed
LOC_Os05g15230	447.995	0.355505	10.299	2.12e-24	3.12e-21	plant protein of unknown function domain containing protein, expressed
LOC_Os05g15300	78.9126	3.33073	4.5663	9.03e-11	9.19e-09	expressed protein
LOC_Os05g15490	8.79544	0	Inf	0.0015014	0.018016	retrotransposon protein, putative, Ty3-gypsy subclass, expressed
LOC_Os05g15530	117.511	12.0406	3.2868	1e-06	3.85e-05	aminotransferase domain containing protein, putative, expressed
LOC_Os05g17604	1645.53	233.733	2.8156	0.00038943	0.0061241	SHR5-receptor-like kinase, putative, expressed
LOC_Os05g19910	3164.88	1052.9	1.5878	0.00049884	0.0074637	transferase family protein, putative, expressed
LOC_Os05g21180	2415.27	497.427	2.2796	0.00046236	0.0070479	phosphatidic acid phosphatase-related, putative, expressed
LOC_Os05g23140	167.173	57.4959	1.5398	0.0020483	0.023017	retrotransposon protein, putative, LINE subclass, expressed
LOC_Os05g23255	25.5736	4.17632	2.6144	0.0015092	0.018079	expressed protein
LOC_Os05g23440	586.243	198.558	1.5619	0.00053317	0.0078559	solute carrier family 35 member F1, putative, expressed
LOC_Os05g24010	4073.92	703.058	2.5347	3.68e-08	2.05e-06	receptor protein kinase-like, putative, expressed
LOC_Os05g24654	41.4696	4.75442	3.1247	2.37e-05	0.00057534	transposon protein, putative, unclassified, expressed
LOC_Os05g24660	448.84	0	Inf	1.73e-05	0.0004415	IPP transferase, putative, expressed
LOC_Os05g24684	5684.5	2142.15	1.408	0.001638	0.019292	structural constituent of ribosome, putative, expressed
LOC_Os05g24770	283.122	0	Inf	2.25e-23	2.68e-20	reticulon domain containing protein, putative, expressed
LOC_Os05g24780	27630.2	12.8616	11.069	8.89e-34	1.06e-29	OsCML21 - Calmodulin-related calcium sensor protein, expressed
LOC_Os05g25040	41.565	3.53812	3.5543	0.0050171	0.046352	expressed protein
LOC_Os05g25210	3270.88	1232.52	1.4081	0.0017817	0.020611	expressed protein
LOC_Os05g25390	883.982	135.381	2.707	0.00059086	0.0085368	tyrosine protein kinase domain containing protein, putative, expressed
LOC_Os05g25640	11415.9	1934.27	2.5612	0.0039595	0.038512	cytochrome P450, putative, expressed
LOC_Os05g25650	489.86	127.108	1.9463	0.00067336	0.009476	expressed protein
LOC_Os05g25770	47257.4	5931.91	2.994	0.0010893	0.013857	WRKY45, expressed
LOC_Os05g25784	53.0221	12.4418	2.0914	0.00086719	0.01161	expressed protein
LOC_Os05g25920	483.259	56.2616	3.1026	5.91e-10	5.06e-08	expressed protein
LOC_Os05g26660	193.014	38.8269	2.3136	0.0014056	0.017096	NADH-ubiquinone oxidoreductase, mitochondrial precursor, putative, expressed
LOC_Os05g27010	3731.37	1397.81	1.4165	0.0014167	0.017195	peptide transporter PTR3-A, putative, expressed
LOC_Os05g27020	38.3126	8.92145	2.1025	0.0022266	0.024633	transposon protein, putative, CACTA, En/Spm sub-class, expressed
LOC_Os05g27050	386.876	131.765	1.5539	0.00089348	0.011881	peptide transporter, putative, expressed
LOC_Os05g27060	115.12	2.22951	5.6903	0.00022972	0.0039783	retrotransposon protein, putative, unclassified, expressed
LOC_Os05g27080	9.51895	0	Inf	0.00091648	0.012124	retrotransposon protein, putative, unclassified, expressed
LOC_Os05g27090	62.9006	8.31115	2.92	6.52e-06	0.0001923	basic helix-loop-helix domain containing protein, expressed
LOC_Os05g27340	454.293	147.89	1.6191	0.00054932	0.0080539	expressed protein
LOC_Os05g27730	31883.7	11034.8	1.5308	0.0009704	0.012678	WRKY53, expressed
LOC_Os05g30280	995.079	129.238	2.9448	5.31e-10	4.64e-08	Os5bglu20 - beta-glucosidase homologue, similar to G. max isohydroxyurate hydrolase, expressed
LOC_Os05g30300	8.16575	0	Inf	0.0024024	0.026165	Os5bglu21 - beta-glucosidase homologue, similar to G. max isohydroxyurate hydrolase, expressed
LOC_Os05g30350	6765.78	751.715	3.17	5.61e-11	6.03e-09	Os5bglu22 - beta-glucosidase homologue, similar to G. max isohydroxyurate hydrolase, expressed
LOC_Os05g30454	800.32	130.102	2.6209	9.08e-07	3.53e-05	thiamin pyrophosphokinase 1, putative, expressed
LOC_Os05g30640	404.375	16.9626	4.5753	4.19e-17	1.56e-14	leucine zipper protein-like, putative, expressed
LOC_Os05g30680	11.473	0.641604	4.1604	0.0025017	0.026976	leucine zipper protein-like, putative, expressed
LOC_Os05g30760	198.103	8.01157	4.628	2.63e-08	1.54e-06	esterase, putative, expressed
LOC_Os05g30950	943.977	328.584	1.5225	0.00075284	0.010345	MSP domain containing protein, putative, expressed
LOC_Os05g30970	1987.45	341.952	2.5391	3.98e-08	2.19e-06	copine, putative, expressed
LOC_Os05g31620	5213.58	210.634	4.6295	1.99e-09	1.5e-07	OsCML15 - Calmodulin-related calcium sensor protein, expressed
LOC_Os05g31740	1845.72	122.349	3.9151	4.77e-10	4.22e-08	cytochrome P450 86A2, putative, expressed
LOC_Os05g32070	55.117	1.55321	5.1492	2.2e-06	7.52e-05	LRP1, putative, expressed
LOC_Os05g32370	329.25	2.16941	7.2457	3.19e-07	1.4e-05	ATP-dependent RNA helicase, putative, expressed
LOC_Os05g32660	774.473	257.463	1.5888	0.00053164	0.0078397	leucine-rich repeat family protein, putative, expressed
LOC_Os05g32860	745.233	36.8555	4.3377	8.82e-06	0.0002501	expressed protein
LOC_Os05g33130	211.767	1.35261	7.2906	0.00093126	0.01227	CHIT17 - Chitinase family protein precursor, expressed
LOC_Os05g33160	1040.51	19.1971	5.7603	4.02e-14	7.98e-12	inactive receptor kinase At1g27190 precursor, putative, expressed
LOC_Os05g33380	4545.44	1829.59	1.3129	0.0028819	0.029963	fructose-bisphospate aldolase isozyme, putative, expressed
LOC_Os05g33400	133.85	0.71101	7.5565	1.16e-05	0.00031154	basic 7S globulin precursor, putative, expressed
LOC_Os05g33514	293.609	102.028	1.5249	0.0014103	0.017134	expressed protein
LOC_Os05g33580	89.8991	3.18852	4.8173	6.1e-12	7.82e-10	expressed protein
LOC_Os05g33940	29037.2	1999.89	3.8599	3.86e-14	7.7e-12	alpha/beta hydrolase fold, putative, expressed
LOC_Os05g34270	4498.54	1695.78	1.4075	0.0017511	0.020359	inactive receptor kinase At1g27190 precursor, putative, expressed
LOC_Os05g34390	41.805	0	Inf	0.0011446	0.014457	protein kinase domain containing protein, expressed
LOC_Os05g34830	1135.82	479.457	1.2443	0.0053145	0.048387	No apical meristem protein, putative, expressed
LOC_Os05g34980	896.37	121.99	2.8773	1.11e-09	8.78e-08	amino acid transporter, putative, expressed
LOC_Os05g35060	974.283	215.776	2.1748	1.39e-05	0.00036509	DUF803 domain containing, putative, expressed
LOC_Os05g35170	24567.7	8132.97	1.5949	0.0003577	0.0057208	no apical meristem protein, putative, expressed
LOC_Os05g35290	2797.09	374.163	2.9022	6.65e-07	2.69e-05	phenylalanine ammonia-lyase, putative, expressed
LOC_Os05g35690	182.271	8.87069	4.3609	2.49e-12	3.45e-10	GASR6 - Gibberellin-regulated GASA/GAST/Snakin family protein precursor, expressed
LOC_Os05g36100	26.8218	0.616202	5.4439	0.0021986	0.024399	AP2 domain containing protein, expressed
LOC_Os05g36140	329.123	19.0575	4.1102	2.09e-11	2.42e-09	expressed protein
LOC_Os05g36350	146.631	44.9585	1.7055	0.00073784	0.010195	pentatricopeptide, putative, expressed
LOC_Os05g37190	649.312	39.5193	4.0383	2.99e-08	1.72e-06	ZOS5-08 - C2H2 zinc finger protein, expressed
LOC_Os05g38140	7305.67	2503.11	1.5453	0.00065203	0.0092524	basic helix-loop-helix DND-binding domain containing protein, expressed
LOC_Os05g38264	1457.78	113.542	3.6825	0.00010399	0.0020468	expressed protein
LOC_Os05g38350	625.643	256.384	1.287	0.0042124	0.040411	glycerol-3-phosphate acyltransferase 8, putative, expressed
LOC_Os05g38460	286.509	87.0256	1.7191	0.00052037	0.0077086	MYB family transcription factor, putative, expressed
LOC_Os05g38700	29.2866	3.13014	3.2259	0.0012893	0.015901	hypothetical protein
LOC_Os05g38710	7650.1	1809.87	2.0796	0.0013542	0.016572	lipin, N-terminal conserved region family protein, expressed
LOC_Os05g38830	3086.03	1052.53	1.5519	0.00044122	0.0068041	HECT-domain domain containing protein, expressed
LOC_Os05g38860	72.0594	2.57232	4.808	8.28e-11	8.49e-09	expressed protein
LOC_Os05g38940	47.5528	11.4337	2.0562	0.0015764	0.018745	expressed protein
LOC_Os05g39130	43.6569	0.308101	7.1467	5.22e-06	0.00015848	retrotransposon protein, putative, unclassified, expressed
LOC_Os05g39150	354.552	127.303	1.4777	0.0013994	0.017043	expressed protein
LOC_Os05g39250	231.222	55.5857	2.0565	3.41e-05	0.00078956	phosphatidylethanolamine-binding protein, putative, expressed
LOC_Os05g39350	2740.56	186.78	3.8751	8.42e-15	1.88e-12	PMR5, putative, expressed
LOC_Os05g39370	107.584	18.5251	2.5379	6.53e-06	0.0001923	expressed protein
LOC_Os05g39410	1982.79	382.287	2.3748	2.44e-07	1.1e-05	expressed protein
LOC_Os05g39610	4986.44	1087.94	2.1964	1.48e-06	5.34e-05	exo70 exocyst complex subunit domain containing protein, expressed
LOC_Os05g39720	3230.87	185.894	4.1194	2.38e-11	2.72e-09	WRKY70, expressed
LOC_Os05g39860	925.889	0.308101	11.553	5.55e-13	8.93e-11	expressed protein
LOC_Os05g40040	2257.68	875.074	1.3674	0.0023323	0.025581	expressed protein
LOC_Os05g40070	288.539	3.15214	6.5163	9.98e-06	0.00027686	WRKY84, expressed
LOC_Os05g40770	2245.32	245.434	3.1935	1.78e-11	2.1e-09	leucine-rich repeat family protein, putative, expressed
LOC_Os05g40810	770.099	151.243	2.3482	1.44e-06	5.22e-05	BRCA1 C Terminus domain containing protein, expressed
LOC_Os05g41180	1001.49	306.867	1.7065	0.00018716	0.0033466	peptidase, T1 family, putative, expressed
LOC_Os05g41290	701.87	171.933	2.0294	1.1e-05	0.00030019	disease resistance RPP13-like protein 1, putative, expressed
LOC_Os05g41370	1217.62	6.87815	7.4678	8.35e-25	1.42e-21	TKL_IRAK_DUF26-la.1 - DUF26 kinases have homology to DUF26 containing loci, expressed
LOC_Os05g41670	575.587	44.7097	3.6864	5.82e-05	0.0012382	ICE-like protease p20 domain containing protein, putative, expressed
LOC_Os05g41780	2978.39	740.882	2.0072	1.06e-05	0.00029065	AP2 domain containing protein, expressed
LOC_Os05g42424	7007.72	2556.19	1.455	0.0011958	0.014961	ubiquitin family protein, putative, expressed
LOC_Os05g43120	250.889	2.85841	6.4557	3.03e-06	9.91e-05	GDSL-like lipase/acylhydrolase, putative, expressed
LOC_Os05g43390	1352.46	307.171	2.1385	2.43e-06	8.18e-05	signal recognition particle 54 kDa protein, putative, expressed
LOC_Os05g43640	16.6026	0.676307	4.6176	0.00014858	0.002772	retrotransposon, putative, centromere-specific, expressed
LOC_Os05g44270	949.094	276.429	1.7796	0.00066891	0.0094245	VQ domain containing protein, putative, expressed
LOC_Os05g44420	2393.62	590.239	2.0198	9.42e-06	0.00026414	expressed protein
LOC_Os05g44430	26.1805	0	Inf	1.77e-05	0.0004503	hypothetical protein
LOC_Os05g44770	3807.79	1102.85	1.7877	8.02e-05	0.0016295	receptor-like protein kinase 5 precursor, putative, expressed
LOC_Os05g45070	1197.16	202.328	2.5648	5.35e-08	2.87e-06	harpin-induced protein 1 domain containing protein, expressed
LOC_Os05g45090	560.073	35.8297	3.9664	2.22e-12	3.14e-10	anthocyanidin 5,3-O-glucosyltransferase, putative, expressed
LOC_Os05g45100	1193.09	0.355505	11.713	7.62e-07	3.04e-05	anthocyanidin 5,3-O-glucosyltransferase, putative, expressed
LOC_Os05g45110	16.2257	2.33702	2.7955	0.0047266	0.044298	anthocyanidin 5,3-O-glucosyltransferase, putative, expressed
LOC_Os05g45170	236.467	3.15721	6.2268	4.18e-21	2.87e-18	glucosyl transferase, putative, expressed
LOC_Os05g45210	1512.08	426.961	1.8244	0.0039074	0.03813	respiratory burst oxidase, putative, expressed
LOC_Os05g45840	1999.05	617.457	1.6949	0.0049633	0.045974	GTPase-activating protein, putative, expressed
LOC_Os05g45880	206.303	7.64754	4.7536	2.15e-05	0.00053076	phosphotransferase, putative, expressed
LOC_Os05g46050	130.284	21.1067	2.6259	1.75e-06	6.16e-05	OsFBDUF26 - F-box and DUF domain containing protein, expressed
LOC_Os05g46190	13.9064	0	Inf	4.23e-05	0.00094197	expressed protein
LOC_Os05g46240	2065.36	284.576	2.8595	3.24e-05	0.00075564	green ripe-like, putative, expressed
LOC_Os05g46260	1890.99	704.336	1.4248	0.0014686	0.017699	exostosin, putative, expressed
LOC_Os05g46750	41.4254	2.52491	4.0362	0.0010926	0.013894	STE_MEKK_ste11_MAP3K.18 - STE kinases include homologs to sterile 7, sterile 11 and sterile 20 from yeast, expressed
LOC_Os05g46760	1617.65	194.908	3.053	6.22e-10	5.28e-08	STE_MEKK_ste11_MAP3K.19 - STE kinases include homologs to sterile 7, sterile 11 and sterile 20 from yeast, expressed
LOC_Os05g46790	474.625	0.320802	10.531	7.62e-08	3.99e-06	expressed protein
LOC_Os05g46840	327.72	11.6436	4.8149	6.87e-07	2.77e-05	proline-rich protein, putative, expressed
LOC_Os05g47630	550.744	193.774	1.507	0.0013413	0.016436	peptidyl-tRNA hydrolase, mitochondrial precursor protein, putative, expressed
LOC_Os05g47660	609.869	192.539	1.6633	0.00026067	0.0043971	lipid phosphatase protein, putative, expressed
LOC_Os05g47770	3300.42	173.943	4.246	1.69e-10	1.62e-08	serine/threonine-protein kinase At1g18390 precursor, putative, expressed
LOC_Os05g47880	711.913	138.072	2.3663	8.4e-05	0.0016936	hypro1, putative, expressed
LOC_Os05g47960	858.964	12.7049	6.0791	9.49e-20	5.47e-17	expressed protein
LOC_Os05g48010	1746.44	210.729	3.051	2.65e-05	0.00063444	MYB family transcription factor, putative, expressed
LOC_Os05g48210	3245.32	1042.45	1.6384	0.00029369	0.004849	expressed protein
LOC_Os05g48230	849.326	281.07	1.5954	0.00039258	0.0061697	expressed protein
LOC_Os05g48260	442.12	64.9233	2.7676	1.6e-07	7.67e-06	wax synthase, putative, expressed
LOC_Os05g48660	4306.29	475.91	3.1777	1.7e-11	2.03e-09	MRH1, putative, expressed
LOC_Os05g48670	923.438	228.213	2.0166	0.00026287	0.0044277	OsFBT10 - F-box and tubby domain containing protein, expressed
LOC_Os05g48680	183.596	40.3741	2.185	0.0011497	0.014501	expressed protein
LOC_Os05g48690	5328.48	1953.13	1.4479	0.0012355	0.015356	transcription factor like protein, putative, expressed
LOC_Os05g48890	25.8288	0	Inf	9.87e-06	0.00027485	fasciclin domain containing protein, expressed
LOC_Os05g48930	3339.56	352.278	3.2449	9.83e-09	6.45e-07	OsGrx_S2 - glutaredoxin subgroup III, expressed
LOC_Os05g48980	1818.88	295.53	2.6217	1.79e-08	1.09e-06	ras-related protein, putative, expressed
LOC_Os05g49080	103.56	32.5896	1.668	0.0015284	0.018273	expressed protein
LOC_Os05g49100	261.964	30.5395	3.1006	0.0008835	0.011788	WRKY49, expressed
LOC_Os05g49630	275.232	80.7685	1.7688	0.00031498	0.0051434	expressed protein
LOC_Os05g49670	113.166	35.3641	1.6781	0.0017807	0.020606	expressed protein
LOC_Os05g49900	949.936	33.2793	4.8351	3.55e-08	1.99e-06	3-ketoacyl-CoA synthase, putative, expressed
LOC_Os05g49940	1490.24	205.911	2.8554	1.09e-09	8.66e-08	expressed protein
LOC_Os05g49960	16.1385	0	Inf	9.9e-06	0.00027556	expressed protein
LOC_Os05g50090	899.449	321.253	1.4853	0.0013629	0.016661	oxidoreductase, 2OG-FeII oxygenase domain containing protein, putative, expressed
LOC_Os05g50100	12325.7	1253.63	3.2975	3.73e-07	1.6e-05	expressed protein
LOC_Os05g50110	44.5042	11.217	1.9883	0.0024548	0.02663	oleosin, putative, expressed
LOC_Os05g50180	301.479	11.636	4.6954	2.05e-08	1.23e-06	OsCML14 - Calmodulin-related calcium sensor protein, expressed
LOC_Os05g50380	384.556	156.146	1.3003	0.0044858	0.042555	glucose-1-phosphate adenylyltransferase large subunit, chloroplast precursor, putative, expressed
LOC_Os05g50570	59.7159	1.66071	5.1682	1.59e-10	1.54e-08	OsSCP29 - Putative Serine Carboxypeptidase homologue, expressed
LOC_Os05g50580	2282.05	5.56024	8.681	1.63e-22	1.57e-19	OsSCP30 - Putative Serine Carboxypeptidase homologue, expressed
LOC_Os05g50610	1570.89	65.8358	4.5766	4.49e-19	2.23e-16	WRKY8, expressed
LOC_Os05g50730	13.5516	0.663606	4.352	0.00088388	0.011789	expressed protein
LOC_Os05g50770	51.5188	0.355505	7.1791	4.57e-05	0.0010049	C4-dicarboxylate transporter/malic acid transport protein, expressed
LOC_Os05g50820	92.7657	29.8877	1.634	0.0024593	0.026639	expressed protein
LOC_Os05g50910	17.3428	0.971707	4.1577	0.0002648	0.0044521	extra-large G-protein-related, putative, expressed
LOC_Os05g51520	688.508	214.013	1.6858	0.00020234	0.0035628	expressed protein
LOC_Os05g51590	10791.7	4614.03	1.2258	0.0052387	0.04789	N-rich protein, putative, expressed
LOC_Os05g51670	1963.55	684.481	1.5204	0.00063598	0.0090787	NAD dependent epimerase/dehydratase family protein, putative, expressed
LOC_Os05g51780	76.8083	7.65266	3.3272	1.21e-07	6.04e-06	zinc finger, C3HC4 type domain containing protein, expressed
LOC_Os06g01760	220.297	35.4073	2.6373	7e-06	0.00020377	ligA, putative, expressed
LOC_Os06g02170	648.325	245.457	1.4012	0.0021104	0.023588	DNAJ heat shock N-terminal domain-containing protein, putative, expressed
LOC_Os06g02180	2021.59	561.441	1.8483	4.23e-05	0.00094197	CSLD2 - cellulose synthase-like family D, expressed
LOC_Os06g02520	65.7325	0	Inf	4.81e-08	2.61e-06	interacting protein of DMI3, putative, expressed
LOC_Os06g03580	7330.39	2460.97	1.5747	0.0017326	0.02022	zinc RING finger protein, putative, expressed
LOC_Os06g03810	1516.71	104.738	3.8561	0.0014839	0.017854	expressed protein
LOC_Os06g04070	8532.18	1735.09	2.2979	3.4e-06	0.0001099	pyridoxal-dependent decarboxylase protein, putative, expressed
LOC_Os06g04220	814.529	23.8567	5.0935	2.29e-06	7.78e-05	expressed protein
LOC_Os06g04230	789.707	145.561	2.4397	1.58e-06	5.6e-05	expressed protein
LOC_Os06g04240	605.788	49.9844	3.5993	5.14e-07	2.14e-05	expressed protein
LOC_Os06g04280	4665.26	1493.98	1.6428	0.0031975	0.032572	3-phosphoshikimate 1-carboxyvinyltransferase, chloroplast precursor, putative, expressed
LOC_Os06g04360	97.5278	30.7884	1.6634	0.0016594	0.019502	expressed protein
LOC_Os06g04460	1256.61	490.738	1.3565	0.0023503	0.025723	hypersensitive-induced response protein, putative, expressed
LOC_Os06g04900	363.672	72.5568	2.3255	1.38e-06	5.02e-05	transporter family protein, putative, expressed
LOC_Os06g05130	1610.41	570.545	1.497	0.0010384	0.013337	myristoyl-acyl carrier protein thioesterase, chloroplast precursor, putative, expressed
LOC_Os06g05284	715.499	16.894	5.4044	4.16e-21	2.87e-18	transferase family protein, putative, expressed
LOC_Os06g05300	128.061	4.41162	4.8594	7.27e-09	4.89e-07	transferase family protein, putative, expressed
LOC_Os06g05310	101.46	12.1921	3.0569	2.34e-07	1.07e-05	transferase family protein, putative, expressed
LOC_Os06g05320	174.802	17.6973	3.3041	1.67e-08	1.03e-06	transferase family protein, putative, expressed
LOC_Os06g05410	364.753	5.90132	5.9497	1.24e-08	7.93e-07	expressed protein
LOC_Os06g05420	293.711	7.72792	5.2482	6.38e-05	0.0013401	expressed protein
LOC_Os06g05424	66.4063	2.15671	4.9444	1.85e-10	1.76e-08	expressed protein
LOC_Os06g05450	1240.33	339.675	1.8685	0.00095875	0.012559	expressed protein
LOC_Os06g05470	336.29	4.36422	6.2678	5.32e-16	1.65e-13	expressed protein
LOC_Os06g05480	2890.59	800.374	1.8526	3.57e-05	0.00082126	expressed protein
LOC_Os06g05510	8.59954	0	Inf	0.0018263	0.021039	expressed protein
LOC_Os06g05700	3794.94	1572.94	1.2706	0.00344	0.034437	cysteine synthase, putative, expressed
LOC_Os06g05940	1669.01	314.788	2.4065	1.37e-07	6.75e-06	DTA2, putative, expressed
LOC_Os06g06130	1220.4	6.56833	7.5376	6.9e-24	8.51e-21	glutamate receptor, putative, expressed
LOC_Os06g06140	110.229	0	Inf	6.41e-16	1.94e-13	hypothetical protein
LOC_Os06g06220	42.6526	7.84473	2.4428	0.00081925	0.011105	hypothetical protein
LOC_Os06g06350	3547.09	557.526	2.6695	7.65e-05	0.0015645	AMP-binding enzyme, putative, expressed
LOC_Os06g06750	16.3918	0	Inf	1.04e-05	0.00028533	OsMADS5 - MADS-box family gene with MIKCc type-box, expressed
LOC_Os06g06910	298.612	117.378	1.3471	0.0045883	0.043322	expressed protein
LOC_Os06g06950	50.1295	6.00293	3.0619	1.17e-05	0.00031389	expressed protein
LOC_Os06g07200	6782.39	1756.82	1.9488	1.44e-05	0.00037672	syntaxin, putative, expressed
LOC_Os06g07330	7.75212	0	Inf	0.0031469	0.032157	OsWAK63 - OsWAK receptor-like protein kinase, expressed
LOC_Os06g07340	220.228	6.63773	5.0522	2.33e-12	3.26e-10	hypothetical protein
LOC_Os06g07420	91.4009	0	Inf	2.58e-12	3.56e-10	retrotransposon protein, putative, unclassified, expressed
LOC_Os06g08060	52.749	6.91625	2.9311	1.38e-05	0.00036336	leucoanthocyanidin dioxygenase, putative, expressed
LOC_Os06g08310	112.006	29.842	1.9082	0.00037402	0.0059366	plasma membrane ATPase, putative, expressed
LOC_Os06g08350	81.5874	5.57634	3.871	1.73e-08	1.06e-06	expressed protein
LOC_Os06g08400	2373.63	801.379	1.5665	0.00046554	0.0070858	LIM domain-containing protein, putative, expressed
LOC_Os06g08880	2628.13	76.8954	5.095	3.07e-06	0.00010061	glutamate receptor 2.7 precursor, putative, expressed
LOC_Os06g09190	29.964	0.308101	6.6037	0.0026492	0.028141	mitogen-activated protein kinase kinase 5, putative, expressed
LOC_Os06g09310	1004.41	81.6691	3.6204	4.5e-05	0.00099265	zinc finger, C3HC4 type domain containing protein, expressed
LOC_Os06g09320	1443.59	471.153	1.6154	0.00034229	0.0055163	expressed protein
LOC_Os06g09370	1804.34	707.918	1.3498	0.0025184	0.027114	PTF1, putative, expressed
LOC_Os06g09620	189.869	13.3204	3.8333	1.32e-08	8.37e-07	expressed protein
LOC_Os06g09660	477.121	186.32	1.3566	0.0029867	0.030846	auxin response factor, putative, expressed
LOC_Os06g09940	203.748	34.9655	2.5428	6.34e-07	2.57e-05	expressed protein
LOC_Os06g09950	430.429	116.178	1.8894	6.3e-05	0.0013245	expressed protein
LOC_Os06g09960	411.647	39.3863	3.3856	2.66e-09	1.96e-07	expressed protein
LOC_Os06g09970	27.5919	4.10352	2.7493	0.00085467	0.011476	expressed protein
LOC_Os06g09980	666.771	24.208	4.7836	6.05e-19	2.96e-16	expressed protein
LOC_Os06g09990	1242.25	62.3246	4.317	1.89e-16	6.31e-14	expressed protein
LOC_Os06g10040	29.4723	4.44972	2.7276	0.00059717	0.0086107	expressed protein
LOC_Os06g10210	625.202	142.75	2.1308	7.76e-06	0.00022403	expressed protein
LOC_Os06g10520	2065.44	340.297	2.6016	0.0001752	0.0031677	pantothenate kinase, putative, expressed
LOC_Os06g10580	6702.46	2228.85	1.5884	0.00043997	0.0067904	cyclic nucleotide-gated ion channel, putative, expressed
LOC_Os06g10790	1420.17	68.8146	4.3672	3.58e-18	1.54e-15	lectin-like receptor kinase, putative, expressed
LOC_Os06g10800	46.2806	4.50475	3.3609	2.24e-06	7.63e-05	zinc finger family protein, putative, expressed
LOC_Os06g10850	46.2384	3.85212	3.5854	0.0045937	0.043348	lipase, putative, expressed
LOC_Os06g11090	400.982	54.2591	2.8856	7.1e-09	4.83e-07	CXE carboxylesterase, putative, expressed
LOC_Os06g11210	212.449	0.949704	7.8054	5.96e-24	7.61e-21	12-oxophytodienoate reductase, putative, expressed
LOC_Os06g11240	1862.56	185.671	3.3265	8.12e-10	6.71e-08	12-oxophytodienoate reductase, putative, expressed
LOC_Os06g11450	2364.84	346.745	2.7698	1.63e-07	7.83e-06	zinc finger, C3HC4 type domain containing protein, expressed
LOC_Os06g11610	362.183	133.602	1.4388	0.0026365	0.02804	heat shock 22 kDa protein, mitochondrial precursor, putative, expressed
LOC_Os06g11720	215.825	17.0549	3.6616	0.00012475	0.0023916	cytokinin-O-glucosyltransferase 2, putative, expressed
LOC_Os06g11730	260.999	0.320802	9.6681	1.6e-08	1e-06	RNA recognition motif containing protein, putative, expressed
LOC_Os06g11840	230.531	3.48732	6.0467	0.00012064	0.0023272	trehalose phosphatase, putative, expressed
LOC_Os06g12120	3069.17	1001.79	1.6153	0.00060554	0.0087138	BRASSINOSTEROID INSENSITIVE 1-associated receptor kinase 1 precursor, putative, expressed
LOC_Os06g12150	524.917	45.8769	3.5163	2.4e-07	1.09e-05	shikimate kinase, putative, expressed
LOC_Os06g12380	174.644	19.2395	3.1823	3.58e-05	0.00082126	expressed protein
LOC_Os06g12390	4807.52	1089.86	2.1411	2.88e-06	9.55e-05	galactosyltransferase family protein, putative, expressed
LOC_Os06g12560	141.446	16.2685	3.1201	2.28e-08	1.35e-06	zinc finger, C3HC4 type, domain containing protein, expressed
LOC_Os06g13080	2807.76	822.854	1.7707	8.75e-05	0.0017611	spotted leaf 11, putative, expressed
LOC_Os06g13120	20.23	2.59772	2.9612	0.0015995	0.018957	expressed protein
LOC_Os06g13180	378.724	13.8748	4.7706	8.82e-06	0.00025013	metalloendoproteinase 1 precursor, putative, expressed
LOC_Os06g13190	4342.01	1641.97	1.4029	0.0035741	0.035568	expressed protein
LOC_Os06g13880	543.865	12.4662	5.4471	0.00024729	0.0042052	expressed protein
LOC_Os06g13940	232.19	1.33991	7.437	0.00018817	0.0033611	expressed protein
LOC_Os06g14190	3268.26	1149.32	1.5077	0.00075142	0.010342	NF-X1-type zinc finger protein, putative, expressed
LOC_Os06g14260	673.135	83.9039	3.0041	8.11e-10	6.71e-08	lectin-like receptor kinase, putative, expressed
LOC_Os06g14490	653.473	135.789	2.2668	1.58e-06	5.6e-05	calmodulin-binding heat-shock protein, putative, expressed
LOC_Os06g15610	140.185	0	Inf	1.42e-22	1.41e-19	hypothetical protein
LOC_Os06g15620	39.9108	10.225	1.9647	0.0032937	0.033352	GASR7 - Gibberellin-regulated GASA/GAST/Snakin family protein precursor, expressed
LOC_Os06g15910	564.416	154.671	1.8676	6.88e-05	0.0014303	potassium transporter, putative, expressed
LOC_Os06g16390	695.513	240.74	1.5306	0.0008283	0.011206	SET domain containing protein, expressed
LOC_Os06g17285	1812.94	739.732	1.2933	0.0040209	0.038988	protein kinase, putative, expressed
LOC_Os06g18820	836.882	178.734	2.2272	1.68e-06	5.93e-05	serine threonine kinase, putative, expressed
LOC_Os06g18920	18.8147	1.06651	4.1409	0.00011656	0.0022606	expressed protein
LOC_Os06g18960	749.887	21.8177	5.1031	4.54e-21	3.06e-18	embryogenesis transmembrane protein, putative, expressed
LOC_Os06g19070	207.852	0.320802	9.3397	5.97e-22	4.85e-19	cytochrome P450, putative, expressed
LOC_Os06g19730	17996.1	6467.47	1.4764	0.00092428	0.012214	HEAT repeat family protein, putative, expressed
LOC_Os06g20790	2302.53	119.246	4.2712	1.7e-08	1.05e-06	SAM dependent carboxyl methyltransferase, putative, expressed
LOC_Os06g20800	326.515	0.949704	8.4255	2.13e-13	3.66e-11	transposon protein, putative, CACTA, En/Spm sub-class, expressed
LOC_Os06g20810	411.739	2.31162	7.4767	2.94e-08	1.7e-06	transposon protein, putative, CACTA, En/Spm sub-class, expressed
LOC_Os06g20900	72.4332	7.83883	3.2079	0.00085464	0.011476	expressed protein
LOC_Os06g21820	7588.11	1988.99	1.9317	1.54e-05	0.00039824	jasmonate O-methyltransferase, putative, expressed
LOC_Os06g22100	313.771	7.93364	5.3056	3.82e-05	0.00086847	DNA binding protein, putative, expressed
LOC_Os06g23114	432.124	63.9662	2.7561	0.0030851	0.031634	copper methylamine oxidase precursor, putative, expressed
LOC_Os06g23760	27.0331	0	Inf	0.00014873	0.0027732	acyl-CoA oxidase, putative, expressed
LOC_Os06g23780	13.8599	0	Inf	0.00075301	0.010345	glutaryl-CoA dehydrogenase, mitochondrial precursor, putative, expressed
LOC_Os06g25010	157.143	8.93415	4.1366	0.0035275	0.035191	glycosyl hydrolase, putative, expressed
LOC_Os06g25130	27.3993	4.42772	2.6295	0.0013291	0.016332	expressed protein
LOC_Os06g25250	504.993	67.0318	2.9133	1.89e-08	1.14e-06	endoribonuclease Dicer, putative, expressed
LOC_Os06g25420	120.5	5.86662	4.3604	2.53e-10	2.32e-08	expressed protein
LOC_Os06g27560	4595.74	906.029	2.3427	3.43e-06	0.00011053	glycosyltransferase protein, putative, expressed
LOC_Os06g28550	145.532	26.1228	2.478	0.0010638	0.013605	nmrA-like family domain containing protein, expressed
LOC_Os06g29220	35.5216	3.90293	3.1861	4.58e-05	0.0010063	erythronate-4-phosphate dehydrogenase domain containing protein, expressed
LOC_Os06g29380	4627.93	1885.35	1.2955	0.0038819	0.037943	phospholipid-transporting ATPase, putative, expressed
LOC_Os06g29844	2495.08	686.82	1.8611	4.12e-05	0.00092313	MATE efflux family protein, putative, expressed
LOC_Os06g30400	1153.17	45.2438	4.6717	1.59e-19	8.87e-17	expressed protein
LOC_Os06g30640	107.888	20.604	2.3885	1.37e-05	0.00036149	cytochrome P450, putative, expressed
LOC_Os06g30920	302.72	34.7091	3.1246	0.00065168	0.0092511	expressed protein
LOC_Os06g32360	49.8871	8.72676	2.5151	0.00016293	0.0029867	expressed protein
LOC_Os06g33170	756.336	80.3318	3.235	3.36e-07	1.46e-05	exocyst complex component 6, putative, expressed
LOC_Os06g33180	4528.42	1633.66	1.4709	0.0024375	0.026475	expressed protein
LOC_Os06g33880	1759.78	6.96366	7.9813	1.95e-05	0.00048869	expressed protein
LOC_Os06g33970	877.53	154.651	2.5044	1.86e-07	8.7e-06	VQ domain containing protein, putative, expressed
LOC_Os06g34360	107.127	5.66942	4.24	1.78e-05	0.00045106	zinc finger, C3HC4 type domain containing protein, expressed
LOC_Os06g34610	164.088	0	Inf	7.85e-05	0.0016004	expressed protein
LOC_Os06g34870	215.131	0.71101	8.2411	0.00033954	0.0054794	Zinc finger, C3HC4 type domain containing protein, expressed
LOC_Os06g34960	348.168	61.2701	2.5065	3.77e-07	1.62e-05	TKL_IRAK_DUF26.1 - DUF26 kinases have homology to DUF26 containing loci, expressed
LOC_Os06g34970	660.785	176.566	1.904	4.47e-05	0.00098715	expressed protein
LOC_Os06g35060	1712.55	285.035	2.5869	1.26e-08	8.01e-07	heavy metal-associated domain containing protein, expressed
LOC_Os06g35410	1104.95	354.574	1.6398	0.00027303	0.004569	growth regulator related protein, putative, expressed
LOC_Os06g35540	1844.76	699.287	1.3995	0.001766	0.020468	aminotransferase, classes I and II, domain containing protein, expressed
LOC_Os06g35650	451.349	1.84861	7.9317	1.69e-05	0.00043267	reticuline oxidase-like protein precursor, putative, expressed
LOC_Os06g35700	685.773	7.82786	6.453	3.62e-08	2.02e-06	reticuline oxidase-like protein precursor, putative, expressed
LOC_Os06g36270	6490.09	2366.54	1.4555	0.0012079	0.015061	receptor-like protein kinase 5 precursor, putative, expressed
LOC_Os06g36560	94.6418	4.16195	4.5071	0.0015792	0.018772	inositol oxygenase, putative, expressed
LOC_Os06g36990	1738.91	717.367	1.2774	0.0036666	0.036345	phospholipid-transporting ATPase 4, putative, expressed
LOC_Os06g37224	1783.97	27.5524	6.0168	7.39e-05	0.0015207	cytochrome P450, putative, expressed
LOC_Os06g37280	134.072	5.76423	4.5397	0.0026467	0.028123	expressed protein
LOC_Os06g37620	1807.72	591.716	1.6112	0.0022407	0.024766	protein kinase family protein, putative, expressed
LOC_Os06g37700	18.6759	0	Inf	2.27e-06	7.72e-05	expressed protein
LOC_Os06g38110	552.152	90.0261	2.6167	2.51e-05	0.0006064	expressed protein
LOC_Os06g38115	126.642	4.83063	4.7124	0.00092964	0.012253	expressed protein
LOC_Os06g38190	316.32	44.0443	2.8444	0.0043425	0.041405	expressed protein
LOC_Os06g38320	2275.3	661.101	1.7831	0.00010529	0.0020702	expressed protein
LOC_Os06g38590	65.4852	3.74461	4.1283	9.75e-09	6.41e-07	receptor-like protein kinase precursor, putative, expressed
LOC_Os06g38660	2056.47	169.153	3.6038	8.5e-05	0.0017133	expressed protein
LOC_Os06g38670	392.885	13.1486	4.9011	1.98e-15	5.13e-13	receptor-like protein kinase precursor, putative, expressed
LOC_Os06g38750	38.0835	0.616202	5.9496	0.00022575	0.0039229	proline-rich family protein, putative, expressed
LOC_Os06g38770	318.012	29.3536	3.4375	9.15e-06	0.00025827	expressed protein
LOC_Os06g38780	1101.17	126.175	3.1255	0.00086347	0.011568	receptor-like protein kinase 2 precursor, putative, expressed
LOC_Os06g38950	7499.22	115.531	6.0204	1.97e-15	5.13e-13	ABC transporter, ATP-binding protein, putative, expressed
LOC_Os06g38970	2562.82	637.488	2.0073	8.09e-06	0.00023238	expressed protein
LOC_Os06g38980	60.5085	0.616202	6.6176	3.15e-05	0.00073757	polyadenylate-binding protein, putative, expressed
LOC_Os06g39020	8.33336	0	Inf	0.0045988	0.043351	retrotransposon protein, putative, unclassified, expressed
LOC_Os06g39110	4888.65	676.931	2.8524	9.76e-06	0.00027221	expressed protein
LOC_Os06g39140	3918.72	1385.66	1.4998	0.00068301	0.0095823	hemoglobin-like protein HbO, putative, expressed
LOC_Os06g39470	2848.57	754.62	1.9164	3.06e-05	0.00071994	transferase family protein, putative, expressed
LOC_Os06g39780	1726.61	22.3333	6.2726	3.59e-07	1.55e-05	cytochrome P450, putative, expressed
LOC_Os06g39880	2547.91	452.251	2.4941	0.0029572	0.030613	cytochrome P450 72A1, putative, expressed
LOC_Os06g40070	11.3523	0	Inf	0.0040133	0.038951	NADP-dependent oxidoreductase, putative, expressed
LOC_Os06g41100	2316.83	203.877	3.5064	1.28e-05	0.0003395	transcription factor, putative, expressed
LOC_Os06g41500	33.7787	0.984407	5.1007	0.00011641	0.0022589	D-mannose binding lectin family protein, expressed
LOC_Os06g41600	284.406	8.86724	5.0033	7.54e-14	1.37e-11	expressed protein
LOC_Os06g41640	781.113	276.862	1.4964	0.00085566	0.011485	CC-NBS-LRR protein, putative, expressed
LOC_Os06g41770	4814.49	1059.75	2.1837	1.84e-05	0.00046505	bZIP transcription factor domain containing protein, expressed
LOC_Os06g43000	137.383	0	Inf	7.26e-05	0.0014975	nitrate-induced NOI protein, expressed
LOC_Os06g43080	246.183	2.03822	6.9163	1.73e-06	6.08e-05	expressed protein
LOC_Os06g43090	225.805	34.6438	2.7044	0.00047212	0.0071477	MYB transcription factor TaMYB1, putative, expressed
LOC_Os06g43384	341.232	21.1864	4.0095	0.00088584	0.011806	cytochrome P450, putative, expressed
LOC_Os06g43780	588.699	8.29594	6.149	2.72e-25	5.72e-22	expressed protein
LOC_Os06g44040	518.923	91.0446	2.5109	1.23e-07	6.13e-06	DOMON domain containing protein, expressed
LOC_Os06g44160	5182.38	1272.11	2.0264	0.0014957	0.017959	heat shock protein DnaJ, putative, expressed
LOC_Os06g44170	12306.2	2591.8	2.2474	0.0054615	0.049336	NAD dependent epimerase/dehydratase family protein, putative, expressed
LOC_Os06g44180	4693.44	1386.15	1.7596	7.12e-05	0.0014742	NAD dependent epimerase/dehydratase family protein, putative, expressed
LOC_Os06g44210	2372.4	957.632	1.3088	0.003181	0.03246	protein phosphatase 2C, putative, expressed
LOC_Os06g44250	331.983	36.3899	3.1895	0.0033764	0.033966	haemolysin-III, putative, expressed
LOC_Os06g44270	1990.36	777.403	1.3563	0.0026186	0.02793	synthase, putative, expressed
LOC_Os06g45020	1035.59	331.791	1.6421	0.00026302	0.0044277	STRUBBELIG-RECEPTOR FAMILY 3 precursor, putative, expressed
LOC_Os06g45110	830.725	170.872	2.2815	1.02e-06	3.88e-05	DNA binding protein, putative, expressed
LOC_Os06g45184	43.8373	6.92555	2.6622	0.00097917	0.012751	retrotransposon protein, putative, Ty3-gypsy subclass, expressed
LOC_Os06g45500	1694.72	538.667	1.6536	0.0002002	0.0035286	copper-transporting ATPase, putative, expressed
LOC_Os06g45570	13409.5	3372.31	1.9914	8.16e-06	0.00023369	VQ domain containing protein, putative, expressed
LOC_Os06g45630	244.208	43.1294	2.5014	0.0016049	0.018989	expressed protein
LOC_Os06g45650	212.907	51.2662	2.0541	0.0022079	0.024477	OsMADS30 - MADS-box family gene with MIKCc type-box, expressed
LOC_Os06g45890	685.928	50.8447	3.7539	0.00058933	0.0085183	MYB family transcription factor, putative, expressed
LOC_Os06g45960	1657.18	179.2	3.2091	0.0040845	0.039417	cytochrome P450, putative, expressed
LOC_Os06g46090	33.1423	0	Inf	0.0028312	0.029548	expressed protein
LOC_Os06g46160	4172.34	116.311	5.1648	0.00032769	0.0053242	expressed protein
LOC_Os06g46270	598.995	54.652	3.4542	0.00095215	0.012481	no apical meristem protein, putative, expressed
LOC_Os06g46310	2004.82	642.112	1.6426	0.00029892	0.0049217	metal transporter Nramp6, putative, expressed
LOC_Os06g46330	1476.13	421.752	1.8073	0.00058365	0.0084533	Protein kinase domain containing protein, expressed
LOC_Os06g46340	2488.08	212.34	3.5506	0.0010308	0.013254	glycosyl hydrolase, family 31, putative, expressed
LOC_Os06g46740	241.392	7.23706	5.0598	0.00023456	0.0040407	early nodulin 20 precursor, putative, expressed
LOC_Os06g46799	172.435	47.7078	1.8538	0.00024276	0.0041539	peroxidase precursor, putative, expressed
LOC_Os06g46950	3444.35	249.07	3.7896	2.1e-07	9.73e-06	EF hand family protein, putative, expressed
LOC_Os06g47200	3974.85	402.851	3.3026	2.48e-12	3.45e-10	LTPL85 - Protease inhibitor/seed storage/LTP family protein precursor, expressed
LOC_Os06g47470	1816.48	295.729	2.6188	2.2e-08	1.3e-06	TKL_IRAK_DUF26-lh.2 - DUF26 kinases have homology to DUF26 containing loci, expressed
LOC_Os06g47530	2568.39	641.911	2.0004	1.2e-05	0.00032163	TKL_IRAK_DUF26-lh.6 - DUF26 kinases have homology to DUF26 containing loci, expressed
LOC_Os06g47560	46.938	0.355505	7.0447	0.00080853	0.011006	expressed protein
LOC_Os06g47720	29.5766	3.23932	3.1907	0.00013492	0.0025544	serine/threonine-protein kinase BRI1-like 2 precursor, putative, expressed
LOC_Os06g48240	1664.82	15.0361	6.7908	7.53e-16	2.19e-13	AAA ATPase, putative, expressed
LOC_Os06g48250	2536.47	292.396	3.1168	3.38e-11	3.79e-09	ATPase, putative, expressed
LOC_Os06g48300	925.867	301.668	1.6178	0.00041916	0.00652	protein phosphatase 2C, putative, expressed
LOC_Os06g48310	34.7312	5.05662	2.78	0.0026191	0.02793	RNA recognition motif containing protein, expressed
LOC_Os06g48520	405.652	24.6136	4.0427	1.63e-14	3.48e-12	disease resistance protein RPM1, putative, expressed
LOC_Os06g48680	3469.45	1522.17	1.1886	0.0054846	0.049469	expressed protein
LOC_Os06g49240	104.369	5.55434	4.2319	7.24e-07	2.9e-05	PTR-like peptide transporter, putatuve, expressed
LOC_Os06g49700	3724.9	1320.85	1.4957	0.0010245	0.013209	expressed protein
LOC_Os06g49710	264.763	71.479	1.8891	0.00011852	0.0022912	expressed protein
LOC_Os06g49800	2147.3	852.127	1.3334	0.0026063	0.027885	ubiquitin interaction motif family protein, expressed
LOC_Os06g50180	481.564	68.0348	2.8234	0.0015006	0.018012	DUF803 domain containing, putative, expressed
LOC_Os06g50200	52.8344	7.91164	2.7394	0.00056191	0.0081948	retrotransposon protein, putative, unclassified, expressed
LOC_Os06g50210	27.5685	2.24221	3.62	5.18e-05	0.0011231	expressed protein
LOC_Os06g50920	329.417	109.601	1.5877	0.00075234	0.010343	protein kinase family protein, putative, expressed
LOC_Os06g51050	879.276	3.58212	7.9394	3.03e-06	9.91e-05	CHIT7 - Chitinase family protein precursor, expressed
LOC_Os06g51210	924.332	16.1669	5.8373	0.00018603	0.0033299	zinc finger family protein, putative, expressed
LOC_Os07g01560	8387.59	3442.77	1.2847	0.0031428	0.032141	transporter family protein, putative, expressed
LOC_Os07g01660	1346.84	247.824	2.4422	4.14e-07	1.77e-05	dirigent, putative, expressed
LOC_Os07g01750	642.269	70.135	3.195	0.0019022	0.021709	MATE efflux family protein, putative, expressed
LOC_Os07g02260	143.787	51.1612	1.4908	0.0026096	0.027895	expressed protein
LOC_Os07g02570	732.675	25.7062	4.833	3.64e-05	0.00083474	NB-ARC domain containing protein, expressed
LOC_Os07g02580	247.644	42.5943	2.5395	3.85e-06	0.0001225	ubiquinone oxidoreductase, putative, expressed
LOC_Os07g02590	827.472	234.843	1.817	0.0020549	0.023084	expressed protein
LOC_Os07g02610	138.536	0.308101	8.8126	5.55e-08	2.96e-06	expressed protein
LOC_Os07g02630	187.92	11.3956	4.0436	0.00082815	0.011206	expressed protein
LOC_Os07g02660	281.485	23.3008	3.5946	1.18e-05	0.00031576	expressed protein
LOC_Os07g02674	57.8575	2.99132	4.2736	7.98e-09	5.33e-07	expressed protein
LOC_Os07g02690	50.7352	1.5405	5.0415	0.00075036	0.010332	DUF538 domain containing protein, putative, expressed
LOC_Os07g02990	19.1283	1.99082	3.2643	0.00099525	0.012927	expressed protein
LOC_Os07g03020	729.96	106.596	2.7757	4.01e-08	2.21e-06	expressed protein
LOC_Os07g03030	3413.74	1148.17	1.572	0.00054547	0.0080107	expressed protein
LOC_Os07g03170	700.594	157.006	2.1578	0.001207	0.015059	expressed protein
LOC_Os07g03730	4464.48	0.628903	12.793	1.02e-09	8.18e-08	SCP-like extracellular protein, expressed
LOC_Os07g03780	34.3658	0.641604	5.7431	2.84e-08	1.65e-06	lectin-like receptor kinase, putative, expressed
LOC_Os07g03790	100.458	0	Inf	1.47e-05	0.00038359	lectin-like receptor kinase 7, putative, expressed
LOC_Os07g03900	839.246	91.1496	3.2028	1.41e-09	1.09e-07	lectin-like receptor kinase, putative, expressed
LOC_Os07g03930	342.134	77.0215	2.1512	3.37e-05	0.00078107	lectin-like receptor kinase, putative, expressed
LOC_Os07g03950	236.36	65.405	1.8535	0.00018451	0.0033059	lectin-like receptor kinase, putative, expressed
LOC_Os07g04000	87.1375	1.60061	5.7666	7.33e-07	2.93e-05	lectin-like receptor kinase, putative, expressed
LOC_Os07g04040	500.049	5.97585	6.3868	7.08e-09	4.83e-07	expressed protein
LOC_Os07g04220	1225.4	311.33	1.9767	1.12e-05	0.00030356	wound and phytochrome signaling involved receptor like kinase, putative, expressed
LOC_Os07g04560	1303.71	1.87401	9.4423	3.36e-09	2.42e-07	no apical meristem protein, putative, expressed
LOC_Os07g04820	263.442	5.37063	5.6163	3.43e-05	0.00079458	protein kinase, putative, expressed
LOC_Os07g04970	535.195	0	Inf	1.2e-09	9.42e-08	transferase family protein, putative, expressed
LOC_Os07g05510	93.553	33.8837	1.4652	0.005469	0.049379	expressed protein
LOC_Os07g05620	4703.84	613.663	2.9383	2.21e-10	2.06e-08	CAMK_KIN1/SNF1/Nim1_like.28 - CAMK includes calcium/calmodulin depedent protein kinases, expressed
LOC_Os07g05740	435.145	41.2343	3.3996	1.2e-10	1.19e-08	receptor-like protein kinase 2 precursor, putative, expressed
LOC_Os07g05830	30.0316	1.91211	3.9732	0.00034023	0.005488	zinc-finger protein, putative, expressed
LOC_Os07g06460	130.952	33.1016	1.9841	0.000197	0.0034809	expressed protein
LOC_Os07g07290	4518.94	853.077	2.4052	1.38e-07	6.8e-06	expressed protein
LOC_Os07g07300	7919.03	1528.35	2.3733	1.74e-07	8.27e-06	expressed protein
LOC_Os07g07440	32.698	4.00531	3.0292	0.0001701	0.0030901	versicolorin reductase, putative, expressed
LOC_Os07g07930	4454.43	102.736	5.4382	1.87e-05	0.00047191	LTPL78 - Protease inhibitor/seed storage/LTP family protein precursor, expressed
LOC_Os07g07974	1297.34	540.472	1.2633	0.0041935	0.040284	tesmin/TSO1-like CXC domain containing protein, expressed
LOC_Os07g08420	107.076	10.9978	3.2834	0.00039947	0.0062627	bZIP transcription factor domain containing protein, expressed
LOC_Os07g08430	4920.99	812.249	2.599	0.001858	0.021321	indole-3-glycerol phosphate lyase, chloroplast precursor, putative, expressed
LOC_Os07g08840	23085.8	9253.61	1.3189	0.0028919	0.030024	thioredoxin, putative, expressed
LOC_Os07g08930	93.5676	5.18273	4.1742	5.12e-08	2.76e-06	expressed protein
LOC_Os07g09190	7629.16	1211.28	2.655	0.00077107	0.010552	transketolase, putative, expressed
LOC_Os07g09470	76.8388	5.22084	3.8795	0.0026533	0.028169	ATPase, putative, expressed
LOC_Os07g09630	176.553	64.3233	1.4567	0.0032531	0.033006	oxidoreductase, putative, expressed
LOC_Os07g09670	2341.36	260.599	3.1674	0.00013109	0.0024924	galactosyltransferase family protein, putative, expressed
LOC_Os07g09675	1034.58	421.516	1.2954	0.0037711	0.037114	expressed protein
LOC_Os07g09680	2381.17	844.367	1.4957	0.00081258	0.01104	ras-related protein, putative, expressed
LOC_Os07g09760	468.363	22.6472	4.3702	3.2e-16	1.04e-13	retrotransposon protein, putative, unclassified, expressed
LOC_Os07g10750	20.5015	2.96592	2.7892	0.0023762	0.025948	transposon protein, putative, Pong sub-class, expressed
LOC_Os07g11739	18081.4	3241.01	2.48	5.15e-05	0.0011183	cytochrome P450, putative, expressed
LOC_Os07g11870	517.87	0	Inf	4.32e-06	0.00013505	cytochrome P450, putative, expressed
LOC_Os07g12240	6448	7.56543	9.7352	7.33e-11	7.68e-09	EF hand family protein, putative, expressed
LOC_Os07g12720	495.567	52.6197	3.2354	0.00072126	0.010024	expressed protein
LOC_Os07g12890	26023.9	7450.75	1.8044	5.36e-05	0.0011577	metal cation transporter, putative, expressed
LOC_Os07g14150	669.102	55.4061	3.5941	3.73e-06	0.00011868	cytidine deaminase, putative, expressed
LOC_Os07g14240	10.2525	0	Inf	0.0047167	0.044235	retrotransposon protein, putative, Ty3-gypsy subclass
LOC_Os07g14650	1073.06	309.359	1.7944	8.61e-05	0.0017344	expressed protein
LOC_Os07g14700	741.643	114.229	2.6988	2.63e-05	0.00063122	harpin-induced protein 1 domain containing protein, expressed
LOC_Os07g14740	3242.25	337.407	3.2644	1.36e-09	1.05e-07	harpin-induced protein 1 domain containing protein, expressed
LOC_Os07g14820	44.5883	0.355505	6.9707	3.39e-08	1.92e-06	expressed protein
LOC_Os07g15930	163.356	22.368	2.8685	8.42e-08	4.36e-06	legume lectins beta domain containing protein, expressed
LOC_Os07g16970	933.268	234.813	1.9908	1.15e-05	0.00031133	rab GDP dissociation inhibitor alpha, putative, expressed
LOC_Os07g17330	2724.89	182.524	3.9	2.52e-07	1.13e-05	B12D protein, putative, expressed
LOC_Os07g22400	102.16	16.6384	2.6182	3.33e-06	0.00010778	POLA3 - Putative DNA polymerase alpha complex subunit, expressed
LOC_Os07g22510	148.387	0	Inf	2.93e-06	9.68e-05	expressed protein
LOC_Os07g22710	3596.06	1194.86	1.5896	0.00038419	0.0060631	CAMK_CAMK_like.32 - CAMK includes calcium/calmodulin depedent protein kinases, expressed
LOC_Os07g23340	802.128	213.261	1.9112	0.0016372	0.019292	male sterility protein, putative, expressed
LOC_Os07g23380	36.2614	9.49959	1.9325	0.0036623	0.036324	acyl CoA reductase, putative, expressed
LOC_Os07g23390	14.4341	0	Inf	0.0036434	0.036156	expressed protein
LOC_Os07g23410	1308.67	0.320802	11.994	3.03e-06	9.91e-05	fatty acid desaturase, putative, expressed
LOC_Os07g23430	706.718	3.03533	7.8631	0.00048401	0.007292	fatty acid desaturase, putative, expressed
LOC_Os07g23570	58.9914	2.85841	4.3672	0.00046565	0.0070858	cytochrome P450 72A1, putative, expressed
LOC_Os07g24830	55.3491	0	Inf	2.56e-05	0.00061601	thionin-like peptide, putative, expressed
LOC_Os07g25490	98.9664	20.3967	2.2786	0.0013328	0.016371	expressed protein
LOC_Os07g25880	38.3975	0	Inf	8.06e-06	0.00023159	hypothetical protein
LOC_Os07g25900	20.4365	0.308101	6.0516	0.0010263	0.013211	expressed protein
LOC_Os07g25940	21.3505	0	Inf	5.36e-07	2.21e-05	hypothetical protein
LOC_Os07g26110	1583.23	4.45312	8.4738	1.22e-06	4.53e-05	membrane associated DUF588 domain containing protein, putative, expressed
LOC_Os07g26490	3022.63	1160.31	1.3813	0.0017439	0.020312	ankyrin repeat domain containing protein, expressed
LOC_Os07g26520	1016.57	364.596	1.4793	0.0012623	0.015618	expressed protein
LOC_Os07g26550	167.525	14.4199	3.5382	5.44e-05	0.0011698	expressed protein
LOC_Os07g26870	173.659	1.86131	6.5438	5.76e-10	4.96e-08	cytochrome P450, putative, expressed
LOC_Os07g27834	25.7614	5.01852	2.3599	0.0037831	0.037201	retrotransposon protein, putative, Ty3-gypsy subclass, expressed
LOC_Os07g28570	37.967	1.01911	5.2194	6.87e-06	0.00020058	leucine rich repeat protein, putative, expressed
LOC_Os07g28640	87.7504	5.52554	3.9892	5.71e-06	0.00017119	expressed protein
LOC_Os07g28850	16199.8	1729.98	3.2271	2.65e-08	1.54e-06	retrotransposon protein, putative, unclassified, expressed
LOC_Os07g28930	345.969	136.609	1.3406	0.003748	0.036937	expressed protein
LOC_Os07g29290	298.686	119.905	1.3167	0.0044049	0.041921	expansin precursor, putative, expressed
LOC_Os07g29390	2385.97	998.758	1.2564	0.0050687	0.046648	peptidyl-prolyl cis-trans isomerase, putative, expressed
LOC_Os07g29960	9598.49	235.753	5.3475	1.61e-16	5.45e-14	cytochrome P450, putative, expressed
LOC_Os07g31010	35.1978	3.81574	3.2054	2.66e-05	0.00063536	expressed protein
LOC_Os07g31020	38.1905	0.308101	6.9537	1.02e-09	8.21e-08	hypothetical protein
LOC_Os07g31030	24.5725	0.924303	4.7325	8.38e-06	0.00023878	hypothetical protein
LOC_Os07g31050	8.24622	0	Inf	0.0023404	0.025647	retrotransposon protein, putative, unclassified
LOC_Os07g31070	5473.33	29.3536	7.5427	3.17e-31	2.84e-27	expressed protein
LOC_Os07g31190	882.09	21.6823	5.3463	1.21e-15	3.35e-13	OsWAK71 - OsWAK receptor-like cytoplasmic kinase OsWAK-RLCK, expressed
LOC_Os07g31884	21168.1	4530.06	2.2243	8.34e-07	3.27e-05	MATE efflux family protein, putative, expressed
LOC_Os07g32010	1667.28	564.798	1.5617	0.00044367	0.0068298	UDP-glucoronosyl and UDP-glucosyl transferase domain containing protein, expressed
LOC_Os07g33440	930.573	119.946	2.9557	0.0017148	0.020038	cytochrome P450, putative, expressed
LOC_Os07g33690	1995.05	379.267	2.3951	2.36e-07	1.07e-05	NBS-LRR type disease resistance protein Hom-F, putative, expressed
LOC_Os07g33700	1460.18	90.5692	4.011	1.82e-12	2.61e-10	transposon protein, putative, unclassified, expressed
LOC_Os07g33710	232.585	22.7396	3.3545	2.25e-05	0.0005511	expressed protein
LOC_Os07g33750	55.5467	8.65735	2.6817	3.95e-05	0.00089263	expressed protein
LOC_Os07g33780	30154.1	3397.95	3.1496	0.00018946	0.0033777	pleiotropic drug resistance protein 5, putative, expressed
LOC_Os07g34040	11.6607	0.616202	4.2421	0.0024136	0.026263	harpin-induced protein 1 domain containing protein, expressed
LOC_Os07g34050	258.42	43.2123	2.5802	3.31e-07	1.44e-05	harpin-induced protein 1 domain containing protein, expressed
LOC_Os07g34250	82.8047	23.2559	1.8321	0.0007689	0.010526	peptidase aspartic family protein, putative, expressed
LOC_Os07g34410	213.622	0.320802	9.3792	1.82e-07	8.54e-06	retrotransposon protein, putative, unclassified, expressed
LOC_Os07g34850	2687.77	267.473	3.3289	0.00058852	0.00851	aspartic proteinase nepenthesin, putative, expressed
LOC_Os07g34940	892.743	135.23	2.7228	1.85e-07	8.69e-06	aspartic proteinase nepenthesin-1 precursor, putative, expressed
LOC_Os07g34980	2211.56	622.272	1.8294	0.0023374	0.025621	TKL_IRAK_DUF26-lh.9 - DUF26 kinases have homology to DUF26 containing loci, expressed
LOC_Os07g35280	331.15	37.7028	3.1347	3.73e-06	0.00011868	TKL_IRAK_DUF26-lc.1 - DUF26 kinases have homology to DUF26 containing loci, expressed
LOC_Os07g35290	1257.85	89.5725	3.8118	1.42e-06	5.14e-05	TKL_IRAK_DUF26-lc.10 - DUF26 kinases have homology to DUF26 containing loci, expressed
LOC_Os07g35310	118.622	37.7808	1.6507	0.0013341	0.016376	TKL_IRAK_DUF26-lc.12 - DUF26 kinases have homology to DUF26 containing loci, expressed
LOC_Os07g35335	191.252	27.9257	2.7758	1.31e-07	6.5e-06	expressed protein
LOC_Os07g35340	2203.79	182.442	3.5945	1.65e-13	2.86e-11	TKL_IRAK_DUF26-lc.14 - DUF26 kinases have homology to DUF26 containing loci, expressed
LOC_Os07g35350	21.3084	0	Inf	5.72e-07	2.35e-05	glucan endo-1,3-beta-glucosidase precursor, putative, expressed
LOC_Os07g35370	977.629	162.868	2.5856	0.00030551	0.0050127	TKL_IRAK_DUF26-lc.15 - DUF26 kinases have homology to DUF26 containing loci, expressed
LOC_Os07g35380	367.838	12.8752	4.8364	1.85e-11	2.18e-09	TKL_IRAK_DUF26-lc.16 - DUF26 kinases have homology to DUF26 containing loci, expressed
LOC_Os07g35620	96.8159	32.8697	1.5585	0.0038633	0.037823	expressed protein
LOC_Os07g35630	835.017	87.7475	3.2504	9.75e-07	3.76e-05	retrotransposon protein, putative, Ty3-gypsy subclass, expressed
LOC_Os07g35640	1866.85	222.878	3.0663	9.65e-11	9.77e-09	expressed protein
LOC_Os07g35660	571.541	22.6557	4.6569	2.81e-08	1.63e-06	TKL_IRAK_DUF26-lc.21 - DUF26 kinases have homology to DUF26 containing loci, expressed
LOC_Os07g35700	2366.74	610.867	1.954	0.0002291	0.0039695	TKL_IRAK_DUF26-lc.4 - DUF26 kinases have homology to DUF26 containing loci, expressed
LOC_Os07g35740	7.75212	0	Inf	0.0031469	0.032157	TKL_IRAK_DUF26-ld.2 - DUF26 kinases have homology to DUF26 containing loci, expressed
LOC_Os07g35790	88.6063	24.1557	1.875	0.0028213	0.029484	TKL_IRAK_DUF26-ld.5 - DUF26 kinases have homology to DUF26 containing loci, expressed
LOC_Os07g35810	167.877	29.1471	2.526	1.29e-05	0.00034324	TKL_IRAK_DUF26-ld.6 - DUF26 kinases have homology to DUF26 containing loci, expressed
LOC_Os07g36570	3362.65	64.0677	5.7139	4.34e-07	1.83e-05	KI domain interacting kinase 1, putative, expressed
LOC_Os07g37480	59.3364	14.7771	2.0056	0.00098039	0.012762	expressed protein
LOC_Os07g37920	73.6863	18.8383	1.9677	0.0005667	0.0082461	no apical meristem protein, putative, expressed
LOC_Os07g38240	933.251	317.466	1.5557	0.00064497	0.0091705	ZOS7-05 - C2H2 zinc finger protein, expressed
LOC_Os07g38250	902.518	126.305	2.837	4.81e-09	3.39e-07	expressed protein
LOC_Os07g38260	1750.88	461.381	1.924	2.28e-05	0.00055801	insulin-degrading enzyme, putative, expressed
LOC_Os07g38570	349.679	36.0776	3.2769	2.58e-10	2.36e-08	expressed protein
LOC_Os07g39210	20.5796	0.616202	5.0617	0.00062952	0.009008	expressed protein
LOC_Os07g39270	11256	2488.41	2.1774	0.0036676	0.036345	polyprenyl synthetase, putative, expressed
LOC_Os07g39280	2370.87	1002.39	1.242	0.0046437	0.043658	transporter-related, putative, expressed
LOC_Os07g39350	15987.3	6183.46	1.3704	0.0019452	0.02206	transporter family protein, putative, expressed
LOC_Os07g39360	70.03	9.50467	2.8813	0.0025245	0.027164	transporter family protein, putative, expressed
LOC_Os07g39460	213.122	0.308101	9.4341	1.58e-06	5.6e-05	transposon protein, putative, unclassified, expressed
LOC_Os07g39520	2839.99	239.794	3.566	1.5e-12	2.18e-10	STE_PAK_Ste20_Slob_Wnk.5 - STE kinases include homologs to sterile 7, sterile 11 and sterile 20 from yeast, expressed
LOC_Os07g39680	7018.39	2017.5	1.7986	6.42e-05	0.0013471	UV-induced protein uvi15, putative, expressed
LOC_Os07g39720	2056.68	76.2681	4.7531	1.13e-11	1.38e-09	expressed protein
LOC_Os07g40000	4134.14	1419.25	1.5425	0.00148	0.017824	DUF260 domain containing protein, putative, expressed
LOC_Os07g40290	689.291	67.5709	3.3506	5.2e-08	2.79e-06	OsGH3.8 - Probable indole-3-acetic acid-amido synthetase, expressed
LOC_Os07g40470	60.7868	19.3216	1.6535	0.00506	0.046592	expressed protein
LOC_Os07g40630	5678.88	345.162	4.0403	2.28e-10	2.11e-08	BRASSINOSTEROID INSENSITIVE 1 precursor, putative, expressed
LOC_Os07g41230	864.394	111.076	2.9601	6.58e-10	5.58e-08	esterase, putative, expressed
LOC_Os07g41460	1405.99	117.448	3.5815	1.25e-05	0.00033432	sulfotransferase domain containing protein, expressed
LOC_Os07g41600	32.5444	2.63242	3.6279	0.0012981	0.015989	proline-rich protein, putative, expressed
LOC_Os07g41960	452.513	4.99312	6.5019	1.74e-25	4.14e-22	expressed protein
LOC_Os07g42160	1235.35	264.489	2.2236	0.00072103	0.010024	HD domain containing protein, putative, expressed
LOC_Os07g42260	301.29	111.371	1.4358	0.0019344	0.021965	peptidase, T1 family, putative, expressed
LOC_Os07g42370	23816.5	4472.91	2.4127	0.00059375	0.0085715	zinc-finger protein, putative, expressed
LOC_Os07g42510	591.95	172.617	1.7779	0.00012947	0.0024693	AP2 domain containing protein, expressed
LOC_Os07g42740	2273.09	244.15	3.2188	7.47e-05	0.0015361	DUF1645 domain containing protein, putative, expressed
LOC_Os07g42910	279.606	11.9991	4.5424	1.38e-15	3.77e-13	cytochrome c oxidase subunit, putative, expressed
LOC_Os07g43010	1850.12	543.454	1.7674	8.79e-05	0.0017678	expressed protein
LOC_Os07g43160	75.4482	1.2451	5.9211	0.00016813	0.0030662	uncharacterized glycosyl hydrolase Rv2006/MT2062, putative, expressed
LOC_Os07g43170	1312.69	534.712	1.2957	0.0042543	0.040726	adenylate kinase, putative, expressed
LOC_Os07g43240	34.6659	0.320802	6.7557	5.85e-09	4.02e-07	SKP1-like protein 1B, putative, expressed
LOC_Os07g43604	11.3777	0.616202	4.2067	0.0028894	0.030006	expressed protein
LOC_Os07g43800	2384.71	293.222	3.0238	0.0012053	0.015043	EF hand family protein, putative, expressed
LOC_Os07g44100	102.704	29.1073	1.819	0.0005806	0.0084158	expressed protein
LOC_Os07g44110	77.29	0.355505	7.7643	4.01e-07	1.71e-05	cytochrome P450 72A1, putative, expressed
LOC_Os07g44130	2683.18	615.073	2.1251	2.46e-06	8.27e-05	cytochrome P450 72A1, putative, expressed
LOC_Os07g44140	209.763	3.32143	5.9808	4.08e-15	9.67e-13	cytochrome P450 72A1, putative, expressed
LOC_Os07g44290	289.832	100.79	1.5239	0.0014341	0.017353	CAMK_KIN1/SNF1/Nim1_like.29 - CAMK includes calcium/calmodulin depedent protein kinases, expressed
LOC_Os07g44410	2580.72	166.506	3.9541	5.75e-05	0.001227	WD40-like Beta Propeller Repeat family protein, expressed
LOC_Os07g44440	14.1377	0	Inf	0.0026519	0.028162	peroxiredoxin, putative, expressed
LOC_Os07g44910	54.6586	5.28684	3.37	0.0033238	0.033553	gibberellin receptor GID1L2, putative, expressed
LOC_Os07g44950	1779.5	583.499	1.6087	0.00041192	0.0064185	bZIP transcription factor domain containing protein, expressed
LOC_Os07g44960	46.0372	6.47274	2.8304	0.0052667	0.048013	nodulation protein-related, putative, expressed
LOC_Os07g45550	461.588	9.13306	5.6594	1.31e-05	0.00034739	expressed protein
LOC_Os07g45560	24.8449	2.55961	3.279	0.003862	0.037822	expressed protein
LOC_Os07g46030	32.812	4.62664	2.8262	0.00024295	0.0041552	expressed protein
LOC_Os07g46039	118.795	19.8744	2.5795	2.78e-06	9.27e-05	expressed protein
LOC_Os07g46060	1500.27	329.205	2.1882	2.1e-06	7.2e-05	expressed protein
LOC_Os07g46320	29.6197	3.12841	3.2431	0.00011477	0.0022368	uncharacterized UPF0114 domain containing protein, expressed
LOC_Os07g46380	2234.55	715	1.644	0.00024744	0.0042057	glycosyltransferase, putative, expressed
LOC_Os07g46430	1158.22	360.771	1.6828	0.00027823	0.0046323	expressed protein
LOC_Os07g46570	1150.26	369.3	1.6391	0.0012922	0.015922	glutaredoxin, putative, expressed
LOC_Os07g46670	4099.41	1118.47	1.8739	2.58e-05	0.00061965	early response to dehydration 15, putative, expressed
LOC_Os07g46800	236.906	90.4587	1.389	0.004206	0.040361	expressed protein
LOC_Os07g46830	269.191	8.75556	4.9423	0.0026151	0.027911	sex determination protein tasselseed-2, putative, expressed
LOC_Os07g46860	1762.09	16.5055	6.7382	0.00024654	0.0041964	sex determination protein tasselseed-2, putative, expressed
LOC_Os07g46870	4826.61	138.19	5.1263	3.14e-05	0.00073713	sex determination protein tasselseed-2, putative, expressed
LOC_Os07g47230	419.072	0	Inf	3.69e-10	3.3e-08	TKL_IRAK_DUF26-lh.10 - DUF26 kinases have homology to DUF26 containing loci, expressed
LOC_Os07g47660	111.217	2.22951	5.6405	6.03e-15	1.39e-12	expressed protein
LOC_Os07g48229	1746.13	246.944	2.8219	1.09e-05	0.00029753	vacuolar-sorting receptor precursor, putative, expressed
LOC_Os07g48430	1919.53	708.149	1.4386	0.0014146	0.017181	nucleoside-triphosphatase, putative, expressed
LOC_Os07g48450	1002.11	31.7712	4.9792	4.61e-07	1.93e-05	no apical meristem protein, putative, expressed
LOC_Os07g48610	5084.36	814.226	2.6426	6.95e-08	3.67e-06	hydrolase, alpha/beta fold family domain containing protein, expressed
LOC_Os07g48620	18.8669	0.616202	4.9363	4.89e-05	0.0010664	expressed protein
LOC_Os07g48730	1523.34	149.625	3.3478	4.41e-12	5.9e-10	tyrosine protein kinase domain containing protein, putative, expressed
LOC_Os07g48750	214.542	43.6635	2.2968	0.0010518	0.013479	alpha-N-arabinofuranosidase, putative, expressed
LOC_Os07g48760	1328.55	20.9814	5.9846	8.41e-10	6.93e-08	CAMK_KIN1/SNF1/Nim1_like.32 - CAMK includes calcium/calmodulin depedent protein kinases, expressed
LOC_Os07g48770	142.902	49.8246	1.5201	0.0027349	0.028753	serine hydrolase domain containing protein, expressed
LOC_Os07g48780	7920.47	2633.68	1.5885	0.0003185	0.0051962	OsCam1-2 - Calmodulin, expressed
LOC_Os07g48790	420.535	4.88143	6.4288	4.97e-09	3.49e-07	SNF1-related protein kinase regulatory subunit beta-1, putative, expressed
LOC_Os07g48800	1035.24	26.298	5.2989	8.18e-23	8.6e-20	VQ domain containing protein, putative, expressed
LOC_Os07g48830	583.629	239.403	1.2856	0.0033996	0.034144	glycosyl transferase 8 domain containing protein, putative, expressed
LOC_Os07g49080	898.185	268.782	1.7406	0.00015279	0.0028401	COBRA-like protein 7 precursor, putative, expressed
LOC_Os07g49480	1509.22	264.718	2.5113	8.79e-08	4.54e-06	KIP1, putative, expressed
LOC_Os08g01150	38302.3	5393.27	2.8282	8.05e-10	6.71e-08	DTA2, putative, expressed
LOC_Os08g01240	2115.86	702.442	1.5908	0.00028476	0.0047233	expressed protein
LOC_Os08g01410	2070.44	657.221	1.6555	0.00027454	0.0045882	phosphate/phosphoenolpyruvate translocator-related protein, putative, expressed
LOC_Os08g01590	2329.7	915.214	1.348	0.0028287	0.02953	expressed protein
LOC_Os08g01830	1267.83	41.643	4.9281	1.18e-09	9.3e-08	TKL_IRAK_CR4L.6 - The CR4L subfamily has homology with Crinkly4, expressed
LOC_Os08g01950	2338.69	44.6816	5.7099	3.39e-23	3.91e-20	transferase family protein, putative, expressed
LOC_Os08g01970	23.3396	0	Inf	0.00085072	0.011444	retrotransposon protein, putative, unclassified, expressed
LOC_Os08g02030	445.01	4.48443	6.6328	8.8e-06	0.00024986	transferase family protein, putative, expressed
LOC_Os08g02110	1009.57	44.2493	4.5119	0.0049294	0.045731	peroxidase precursor, putative, expressed
LOC_Os08g02230	17596.6	9.54105	10.849	1.72e-08	1.06e-06	FAD-binding and arabino-lactone oxidase domains containing protein, putative, expressed
LOC_Os08g02420	2594.74	1086.06	1.2565	0.0046786	0.043952	OsCML7 - Calmodulin-related calcium sensor protein, expressed
LOC_Os08g02450	32.2273	6.17984	2.3826	0.0013637	0.016665	ATCHX, putative, expressed
LOC_Os08g03240	417.329	12.2903	5.0856	4.86e-06	0.00014921	lectin-like receptor kinase 1, putative, expressed
LOC_Os08g03300	33.1649	6.65556	2.317	0.0012598	0.015611	OsFBDUF40 - F-box and DUF domain containing protein, expressed
LOC_Os08g03330	643.872	0.628903	9.9997	0.00011108	0.0021733	expressed protein
LOC_Os08g03350	79512.8	6473.03	3.6187	4.47e-14	8.78e-12	amino acid transporter, putative, expressed
LOC_Os08g04130	3389.41	269.145	3.6546	1.43e-12	2.12e-10	copine-6, putative, expressed
LOC_Os08g04180	9834.77	3757.93	1.388	0.001841	0.021173	tryptophan synthase beta chain 1, putative, expressed
LOC_Os08g04350	9.38676	0	Inf	0.0044302	0.042116	plastocyanin-like domain containing protein, putative, expressed
LOC_Os08g04420	313.343	34.2884	3.192	0.00021296	0.0037206	tyrosine protein kinase domain containing protein, putative, expressed
LOC_Os08g04540	927.527	0	Inf	1.05e-05	0.00028915	decarboxylase, putative, expressed
LOC_Os08g04560	1588.51	133.9	3.5684	0.0028379	0.029596	decarboxylase, putative, expressed
LOC_Os08g04620	8542.07	2837.17	1.5901	0.00037427	0.005938	MSP domain containing protein, putative, expressed
LOC_Os08g05480	7176.36	1193.7	2.5878	1.66e-08	1.03e-06	OsFBX261 - F-box domain containing protein, expressed
LOC_Os08g05960	74.8845	0.984407	6.2493	3.63e-12	4.93e-10	expressed protein
LOC_Os08g05970	53.5929	0.355505	7.236	1.52e-07	7.34e-06	expressed protein
LOC_Os08g05980	35.182	1.29251	4.7666	0.0013127	0.016147	expressed protein
LOC_Os08g06010	990.039	277.073	1.8372	0.00028819	0.0047735	transporter, major facilitator family, putative, expressed
LOC_Os08g06100	20936.7	4962.13	2.077	5.54e-06	0.0001667	O-methyltransferase, putative, expressed
LOC_Os08g06200	1111.9	461.29	1.2693	0.0050334	0.046479	stomatin-like protein 2, putative, expressed
LOC_Os08g07020	55.9941	5.33252	3.3924	1.17e-06	4.39e-05	expressed protein
LOC_Os08g07240	30.8397	0.628903	5.6158	0.00077496	0.010589	expressed protein
LOC_Os08g07340	90.201	28.7179	1.6512	0.002447	0.026562	mla1, putative, expressed
LOC_Os08g07720	999.03	255.113	1.9694	0.0020934	0.023435	transferase family protein, putative, expressed
LOC_Os08g07730	1084.46	136.74	2.9875	7.71e-10	6.44e-08	transferase family protein, putative, expressed
LOC_Os08g07890	3789.33	347.58	3.4465	0.00085968	0.011535	NB-ARC domain containing protein, expressed
LOC_Os08g08680	1436.34	269.577	2.4136	9.07e-05	0.0018131	transposon protein, putative, CACTA, En/Spm sub-class, expressed
LOC_Os08g08840	1630.15	496.561	1.715	0.00012442	0.0023884	phosphate/phosphate translocator, putative, expressed
LOC_Os08g09640	102.714	7.25393	3.8237	1.12e-09	8.85e-08	OsFBL43 - F-box domain and LRR containing protein, expressed
LOC_Os08g09740	125.133	41.1733	1.6037	0.001753	0.020371	OsFBX274 - F-box domain containing protein, expressed
LOC_Os08g10010	475.065	37.7212	3.6547	9.21e-06	0.00025971	acyl-desaturase, chloroplast precursor, putative, expressed
LOC_Os08g10100	49.0124	13.94	1.8139	0.0031411	0.032135	expressed protein
LOC_Os08g10260	1093.82	331.665	1.7216	0.00017582	0.0031757	NBS-LRR disease resistance protein, putative, expressed
LOC_Os08g10270	23.2414	4.40232	2.4004	0.0052621	0.047995	expressed protein
LOC_Os08g10290	636.212	103.246	2.6234	5.2e-05	0.0011266	SHR5-receptor-like kinase, putative, expressed
LOC_Os08g10500	270.632	81.8268	1.7257	0.0003026	0.0049754	expressed protein
LOC_Os08g12630	20.3861	0.676307	4.9138	0.0019015	0.021709	expressed protein
LOC_Os08g12640	38.4026	0.628903	5.9322	0.0002385	0.0040967	retrotransposon protein, putative, Ty3-gypsy subclass, expressed
LOC_Os08g13270	861.396	17.3638	5.6325	3.41e-24	4.51e-21	expressed protein
LOC_Os08g13420	732.235	302.596	1.2749	0.0044753	0.042477	S-domain receptor-like protein kinase, putative, expressed
LOC_Os08g13440	236.766	8.9181	4.7306	0.0023289	0.025559	cupin domain containing protein, expressed
LOC_Os08g13870	1396.54	170.104	3.0374	3.57e-10	3.2e-08	S-locus lectin protein kinase family protein, putative, expressed
LOC_Os08g14570	7801.82	1944.55	2.0044	7.62e-05	0.0015621	NADPH reductase, putative, expressed
LOC_Os08g14720	288.957	10.3748	4.7997	9.01e-05	0.0018041	expressed protein
LOC_Os08g15190	159.25	25.8806	2.6213	8.14e-07	3.21e-05	expressed protein
LOC_Os08g15650	2198.41	502.42	2.1295	0.00016979	0.0030885	expressed protein
LOC_Os08g15700	14.2751	0	Inf	0.00020739	0.0036392	retrotransposon protein, putative, unclassified, expressed
LOC_Os08g15710	22641	31.8106	9.4752	6.11e-17	2.19e-14	DC1 domain, putative, expressed
LOC_Os08g15720	27.2224	0	Inf	0.0030374	0.031271	retrotransposon protein, putative, LINE subclass, expressed
LOC_Os08g19210	1063.61	352.244	1.5943	0.00039601	0.0062166	expressed protein
LOC_Os08g19550	299.516	110.878	1.4337	0.002503	0.026981	expressed protein
LOC_Os08g19694	102.904	7.42495	3.7928	7.95e-05	0.001617	NB-ARC domain containing protein, expressed
LOC_Os08g23150	1588.57	338.427	2.2308	0.0024169	0.026283	indole-3-glycerol phosphate synthase, chloroplast precursor, putative, expressed
LOC_Os08g23210	166.123	62.5381	1.4094	0.0050418	0.04652	retrotransposon protein, putative, unclassified, expressed
LOC_Os08g24190	334.615	92.7822	1.8506	0.00011559	0.002248	OsFBX286 - F-box domain containing protein, expressed
LOC_Os08g24300	1815.63	4.38794	8.6927	4.3e-07	1.82e-05	expressed protein
LOC_Os08g24310	712.13	36.0734	4.3031	1.03e-11	1.26e-09	receptor-like protein kinase precursor, putative, expressed
LOC_Os08g24434	78.496	5.87174	3.7408	9.48e-09	6.27e-07	expressed protein
LOC_Os08g24630	51.9274	1.74282	4.897	2e-05	0.00049892	protein kinase domain containing protein, expressed
LOC_Os08g24640	8.68001	0	Inf	0.0035241	0.035168	retrotransposon protein, putative, Ty3-gypsy subclass, expressed
LOC_Os08g24650	14.8027	0.320802	5.528	0.0002772	0.0046216	retrotransposon protein, putative, Ty3-gypsy subclass, expressed
LOC_Os08g24670	48.873	0.997108	5.6151	0.0005286	0.0078078	legume lectins beta domain containing protein, putative, expressed
LOC_Os08g24750	936.125	0.628903	10.54	2.44e-08	1.44e-06	xyloglucan fucosyltransferase, putative, expressed
LOC_Os08g25030	225.406	62.9436	1.8404	0.00019025	0.0033883	plant protein of unknown function domain containing protein, expressed
LOC_Os08g25430	9413.39	1642.89	2.5185	6.73e-06	0.00019744	cysteine-rich receptor-like protein kinase 35 precursor, putative, expressed
LOC_Os08g25839	2469.88	4.74172	9.0248	2.85e-05	0.00067564	expressed protein
LOC_Os08g25850	2699.19	3.08101	9.7749	1.2e-11	1.47e-09	expressed protein
LOC_Os08g25860	1921.26	4.95502	8.5989	2.78e-10	2.52e-08	expressed protein
LOC_Os08g25990	559.183	0.308101	10.826	4.43e-11	4.89e-09	alcohol oxidase-related, putative, expressed
LOC_Os08g26010	633.784	0	Inf	8.81e-13	1.37e-10	transposon protein, putative, CACTA, En/Spm sub-class, expressed
LOC_Os08g26020	73.8069	0	Inf	1.25e-12	1.89e-10	transposon protein, putative, CACTA, En/Spm sub-class, expressed
LOC_Os08g26050	121.857	0	Inf	7.6e-06	0.00021987	hypothetical protein
LOC_Os08g26120	381.175	0	Inf	1.98e-11	2.31e-09	expressed protein
LOC_Os08g26320	473.736	0	Inf	6.13e-05	0.0012976	hypothetical protein
LOC_Os08g26350	3253.37	1.58791	11.001	1.02e-20	6.65e-18	expressed protein
LOC_Os08g26360	154.54	0.308101	8.9704	7.07e-05	0.0014642	expressed protein
LOC_Os08g26370	25.7987	0	Inf	3.62e-06	0.00011586	hypothetical protein
LOC_Os08g26520	2527.09	0.320802	12.944	1.35e-22	1.38e-19	expressed protein
LOC_Os08g26580	181.987	0	Inf	4.06e-05	0.00091315	hypothetical protein
LOC_Os08g26620	581.295	0	Inf	7.66e-17	2.71e-14	hypothetical protein
LOC_Os08g27170	2082.12	91.8635	4.5024	6.71e-19	3.24e-16	calmodulin binding protein, putative, expressed
LOC_Os08g27690	48.2114	0	Inf	1.05e-05	0.00028722	expressed protein
LOC_Os08g27790	54.7858	9.06784	2.595	0.0038188	0.037473	retrotransposon protein, putative, unclassified, expressed
LOC_Os08g27800	114.121	18.8594	2.5972	0.00034802	0.0055887	retrotransposon protein, putative, unclassified, expressed
LOC_Os08g27870	1470.83	0	Inf	7.77e-08	4.06e-06	EARLY flowering protein, putative, expressed
LOC_Os08g28240	25.3295	3.98503	2.6682	0.0012649	0.015645	carotenoid cleavage dioxygenase, putative, expressed
LOC_Os08g28570	345.965	0.308101	10.133	1.54e-08	9.66e-07	resistance protein, putative, expressed
LOC_Os08g28710	328.4	8.07585	5.3457	0.00018124	0.0032567	receptor protein kinase CRINKLY4 precursor, putative, expressed
LOC_Os08g28860	434.213	172.29	1.3336	0.0038872	0.037974	hydrolase, NUDIX family, domain containing protein, expressed
LOC_Os08g29520	547.405	205.413	1.4141	0.0019071	0.021752	cytochrome b561, putative, expressed
LOC_Os08g29560	102.316	36.9461	1.4695	0.0048475	0.045159	retrotransposon protein, putative, unclassified, expressed
LOC_Os08g29570	5733.87	1747.77	1.714	0.00015955	0.0029413	pleiotropic drug resistance protein 3, putative, expressed
LOC_Os08g29660	5276.5	831.516	2.6658	1.19e-08	7.69e-07	WRKY69, expressed
LOC_Os08g30100	6659.36	2.16941	11.584	5.8e-12	7.48e-10	1-aminocyclopropane-1-carboxylate oxidase homolog 1, putative, expressed
[truncated: 738 more rows]

## Sheet: Down
Gene_id	readcount_T138	readcount_Nip	log2FoldChange	pval	padj	Gene Description
LOC_Os01g01340	60086.8	327850	-2.4479	0.0012105	0.015086	light-induced protein 1-like, putative, expressed
LOC_Os01g01350	60.4659	674.197	-3.479	0.00056426	0.008219	SNF7 domain containing protein, putative, expressed
LOC_Os01g01360	204.923	593.213	-1.5335	0.00072826	0.010096	peptide transporter PTR2, putative, expressed
LOC_Os01g01740	51.9587	184.72	-1.8299	0.0018179	0.020962	protein kinase domain containing protein, expressed
LOC_Os01g01890	3.47334	20.5888	-2.5675	0.0037332	0.036842	expressed protein
LOC_Os01g01910	261.727	633.555	-1.2754	0.0051065	0.046923	expressed protein
LOC_Os01g02060	3.72616	20.8402	-2.4836	0.0048193	0.044931	TOO MANY MOUTHS precursor, putative, expressed
LOC_Os01g02370	195.305	720.303	-1.8829	2.4977e-05	0.00060406	receptor-like kinase ARK1AS, putative, expressed
LOC_Os01g02580	132.295	380.451	-1.524	0.0008179	0.011095	protein kinase domain containing protein, expressed
LOC_Os01g02700	517	1648.48	-1.6729	0.00015513	0.0028739	protein kinase domain containing protein, expressed
LOC_Os01g02710	298.374	1616.21	-2.4374	3.3176e-05	0.00077206	LRk-type protein, putative, expressed
LOC_Os01g02760	77.2962	218.928	-1.502	0.0015132	0.01812	receptor-like kinase, putative, expressed
LOC_Os01g03180	19.0612	336.473	-4.1418	0.0008023	0.010938	retrotransposon protein, putative, unclassified, expressed
LOC_Os01g04630	1260.49	4014.75	-1.6713	0.0026747	0.028295	muconate cycloisomerase, putative, expressed
LOC_Os01g04900	1364.35	3445.87	-1.3367	0.0022577	0.024923	peptidase M50 family protein, putative, expressed
LOC_Os01g06150	19.6003	111.79	-2.5118	1.1176e-05	0.00030356	expressed protein
LOC_Os01g07630	30.7353	223.071	-2.8595	7.3596e-06	0.00021388	BRASSINOSTEROID INSENSITIVE 1-associated receptor kinase 1 precursor, putative, expressed
LOC_Os01g07980	0.66986	12.0702	-4.1714	0.0021196	0.023669	ankyrin, putative, expressed
LOC_Os01g08190	2.41994	18.1154	-2.9042	0.0026629	0.028255	transcriptional corepressor LEUNIG, putative, expressed
LOC_Os01g08300	50.5856	300.768	-2.5719	0.0010237	0.013206	expressed protein
LOC_Os01g08510	638.617	1558.45	-1.2871	0.003541	0.035287	MAR-binding filament-like protein 1, putative, expressed
LOC_Os01g09450	37.7944	154.912	-2.0352	5.7721e-05	0.0012311	OsIAA2 - Auxin-responsive Aux/IAA gene family member, expressed
LOC_Os01g09540	3348.41	20204.4	-2.5931	0.00040769	0.0063748	HAD superfamily phosphatase, putative, expressed
LOC_Os01g09930	45.2526	202.131	-2.1592	0.00013564	0.0025654	helix-loop-helix DNA-binding domain containing protein, expressed
LOC_Os01g10320	3.48341	48.4619	-3.7983	3.7898e-05	0.00086229	class III HD-Zip protein 8, putative, expressed
LOC_Os01g10400	74214.6	254583	-1.7784	4.993e-05	0.0010869	expressed protein
LOC_Os01g10640	12.6805	58.6481	-2.2095	0.00038355	0.0060556	expressed protein
LOC_Os01g10810	7.55281	79.9555	-3.4041	1.9085e-05	0.00047842	rho termination factor, N-terminal domain containing protein, expressed
LOC_Os01g11010	3.19369	47.0917	-3.8822	9.6112e-05	0.0019076	peptide-N4-asparagine amidase A, putative, expressed
LOC_Os01g11250	179.73	538.011	-1.5818	0.00051736	0.0076703	potassium channel KAT1, putative, expressed
LOC_Os01g11620	0.983004	14.5325	-3.8859	0.0012174	0.015162	GDSL-like lipase/acylhydrolase, putative, expressed
LOC_Os01g11670	112.976	318.948	-1.4973	0.0014445	0.017444	OsSCP2 - Putative Serine Carboxypeptidase homologue, expressed
LOC_Os01g12900	25.5741	176.539	-2.7872	0.00016594	0.0030294	ras-related protein, putative, expressed
LOC_Os01g13030	206.969	760.749	-1.878	3.817e-05	0.00086738	OsIAA3 - Auxin-responsive Aux/IAA gene family member, expressed
LOC_Os01g14510	274.115	664.522	-1.2775	0.0040485	0.039179	BRASSINOSTEROID INSENSITIVE 1 precursor, putative, expressed
LOC_Os01g14514	203.747	804.779	-1.9818	1.4346e-05	0.00037511	expressed protein
LOC_Os01g14890	638.491	1597.44	-1.323	0.0028182	0.029464	expressed protein
LOC_Os01g15580	108.345	304.058	-1.4887	0.0013855	0.016892	disease resistance protein RGA2, putative, expressed
LOC_Os01g15770	132.71	382.277	-1.5263	0.00075693	0.01039	transmembrane protein 136, putative, expressed
LOC_Os01g16020	104.267	264.901	-1.3452	0.0053858	0.048862	FAD binding domain containing protein, expressed
LOC_Os01g18320	1216.32	3070.76	-1.3361	0.0022714	0.025036	protoporphyrinogen oxidase, chloroplast precursor, putative, expressed
LOC_Os01g20800	7.28471	49.9586	-2.7778	0.0019572	0.022167	expressed protein
LOC_Os01g20830	1539.85	4446.34	-1.5298	0.00063737	0.0090914	heavy metal-associated domain containing protein, expressed
LOC_Os01g20940	141.41	375.114	-1.4074	0.0028007	0.029315	PHS1, putative, expressed
LOC_Os01g22660	3.67252	22.1166	-2.5903	0.0030822	0.031622	GDSL-like lipase/acylhydrolase, putative, expressed
LOC_Os01g25710	99.4565	268.875	-1.4348	0.0044143	0.041988	transposon protein, putative, CACTA, En/Spm sub-class, expressed
LOC_Os01g25820	900.889	8849.43	-3.2962	2.621e-10	2.39e-08	respiratory burst oxidase, putative, expressed
LOC_Os01g26290	1.02658	12.2395	-3.5756	0.0039427	0.03838	expressed protein
LOC_Os01g27120	12.16	43.6475	-1.8438	0.0040274	0.039013	expressed protein
LOC_Os01g27230	98.6169	1606.8	-4.0262	9.3228e-06	0.00026219	12-oxophytodienoate reductase, putative, expressed
LOC_Os01g27760	0.339967	9.04928	-4.7343	0.0054398	0.049227	expressed protein
LOC_Os01g27770	6.06903	54.0773	-3.1555	2.1122e-05	0.00052394	expressed protein
LOC_Os01g28540	851.55	2251.73	-1.4029	0.0016367	0.019292	stress regulated protein, putative, expressed
LOC_Os01g31940	349.102	941.886	-1.4319	0.0014391	0.017403	purine permease, putative, expressed
LOC_Os01g32610	56.8285	153.886	-1.4372	0.0033657	0.033889	expressed protein
LOC_Os01g34060	2524.62	6619.97	-1.3908	0.0019447	0.02206	MYB family transcription factor, putative, expressed
LOC_Os01g35590	19.6051	66.5783	-1.7638	0.0025635	0.027508	expressed protein
LOC_Os01g36970	13.1211	94.4627	-2.8479	0.0031331	0.032071	expressed protein
LOC_Os01g37590	2717.98	10359.7	-1.9304	0.00044584	0.0068544	peptide transporter PTR2, putative, expressed
LOC_Os01g37950	531.816	1296.15	-1.2852	0.0038883	0.037975	expressed protein
LOC_Os01g38610	3.17694	160.693	-5.6605	0.0032363	0.032864	helix-loop-helix DNA-binding domain containing protein, expressed
LOC_Os01g39960	1259.61	3139.28	-1.3175	0.0026761	0.028301	lycopene epsilon cyclase, chloroplast precursor, putative, expressed
LOC_Os01g40820	159.847	456.097	-1.5126	0.0011521	0.014515	peptidase family M41 containing protein, expressed
LOC_Os01g41550	115.639	355.626	-1.6207	0.0011078	0.014052	aspartic proteinase, putative, expressed
LOC_Os01g41720	28.5667	83.832	-1.5532	0.0035375	0.035262	expressed protein
LOC_Os01g42294	19.8905	97.4156	-2.2921	6.7246e-05	0.0014008	inactive receptor kinase At2g26730 precursor, putative, expressed
LOC_Os01g42550	10.986	43.2294	-1.9763	0.0038196	0.037473	expressed protein
LOC_Os01g43160	92.1422	481.796	-2.3865	0.00065026	0.0092346	polygalacturonase, putative, expressed
LOC_Os01g43230	11.0965	126.423	-3.5101	0.0021175	0.023653	expressed protein
LOC_Os01g43844	1195.35	4494.53	-1.9107	5.5034e-05	0.0011801	cytochrome P450 72A1, putative, expressed
LOC_Os01g44069	6.04889	30.3829	-2.3285	0.0021358	0.02382	glycerol-3-phosphate acyltransferase, putative, expressed
LOC_Os01g45140	144.93	397.455	-1.4554	0.0026259	0.02796	anthocyanin 3-O-beta-glucosyltransferase, putative, expressed
LOC_Os01g45380	335.433	851.337	-1.3437	0.0025359	0.02727	protein kinase domain containing protein, expressed
LOC_Os01g46130	26.0649	107.492	-2.044	0.00014441	0.0027082	expressed protein
LOC_Os01g46760	435.336	1695.74	-1.9617	1.378e-05	0.00036336	protein phosphatase 2C, putative, expressed
LOC_Os01g46820	13.0606	104.082	-2.9944	1.0527e-05	0.00028901	expressed protein
LOC_Os01g47570	329.728	849.845	-1.3659	0.0021538	0.023998	expressed protein
LOC_Os01g47900	21.3087	76.6721	-1.8473	0.0030596	0.031463	S-locus-like receptor protein kinase, putative, expressed
LOC_Os01g48850	81.0925	318.321	-1.9728	9.9308e-05	0.0019677	auxin-responsive protein, putative, expressed
LOC_Os01g50070	9.51882	59.0704	-2.6336	3.8308e-05	0.0008694	multidrug resistance protein 1, putative, expressed
LOC_Os01g50080	134.269	839.212	-2.6439	1.7556e-08	1.0745e-06	MDR-like ABC transporter, putative, expressed
LOC_Os01g50730	21.3973	161.557	-2.9165	0.0049292	0.045731	expressed protein
LOC_Os01g51754	451.827	1836.43	-2.0231	0.0022697	0.025025	alpha-amylase precursor, putative, expressed
LOC_Os01g51980	493.33	3990.69	-3.016	4.6525e-11	5.1014e-09	alliin lyase precursor, putative, expressed
LOC_Os01g52540	10.7231	50.9607	-2.2487	0.00038292	0.0060484	B3 DNA binding domain containing protein, expressed
LOC_Os01g54490	12.5081	132.893	-3.4093	0.0011486	0.014493	osFTL9 FT-Like9 homologous to Flowering Locus T gene; contains Pfam profile PF01161: Phosphatidylethanolamine-binding protein
LOC_Os01g54990	261.401	1151.8	-2.1396	2.3344e-06	7.8945e-05	auxin response factor, putative, expressed
LOC_Os01g55570	1489.29	3485.93	-1.2269	0.0047174	0.044235	expressed protein
LOC_Os01g56320	23.9715	94.0156	-1.9716	0.00030296	0.004979	OsSub4 - Putative Subtilisin homologue, expressed
LOC_Os01g56330	37.7561	140.852	-1.8994	0.00017277	0.0031332	TKL_IRAK_CrRLK1L-1.5 - The CrRLK1L-1 subfamily has homology to the CrRLK1L homolog, expressed
LOC_Os01g56370	48.3421	254.694	-2.3974	0.0038488	0.03771	wax synthase, putative, expressed
LOC_Os01g56380	110.25	319.699	-1.5359	0.0007603	0.010429	decarboxylase, putative, expressed
LOC_Os01g57020	74.8237	268.47	-1.8432	0.00010134	0.0020047	expressed protein
LOC_Os01g57280	201.127	547.586	-1.445	0.0016016	0.018969	rp1, putative, expressed
LOC_Os01g57560	1232.12	3045.92	-1.3057	0.0026666	0.028261	serine/threonine-protein kinase receptor precursor, putative, expressed
LOC_Os01g57599	1507.66	4557.62	-1.596	0.0003434	0.0055317	retrotransposon protein, putative, unclassified, expressed
LOC_Os01g57710	166.182	476	-1.5182	0.0050525	0.046571	membrane protein, putative, expressed
LOC_Os01g58640	89.2926	263.895	-1.5634	0.0023766	0.025948	nucleotide pyrophosphatase/phosphodiesterase, putative, expressed
LOC_Os01g59350	166.998	641.71	-1.9421	0.00027945	0.004646	transcription factor, putative, expressed
LOC_Os01g59970	177.425	736.824	-2.0541	1.1543e-05	0.00031139	expressed protein
LOC_Os01g60060	44.7397	153.315	-1.7769	0.00057071	0.0082926	leucine-rich repeat family protein, putative, expressed
LOC_Os01g60730	2427.92	9422.56	-1.9564	1.3317e-05	0.00035235	RING-H2 finger protein, putative, expressed
LOC_Os01g61110	5.84971	34.2715	-2.5506	0.00056173	0.0081948	ulp1 protease family, C-terminal catalytic domain containing protein, expressed
LOC_Os01g61330	32.3982	92.5013	-1.5136	0.004311	0.041214	ankyrin homolog precursor, putative, expressed
LOC_Os01g62200	0	16.8814	#NAME?	0.00066011	0.00933	domain of unknown function DUF966 domain containing protein, expressed
LOC_Os01g63870	119.607	460.397	-1.9446	3.5499e-05	0.00081759	nucleobase-ascorbate transporter, putative, expressed
LOC_Os01g63880	7.16928	36.2351	-2.3375	0.00087224	0.01166	expressed protein
LOC_Os01g63900	293.395	845.808	-1.5275	0.00071066	0.0099115	WD domain, G-beta repeat domain containing protein, expressed
LOC_Os01g64660	1114.76	2801.17	-1.3293	0.0032063	0.032652	fructose-1,6-bisphosphatase, putative, expressed
LOC_Os01g64880	24.7514	74.1133	-1.5822	0.005248	0.047904	expressed protein
LOC_Os01g65010	86.3749	331.962	-1.9423	0.00015445	0.0028665	serine/threonine-protein kinase receptor precursor, putative, expressed
LOC_Os01g65030	84.1714	320.409	-1.9285	3.932e-05	0.00089013	S-locus-specific glycoprotein precursor, putative, expressed
LOC_Os01g65630	39.6948	378.319	-3.2526	0.00098658	0.012833	expressed protein
LOC_Os01g65880	127.503	1071.91	-3.0716	0.00070152	0.009803	nodulin MtN3 family protein, putative, expressed
LOC_Os01g65920	651.132	1882.23	-1.5314	0.00060634	0.0087217	F-box/LRR-repeat protein 2, putative, expressed
LOC_Os01g65970	86.1304	369.285	-2.1001	1.419e-05	0.00037186	transcription factor HBP-1b, putative, expressed
LOC_Os01g66020	99.0478	345.349	-1.8019	0.0018819	0.021519	protein kinase family protein, putative, expressed
LOC_Os01g66100	553.402	6111.54	-3.4651	7.8101e-09	5.2378e-07	gibberellin 20 oxidase 2, putative, expressed
LOC_Os01g66310	45.1419	145.569	-1.6892	0.00086633	0.011603	expressed protein
LOC_Os01g66620	0	19.2159	#NAME?	0.00015802	0.0029176	glucosyltransferase, putative, expressed
LOC_Os01g66680	94.0982	365.547	-1.9578	3.882e-05	0.00087991	S-domain receptor-like protein kinase, putative, expressed
LOC_Os01g66970	128.244	355.218	-1.4698	0.0019775	0.022343	zinc finger, C3HC4 type domain containing protein, expressed
LOC_Os01g66980	715.523	1786.43	-1.32	0.0027318	0.028737	expressed protein
LOC_Os01g67120	3683.55	8508.81	-1.2079	0.0055395	0.049889	rhodanese-like domain containing protein, putative, expressed
LOC_Os01g67190	7.97472	42.6064	-2.4176	0.00050255	0.0075005	ribonuclease T2 family domain containing protein, expressed
LOC_Os01g67360	173.394	523.645	-1.5945	0.00058341	0.0084531	methyltransferase, putative, expressed
LOC_Os01g68870	36.7157	185.995	-2.3408	3.5604e-06	0.00011434	leucine-rich repeat receptor protein kinase EXS precursor, putative, expressed
LOC_Os01g69080	767.365	1989.1	-1.3741	0.0018867	0.021567	acyl-desaturase, chloroplast precursor, putative, expressed
LOC_Os01g69200	2.3328	25.1849	-3.4324	0.0011364	0.014369	regulatory protein, putative, expressed
LOC_Os01g69840	325.571	1604.81	-2.3014	2.8998e-07	1.2844e-05	expressed protein
LOC_Os01g70310	642.264	1631.84	-1.3453	0.0017639	0.020451	inducer of CBF expression 2, putative, expressed
LOC_Os01g70400	1169.7	3310.82	-1.501	0.00068709	0.0096276	expressed protein
LOC_Os01g71220	92.9103	337.948	-1.8629	9.2783e-05	0.0018518	zinc finger protein, putative, expressed
LOC_Os01g71720	1034.48	4112.79	-1.9912	9.6913e-06	0.00027068	amino acid permease family protein, putative, expressed
LOC_Os01g72350	128.568	341.144	-1.4078	0.0026211	0.027934	amidohydrolase, putative, expressed
LOC_Os01g73280	78.2669	197.137	-1.3327	0.0053971	0.048927	expressed protein
LOC_Os01g73490	2.81015	48.7083	-4.1154	8.2898e-08	4.3069e-06	expressed protein
LOC_Os01g74300	2028.55	6888.12	-1.7637	4.5248e-05	0.00099776	metallothionein, putative, expressed
LOC_Os01g74340	25.9107	80.9195	-1.6429	0.0028105	0.029401	RNA recognition motif containing protein, putative, expressed
LOC_Os02g01060	41.1644	119.8	-1.5412	0.0037025	0.03661	harpin-induced protein 1 domain containing protein, expressed
LOC_Os02g01130	11.562	52.133	-2.1728	0.00062391	0.0089458	expressed protein
LOC_Os02g01765	285.386	705.055	-1.3048	0.004018	0.038975	expressed protein
LOC_Os02g02460	62.2188	161.052	-1.3721	0.0054479	0.049263	transposon protein, putative, unclassified, expressed
LOC_Os02g02910	779.919	2504.29	-1.683	0.0004965	0.0074443	expressed protein
LOC_Os02g03570	111.019	520.542	-2.2292	1.7352e-05	0.00044222	hsp20/alpha crystallin family protein, putative, expressed
LOC_Os02g03670	680.21	4131.67	-2.6027	1.3575e-08	8.5885e-07	expressed protein
LOC_Os02g03790	9.58922	45.6781	-2.252	0.00062782	0.0089874	expressed protein
LOC_Os02g04680	397.969	2140.43	-2.4272	1.2923e-07	6.407e-06	OsSPL3 - SBP-box gene family member, expressed
LOC_Os02g04690	38.1391	379.937	-3.3164	5.6386e-11	6.0345e-09	cycloartenol synthase, putative, expressed
LOC_Os02g05980	46.5596	163.928	-1.8159	0.00036732	0.0058433	phytosulfokine receptor precursor, putative, expressed
LOC_Os02g06250	24.3579	77.9239	-1.6777	0.0027702	0.029039	phytosulfokine receptor precursor, putative, expressed
LOC_Os02g06260	26.8851	84.6251	-1.6543	0.0023425	0.025661	phytosulfokine receptor precursor, putative, expressed
LOC_Os02g07360	2938.74	8154.71	-1.4724	0.0008371	0.011291	pentatricopeptide containing protein, putative, expressed
LOC_Os02g07370	7.09888	51.7428	-2.8657	2.321e-05	0.00056553	retrotransposon protein, putative, unclassified, expressed
LOC_Os02g07380	6.54299	131.466	-4.3286	0.00046754	0.0071025	retrotransposon protein, putative, unclassified, expressed
LOC_Os02g07390	1.74001	50.9337	-4.8715	1.9156e-05	0.00047984	retrotransposon, putative, centromere-specific, expressed
LOC_Os02g07400	4.23701	140.772	-5.0542	0.00052967	0.0078139	retrotransposon protein, putative, unclassified, expressed
LOC_Os02g07680	1170.35	3089.33	-1.4004	0.0017382	0.020253	cytochrome P450, putative, expressed
LOC_Os02g08110	278.586	753.044	-1.4346	0.0017383	0.020253	membrane associated DUF588 domain containing protein, putative, expressed
LOC_Os02g08230	8.46735	33.9439	-2.0032	0.0043426	0.041405	WAX2, putative, expressed
LOC_Os02g09150	2495.35	6920.16	-1.4716	0.001006	0.013034	inorganic H+ pyrophosphatase, putative, expressed
LOC_Os02g09340	194.93	576.551	-1.5645	0.00068387	0.0095863	expressed protein
LOC_Os02g10120	1213.04	15238.1	-3.651	2.041e-05	0.00050839	lipoxygenase, putative, expressed
LOC_Os02g10350	2113.2	5440.03	-1.3642	0.0017514	0.020359	MLO domain containing protein, putative, expressed
LOC_Os02g10390	40010.7	116096	-1.5369	0.00047452	0.0071689	chlorophyll A-B binding protein, putative, expressed
LOC_Os02g10400	47.185	152.792	-1.6952	0.00082356	0.011151	expressed protein
LOC_Os02g10450	8.09389	70.864	-3.1301	0.0019634	0.022209	expressed protein
LOC_Os02g10600	784.922	1914.56	-1.2864	0.0039475	0.038406	OsFBA1 - F-box and FBA domain containing protein, expressed
LOC_Os02g10630	22.8558	95.353	-2.0607	0.00020881	0.003658	GRAM and C2 domains containing protein, putative, expressed
LOC_Os02g10690	37.9315	118.76	-1.6466	0.0030363	0.031268	targeting protein for Xklp2, putative, expressed
LOC_Os02g10880	605.159	1442.23	-1.2529	0.004583	0.043322	UDP-glucoronosyl and UDP-glucosyl transferase domain containing protein, expressed
LOC_Os02g12930	0	7.18035	#NAME?	0.005003	0.04627	expressed protein
LOC_Os02g13060	3006.3	9688.16	-1.6882	0.00017403	0.0031538	expressed protein
LOC_Os02g13620	41.2331	125.534	-1.6062	0.0033048	0.033427	expressed protein
LOC_Os02g13850	479.963	1211.5	-1.3358	0.0026799	0.028333	leucine-rich repeat-containing protein kinase family protein, putative, expressed
LOC_Os02g14170	123.72	791.777	-2.678	0.0053925	0.048898	peroxidase precursor, putative, expressed
LOC_Os02g14970	15.3384	53.2994	-1.797	0.0032212	0.032748	expressed protein
LOC_Os02g15050	20.2237	231.438	-3.5165	0.0040308	0.039035	expressed protein
LOC_Os02g15100	3.53366	82.8403	-4.5511	0.00099585	0.01293	zinc finger, C3HC4 type domain containing protein, expressed
LOC_Os02g15110	35.0848	443.151	-3.6589	0.00335	0.033751	zinc finger, C3HC4 type domain containing protein, expressed
LOC_Os02g15120	616.118	6344.55	-3.3642	0.0012432	0.015429	RING-H2 finger protein, putative, expressed
LOC_Os02g15540	171.58	891.895	-2.378	0.00094744	0.012442	expressed protein
LOC_Os02g15670	15.8675	59.9701	-1.9182	0.0013465	0.016489	expressed protein
LOC_Os02g17780	13.4394	186.947	-3.7981	7.5485e-05	0.0015489	ent-kaurene synthase, chloroplast precursor, putative, expressed
LOC_Os02g17920	1986.3	5416.42	-1.4473	0.00080145	0.01093	glyoxalase family protein, putative, expressed
LOC_Os02g18520	13.9365	52.8558	-1.9232	0.0018142	0.020926	retrotransposon protein, putative, Ty3-gypsy subclass, expressed
LOC_Os02g20190	25.9877	94.6157	-1.8643	0.00057175	0.0083011	Leucine Rich Repeat family protein, expressed
LOC_Os02g20850	8.92083	39.6497	-2.1521	0.002019	0.022759	ras-related protein, putative, expressed
LOC_Os02g21090	7.17935	108.124	-3.9127	1.5078e-05	0.00039112	CPuORF33 - conserved peptide uORF-containing transcript, expressed
LOC_Os02g21810	133.502	785.163	-2.5561	2.0969e-08	1.2513e-06	cytochrome P450 51, putative, expressed
LOC_Os02g22100	2695.88	8076.04	-1.5829	0.0035766	0.035572	OsRhmbd6 - Putative Rhomboid homologue, expressed
LOC_Os02g22570	6.78914	30.8367	-2.1833	0.005478	0.049422	retrotransposon protein, putative, unclassified, expressed
LOC_Os02g24100	121.321	306.23	-1.3358	0.0043687	0.04162	expressed protein
LOC_Os02g24205	10.0498	45.9074	-2.1916	0.00065386	0.0092747	expressed protein
LOC_Os02g24270	20.7572	69.8929	-1.7515	0.0024448	0.026546	retrotransposon protein, putative, unclassified, expressed
LOC_Os02g24642	28.0342	91.5695	-1.7077	0.0014074	0.017111	photosystem II reaction center protein K precursor, putative, expressed
LOC_Os02g26380	0.626289	13.1985	-4.3974	0.0055491	0.04995	expressed protein
LOC_Os02g26390	29.8744	132.283	-2.1466	0.00090747	0.012027	expressed protein
LOC_Os02g27100	51.6934	171.465	-1.7299	0.00047532	0.007178	expressed protein
LOC_Os02g27200	48.1556	125.325	-1.3799	0.0054335	0.049182	expressed protein
LOC_Os02g27400	1610.66	4613.77	-1.5183	0.0006617	0.0093483	OsFBX49 - F-box domain containing protein, expressed
LOC_Os02g27490	1467.11	4252.43	-1.5353	0.00046703	0.0070978	bile acid sodium symporter family protein, putative, expressed
LOC_Os02g27500	1.66294	16.7256	-3.3303	0.0016982	0.019889	Leucine Rich Repeat family protein, expressed
LOC_Os02g28074	498.681	1636.58	-1.7145	0.00015516	0.0028739	XRN 5-3 exonuclease N-terminus family protein, expressed
LOC_Os02g28340	192.074	601.833	-1.6477	0.00032159	0.005237	transferase family protein, putative, expressed
LOC_Os02g29500	287.323	837.494	-1.5434	0.0043258	0.041299	expressed protein
LOC_Os02g30420	8.02497	41.5804	-2.3733	0.00056164	0.0081948	expressed protein
LOC_Os02g30650	147.752	365.8	-1.3079	0.0040973	0.03953	heavy metal-associated domain containing protein, expressed
LOC_Os02g31070	683.095	1607.98	-1.2351	0.0048358	0.045061	expressed protein
LOC_Os02g31140	12.1716	51.7657	-2.0885	0.001166	0.014655	major ampullate spidroin 2-2, putative, expressed
LOC_Os02g31230	6.78246	58.5338	-3.1094	0.0027432	0.028806	expressed protein
LOC_Os02g31910	111.389	309.52	-1.4744	0.0014263	0.017277	potassium transporter, putative, expressed
LOC_Os02g32250	2147.9	6890.16	-1.6816	0.00016415	0.0030058	retrotransposon protein, putative, unclassified, expressed
LOC_Os02g33400	91.3881	289.989	-1.6659	0.00050971	0.0075821	OsFBL9 - F-box domain and LRR containing protein, expressed
LOC_Os02g33780	0.983004	17.2707	-4.135	0.00034922	0.0056053	serine-aspartate repeat-containing protein I precursor, putative, expressed
LOC_Os02g34130	0	9.79835	#NAME?	0.0013699	0.016735	transposon protein, putative, CACTA, En/Spm sub-class, expressed
LOC_Os02g34810	5412.19	12610.8	-1.2204	0.0042426	0.040636	OsAPx8 - Thylakoid-bound Ascorbate Peroxidase encoding gene 5,8, expressed
LOC_Os02g34860	130.248	802.704	-2.6236	1.3377e-06	4.8893e-05	Regulator of chromosome condensation domain containing protein, expressed
LOC_Os02g36150	379.444	970.853	-1.3554	0.0017251	0.020152	cytochrome P450, putative, expressed
LOC_Os02g36220	22.4396	198.146	-3.1424	4.5864e-06	0.00014243	terpene synthase, putative, expressed
LOC_Os02g36264	89.3338	436.944	-2.2902	7.8033e-07	3.1026e-05	terpene synthase, putative, expressed
LOC_Os02g36510	1.07015	15.6151	-3.8671	0.00071096	0.0099115	ethylene-insensitive 3, putative, expressed
LOC_Os02g36850	528.521	1712.39	-1.696	0.00016545	0.003022	oxygen evolving enhancer protein 3, identical, putative, expressed
LOC_Os02g37580	23.8895	97.4072	-2.0276	0.00015135	0.0028163	fimbrin-like protein 2, putative, expressed
LOC_Os02g37600	239.646	613.133	-1.3553	0.0024839	0.026832	expressed protein
LOC_Os02g37610	584.035	1390.63	-1.2516	0.0048287	0.045007	expressed protein
LOC_Os02g37690	223.399	637.464	-1.5127	0.0017537	0.020373	UDP-glucoronosyl and UDP-glucosyl transferase, putative, expressed
LOC_Os02g37834	471.908	1166.85	-1.306	0.0037346	0.036846	expressed protein
LOC_Os02g38120	98.0874	428.768	-2.1281	5.161e-06	0.000157	BTBN3 - Bric-a-Brac, Tramtrack, Broad Complex BTB domain with non-phototropic hypocotyl 3 NPH3 domain, expressed
LOC_Os02g39570	417.012	1284.96	-1.6236	0.00025293	0.0042868	ACT domain containing protein, expressed
LOC_Os02g39710	887.975	2278.15	-1.3593	0.0034192	0.034274	CCT/B-box zinc finger protein, putative, expressed
LOC_Os02g41710	96.1365	268.435	-1.4814	0.0012887	0.015901	cyclic nucleotide-gated ion channel, putative, expressed
LOC_Os02g41800	138.932	392.811	-1.4995	0.00096236	0.012596	auxin response factor, putative, expressed
LOC_Os02g41954	11.5419	49.5784	-2.1028	0.0010412	0.013368	gibberellin 2-beta-dioxygenase 7, putative, expressed
LOC_Os02g42310	922.466	2657.97	-1.5268	0.00043399	0.0067068	OsSCP8 - Putative Serine Carboxypeptidase homologue, expressed
LOC_Os02g42370	275.556	663.867	-1.2685	0.0038201	0.037473	receptor-like protein kinase 2 precursor, putative, expressed
LOC_Os02g42810	407.418	1406.76	-1.7878	7.6052e-05	0.0015597	oxidoreductase, short chain dehydrogenase/reductase family domain containing protein, expressed
LOC_Os02g43170	3.80323	32.2883	-3.0857	0.0052134	0.047746	B-box zinc finger family protein, putative, expressed
LOC_Os02g43194	42.3215	180.223	-2.0903	2.142e-05	0.00052987	aldehyde dehydrogenase, putative, expressed
LOC_Os02g43280	206.299	684.749	-1.7308	0.00010937	0.0021445	aldehyde dehydrogenase, putative, expressed
LOC_Os02g43870	17.3811	95.6966	-2.461	2.1386e-05	0.0005294	inactive receptor kinase At2g26730 precursor, putative, expressed
LOC_Os02g44155	46.5051	129.045	-1.4724	0.0041456	0.039899	expressed protein
LOC_Os02g45310	50.6194	174.471	-1.7852	0.00055536	0.0081192	dehydration response related protein, putative, expressed
LOC_Os02g45460	393.716	1387.77	-1.8175	5.0789e-05	0.0011043	expressed protein
LOC_Os02g45830	11.9737	55.766	-2.2195	0.00046974	0.0071239	expressed protein
LOC_Os02g46750	677.947	1821.78	-1.4261	0.0015543	0.018532	expressed protein
LOC_Os02g46850	60.1129	456.954	-2.9263	0.0003407	0.0054932	oligopeptide transporter, putative, expressed
LOC_Os02g46940	12.8395	49.1392	-1.9363	0.0024735	0.026752	MYB family transcription factor, putative, expressed
LOC_Os02g46980	2095.41	5246.48	-1.3241	0.0026846	0.028374	pentatricopeptide, putative, expressed
LOC_Os02g47020	10771.7	26767.6	-1.3132	0.00237	0.025899	phosphoribulokinase/Uridine kinase family protein, expressed
LOC_Os02g47230	57.9301	150.749	-1.3798	0.0053412	0.048579	Disease resistance/zinc finger/chromosome condensation-like region protein, putative, expressed
LOC_Os02g47330	2.37637	22.6846	-3.2549	0.0021868	0.024291	expressed protein
LOC_Os02g47510	9762.54	43899.9	-2.1689	1.3121e-06	4.8053e-05	9-cis-epoxycarotenoid dioxygenase 1, chloroplast precursor, putative, expressed
LOC_Os02g47605	116.455	315.462	-1.4377	0.0022446	0.024801	expressed protein
LOC_Os02g47640	211.468	565.182	-1.4183	0.0015031	0.018024	OsFBT4 - F-box and tubby domain containing protein, expressed
LOC_Os02g47880	79.0284	290.139	-1.8763	0.0002314	0.0040017	tetratricopeptide repeat domain containing protein, expressed
LOC_Os02g47920	9.08844	83.0827	-3.1924	0.0024905	0.026879	ZOS2-16 - C2H2 zinc finger protein, expressed
LOC_Os02g48900	369.316	993.4	-1.4275	0.0031918	0.032542	aspartic proteinase nepenthesin-1 precursor, putative, expressed
LOC_Os02g49160	1.36654	20.1529	-3.8824	0.0010166	0.013129	OsIAA8 - Auxin-responsive Aux/IAA gene family member, expressed
LOC_Os02g49440	660.576	2618.74	-1.9871	2.599e-05	0.0006235	dof zinc finger domain containing protein, putative, expressed
LOC_Os02g49510	43.6724	125.356	-1.5212	0.0026126	0.027906	amino acid transporter, putative, expressed
LOC_Os02g50560	2053.54	5056.36	-1.3	0.002972	0.030721	DSHCT domain containing protein, expressed
LOC_Os02g51020	1265.87	3990.86	-1.6566	0.0019065	0.021752	expressed protein
LOC_Os02g51900	101.562	351.449	-1.7909	0.0026691	0.028272	cytokinin-O-glucosyltransferase 2, putative, expressed
LOC_Os02g52810	98.5825	331.583	-1.75	0.00027055	0.0045361	remorin C-terminal domain containing protein, putative, expressed
LOC_Os02g53530	194.948	511.249	-1.3909	0.0017283	0.020175	ZOS2-17 - C2H2 zinc finger protein, expressed
LOC_Os02g53840	15.8995	200.229	-3.6546	1.9092e-11	2.2376e-09	subtilisin N-terminal Region family protein, expressed
LOC_Os02g53850	16.7164	99.8854	-2.579	0.0041894	0.040266	OsSub21 - Putative Subtilisin homologue, expressed
LOC_Os02g53960	0.356715	21.6062	-5.9205	0.00032052	0.0052267	CXE carboxylesterase, putative, expressed
LOC_Os02g54730	862.807	2200.26	-1.3506	0.0020779	0.023313	transmembrane amino acid transporter protein, putative, expressed
LOC_Os02g54930	148.779	395.615	-1.4109	0.0023878	0.02603	expressed protein
LOC_Os02g56940	667.828	1823.78	-1.4494	0.0010521	0.013479	expressed protein
LOC_Os02g57020	528.839	1525.86	-1.5287	0.00065646	0.0092932	YCF37, putative, expressed
LOC_Os02g57030	1014.92	2925.39	-1.5273	0.00054777	0.0080378	expressed protein
LOC_Os02g57120	124.043	301.309	-1.2804	0.0052301	0.04785	HEAT repeat family protein, putative, expressed
LOC_Os02g57250	483.55	2245.54	-2.2153	5.8905e-06	0.00017561	OsIAA10 - Auxin-responsive Aux/IAA gene family member, expressed
LOC_Os02g57620	2551.35	7168.18	-1.4903	0.0026212	0.027934	Citrate transporter protein, putative, expressed
LOC_Os02g58120	547.495	1418.98	-1.3739	0.0020434	0.022984	oxidoreductase/ transition metal ion binding protein, putative, expressed
LOC_Os02g58160	111.259	453.416	-2.0269	9.0919e-06	0.00025691	expressed protein
LOC_Os02g58210	10.9759	53.0395	-2.2727	0.0002884	0.0047748	jmjC domain containing protein, expressed
LOC_Os03g01140	212.232	599.766	-1.4988	0.0010892	0.013857	acyl-activating enzyme 11, putative, expressed
LOC_Os03g01580	96.1272	418.79	-2.1232	0.00048419	0.007292	expressed protein
LOC_Os03g01890	435.632	1133.39	-1.3795	0.0021081	0.023585	START domain containing protein, expressed
LOC_Os03g02690	217.802	718.451	-1.7219	0.00014584	0.0027278	dihydrodipicolinate reductase, putative, expressed
LOC_Os03g02830	93.6635	257.513	-1.4591	0.0015305	0.018277	cell cycle control protein, putative, expressed
LOC_Os03g02920	65.5438	171.467	-1.3874	0.0040256	0.039006	peroxidase precursor, putative, expressed
LOC_Os03g03320	50.4251	579.837	-3.5234	0.0054074	0.048995	expressed protein
LOC_Os03g04100	36.4022	102.769	-1.4973	0.0050983	0.04686	expressed protein
LOC_Os03g04680	112.774	1211.77	-3.4256	0.0043205	0.041265	cytochrome P450, putative, expressed
LOC_Os03g05560	4.88345	41.8158	-3.0981	0.0047121	0.044212	zinc finger, C3HC4 type domain containing protein, expressed
LOC_Os03g06120	57.4672	146.313	-1.3482	0.004931	0.045734	PLAC8 family protein, expressed
LOC_Os03g06350	18.1533	73.735	-2.0221	0.00048782	0.0073389	DUF623 domain containing protein, expressed
LOC_Os03g06440	86.8707	286.614	-1.7222	0.00035841	0.0057256	RNA helicase SDE3, putative, expressed
LOC_Os03g06680	76.4565	613.139	-3.0035	0.004233	0.040565	plant-specific domain TIGR01615 family protein, expressed
LOC_Os03g07360	2274.89	7398.2	-1.7014	0.00013028	0.0024798	expressed protein
LOC_Os03g08730	229.495	557.035	-1.2793	0.0047445	0.044422	uroporphyrinogen III synthase, putative, expressed
LOC_Os03g09030	20.4393	63.466	-1.6346	0.0054777	0.049422	expressed protein
LOC_Os03g09120	99.5898	351.958	-1.8213	9.6447e-05	0.0019132	expressed protein
LOC_Os03g10010	0.356715	19.3953	-5.7648	0.0022352	0.024721	expressed protein
LOC_Os03g10090	2428.33	8616.62	-1.8272	4.0592e-05	0.00091256	transporter family protein, putative, expressed
LOC_Os03g11250	199.967	601.957	-1.5899	0.00054809	0.0080391	expressed protein
LOC_Os03g11980	727.358	2352.47	-1.6934	0.00017673	0.0031873	beta-hexosaminidase precursor, putative, expressed
LOC_Os03g12530	160.296	1773.64	-3.4679	7.3521e-05	0.0015164	cation efflux family protein, putative, expressed
LOC_Os03g12730	0.313144	79.1658	-7.9819	0.0005786	0.0083903	receptor protein kinase CLAVATA1 precursor, putative, expressed
LOC_Os03g12790	229.841	883.806	-1.9431	0.0054111	0.049017	MATE efflux family protein, putative, expressed
LOC_Os03g12910	486.208	1193.77	-1.2959	0.003419	0.034274	squalene monooxygenase, putative, expressed
LOC_Os03g13010	594.047	2509.81	-2.0789	3.9233e-06	0.00012433	U-box domain containing protein, expressed
LOC_Os03g14254	257.002	627.873	-1.2887	0.0048929	0.045497	expressed protein
LOC_Os03g14720	50.8635	199.134	-1.969	5.4792e-05	0.0011763	transcription initiation factor IIF, alpha subunit domain containing protein, expressed
LOC_Os03g15190	17.5625	90.7196	-2.3689	0.00033307	0.0053903	expressed protein
LOC_Os03g16580	172.942	494.38	-1.5153	0.0052433	0.047897	expressed protein
LOC_Os03g17174	470.283	1505.05	-1.6782	0.00016145	0.0029687	PsbP, putative, expressed
LOC_Os03g17200	90.5966	3363.87	-5.2145	0.0019245	0.02188	plant-specific domain TIGR01589 family protein, expressed
LOC_Os03g17230	18.9204	73.4938	-1.9577	0.00067853	0.0095339	NAD dependent epimerase/dehydratase family domain containing protein, expressed
LOC_Os03g17840	11.5519	52.4512	-2.1828	0.00055603	0.0081256	expressed protein
LOC_Os03g18140	88.5461	229.084	-1.3714	0.0041956	0.040294	expressed protein
LOC_Os03g18200	4423.31	10720	-1.2771	0.0040215	0.038988	heat shock protein DnaJ, putative, expressed
LOC_Os03g18370	60.6153	243.913	-2.0086	2.6855e-05	0.00064167	MRH1, putative, expressed
LOC_Os03g18540	49.3503	169.189	-1.7775	0.00047025	0.0071255	expressed protein
LOC_Os03g19520	201.662	510.024	-1.3386	0.0029267	0.030341	cyclin-related protein, putative, expressed
LOC_Os03g19740	51.7109	137.773	-1.4138	0.0040167	0.038973	expressed protein
LOC_Os03g19760	3410.9	8370.45	-1.2952	0.0027696	0.029039	HAD-superfamily hydrolase, subfamily IA, variant 3 containing protein, expressed
LOC_Os03g20720	103.928	391.056	-1.9118	0.00013778	0.0026002	GTPase-activating protein, putative, expressed
LOC_Os03g21140	372.931	965.939	-1.373	0.0020825	0.023349	RNA-binding zinc finger protein, putative, expressed
LOC_Os03g21664	1349.27	3602.48	-1.4168	0.0013444	0.016469	expressed protein
LOC_Os03g21890	133.76	331.253	-1.3083	0.0036862	0.03648	potassium transporter, putative, expressed
LOC_Os03g22040	18.6107	59.6789	-1.6811	0.0037018	0.03661	expressed protein
LOC_Os03g22050	2145.59	5975.26	-1.4776	0.00093518	0.012312	CAMK_KIN1/SNF1/Nim1_like.16 - CAMK includes calcium/calmodulin depedent protein kinases, expressed
LOC_Os03g22634	471.409	1933.7	-2.0363	0.0053779	0.048839	terpene synthase, putative, expressed
LOC_Os03g22960	19.5535	70.2578	-1.8452	0.0054974	0.04956	expressed protein
LOC_Os03g23050	2.09672	16.321	-2.9605	0.0036769	0.036407	expressed protein
LOC_Os03g25420	68.7313	205.488	-1.58	0.0019226	0.021866	expressed protein
LOC_Os03g25910	4.67907	43.9065	-3.2301	0.00057093	0.0082926	expressed protein
LOC_Os03g26044	465.532	1405.06	-1.5937	0.00044894	0.0068931	CSLA5 - cellulose synthase-like family A; mannan synthase, expressed
LOC_Os03g26130	3.19369	29.7455	-3.2194	0.00021756	0.0037899	MYB family transcription factor, putative, expressed
LOC_Os03g26490	40.3718	111.578	-1.4666	0.0039889	0.038756	expressed protein
LOC_Os03g26500	6.04889	50.8203	-3.0707	0.0010283	0.013227	expressed protein
LOC_Os03g28300	1645.5	4636.01	-1.4944	0.00092781	0.012242	protein kinase domain containing protein, expressed
LOC_Os03g36419	595.019	1562.72	-1.393	0.0020452	0.022991	expressed protein
LOC_Os03g36540	2485.02	6095.41	-1.2945	0.0029297	0.030363	magnesium-chelatase subunit chlI, chloroplast precursor, putative, expressed
LOC_Os03g36960	122.374	319.291	-1.3836	0.0031932	0.032546	expressed protein
LOC_Os03g38330	16.7064	67.5687	-2.0159	0.00070855	0.0098895	disease resistance RPP13-like protein 1, putative, expressed
LOC_Os03g38540	207.685	1874.82	-3.1743	0.00038597	0.0060858	folic acid binding protein, putative, expressed
LOC_Os03g40550	547.613	1332.74	-1.2832	0.0037575	0.037011	kinase, pfkB family, putative, expressed
LOC_Os03g40560	17.9509	72.5398	-2.0147	0.00054979	0.0080576	retrotransposon protein, putative, unclassified, expressed
LOC_Os03g40570	2.0029	19.4478	-3.2794	0.0010253	0.013211	retrotransposon protein, putative, unclassified, expressed
LOC_Os03g41030	29.6063	186.839	-2.6578	0.0040699	0.039322	expressed protein
LOC_Os03g41060	21.2719	74.0921	-1.8004	0.0014641	0.01765	GASR2 - Gibberellin-regulated GASA/GAST/Snakin family protein precursor, putative, expressed
LOC_Os03g42569	0.696682	18.5362	-4.7337	0.00063715	0.0090914	expressed protein
LOC_Os03g43010	186.551	777.583	-2.0594	0.00055458	0.008111	expressed protein
LOC_Os03g43130	0	19.1414	#NAME?	2.185e-06	7.4741e-05	transposon protein, putative, unclassified
LOC_Os03g43860	37.3291	110.597	-1.5669	0.0021965	0.024384	SNF7 domain containing protein, putative, expressed
LOC_Os03g43990	50.5653	270.94	-2.4218	7.2773e-07	2.913e-05	BTBN8 - Bric-a-Brac, Tramtrack, Broad Complex BTB domain with non-phototropic hypocotyl 3 NPH3 and coiled-coil domains, expressed
LOC_Os03g44870	18.5555	57.8041	-1.6393	0.0045291	0.042908	expressed protein
LOC_Os03g45779	667.095	1806.72	-1.4374	0.0011014	0.013981	expressed protein
LOC_Os03g46260	9.51215	102.121	-3.4244	5.7846e-06	0.00017318	DUF581 domain containing protein, expressed
LOC_Os03g46410	46.1809	123.361	-1.4175	0.0052607	0.047995	transmembrane protein 56, putative, expressed
LOC_Os03g47169	5.40585	54.3389	-3.3294	2.3354e-05	0.00056826	Peptidase family C50, putative, expressed
LOC_Os03g47470	206.166	526.52	-1.3527	0.0024722	0.026752	STE_PAK_Ste20_STLK.4 - STE kinases include homologs to sterile 7, sterile 11 and sterile 20 from yeast, expressed
LOC_Os03g47610	19734.2	46145.9	-1.2255	0.0049507	0.045881	thiamine biosynthesis protein thiC, putative, expressed
LOC_Os03g48030	19.5031	77.9561	-1.999	0.00045639	0.0069657	integral membrane HPP family protein, putative, expressed
LOC_Os03g48300	623.068	1702.03	-1.4498	0.0012352	0.015356	histidine acid phosphatase, putative, expressed
LOC_Os03g49510	1255.1	2998.57	-1.2565	0.0041412	0.039867	phosphatidylinositol-4-phosphate 5-kinase, putative, expressed
LOC_Os03g50080	2454.37	6467.84	-1.3979	0.0015593	0.018573	peptidyl-prolyl cis-trans isomerase, FKBP-type, putative, expressed
LOC_Os03g50310	2775.57	11506.6	-2.0516	0.00014249	0.0026764	CCT/B-box zinc finger protein, putative, expressed
LOC_Os03g51920	282.721	1253.66	-2.1487	2.702e-06	9.0096e-05	peptidase, M50 family, putative, expressed
LOC_Os03g52239	3532.47	11572.4	-1.7119	0.00011892	0.0022977	homeobox domain containing protein, expressed
LOC_Os03g52460	1008.45	3105.86	-1.6228	0.00022046	0.0038348	glucose-1-phosphate adenylyltransferase large subunit, putative, expressed
LOC_Os03g53710	2543.11	7442.43	-1.5492	0.00046837	0.0071061	aldose 1-epimerase, putative, expressed
LOC_Os03g54930	4.11637	29.1641	-2.8247	0.0014085	0.017119	VIP4, putative, expressed
LOC_Os03g55100	559.607	3319.91	-2.5687	0.0033494	0.033751	cyclic nucleotide-gated ion channel 2, putative, expressed
LOC_Os03g55460	16.6044	57.568	-1.7937	0.0025977	0.027826	expressed protein
LOC_Os03g55470	35.1159	124.745	-1.8288	0.00047936	0.0072329	expressed protein
LOC_Os03g55990	188.772	1337.95	-2.8253	0.0032389	0.032881	homeobox domain containing protein, expressed
LOC_Os03g56270	38.9445	169.603	-2.1227	0.00011385	0.0022202	receptor protein kinase CLAVATA1 precursor, putative, expressed
LOC_Os03g56280	16324	38858.9	-1.2513	0.0037232	0.03676	lactate/malate dehydrogenase, putative, expressed
LOC_Os03g56320	110.944	471.851	-2.0885	8.0476e-06	0.00023142	expressed protein
LOC_Os03g56900	212.804	525.399	-1.3039	0.0043939	0.041826	reticulon domain containing protein, putative, expressed
LOC_Os03g56950	1007.44	3581.34	-1.8298	0.0028415	0.029621	phytochrome-interacting factor 4, putative, expressed
LOC_Os03g57149	1683.68	4601.74	-1.4506	0.00097032	0.012678	mTERF domain containing protein, expressed
LOC_Os03g57190	12.0126	46.2139	-1.9438	0.0023791	0.025959	TCP family transcription factor, putative, expressed
LOC_Os03g57240	745.197	6402.71	-3.103	0.0001184	0.0022902	ZOS3-19 - C2H2 zinc finger protein, expressed
LOC_Os03g57260	31.3126	122.318	-1.9658	0.00019372	0.0034382	GRF zinc finger family protein, expressed
LOC_Os03g57330	16.1772	222.613	-3.7825	8.4136e-09	5.5836e-07	IQ calmodulin-binding motif domain containing protein, expressed
LOC_Os03g57420	95.164	332.877	-1.8065	0.00011312	0.0022088	ML domain protein, putative, expressed
LOC_Os03g58940	366.885	1347.41	-1.8768	0.0010247	0.013209	LTPL83 - Protease inhibitor/seed storage/LTP family protein precursor, putative, expressed
LOC_Os03g59090	2343.38	7100.11	-1.5992	0.00026034	0.0043936	retrotransposon protein, putative, unclassified, expressed
LOC_Os03g59264	1172.15	2760.65	-1.2358	0.004861	0.045237	calreticulin family protein, expressed
LOC_Os03g59340	153.941	895.942	-2.541	3.3562e-05	0.00077951	CESA2 - cellulose synthase, expressed
LOC_Os03g59430	866.845	2871.26	-1.7278	0.00024877	0.0042224	uncharacterized glycosyltransferase, putative, expressed
LOC_Os03g59640	1939.42	4485.38	-1.2096	0.0054645	0.04935	magnesium-chelatase subunit chlD, chloroplast precursor, putative, expressed
LOC_Os03g60350	42.4422	178.487	-2.0722	4.2768e-05	0.00095072	leaf senescence related protein, putative, expressed
LOC_Os03g60480	73.3505	334.701	-2.19	5.3499e-06	0.00016165	heavy metal-associated domain containing protein, expressed
LOC_Os03g60639	287.173	1158.35	-2.0121	2.5706e-05	0.00061835	expressed protein
LOC_Os03g61040	57.2491	360.018	-2.6527	4.4582e-08	2.4367e-06	GIL1, putative, expressed
LOC_Os03g61800	180.074	487.955	-1.4382	0.0020454	0.022991	polygalacturonase, putative, expressed
LOC_Os03g62090	30.8495	108.66	-1.8165	0.00049751	0.0074533	CESA5 - cellulose synthase, expressed
LOC_Os03g62110	454.284	1283.8	-1.4988	0.00068097	0.0095607	nicotinate phosphoribosyltransferase family domain containing protein, expressed
LOC_Os03g62270	254.389	834.618	-1.7141	0.00018968	0.0033799	MATE efflux family protein, putative, expressed
LOC_Os03g62300	26.1869	84.9511	-1.6978	0.0019674	0.022248	expressed protein
LOC_Os03g62670	871.298	5000	-2.5207	5.836e-06	0.00017427	expressed protein
LOC_Os03g62690	273.179	722.568	-1.4033	0.0017973	0.020764	pentatricopeptide, putative, expressed
LOC_Os03g62780	903.148	2241.94	-1.3117	0.0025325	0.027242	S1 RNA binding domain containing protein, expressed
LOC_Os03g63150	53.3196	313.415	-2.5553	0.001083	0.013797	powdery mildew resistance protein PM3b, putative, expressed
LOC_Os03g63970	93.5849	432.731	-2.2091	0.0033395	0.033693	gibberellin 20 oxidase 1, putative, expressed
LOC_Os03g64020	6537.03	17992.4	-1.4607	0.00077816	0.010629	expressed protein
LOC_Os03g64030	29.9335	107.842	-1.8491	0.0049202	0.04567	receptor protein kinase, putative, expressed
LOC_Os03g64140	312.257	798.471	-1.3545	0.0021537	0.023998	expressed protein
LOC_Os03g64320	9.38811	94.3229	-3.3287	5.7459e-05	0.0012269	expressed protein
LOC_Os03g64415	40.2393	116.312	-1.5313	0.0025083	0.027031	kinesin motor domain containing protein, putative, expressed
LOC_Os04g02510	15.7388	58.009	-1.8819	0.002867	0.029834	ZOS4-01 - C2H2 zinc finger protein, expressed
LOC_Os04g03050	10.1384	46.7819	-2.2061	0.00074965	0.010327	OsSub34 - Putative Subtilisin homologue, expressed
LOC_Os04g03740	197.03	509.905	-1.3718	0.0024734	0.026752	expressed protein
LOC_Os04g11390	994.28	3951.17	-1.9906	6.4481e-06	0.00019033	expressed protein
LOC_Os04g11400	2748.56	10812.2	-1.9759	1.0139e-05	0.00027999	expressed protein
LOC_Os04g12140	242.541	594.556	-1.2936	0.003612	0.035874	expressed protein
LOC_Os04g12460	31.7719	99.6385	-1.649	0.00184	0.021168	Leucine Rich Repeat family protein, expressed
LOC_Os04g12499	41.0278	348.823	-3.0878	3.6765e-09	2.6336e-07	amino acid transporter protein, putative, expressed
LOC_Os04g12520	10.4449	89.163	-3.0936	3.226e-07	1.4114e-05	transposon protein, putative, unclassified, expressed
LOC_Os04g12530	30.501	257.167	-3.0758	3.7659e-07	1.6152e-05	amino acid transporter family protein, putative, expressed
LOC_Os04g14260	7.6764	42.9491	-2.4841	0.00041845	0.0065117	transposon protein, putative, CACTA, En/Spm sub-class, expressed
LOC_Os04g14410	22.5843	91.1047	-2.0122	0.00032878	0.0053395	expressed protein
LOC_Os04g14770	5.84971	167.341	-4.8383	0.0011302	0.014301	retrotransposon protein, putative, unclassified, expressed
LOC_Os04g16680	9460.32	22266.7	-1.2349	0.0041906	0.040267	fructose-1,6-bisphosphatase, putative, expressed
LOC_Os04g16740	55.1371	185.843	-1.753	0.00034546	0.0055598	ATP synthase subunit alpha, putative, expressed
LOC_Os04g20164	10186.9	27983.4	-1.4579	0.0010493	0.013459	amine oxidase precursor, putative, expressed
LOC_Os04g20400	2.12354	27.6506	-3.7028	3.4115e-05	0.00078979	cytokinin-O-glucosyltransferase 1, putative, expressed
LOC_Os04g21320	392.39	925.946	-1.2386	0.0046128	0.043437	membrane associated DUF588 domain containing protein, putative, expressed
LOC_Os04g23760	8.06854	49.5852	-2.6195	9.9972e-05	0.0019796	lectin protein kinase family protein, putative, expressed
LOC_Os04g24110	9.89421	49.7655	-2.3305	0.00024803	0.0042136	anthocyanin 3-O-beta-glucosyltransferase, putative, expressed
LOC_Os04g24750	20.9353	94.5581	-2.1753	8.1941e-05	0.0016614	aspartic proteinase nepenthesin precursor, putative, expressed
LOC_Os04g25784	257.189	760.375	-1.5639	0.00064402	0.0091605	expressed protein
LOC_Os04g26834	110.786	520.75	-2.2328	1.4478e-06	5.2328e-05	eukaryotic aspartyl protease domain containing protein, expressed
LOC_Os04g27250	1515.52	3607.53	-1.2512	0.0047448	0.044422	expressed protein
LOC_Os04g27790	148.537	2005.31	-3.7549	4.0288e-15	9.6007e-13	terpene synthase, putative, expressed
LOC_Os04g29680	16.8121	76.3504	-2.1831	0.00013169	0.0025012	OsWAK38 - OsWAK receptor-like protein kinase, expressed
LOC_Os04g31870	29.076	215.112	-2.8872	1.9234e-08	1.1594e-06	expressed protein
LOC_Os04g32850	11.4149	283.018	-4.6319	0.0013856	0.016892	basic proline-rich protein, putative, expressed
LOC_Os04g33200	37.9079	107.056	-1.4978	0.0041968	0.040294	heparan-alpha-glucosaminide N-acetyltransferase, putative, expressed
LOC_Os04g33460	869.599	2101.92	-1.2733	0.0045982	0.043351	1,4-alpha-glucan-branching enzyme 2, chloroplast precursor, putative, expressed
LOC_Os04g33500	55.7864	236.822	-2.0858	2.4773e-05	0.00059994	protein kinase, putative, expressed
LOC_Os04g33630	89.0931	307.839	-1.7888	0.0001363	0.0025737	2Fe-2S iron-sulfur cluster binding domain containing protein, expressed
LOC_Os04g33660	335.515	1255.88	-1.9043	2.161e-05	0.00053345	bifunctional monodehydroascorbate reductase and carbonic anhydrasenectarin-3 precursor, putative, expressed
LOC_Os04g33900	33.4845	256.654	-2.9383	0.00081083	0.011029	ctr copper transporter family protein, putative, expressed
LOC_Os04g33990	167.085	468.791	-1.4884	0.0011957	0.014961	harpin-induced protein 1 domain containing protein, expressed
LOC_Os04g34250	48.1952	166.163	-1.7856	0.00033722	0.0054469	serine/threonine-protein kinase receptor precursor, putative, expressed
LOC_Os04g34290	185.609	826.911	-2.1555	2.3318e-06	7.8945e-05	protein kinase, putative, expressed
LOC_Os04g34300	4.23034	30.4447	-2.8473	0.000667	0.0094014	serine/threonine-protein kinase receptor precursor, putative, expressed
LOC_Os04g34320	146.76	574.274	-1.9683	1.5139e-05	0.00039212	S-domain receptor-like protein kinase, putative, expressed
LOC_Os04g35420	39.1586	119.802	-1.6133	0.00192	0.021857	helicase conserved C-terminal domain containing protein, expressed
LOC_Os04g37520	10.904	85.1457	-2.9651	5.2382e-07	2.1696e-05	extracellular ligand-gated ion channel, putative, expressed
LOC_Os04g38026	953.048	2614.73	-1.456	0.00081542	0.01107	transporter family protein, putative, expressed
LOC_Os04g38042	23.0704	139.023	-2.5912	0.0025457	0.02735	retrotransposon protein, putative, unclassified, expressed
LOC_Os04g39864	11.1733	52.2201	-2.2246	0.00076657	0.010502	Os4bglu11 - beta-glucosidase homologue, similar to Os4Bglu12 exoglucanase/beta-glucosidase, expressed
LOC_Os04g39930	36.5868	345.381	-3.2388	5.4746e-06	0.00016486	receptor-like protein kinase, putative, expressed
LOC_Os04g39940	1.07015	11.807	-3.4638	0.0052663	0.048013	brevis radix, putative, expressed
LOC_Os04g40040	902.655	2360.89	-1.3871	0.0016067	0.019005	copper methylamine oxidase precursor, putative, expressed
LOC_Os04g41630	356.81	984.434	-1.4641	0.0011337	0.014339	expressed protein
LOC_Os04g42120	1.00983	18.0113	-4.1567	0.00022298	0.0038766	N-acetyltransferase ESCO2, putative, expressed
LOC_Os04g42870	137.787	374.499	-1.4425	0.0016206	0.019131	methyltransferase domain containing protein, putative, expressed
LOC_Os04g43390	436.251	1510.19	-1.7915	6.3424e-05	0.0013328	Os4bglu16 - monolignol beta-glucoside homologue, expressed
LOC_Os04g43710	73.8646	3362.24	-5.5084	2.8568e-05	0.00067716	CAMK_CAMK_like.3 - CAMK includes calcium/calmodulin depedent protein kinases, expressed
LOC_Os04g44850	7.68353	37.5446	-2.2888	0.00086138	0.011548	glycosyl transferase 8 domain containing protein, putative, expressed
LOC_Os04g44870	22.7926	66.4504	-1.5437	0.0049747	0.046068	C2 domain containing protein, putative, expressed
LOC_Os04g45070	11503.9	26994.9	-1.2306	0.0051761	0.047466	remorin, putative, expressed
LOC_Os04g45270	5.40585	31.3851	-2.5375	0.00088974	0.011849	aspartyl protease family protein, putative, expressed
LOC_Os04g45460	76.997	199.149	-1.371	0.005451	0.049278	cysteine-rich repeat secretory protein precursor, putative, expressed
LOC_Os04g46160	26.3425	92.7629	-1.8162	0.00080962	0.011016	expressed protein
LOC_Os04g46280	976.307	3286.96	-1.7513	9.3514e-05	0.0018643	hydrolase, NUDIX family, domain containing protein, expressed
LOC_Os04g46350	66.2141	283.575	-2.0985	1.7774e-05	0.00045106	homeobox associated leucine zipper, putative, expressed
LOC_Os04g46610	1014.26	2464.14	-1.2807	0.0039385	0.03835	PAP fibrillin family domain containing protein, expressed
LOC_Os04g47140	136.255	385.422	-1.5001	0.001484	0.017854	expressed protein
LOC_Os04g49060	28.1265	111.38	-1.9855	0.00015517	0.0028739	H-BTB3 - Bric-a-Brac, Tramtrack, Broad Complex BTB domain with H family conserved sequence, expressed
LOC_Os04g49550	34.9776	122.409	-1.8072	0.00049773	0.0074534	RING-H2 finger protein ATL2A, putative, expressed
LOC_Os04g50890	93.1158	342.204	-1.8778	0.00020303	0.0035697	secretory carrier-associated membrane protein, putative, expressed
LOC_Os04g51390	311.615	912.253	-1.5497	0.00046679	0.0070971	aldose 1-epimerase, putative, expressed
LOC_Os04g51454	448.152	1212.32	-1.4357	0.0014188	0.017209	expressed protein
LOC_Os04g51580	205.336	540.929	-1.3975	0.0020242	0.022811	leucine rich repeat containing protein, expressed
LOC_Os04g52230	332.884	948.828	-1.5111	0.00064179	0.0091324	ent-kaurene synthase, chloroplast precursor, putative, expressed
LOC_Os04g53214	1222.5	2943.49	-1.2677	0.0050444	0.046532	hydroxyacid oxidase 1, putative, expressed
LOC_Os04g53580	4.11637	43.0135	-3.3853	6.9857e-05	0.0014484	P21-Rho-binding domain containing protein, putative, expressed
LOC_Os04g53750	55.8223	266.782	-2.2567	5.736e-05	0.0012255	retrotransposon protein, putative, Ty3-gypsy subclass, expressed
LOC_Os04g53920	13.8449	69.0778	-2.3189	6.2664e-05	0.0013197	leucoanthocyanidin reductase, putative, expressed
LOC_Os04g54070	181.599	578.563	-1.6717	0.00019564	0.0034653	receptor-like kinase, putative, expressed
LOC_Os04g54240	16.2765	838.63	-5.6872	0.0052335	0.047857	wound induced protein, putative, expressed
LOC_Os04g54310	4.62542	164.21	-5.1498	0.0023878	0.02603	expressed protein
LOC_Os04g54320	398.509	1117.23	-1.4872	0.0010081	0.013052	expressed protein
LOC_Os04g54600	3.42977	47.3939	-3.7885	0.005149	0.047253	DUF617 domain containing protein, expressed
LOC_Os04g54640	463.071	1692.4	-1.8698	3.1099e-05	0.00072989	peptidase, cysteine peptidase active site, putative, expressed
LOC_Os04g55570	17.8522	99.8924	-2.4843	8.1841e-06	0.00023403	plant protein of unknown function DUF869 domain containing protein, expressed
LOC_Os04g55800	1531.03	3917.75	-1.3555	0.0015631	0.018606	sulfate transporter, putative, expressed
LOC_Os04g56370	28.2314	93.7016	-1.7308	0.0014793	0.017822	expressed protein
LOC_Os04g57130	9.63426	140.42	-3.8654	4.6945e-06	0.00014478	dirigent-like protein pDIR17, putative, expressed
LOC_Os04g57140	294.235	706.502	-1.2637	0.0037817	0.037198	kinesin motor domain containing protein, putative, expressed
LOC_Os04g57560	1489.97	4564.19	-1.6151	0.00027197	0.0045535	amine oxidase, flavin-containing, domain containing protein, expressed
LOC_Os04g58504	8.65793	50.501	-2.5442	0.00013218	0.0025078	choline transporter-related, putative, expressed
LOC_Os04g58910	79.9636	320.066	-2.001	1.8334e-05	0.00046249	receptor protein kinase TMK1 precursor, putative, expressed
LOC_Os04g59380	4.9002	24.7362	-2.3357	0.0029475	0.03053	ZOS4-14 - C2H2 zinc finger protein, expressed
LOC_Os05g01120	170.05	1164.85	-2.7761	3.2209e-06	0.00010467	cytochrome P450, putative, expressed
LOC_Os05g01350	24.7901	512.708	-4.3703	0.0039335	0.038322	retrotransposon protein, putative, unclassified, expressed
LOC_Os05g01530	159.843	540.766	-1.7583	0.00022621	0.0039289	expressed protein
LOC_Os05g02240	379.643	1020.33	-1.4263	0.0011165	0.014149	ATCHX20, putative, expressed
LOC_Os05g03040	3790.65	9742.29	-1.3618	0.0047705	0.044627	AP2 domain containing protein, expressed
LOC_Os05g03900	144.39	503.508	-1.802	0.00011506	0.00224	WRKY109, expressed
LOC_Os05g04170	340.148	1062.66	-1.6434	0.0002515	0.0042647	AMP-binding enzyme, putative, expressed
LOC_Os05g04610	129.652	447.2	-1.7863	0.0012015	0.015011	ABC transporter, ATP-binding protein, putative, expressed
LOC_Os05g05820	97.2136	243.085	-1.3222	0.0050836	0.046749	pro-resilin precursor, putative, expressed
LOC_Os05g06530	59.2229	219.805	-1.892	0.00012081	0.0023291	expressed protein
LOC_Os05g07140	46.2278	178.266	-1.9472	0.00053252	0.0078494	zinc finger, C3HC4 type domain containing protein, expressed
LOC_Os05g07880	31.8992	197.507	-2.6303	2.6322e-07	1.1791e-05	phospholipase D, putative, expressed
LOC_Os05g07980	20.4541	90.1339	-2.1397	0.00020791	0.0036447	DUF630/DUF632 domains containing protein, putative, expressed
LOC_Os05g11064	379.632	1133.61	-1.5783	0.00042587	0.0066071	expressed protein
LOC_Os05g11260	3140.19	10724.7	-1.772	6.3921e-05	0.0013417	expressed protein
LOC_Os05g11320	5644.56	23947.7	-2.085	2.4483e-05	0.00059372	metallothionein-like protein 3B, putative, expressed
LOC_Os05g11428	329.157	1111.21	-1.7553	7.1335e-05	0.0014748	expressed protein
LOC_Os05g12320	18.8752	338.401	-4.1642	0.0015308	0.018277	nodulin MtN3 family protein, putative, expressed
LOC_Os05g12380	54.3227	205.545	-1.9198	0.00011627	0.0022575	expressed protein
LOC_Os05g12630	0.339967	45.8636	-7.0758	0.0021905	0.024325	expressed protein
LOC_Os05g13860	220.705	771.777	-1.8061	0.0027597	0.028953	expressed protein
LOC_Os05g15160	370.097	1139.45	-1.6224	0.000321	0.0052298	phosphate/phosphate translocator, putative, expressed
LOC_Os05g15510	89.2534	274.102	-1.6187	0.0015532	0.018525	cellulase, putative, expressed
LOC_Os05g15520	74.984	288.82	-1.9455	4.6195e-05	0.0010149	DNA-binding protein-related, putative, expressed
LOC_Os05g15940	0	11.691	#NAME?	0.0050617	0.046596	retrotransposon protein, putative, unclassified, expressed
LOC_Os05g17990	3.01941	20.5151	-2.7644	0.0023679	0.025884	expressed protein
LOC_Os05g18294	63.6736	355.951	-2.4829	2.5031e-07	1.1269e-05	SEC14 cytosolic factor family protein, putative, expressed
LOC_Os05g18470	129.395	325.152	-1.3293	0.0033044	0.033427	CRAL/TRIO domain containing protein, expressed
LOC_Os05g20430	26.6691	129.496	-2.2797	1.7739e-05	0.00045066	retrotransposon protein, putative, unclassified, expressed
LOC_Os05g20450	100.526	386.559	-1.9431	4.0857e-05	0.00091678	retrotransposon protein, putative, unclassified, expressed
LOC_Os05g20460	119.395	466.498	-1.9661	2.296e-05	0.00056021	retrotransposon protein, putative, unclassified, expressed
LOC_Os05g20470	19.607	103.757	-2.4038	1.382e-05	0.00036404	expressed protein
LOC_Os05g25370	206.381	1041.36	-2.3351	1.0565e-05	0.0002896	TKL_IRAK_CrRLK1L-1.2 - The CrRLK1L-1 subfamily has homology to the CrRLK1L homolog, expressed
LOC_Os05g25480	15.2732	75.8475	-2.3121	5.5885e-05	0.0011969	OsMan06 - Endo-Beta-Mannanase, expressed
LOC_Os05g25974	88.7742	250.779	-1.4982	0.0017451	0.020319	expressed protein
LOC_Os05g26040	110.505	374.225	-1.7598	0.00020641	0.0036239	pumilio-family RNA binding repeat containing protein, expressed
LOC_Os05g26760	35.3573	150.741	-2.092	5.6001e-05	0.0011986	expressed protein
LOC_Os05g28180	502.768	1854.46	-1.883	2.8906e-05	0.00068473	AMP deaminase, putative, expressed
LOC_Os05g28520	101.616	328.574	-1.6931	0.0002454	0.0041851	MRH1, putative, expressed
LOC_Os05g28630	315.612	795.434	-1.3336	0.0030706	0.03154	leaf senescence related protein, putative, expressed
LOC_Os05g29750	25.7977	111.896	-2.1168	0.00012453	0.0023894	cytochrome P450 71E1, putative, expressed
LOC_Os05g30220	394.068	2405.15	-2.6096	1.6423e-08	1.021e-06	disease resistance RPP13-like protein 1, putative, expressed
LOC_Os05g31750	205.271	807.87	-1.9766	1.0878e-05	0.00029703	annexin, putative, expressed
LOC_Os05g31760	82.0833	338.229	-2.0428	1.4316e-05	0.00037461	annexin, putative, expressed
LOC_Os05g32140	1683.15	3909.51	-1.2158	0.0051731	0.04745	NAD dependent epimerase/dehydratase family protein, putative, expressed
LOC_Os05g32770	4.42952	62.4639	-3.8178	7.7251e-05	0.0015788	expressed protein
LOC_Os05g32970	93.1989	275.967	-1.5661	0.0011711	0.014702	expressed protein
LOC_Os05g33670	14.8978	141.947	-3.2522	9.5714e-05	0.0019007	expressed protein
LOC_Os05g33680	18.5068	77.2476	-2.0614	0.00031221	0.0051005	expressed protein
LOC_Os05g34170	167.193	1141.57	-2.7714	0.00065539	0.0092853	tubulin/FtsZ domain containing protein, putative, expressed
LOC_Os05g34780	4.66559	29.4086	-2.6561	0.00077203	0.010561	retrotransposon protein, putative, Ty3-gypsy subclass, expressed
LOC_Os05g35420	30.1357	86.9453	-1.5286	0.0043898	0.041799	expressed protein
LOC_Os05g35470	5362.78	22202.7	-2.0497	5.4033e-06	0.00016313	dienelactone hydrolase family protein, expressed
LOC_Os05g35500	157.541	514.915	-1.7086	0.0053868	0.048862	MYB family transcription factor, putative, expressed
LOC_Os05g35520	476.711	1199.1	-1.3308	0.0026328	0.028009	deoxynucleoside kinase family, putative, expressed
LOC_Os05g35540	1112.38	2720.62	-1.2903	0.0032818	0.033242	GTPase of unknown function domain containing protein, putative, expressed
LOC_Os05g35570	32.9608	164.429	-2.3186	7.7433e-06	0.00022375	DUF803 domain containing, putative, expressed
LOC_Os05g35910	36.3815	153.35	-2.0756	7.3898e-05	0.0015207	expressed protein
LOC_Os05g36020	2.36629	55.0923	-4.5411	0.0010036	0.013008	expressed protein
LOC_Os05g36030	0.696682	42.6572	-5.9361	0.0010664	0.013633	retrotransposon, putative, centromere-specific
LOC_Os05g36040	1.07015	72.0033	-6.0722	3.5437e-05	0.00081721	retrotransposon protein, putative, unclassified, expressed
LOC_Os05g36994	3144.3	7409.49	-1.2366	0.0049088	0.045602	expressed protein
LOC_Os05g37350	65.8987	282.378	-2.0993	1.4899e-05	0.00038788	hhH-GPD superfamily base excision DNA repair protein, expressed
LOC_Os05g37900	33.1518	145.655	-2.1354	0.00027089	0.0045395	zinc finger, C3HC4 type domain containing protein, expressed
LOC_Os05g38280	1.29615	12.9539	-3.3211	0.0053201	0.048425	expressed protein
LOC_Os05g38680	46.999	2157.68	-5.5207	1.3109e-05	0.00034761	plant-specific domain TIGR01589 family protein, expressed
LOC_Os05g38980	4.27198	31.2606	-2.8714	0.00029384	0.0048492	respiratory burst oxidase, putative, expressed
LOC_Os05g39230	1321.69	3612.78	-1.4507	0.00094619	0.01243	low photochemical bleaching 1 protein, putative, expressed
LOC_Os05g39800	109.811	378.692	-1.786	0.0033671	0.033894	NFD4, putative, expressed
LOC_Os05g39840	0	7.15495	#NAME?	0.0050474	0.046536	expressed protein
LOC_Os05g40000	5.30716	226.125	-5.413	4.534e-06	0.0001413	expressed protein
LOC_Os05g40010	617.632	4045.19	-2.7114	0.002057	0.0231	LTPL17 - Protease inhibitor/seed storage/LTP family protein precursor, expressed
LOC_Os05g40020	127.482	867.509	-2.7666	0.0011482	0.014492	RING-H2 finger protein, putative, expressed
LOC_Os05g40410	183.53	668.261	-1.8644	5.1137e-05	0.0011112	expressed protein
LOC_Os05g40540	71.7383	255.918	-1.8349	0.00018825	0.0033611	expressed protein
LOC_Os05g41190	1029.25	3344.06	-1.7	0.00014079	0.0026501	expressed protein
LOC_Os05g41640	10889.3	25137.2	-1.2069	0.0050588	0.046592	phosphoglycerate kinase protein, putative, expressed
LOC_Os05g44180	7.73525	72.4652	-3.2278	3.4094e-05	0.00078979	osFTL10 FT-Like10 homologous to Flowering Locus T gene; contains Pfam profile PF01161: Phosphatidylethanolamine-binding protein, expressed
LOC_Os05g44560	174.861	830.911	-2.2485	0.0039119	0.038148	kinesin motor domain containing protein, expressed
LOC_Os05g45930	13.2201	84.6625	-2.679	4.5734e-06	0.00014215	IQ calmodulin-binding motif family protein, putative, expressed
LOC_Os05g47560	3206.83	7556.27	-1.2365	0.0046292	0.043566	serine/threonine-protein kinase SNT7, chloroplast precursor, putative, expressed
LOC_Os05g48580	0	7.60526	#NAME?	0.0038123	0.037447	expressed protein
LOC_Os05g48790	551.21	1430.64	-1.376	0.0024325	0.026437	expressed protein
LOC_Os05g48870	344.441	896.286	-1.3797	0.002117	0.023653	auxin response factor 15, putative, expressed
LOC_Os05g49370	95.1484	890.68	-3.2267	1.3321e-11	1.6196e-09	DUF1645 domain containing protein, putative, expressed
LOC_Os05g49430	41.1639	113.034	-1.4573	0.0036843	0.036471	aldose 1-epimerase, putative, expressed
LOC_Os05g50310	67.8042	195.913	-1.5308	0.0047324	0.044329	ZF-HD protein dimerisation region containing protein, expressed
LOC_Os05g51190	16.918	231.258	-3.7729	2.8639e-06	9.4962e-05	protein kinase family protein, putative, expressed
LOC_Os05g51240	300.218	3001.15	-3.3214	2.1641e-08	1.2829e-06	hydrolase, alpha/beta fold family domain containing protein, expressed
LOC_Os05g51620	1223.47	6944.84	-2.505	0.0011571	0.014569	expressed protein
LOC_Os05g51630	547.872	2313.57	-2.0782	5.3016e-06	0.00016046	early-responsive to dehydration protein-related, putative, expressed
LOC_Os06g01220	30.4939	133.787	-2.1333	0.00028051	0.0046594	expressed protein
LOC_Os06g01790	934.027	2551.17	-1.4496	0.0011777	0.014765	expressed protein
LOC_Os06g01850	9410.14	22780.6	-1.2755	0.0030718	0.031543	ferredoxin--NADP reductase, chloroplast precursor, putative, expressed
LOC_Os06g01934	425.164	1208.25	-1.5068	0.00065471	0.0092802	homeobox domain containing protein, expressed
LOC_Os06g02420	246.715	709.34	-1.5236	0.00072846	0.010096	ATOZI1, putative, expressed
LOC_Os06g02500	1516.43	3795.59	-1.3236	0.0023931	0.026079	superoxide dismutase, chloroplast, putative, expressed
LOC_Os06g02630	7.35364	48.0286	-2.7074	0.00016172	0.002972	retrotransposon protein, putative, Ty3-gypsy subclass, expressed
LOC_Os06g02800	15.9197	100.664	-2.6607	0.0021318	0.023791	expressed protein
LOC_Os06g03165	51.1208	137.775	-1.4303	0.0038659	0.037838	expressed protein
LOC_Os06g03890	2.48026	55.7397	-4.4901	4.8419e-09	3.4003e-07	alpha-L-fucosidase 3 precursor, putative, expressed
LOC_Os06g03900	14.225	95.6543	-2.7494	1.5318e-06	5.4741e-05	esterase precursor, putative, expressed
LOC_Os06g04250	24.2846	147.573	-2.6033	2.2577e-05	0.00055236	phosphate-induced protein 1 conserved region domain containing protein, expressed
LOC_Os06g04370	13.6836	60.611	-2.1471	0.00047281	0.0071544	expressed protein
LOC_Os06g06210	84.8425	232.038	-1.4515	0.0021677	0.024123	expressed protein
LOC_Os06g06290	1139.78	6062.8	-2.4112	5.2495e-05	0.0011365	GDSL-like lipase/acylhydrolase, putative, expressed
LOC_Os06g06300	66.9719	564.033	-3.0742	0.0007496	0.010327	osFTL3 FT-Like3 homologous to Flowering Locus T gene; contains Pfam profile PF01161: Phosphatidylethanolamine-binding protein, expressed
LOC_Os06g06570	0.356715	14.8897	-5.3834	0.00015214	0.0028294	expressed protein
LOC_Os06g06990	63.7624	202.451	-1.6668	0.0033011	0.033408	expressed protein
LOC_Os06g07100	73.4878	208.409	-1.5038	0.0018594	0.02133	RING-H2 finger protein, putative, expressed
LOC_Os06g08154	93.521	292.342	-1.6443	0.00049961	0.0074722	receptor-like protein kinase 5 precursor, putative, expressed
LOC_Os06g08250	597.329	1897.11	-1.6672	0.00081596	0.011073	zinc finger family protein, putative, expressed
LOC_Os06g08670	2499.62	9708.76	-1.9576	9.2202e-06	0.00025971	glutathione peroxidase, putative, expressed
LOC_Os06g08830	47.1624	136.424	-1.5324	0.0018773	0.021473	UDP-glucoronosyl and UDP-glucosyl transferase, putative, expressed
LOC_Os06g08920	24.7381	93.2395	-1.9142	0.00055255	0.0080846	expressed protein
LOC_Os06g09420	27.8566	96.4838	-1.7923	0.0007749	0.010589	B3 DNA binding domain containing protein, expressed
LOC_Os06g09880	1808.64	4572.93	-1.3382	0.0024005	0.026152	EMB1270, putative, expressed
LOC_Os06g09900	3091.61	7147.43	-1.2091	0.0043201	0.041265	expressed protein
LOC_Os06g10170	6.57988	31.5688	-2.2624	0.0020849	0.023362	flavin-containing monooxygenase family protein, putative, expressed
LOC_Os06g10560	24.9343	92.2559	-1.8875	0.0047921	0.044781	leaf senescence related protein, putative, expressed
LOC_Os06g11600	50.9413	156.416	-1.6185	0.0012604	0.015611	growth regulator related protein, putative, expressed
LOC_Os06g12660	2905.59	9335.68	-1.6839	0.0001912	0.0034003	NHL repeat-containing protein, putative, expressed
LOC_Os06g12810	106.839	512.587	-2.2624	0.00094435	0.012415	proteins of unknown function domain containing protein, expressed
LOC_Os06g13060	86.6287	355.841	-2.0383	2.2428e-05	0.00055023	heat shock protein DnaJ, putative, expressed
LOC_Os06g14030	97.7266	654.119	-2.7427	5.8537e-09	4.0238e-07	potassium channel SKOR, putative, expressed
LOC_Os06g14370	17.7885	70.0902	-1.9783	0.00063869	0.0090992	caleosin related protein, putative, expressed
LOC_Os06g14530	5.83296	28.2744	-2.2772	0.0028275	0.029527	expressed protein
LOC_Os06g16150	197.952	546.328	-1.4646	0.0052247	0.047814	expressed protein
LOC_Os06g16190	2.05315	24.7126	-3.5893	9.5107e-05	0.0018908	expressed protein
LOC_Os06g17090	5.81281	44.967	-2.9516	0.0010257	0.013211	UDP-glycosyltransferase, putative, expressed
LOC_Os06g17410	788.219	2008.3	-1.3493	0.0019967	0.022536	dof zinc finger domain containing protein, putative, expressed
LOC_Os06g19380	33.6454	100.409	-1.5774	0.0032789	0.033221	expressed protein
LOC_Os06g19970	371.639	964.566	-1.376	0.0020402	0.022962	expressed protein
LOC_Os06g21210	33.546	94.3218	-1.4915	0.0038257	0.037507	glycine rich protein family protein, putative, expressed
LOC_Os06g21570	16.3807	108.37	-2.7259	1.6286e-05	0.00041792	Os6bglu24 - beta-glucosidase homologue, similar to G. max isohydroxyurate hydrolase, expressed
LOC_Os06g22060	1091.92	3398.88	-1.6382	0.0043718	0.041639	pyrophosphate--fructose 6-phosphate 1-phosphotransferase subunit alpha, putative, expressed
LOC_Os06g22810	127.456	504.952	-1.9861	0.00025637	0.0043411	TKL_IRAK_CrRLK1L-1.14 - The CrRLK1L-1 subfamily has homology to the CrRLK1L homolog, expressed
LOC_Os06g24070	1061.53	6389.95	-2.5897	0.0024154	0.026275	myb-like DNA-binding domain containing protein, expressed
LOC_Os06g24540	90.2756	443.739	-2.2973	1.1657e-06	4.3675e-05	expressed protein
LOC_Os06g28124	91.0673	1133.04	-3.6371	0.0018962	0.021655	glycosyltransferase, putative, expressed
LOC_Os06g28144	248.828	802.116	-1.6887	0.00020274	0.0035683	expressed protein
LOC_Os06g28194	6291.6	32148.4	-2.3532	1.259e-06	4.6443e-05	expressed protein
LOC_Os06g30930	66.1859	200.553	-1.5994	0.0011552	0.01455	expressed protein
LOC_Os06g31190	16.0652	69.2277	-2.1074	0.00030949	0.0050608	intracellular protein transport protein USO1-related, putative, expressed
LOC_Os06g32870	26.9855	253.003	-3.2289	0.00070448	0.0098404	retrotransposon protein, putative, Ty3-gypsy subclass, expressed
LOC_Os06g32880	24.489	462.773	-4.2401	1.3501e-06	4.9294e-05	retrotransposon protein, putative, Ty3-gypsy subclass, expressed
LOC_Os06g32890	105.698	1667.5	-3.9797	0.0011435	0.014448	retrotransposon protein, putative, Ty3-gypsy subclass, expressed
LOC_Os06g32910	90.1727	835.615	-3.2121	0.00063266	0.0090422	uncharacterized Cys-rich domain containing protein, putative, expressed
LOC_Os06g33200	625.533	1545.8	-1.3052	0.0029649	0.030675	expressed protein
LOC_Os06g33549	183.286	475.51	-1.3754	0.0024517	0.026605	protein phosphatase 2C, putative, expressed
LOC_Os06g33700	0.313144	11.7985	-5.2356	0.0011718	0.014702	expressed protein
LOC_Os06g33720	43.0001	142.507	-1.7286	0.00080793	0.011006	flavin-containing monooxygenase family protein, putative, expressed
LOC_Os06g34120	5.92677	36.9707	-2.6411	0.00024898	0.0042239	GDSL-like lipase/acylhydrolase, putative, expressed
LOC_Os06g35165	302.831	1591.82	-2.3941	0.0005564	0.0081276	expressed protein
LOC_Os06g35200	287.946	751.491	-1.384	0.0024086	0.026216	receptor-like kinase, putative, expressed
LOC_Os06g36040	308.352	1048.96	-1.7663	5.825e-05	0.0012394	expressed protein
LOC_Os06g36070	109.213	358.637	-1.7154	0.00037845	0.0059858	expressed protein
LOC_Os06g37330	0.713431	20.5296	-4.8468	0.00073055	0.010118	cytochrome P450, putative, expressed
LOC_Os06g37364	322.848	790.848	-1.2925	0.0049626	0.045974	cytochrome P450, putative, expressed
LOC_Os06g38350	233.94	627.787	-1.4241	0.0015838	0.018821	expressed protein
LOC_Os06g39080	3.20184	52.4292	-4.0334	1.0071e-07	5.1135e-06	UDP-glucoronosyl and UDP-glucosyl transferase domain containing protein, expressed
LOC_Os06g39370	816.651	2187.16	-1.4213	0.001016	0.013126	OsFBK16 - F-box domain and kelch repeat containing protein, expressed
LOC_Os06g40170	13.3757	60.1589	-2.1692	0.00037815	0.0059856	phospholipase D, putative, expressed
LOC_Os06g40180	148.058	636.02	-2.1029	1.1483e-05	0.00031071	phospholipase D, putative, expressed
LOC_Os06g40430	215.023	985.149	-2.1958	1.8934e-05	0.00047594	expressed protein
LOC_Os06g40440	4801.58	20784.9	-2.114	2.9882e-06	9.8355e-05	expressed protein
LOC_Os06g40640	5013.75	15523.4	-1.6305	0.00019273	0.0034257	fructose-bisphospate aldolase isozyme, putative, expressed
LOC_Os06g40940	30549	70262.3	-1.2016	0.0054066	0.048995	glycine dehydrogenase, putative, expressed
LOC_Os06g41020	329.851	1558.09	-2.2399	7.9645e-07	3.1561e-05	DUF1680 domain containing protein, putative, expressed
LOC_Os06g41720	96.0846	242.132	-1.3334	0.0055537	0.049967	expressed protein
LOC_Os06g42220	0	14.3378	#NAME?	0.0050184	0.046352	TOO MANY MOUTHS precursor, putative, expressed
LOC_Os06g42850	1892.01	5935.67	-1.6495	0.00018315	0.0032882	extracellular ligand-gated ion channel, putative, expressed
LOC_Os06g43180	69.502	246.264	-1.8251	0.00014618	0.0027329	cyclase family protein, putative, expressed
LOC_Os06g43620	95.284	302.842	-1.6683	0.00041369	0.0064434	haemolysin-III, putative, expressed
LOC_Os06g43660	5526.63	13944.4	-1.3352	0.0026638	0.028255	inorganic H+ pyrophosphatase, putative, expressed
LOC_Os06g44460	234.455	591.742	-1.3357	0.0035348	0.035247	D-3-phosphoglycerate dehydrogenase, chloroplast precursor, putative, expressed
LOC_Os06g44540	149.315	664.235	-2.1533	3.8616e-06	0.0001227	HOTHEAD precursor, putative, expressed
LOC_Os06g44610	122.358	382.422	-1.6441	0.00027521	0.0045968	membrane associated DUF588 domain containing protein, putative, expressed
LOC_Os06g44840	548.045	1360.1	-1.3113	0.0028271	0.029527	prenyltransferase, putative, expressed
LOC_Os06g45480	1477.77	3761.9	-1.348	0.0023303	0.025567	hydrolase, putative, expressed
LOC_Os06g45710	249.901	733.526	-1.5535	0.00066255	0.0093497	phosphoglycerate kinase protein, putative, expressed
LOC_Os06g46436	4.08288	22.7853	-2.4804	0.0031896	0.032529	photosystem I iron-sulfur center, putative, expressed
LOC_Os06g46460	382.034	1511.86	-1.9845	9.7754e-06	0.00027256	expressed protein
LOC_Os06g46940	56.1277	540.806	-3.2683	1.8752e-11	2.2049e-09	Os6bglu25 - beta-glucosidase homologue, similar to Os3bglu6, expressed
LOC_Os06g47220	91.1863	474.068	-2.3782	0.0014227	0.017251	expressed protein
LOC_Os06g47820	5.94352	40.1457	-2.7559	9.5004e-05	0.0018898	protein kinase domain containing protein, expressed
LOC_Os06g48560	252.656	1490.93	-2.561	8.4782e-06	0.00024128	transferase family protein, putative, expressed
LOC_Os06g48800	50.8703	149.648	-1.5567	0.0015322	0.018287	OsHKT2;4 - Na+ transporter, expressed
LOC_Os06g49010	102.781	416.203	-2.0177	0.0050378	0.046495	OsSPL12 - SBP-box gene family member, expressed
LOC_Os06g49210	58.0986	348.697	-2.5854	5.8609e-06	0.00017487	retrotransposon protein, putative, unclassified, expressed
LOC_Os06g49830	4.53681	38.5536	-3.0871	0.0026668	0.028261	SHI, putative, expressed
LOC_Os06g50370	162.058	393.69	-1.2806	0.0047521	0.044467	zinc finger, C3HC4 type, domain containing protein, expressed
LOC_Os06g51270	548.508	1678.5	-1.6136	0.00026083	0.0043978	1,3-beta-glucan synthase component domain containing protein, expressed
LOC_Os06g51460	696.105	1894.1	-1.4441	0.0010503	0.013466	white-brown complex homolog protein, putative, expressed
LOC_Os06g51520	110.977	308.122	-1.4732	0.0017679	0.020485	lysine ketoglutarate reductase trans-splicing related 1, putative, expressed
LOC_Os07g01214	307.269	1495.99	-2.2835	2.2591e-06	7.6906e-05	transposon protein, putative, unclassified, expressed
LOC_Os07g01710	26.1368	80.6291	-1.6252	0.0032259	0.032777	phytosulfokine receptor precursor, putative, expressed
LOC_Os07g01810	7.04864	34.4814	-2.2904	0.0016359	0.019292	potassium channel protein, putative, expressed
LOC_Os07g01860	13.2216	62.5246	-2.2415	0.00020887	0.003658	expressed protein
LOC_Os07g02440	18.284	108.822	-2.5733	4.1593e-06	0.00013072	peroxidase precursor, putative, expressed
LOC_Os07g02460	841.57	2381.33	-1.5006	0.00073247	0.01014	expressed protein
LOC_Os07g02540	162.995	866.036	-2.4096	3.0462e-07	1.3419e-05	HLS, putative, expressed
LOC_Os07g02550	2.67276	20.3789	-2.9307	0.0018694	0.021418	expressed protein
LOC_Os07g03880	304.568	699.226	-1.199	0.0055532	0.049967	lectin-like receptor kinase, putative, expressed
LOC_Os07g04480	28.1399	107.455	-1.933	0.0025642	0.027508	transposon protein, putative, unclassified, expressed
LOC_Os07g05174	20.4363	64.4309	-1.6566	0.0040569	0.039236	expressed protein
LOC_Os07g05360	4411.88	106070	-4.5875	0.0046027	0.043364	photosystem II 10 kDa polypeptide, chloroplast precursor, putative, expressed
LOC_Os07g05570	531.515	1358.57	-1.3539	0.0030324	0.031247	ERD4 protein, putative, expressed
LOC_Os07g06860	36.4368	209.634	-2.5244	7.8495e-06	0.00022646	gibberellin receptor GID1L2, putative, expressed
LOC_Os07g07050	1336.59	3239.09	-1.277	0.0031169	0.031933	aldehyde oxidase, putative, expressed
LOC_Os07g07150	62.6657	198.359	-1.6624	0.0022733	0.025049	expressed protein
LOC_Os07g07646	118.729	312.149	-1.3946	0.0026226	0.027934	expressed protein
LOC_Os07g08290	1120.34	4036.35	-1.8491	3.5599e-05	0.00081884	expressed protein
LOC_Os07g08460	127.742	670.437	-2.3919	2.1486e-05	0.00053076	OsIAA24 - Auxin-responsive Aux/IAA gene family member, expressed
LOC_Os07g09040	918.549	2575.35	-1.4873	0.00071483	0.0099501	peptidyl-prolyl cis-trans isomerase, FKBP-type, putative, expressed
LOC_Os07g09800	1491.66	3775.77	-1.3399	0.002704	0.02852	expressed protein
LOC_Os07g10770	103.595	385.498	-1.8958	5.9588e-05	0.0012648	CESA8 - cellulose synthase, expressed
LOC_Os07g11020	1.78358	20.3137	-3.5096	0.00033384	0.0053971	rc - bHLH transcription factor regulating proanthocyanidin production in seeds, expressed
LOC_Os07g13090	4.41617	29.8336	-2.7561	0.0020416	0.022971	expressed protein
LOC_Os07g13100	57.6062	477.297	-3.0506	1.3823e-06	5.0368e-05	DNA binding protein, putative, expressed
LOC_Os07g13234	4307.14	10269.6	-1.2536	0.0045962	0.043348	expressed protein
LOC_Os07g13660	7.72857	45.9531	-2.5719	0.00015507	0.0028739	UDP-glucoronosyl and UDP-glucosyl transferase domain containing protein, expressed
LOC_Os07g13770	198.132	607.819	-1.6172	0.00036007	0.0057459	UDP-glucoronosyl and UDP-glucosyl transferase domain containing protein, expressed
LOC_Os07g13790	1.67969	18.2136	-3.4388	0.00091312	0.012084	hypothetical protein
LOC_Os07g17390	126.924	314.043	-1.307	0.0051779	0.047469	PsbP, putative, expressed
LOC_Os07g17970	122.99	455.435	-1.8887	0.0007216	0.010025	AMP-binding domain containing protein, expressed
LOC_Os07g23110	248.376	599.25	-1.2706	0.0053292	0.048496	poly synthetase 1, putative, expressed
LOC_Os07g23120	713.758	4277.34	-2.5832	0.0033205	0.033528	expressed protein
LOC_Os07g23210	46.9414	155.512	-1.7281	0.00055128	0.0080747	transposon protein, putative, unclassified, expressed
LOC_Os07g23810	434.076	1312.51	-1.5963	0.0003807	0.0060186	expressed protein
LOC_Os07g24230	29.0905	99.9203	-1.7802	0.0008813	0.011768	integral membrane transporter family protein, putative, expressed
LOC_Os07g25540	3.01941	68.5752	-4.5054	3.0614e-05	0.00071994	flavin monooxygenase, putative, expressed
LOC_Os07g26560	15.7503	67.5162	-2.0999	0.00040485	0.0063415	expressed protein
LOC_Os07g28480	1645.41	4553.78	-1.4686	0.0019368	0.021985	glutathione S-transferase, putative, expressed
LOC_Os07g28614	712.821	1945.26	-1.4484	0.004803	0.044838	expressed protein
LOC_Os07g30670	1483.06	4074.31	-1.458	0.00090126	0.011958	2Fe-2S iron-sulfur cluster binding domain containing protein, expressed
LOC_Os07g30810	28.8027	109.582	-1.9277	0.0004023	0.0063043	nucleobase-ascorbate transporter, putative, expressed
LOC_Os07g33120	1.41011	17.0938	-3.5996	0.0007592	0.010417	expressed protein
LOC_Os07g33560	9.56919	51.6421	-2.4321	0.00017532	0.0031682	cytochrome P450, putative, expressed
LOC_Os07g34830	267.719	937.703	-1.8084	5.4341e-05	0.0011698	ankyrin repeat family protein, putative, expressed
LOC_Os07g34870	32.7874	129.212	-1.9785	0.0054528	0.049282	aspartic proteinase nepenthesin precursor, putative, expressed
LOC_Os07g35020	19.396	76.2082	-1.9742	0.00049252	0.0074026	expressed protein
LOC_Os07g35985	257.149	670.465	-1.3826	0.0025827	0.02769	expressed protein
LOC_Os07g36230	60.8456	183.538	-1.5929	0.0012457	0.015455	BTBN15 - Bric-a-Brac, Tramtrack, Broad Complex BTB domain with non-phototropic hypocotyl 3 NPH3 and coiled-coil domains, expressed
LOC_Os07g36760	17.8322	59.138	-1.7296	0.00301	0.031065	retrotransposon protein, putative, Ty3-gypsy subclass, expressed
LOC_Os07g36770	104.487	269.985	-1.3696	0.0035432	0.035298	retrotransposon protein, putative, Ty3-gypsy subclass, expressed
LOC_Os07g37156	16.0044	57.1008	-1.835	0.003041	0.03129	expressed protein
LOC_Os07g37250	3790.89	9635.17	-1.3458	0.0022649	0.024992	THYLAKOID FORMATION1, chloroplast precursor, putative, expressed
LOC_Os07g37310	146.927	641.908	-2.1273	4.2675e-06	0.00013346	uncharacterized secreted protein, putative, expressed
LOC_Os07g38660	0	11.3355	#NAME?	0.00029512	0.0048659	ubiquitin-like protein SMT3, putative, expressed
LOC_Os07g38790	98.6467	550.291	-2.4799	1.1781e-05	0.00031615	beta-hexosaminidase precursor, putative, expressed
LOC_Os07g39590	750.186	2117.1	-1.4968	0.0038191	0.037473	spotted leaf 11, putative, expressed
LOC_Os07g40150	8.64311	46.2951	-2.4212	0.00027551	0.0045998	expressed protein
LOC_Os07g40480	26.8668	108.047	-2.0078	0.00017602	0.0031776	zinc finger family protein, putative, expressed
LOC_Os07g41080	655.947	1640.94	-1.3229	0.003411	0.03423	hydrolase, alpha/beta fold family domain containing protein, expressed
LOC_Os07g41370	908.575	2142.99	-1.2379	0.0048102	0.044881	OsMADS18 - MADS-box family gene with MIKCc type-box, expressed
LOC_Os07g42420	84.6752	255.734	-1.5946	0.00093252	0.012282	3-oxoacyl-synthase, putative, expressed
LOC_Os07g42700	298.578	734.944	-1.2995	0.004801	0.044831	paramyosin, putative, expressed
LOC_Os07g42770	674.283	1817.49	-1.4305	0.0011929	0.014941	CAMK_CAMK_like.35 - CAMK includes calcium/calmodulin depedent protein kinases, expressed
LOC_Os07g42994	3.6122	24.0744	-2.7366	0.0017053	0.01994	hydrolase, putative, expressed
LOC_Os07g43350	82.2579	226.642	-1.4622	0.0049487	0.045874	expressed protein
LOC_Os07g43370	413.557	1101.21	-1.4129	0.0014057	0.017096	amine oxidase family protein, putative, expressed
LOC_Os07g43560	10253	32152.3	-1.6489	0.00016499	0.0030166	TKL_IRAK_DUF26-lc.24 - DUF26 kinases have homology to DUF26 containing loci, expressed
LOC_Os07g46460	25098.7	59619.9	-1.2482	0.0039857	0.038735	ferredoxin-dependent glutamate synthase, chloroplast precursor, putative, expressed
LOC_Os07g46490	6.51617	156.956	-4.5902	0.0015565	0.018546	phosphatidylinositol-4-phosphate 5-kinase, putative, expressed
LOC_Os07g46790	2302.28	5701.72	-1.3083	0.0043457	0.041424	4-alpha-glucanotransferase, putative, expressed
LOC_Os07g47100	87.4385	280.087	-1.6795	0.00036908	0.0058686	transporter, monovalent cation:proton antiporter-2 family, putative, expressed
LOC_Os07g47430	13.2752	59.7212	-2.1695	0.00083524	0.011272	expressed protein
LOC_Os07g47450	1315.12	4071.18	-1.6303	0.00021049	0.0036828	flowering promoting factor-like 1, putative, expressed
LOC_Os07g47700	73.1623	901.857	-3.6237	1.2836e-06	4.7204e-05	NAD dependent epimerase/dehydratase family domain containing protein, expressed
LOC_Os07g47970	30.478	86.5627	-1.506	0.0041201	0.039707	expressed protein
LOC_Os07g48520	439.054	1841.6	-2.0685	0.0034099	0.03423	gamete-specific hydroxyproline-rich glycoprotein a2, putative, expressed
LOC_Os07g48690	335.354	839.026	-1.323	0.0029125	0.030211	DUF630/DUF632 domains containing protein, putative, expressed
LOC_Os07g49110	2534.06	7019.75	-1.47	0.0008191	0.011105	D-alanine--D-alanine ligase family, putative, expressed
LOC_Os08g01030	18.49	63.6005	-1.7823	0.0024606	0.026645	metal cation transporter, putative, expressed
LOC_Os08g02300	21.2335	132.864	-2.6455	0.00024379	0.0041655	no apical meristem protein, putative, expressed
LOC_Os08g02370	45.75	122.92	-1.4259	0.0053718	0.04881	galactosyltransferase family protein, putative, expressed
LOC_Os08g02630	14333.2	33365.7	-1.219	0.0055433	0.049911	photosystem II core complex proteins psbY, chloroplast precursor, putative, expressed
LOC_Os08g03430	397.695	960.309	-1.2718	0.0036881	0.036488	extracellular ligand-gated ion channel, putative, expressed
LOC_Os08g04460	102.98	336.772	-1.7094	0.00019699	0.0034809	NADPH-dependent FMN reductase domain containing protein, expressed
LOC_Os08g04580	0.696682	67.6541	-6.6015	2.7287e-13	4.6008e-11	csAtPR5, putative, expressed
LOC_Os08g06280	991.011	3368.82	-1.7653	0.00097088	0.01268	LSD1 zinc finger domain containing protein, expressed
LOC_Os08g07740	39.7298	120.397	-1.5995	0.0016833	0.019734	histone-like transcription factor and archaeal histone, putative, expressed
LOC_Os08g08140	52.257	151.843	-1.5389	0.002904	0.03014	receptor-like kinase, putative, expressed
LOC_Os08g09930	285.906	703.832	-1.2997	0.0038376	0.037613	expressed protein
LOC_Os08g10080	77.0232	2634.25	-5.096	0.0021676	0.024123	no apical meristem protein, putative, expressed
LOC_Os08g10244	346.352	1757.18	-2.3429	0.00052084	0.0077123	retrotransposon protein, putative, unclassified, expressed
LOC_Os08g10250	327.426	1247.75	-1.9301	0.0010693	0.013651	SHR5-receptor-like kinase, putative, expressed
LOC_Os08g10440	11.8095	66.9516	-2.5032	5.797e-05	0.0012349	NBS-LRR disease resistance protein, putative, expressed
LOC_Os08g10612	0.66986	80.9077	-6.9163	7.6687e-15	1.7349e-12	expressed protein
LOC_Os08g11480	600.992	1710.1	-1.5087	0.00057359	0.0083244	expressed protein
LOC_Os08g13630	543.148	1408.68	-1.3749	0.0020613	0.023141	expressed protein
LOC_Os08g14440	5038.35	12619.5	-1.3246	0.0022092	0.024479	uridylyltransferase-related, putative, expressed
LOC_Os08g14940	409.794	5867.31	-3.8397	1.1336e-15	3.1657e-13	receptor kinase, putative, expressed
LOC_Os08g14950	56.6753	280.005	-2.3047	2.9059e-06	9.6089e-05	receptor-like protein kinase 2 precursor, putative, expressed
LOC_Os08g15030	290.063	1716.59	-2.5651	1.8409e-08	1.1172e-06	aspartate carbamoyltransferase, putative, expressed
LOC_Os08g15060	11.5065	162.348	-3.8186	0.0015269	0.018272	ATP binding protein, putative, expressed
LOC_Os08g15246	21.3433	86.3266	-2.016	0.00042889	0.0066423	chloroplast 30S ribosomal protein S7, putative, expressed
LOC_Os08g16810	51.5166	163.023	-1.662	0.00080848	0.011006	retrotransposon protein, putative, SINE subclass, expressed
LOC_Os08g16830	14.4574	81.9918	-2.5037	1.9008e-05	0.00047746	retrotransposon protein, putative, SINE subclass, expressed
LOC_Os08g17655	115.108	294.155	-1.3536	0.004321	0.041265	expressed protein
LOC_Os08g23140	234.767	587.639	-1.3237	0.0041287	0.039778	expressed protein
LOC_Os08g23410	1829.98	4478.23	-1.2911	0.002993	0.030903	rubredoxin family protein, putative, expressed
LOC_Os08g24330	28.9584	92.3725	-1.6735	0.0017091	0.019978	transposon protein, putative, CACTA, En/Spm sub-class, expressed
LOC_Os08g25830	9.70986	110.233	-3.505	0.0013332	0.016371	expressed protein
LOC_Os08g26710	97.157	517.491	-2.4131	1.524e-07	7.3616e-06	plant protein of unknown function domain containing protein, expressed
LOC_Os08g26980	1.73333	33.3343	-4.2654	0.00051458	0.0076418	expressed protein
LOC_Os08g28870	35.0723	197.391	-2.4926	0.0036662	0.036345	receptor-like protein kinase 5 precursor, putative, expressed
LOC_Os08g29160	1040.67	2621.65	-1.333	0.0030293	0.031224	5-AMP-activated protein kinase beta-1 subunit-related, putative, expressed
LOC_Os08g29370	823.028	2009.39	-1.2877	0.003013	0.031073	peptidyl-prolyl cis-trans isomerase, chloroplast precursor, putative, expressed
LOC_Os08g29980	5.64045	109.813	-4.2831	0.0045748	0.043284	retrotransposon protein, putative, unclassified, expressed
LOC_Os08g30014	18.132	623.589	-5.104	7.9912e-06	0.00023015	expressed protein
LOC_Os08g30370	273.273	681.895	-1.3192	0.0035845	0.035621	expressed protein
LOC_Os08g30910	54.3944	407.538	-2.9054	2.2884e-09	1.7113e-07	YDG/SRA domain containing protein, expressed
LOC_Os08g31510	6989.51	17098.6	-1.2906	0.0038068	0.037404	DUF581 domain containing protein, expressed
LOC_Os08g31630	608.386	2153.82	-1.8238	0.001842	0.021178	uncharacterized glycosyl hydrolase Rv2006/MT2062, putative, expressed
LOC_Os08g33740	122.398	299.822	-1.2925	0.0044595	0.042339	CSLA11 - cellulose synthase-like family A, expressed
LOC_Os08g34984	1539.16	7420.31	-2.2693	0.00023816	0.0040927	DUF581 domain containing protein, expressed
LOC_Os08g36680	25.2192	138.326	-2.4555	0.0034403	0.034437	bifunctional monodehydroascorbate reductase and carbonic anhydrasenectarin-3 precursor, putative, expressed
LOC_Os08g36860	661.413	1893.53	-1.5175	0.00051353	0.0076324	cytochrome P450, putative, expressed
LOC_Os08g37030	8.29307	43.1125	-2.3781	0.00037827	0.0059856	gibberellin receptor GID1L2, putative, expressed
LOC_Os08g37570	13.1789	68.73	-2.3827	0.00092843	0.012246	spotted leaf 11, putative, expressed
LOC_Os08g37940	472.604	1266.44	-1.4221	0.0012682	0.01568	HAD-superfamily hydrolase subfamily IA, variant 3, putative, expressed
LOC_Os08g38300	224.5	569.969	-1.3442	0.0028892	0.030006	Core histone H2A/H2B/H3/H4 domain containing protein, putative, expressed
LOC_Os08g38850	19.7363	264.247	-3.743	6.9804e-06	0.00020335	phosphatidylinositol transfer, putative, expressed
LOC_Os08g38990	14.2563	88.5088	-2.6342	0.0026444	0.028112	WRKY30, expressed
LOC_Os08g39300	49409	123499	-1.3216	0.0026191	0.02793	aminotransferase, putative, expressed
LOC_Os08g39430	1033.83	3098.73	-1.5837	0.00027456	0.0045882	thylakoid lumenal 19 kDa protein, chloroplast precursor, putative, expressed
LOC_Os08g39490	78.7849	233.591	-1.568	0.0010486	0.013459	expressed protein
LOC_Os08g39860	67.7146	222.448	-1.7159	0.0035351	0.035247	Os8bglu27 - beta-glucosidase homologue, similar to Os4bglu12 exoglucanase, expressed
LOC_Os08g40420	55.6343	161.03	-1.5333	0.0019315	0.021945	ternary complex factor MIP1, putative, expressed
LOC_Os08g41320	31.7633	111.175	-1.8074	0.00075603	0.010382	BHLH transcription factor, putative, expressed
LOC_Os08g41400	58.5549	600.626	-3.3586	1.0869e-06	4.1112e-05	expressed protein
LOC_Os08g41620	9.29282	40.7104	-2.1312	0.0053564	0.048681	ubiquitin carboxyl-terminal hydrolase family protein, expressed
LOC_Os08g41630	65.977	318.168	-2.2698	0.0019226	0.021866	ubiquitin carboxyl-terminal hydrolase family protein, expressed
LOC_Os08g42100	2795.46	6969.45	-1.318	0.0054305	0.049168	ACT domain containing protein, expressed
LOC_Os08g42530	118.949	400.832	-1.7527	0.00023777	0.004088	SFC, putative, expressed
LOC_Os08g42620	2.35962	22.8657	-3.2766	0.00041029	0.0064039	zinc finger DHHC domain-containing protein, putative, expressed
LOC_Os08g42700	24.4015	322.263	-3.7232	0.0037101	0.036655	resistance protein, putative, expressed
LOC_Os08g43320	415.811	1326.79	-1.6739	0.00021091	0.0036884	OsRhmbd14 - Putative Rhomboid homologue, expressed
LOC_Os08g43390	173.48	2473.41	-3.8337	0.0048159	0.044911	cytochrome P450, putative, expressed
LOC_Os08g43400	36.1315	252.659	-2.8059	1.1314e-05	0.0003066	kinesin motor domain containing protein, expressed
LOC_Os08g44760	72.1075	238.962	-1.7286	0.00040836	0.0063825	domain of unknown function DUF966 domain containing protein, expressed
LOC_Os08g45170	2.43669	18.4541	-2.9209	0.0025456	0.02735	carboxyl-terminal peptidase, putative, expressed
LOC_Os09g02360	14.4089	90.5266	-2.6514	4.0847e-06	0.00012887	cyclin, putative, expressed
LOC_Os09g02650	311.047	1184.64	-1.9292	2.4592e-05	0.00059595	kinesin motor domain containing protein, putative, expressed
LOC_Os09g03380	5.12427	64.4352	-3.6524	2.1037e-07	9.728e-06	transposon protein, putative, Mutator sub-class, expressed
LOC_Os09g03630	359.707	920.695	-1.3559	0.002501	0.026976	ankyrin, putative, expressed
LOC_Os09g09330	87.8244	286.789	-1.7073	0.00039675	0.0062255	expressed protein
LOC_Os09g11480	1629.6	5078.88	-1.64	0.0013076	0.016095	AP2 domain containing protein, expressed
LOC_Os09g11890	475.326	1227.94	-1.3692	0.0022204	0.024572	expressed protein
LOC_Os09g12300	444.056	1208.19	-1.444	0.0045955	0.043348	serine/threonine-protein kinase NAK, putative, expressed
LOC_Os09g16280	45.6106	163.937	-1.8457	0.00018863	0.0033662	hydroxyproline-rich glycoprotein family protein, putative, expressed
LOC_Os09g17610	35.2568	99.2695	-1.4934	0.005144	0.04722	RING finger protein, putative, expressed
LOC_Os09g18040	0	28.2144	#NAME?	0.0020926	0.023434	senescence-induced receptor-like serine/threonine-protein kinase precursor, putative
LOC_Os09g18050	0.339967	38.4174	-6.8202	0.0012047	0.015041	expressed protein
LOC_Os09g19390	1652.64	4771.34	-1.5296	0.0053823	0.048855	senescence-induced receptor-like serine/threonine-protein kinase precursor, putative, expressed
LOC_Os09g19500	16.4089	706.045	-5.4272	5.5329e-20	3.2962e-17	senescence-induced receptor-like serine/threonine-protein kinase precursor, putative, expressed
LOC_Os09g19510	6.06416	840.601	-7.115	4.4645e-19	2.2287e-16	senescence-induced receptor-like serine/threonine-protein kinase precursor, putative, expressed
LOC_Os09g20240	1243.71	4087.86	-1.7167	0.00012478	0.0023916	DUF581 domain containing protein, expressed
LOC_Os09g20980	3.92387	55.0871	-3.8114	0.0026646	0.028255	RING-H2 finger protein, putative, expressed
LOC_Os09g22000	3.04623	29.1386	-3.2578	0.0001031	0.0020315	hydrolase, HAD superfamily, Cof family, putative, expressed
LOC_Os09g23820	4.89012	26.59	-2.4429	0.0017378	0.020253	cytochrome P450 72A1, putative, expressed
LOC_Os09g24800	31.6148	87.7799	-1.4733	0.0053872	0.048862	MYB family transcription factor, putative, expressed
LOC_Os09g24820	1425.57	4100.78	-1.5244	0.00055233	0.0080846	ZF-HD protein dimerisation region containing protein, expressed
LOC_Os09g26300	2.64594	26.6425	-3.3319	0.00015776	0.0029144	hypro1, putative, expressed
LOC_Os09g26370	627.95	3727.45	-2.5695	0.00066243	0.0093497	DUF581 domain containing protein, expressed
LOC_Os09g26420	2197.14	7887.28	-1.8439	2.894e-05	0.00068508	AP2 domain containing protein, expressed
LOC_Os09g26810	2011.95	5035.66	-1.3236	0.002378	0.025955	chlorophyll A-B binding protein, putative, expressed
LOC_Os09g27320	7.79897	39.9045	-2.3552	0.0006409	0.0091271	ZOS9-13 - C2H2 zinc finger protein, expressed
LOC_Os09g27540	91.1307	249.463	-1.4528	0.00229	0.025202	C2 domain containing protein, expressed
LOC_Os09g27820	2.77665	99.836	-5.1681	0.0016092	0.019022	1-aminocyclopropane-1-carboxylate oxidase protein, putative, expressed
LOC_Os09g27940	127.375	391.541	-1.6201	0.00050917	0.0075778	aspartic proteinase nepenthesin-1 precursor, putative, expressed
LOC_Os09g28630	1388.47	3853.33	-1.4726	0.00097234	0.012689	gibberellin receptor, putative, expressed
LOC_Os09g28770	46.9759	149.585	-1.671	0.001058	0.013541	patatin, putative, expressed
LOC_Os09g30270	14.9515	130.299	-3.1235	9.8522e-07	3.7898e-05	transposon protein, putative, Mutator sub-class, expressed
LOC_Os09g30510	34.6184	134.279	-1.9556	0.00019417	0.0034416	glucosyl transferase, putative, expressed
LOC_Os09g31220	365.196	998.648	-1.4513	0.0011002	0.01397	expressed protein
LOC_Os09g31230	5.39577	43.947	-3.0259	0.00023772	0.004088	expressed protein
LOC_Os09g33460	5.26699	27.4407	-2.3813	0.0019167	0.02184	double-stranded RNA binding motif containing protein, expressed
LOC_Os09g34270	3.46326	39.4677	-3.5105	4.8058e-06	0.00014783	UDP-glucoronosyl and UDP-glucosyl transferase domain containing protein, expressed
LOC_Os09g34950	27.6388	88.3418	-1.6764	0.0019623	0.022209	TCP family transcription factor, putative, expressed
LOC_Os09g35940	1036.13	10239	-3.3048	2.0127e-12	2.8663e-10	cytochrome P450, putative, expressed
LOC_Os09g36240	808.508	2302.05	-1.5096	0.001011	0.013075	deoxyribodipyrimidine photolyase family protein, expressed
LOC_Os09g36510	38.899	151.255	-1.9592	0.0032183	0.032728	expressed protein
LOC_Os09g36520	694.117	2037.2	-1.5533	0.0032705	0.033146	ki1 protein, putative, expressed
LOC_Os09g36580	296.239	1218.81	-2.0406	2.1718e-05	0.00053575	thaumatin, putative, expressed
LOC_Os09g36930	17723.5	59951.9	-1.7581	6.699e-05	0.0013971	aquaporin protein, putative, expressed
LOC_Os09g37620	902.199	3209.66	-1.8309	4.0174e-05	0.000906	flavin-containing monooxygenase family protein, putative, expressed
LOC_Os09g37710	485.118	1334.38	-1.4598	0.0012215	0.015202	NIN, putative, expressed
LOC_Os09g37910	569.107	1658.48	-1.5431	0.0035638	0.035494	HMG1/2, putative, expressed
LOC_Os09g38320	184.121	795.961	-2.112	0.00069933	0.00978	phytoene synthase, chloroplast precursor, putative, expressed
LOC_Os09g38440	2.49701	17.8742	-2.8396	0.0029828	0.030823	ATXR, putative, expressed
LOC_Os09g38510	44.5596	218.291	-2.2924	0.00036167	0.0057689	purine permease, putative, expressed
LOC_Os09g38777	357.909	894.025	-1.3207	0.0033807	0.033992	MOSC domain-containing protein, mitochondrial precursor, putative, expressed
LOC_Os10g01680	1.72326	25.1934	-3.8698	4.435e-05	0.00098038	transferase family protein, putative, expressed
LOC_Os10g02220	269.849	890.744	-1.7229	0.00012953	0.0024693	peptide transporter PTR2, putative, expressed
LOC_Os10g02690	52.4551	173.015	-1.7217	0.0017014	0.019913	expressed protein
LOC_Os10g05290	62.3757	180.288	-1.5313	0.001747	0.020334	tRNA/rRNA methyltransferase, putative, expressed
LOC_Os10g05780	105.877	792.447	-2.9039	3.842e-07	1.6427e-05	POT domain containing peptide transporter, putative, expressed
LOC_Os10g08010	47.5314	196.633	-2.0485	2.7289e-05	0.00064985	expressed protein
LOC_Os10g08014	52.3632	208.056	-1.9903	0.00048078	0.0072513	white-brown complex homolog protein 11, putative, expressed
LOC_Os10g08474	125.603	1032.41	-3.0391	0.0025634	0.027508	cytochrome P450, putative, expressed
LOC_Os10g08754	9.97615	37.7249	-1.919	0.0045957	0.043348	expressed protein
LOC_Os10g09850	105.652	308.51	-1.546	0.00081291	0.01104	EF hand family protein, putative, expressed
LOC_Os10g10149	2.09672	22.0337	-3.3935	0.0053355	0.048541	expressed protein
LOC_Os10g10170	3521.96	9508.9	-1.4329	0.0011679	0.014673	PPR repeat domain containing protein, putative, expressed
LOC_Os10g11140	1299.45	3342.97	-1.3632	0.0037098	0.036655	phosphoglucomutase, putative, expressed
LOC_Os10g13694	947.487	2269.55	-1.2602	0.0048854	0.04544	expressed protein
LOC_Os10g18480	1.0534	220.565	-7.71	5.4825e-05	0.0011763	glucosyltransferase, putative, expressed
LOC_Os10g18490	28.4125	1054.14	-5.2134	0.00024557	0.004186	cytokinin-O-glucosyltransferase 2, putative, expressed
LOC_Os10g20890	0	10.9233	#NAME?	0.00037815	0.0059856	LTPL137 - Protease inhibitor/seed storage/LTP family protein precursor, expressed
LOC_Os10g21212	49.0688	140.757	-1.5203	0.0026221	0.027934	photosystem II 44 kDa reaction center protein, putative, expressed
LOC_Os10g21314	13.3389	48.1496	-1.8519	0.0029166	0.030245	chloroplast 50S ribosomal protein L20, putative, expressed
LOC_Os10g23180	1141.79	3858.42	-1.7567	0.0050063	0.046276	cytochrome P450, putative, expressed
LOC_Os10g25090	6.63013	69.6416	-3.3928	0.00011573	0.0022495	STRUBBELIG-RECEPTOR FAMILY 6 precursor, putative, expressed
LOC_Os10g25760	8.12693	117.29	-3.8512	7.5887e-06	0.00021964	transposon protein, putative, CACTA, En/Spm sub-class, expressed
LOC_Os10g26510	2.45344	18.7275	-2.9323	0.0022366	0.024729	expressed protein
LOC_Os10g26670	21.2566	64.2743	-1.5963	0.0053105	0.048363	expressed protein
LOC_Os10g27060	92.2905	235.979	-1.3544	0.0045762	0.043285	SET domain protein 123, putative, expressed
LOC_Os10g27310	318.87	764.523	-1.2616	0.00524	0.04789	expressed protein
LOC_Os10g29240	77.029	262.502	-1.7689	0.00023217	0.0040091	expressed protein
LOC_Os10g29320	66.8407	237.671	-1.8302	0.00017416	0.0031538	speckle-type POZ protein, putative, expressed
LOC_Os10g32830	71.7087	198.276	-1.4673	0.0031807	0.03246	kinase, pfkB family, putative, expressed
LOC_Os10g33190	99.2629	280.007	-1.4961	0.0019133	0.021808	expressed protein
LOC_Os10g33550	23.4926	100.108	-2.0913	0.0047726	0.044636	alcohol oxidase-related, putative, expressed
LOC_Os10g33900	99.6523	403.228	-2.0166	0.001208	0.015061	possible lysine decarboxylase domain containing protein, expressed
LOC_Os10g34884	0.713431	11.1637	-3.9679	0.0032118	0.032689	RIPER7 - Ripening-related family protein precursor, expressed
LOC_Os10g35030	2172.43	5659.92	-1.3815	0.0012817	0.015825	IAP100, putative, expressed
LOC_Os10g35520	291.474	810.776	-1.4759	0.001612	0.019042	hydrolase, alpha/beta fold family domain containing protein, expressed
LOC_Os10g35530	128.024	333.153	-1.3798	0.0031223	0.031979	hydrolase, alpha/beta fold family domain containing protein, expressed
LOC_Os10g35810	592.439	1591.04	-1.4252	0.001307	0.016094	thylakoid lumenal protein, putative, expressed
LOC_Os10g36000	993.771	5022.24	-2.3373	2.8636e-07	1.2747e-05	remorin C-terminal domain containing protein, putative, expressed
LOC_Os10g37350	80.7235	264.263	-1.7109	0.00027824	0.0046323	expressed protein
LOC_Os10g38140	136.782	459.035	-1.7467	0.00012886	0.0024592	glutathione S-transferase, putative, expressed
LOC_Os10g38206	78.0637	315.001	-2.0126	2.0918e-05	0.00051926	NADPH-dependent oxidoreductase, putative, expressed
LOC_Os10g38212	0	18.3584	#NAME?	0.00098625	0.012833	NADPH-dependent oxidoreductase, putative, expressed
LOC_Os10g38580	13.5583	68.7688	-2.3426	8.3015e-05	0.0016793	glutathione S-transferase, putative, expressed
LOC_Os10g38940	88.833	423.677	-2.2538	0.0014034	0.017086	fatty acid hydroxylase, putative, expressed
LOC_Os10g39810	364.467	960.562	-1.3981	0.0017006	0.019911	fatty acid hydroxylase, putative, expressed
LOC_Os10g39936	306.294	1515.92	-2.3072	0.00027779	0.0046292	zinc finger, C3HC4 type domain containing protein, expressed
LOC_Os10g40810	1.42686	21.0061	-3.8799	0.00012114	0.0023328	GATA zinc finger domain containing protein, expressed
LOC_Os10g41270	39.1547	185.57	-2.2447	0.00036333	0.0057891	triacylglycerol lipase like protein, putative, expressed
LOC_Os10g42850	9.78319	39.9054	-2.0282	0.0052202	0.047796	WRKY2, expressed
LOC_Os10g42900	411.731	2506.94	-2.6062	4.6862e-06	0.00014465	peptide transporter PTR2, putative, expressed
LOC_Os10g42910	17.9709	197.957	-3.4615	0.00037636	0.0059658	transposon protein, putative, unclassified, expressed
LOC_Os11g01439	2274.24	7292.9	-1.6811	0.00019296	0.0034273	chloroplast unusual positioning protein, putative, expressed
LOC_Os11g02464	148.655	381.049	-1.358	0.0033456	0.033734	vacuolar-sorting receptor precursor, putative, expressed
LOC_Os11g02660	133.431	571.864	-2.0996	5.1416e-06	0.00015655	hydrolase, alpha/beta fold family domain containing protein, expressed
LOC_Os11g02770	48.4956	133.652	-1.4626	0.0031087	0.031858	expressed protein
LOC_Os11g02830	43.9329	124.04	-1.4974	0.0039459	0.0384	protein kinase domain containing protein, expressed
LOC_Os11g03390	322.272	1083.82	-1.7498	0.00012843	0.0024523	FHA domain containing protein, putative, expressed
LOC_Os11g05340	90.7135	410.499	-2.178	0.0001555	0.0028784	transposon protein, putative, unclassified, expressed
LOC_Os11g05552	1477.19	3494.15	-1.2421	0.0047125	0.044212	signal recognition particle 54 kDa protein, chloroplast precursor, putative, expressed
LOC_Os11g06030	135.779	333.892	-1.2981	0.0052462	0.047904	expressed protein
LOC_Os11g06180	13.4628	48.5949	-1.8518	0.002727	0.028695	nodulation-signaling pathway 2 protein, putative, expressed
LOC_Os11g06800	224.118	736.631	-1.7167	0.00016441	0.0030075	retrotransposon protein, putative, unclassified, expressed
LOC_Os11g07260	9.492	36.4849	-1.9425	0.0047932	0.044781	expressed protein
LOC_Os11g07600	598.234	1417.68	-1.2447	0.004911	0.045602	ABC-2 type transporter domain containing protein, expressed
LOC_Os11g07830	25.6445	128.281	-2.3226	1.0448e-05	0.00028722	dirigent, putative, expressed
LOC_Os11g08020	18.2385	142.537	-2.9663	8.1269e-08	4.2346e-06	ankyrin repeat family protein, putative, expressed
LOC_Os11g09070	13.9886	106.737	-2.9317	3.6072e-05	0.00082812	expressed protein
LOC_Os11g09080	13.0291	90.205	-2.7915	1.8836e-06	6.5306e-05	hypothetical protein
LOC_Os11g09140	333.389	803.031	-1.2683	0.0030688	0.03153	DUF803 domain containing, putative, expressed
LOC_Os11g09830	527.096	1264.37	-1.2623	0.0050568	0.046587	expressed protein
LOC_Os11g10300	23.6081	78.8406	-1.7397	0.0015297	0.018277	OsFBX415 - F-box domain containing protein, expressed
LOC_Os11g10320	5063.82	14215.5	-1.4892	0.00097387	0.012689	expressed protein
LOC_Os11g11210	488.258	1192.27	-1.288	0.0037984	0.037331	OsClp12 - Putative Clp protease homologue, expressed
LOC_Os11g12740	69.5193	215.157	-1.6299	0.00082048	0.011113	peptide transporter PTR2, putative, expressed
LOC_Os11g13670	430.45	1180.81	-1.4559	0.0050462	0.046536	gibberellin receptor GID1L2, putative, expressed
LOC_Os11g15170	21.1646	180.489	-3.0922	0.0045073	0.042724	transposon protein, putative, unclassified, expressed
LOC_Os11g17080	42.651	146.706	-1.7823	0.00037041	0.0058871	OsMPK15 - Putative MAPK based on amino acid sequence homology, expressed
LOC_Os11g17380	291.838	1252.96	-2.1021	1.0027e-05	0.00027806	protein kinase domain containing protein, expressed
LOC_Os11g17970	12.8868	198.075	-3.9421	1.7765e-12	2.5502e-10	POT family protein, expressed
LOC_Os11g18100	14.9151	100.248	-2.7487	1.0122e-06	3.8697e-05	hypothetical protein
LOC_Os11g18110	114.618	695.765	-2.6018	5.1246e-07	2.1325e-05	POT family protein, expressed
LOC_Os11g18194	57.3474	304.671	-2.4095	0.00052144	0.0077179	cycloartenol synthase, putative, expressed
LOC_Os11g22360	1.72326	15.0209	-3.1238	0.0035752	0.035568	expressed protein
LOC_Os11g25560	14.1059	61.2652	-2.1188	0.00039779	0.0062391	BHLH transcription factor, putative, expressed
LOC_Os11g25780	710.38	6924.86	-3.2851	1.2128e-05	0.00032449	PB1 domain containing protein, expressed
LOC_Os11g26760	4.82981	64.2617	-3.7339	2.877e-07	1.2775e-05	dehydrin, putative, expressed
LOC_Os11g27540	35.059	109.491	-1.643	0.002139	0.023848	CRP7 - Cysteine-rich family protein precursor, expressed
LOC_Os11g27730	1050.52	2718.25	-1.3716	0.0022755	0.025066	cytochrome P450, putative, expressed
LOC_Os11g28670	4.17002	33.8449	-3.0208	8.9623e-05	0.0017977	hypothetical protein
LOC_Os11g30910	4.6373	63.6438	-3.7787	0.005205	0.047682	sulfotransferase domain containing protein, expressed
LOC_Os11g32369	269.669	653.207	-1.2764	0.0040723	0.039322	expressed protein
LOC_Os11g34110	148.201	621.052	-2.0672	5.6212e-06	0.00016885	heparan-alpha-glucosaminide N-acetyltransferase, putative, expressed
LOC_Os11g34130	651.123	1651.31	-1.3426	0.0022653	0.024992	expressed protein
LOC_Os11g35390	82.5713	208.321	-1.3351	0.0045574	0.043131	MYB family transcription factor, putative, expressed
LOC_Os11g35610	3.07973	19.8118	-2.6855	0.0032961	0.033367	hypothetical protein
LOC_Os11g35620	12.2002	75.9679	-2.6385	8.8474e-06	0.0002506	expressed protein
LOC_Os11g35850	78.4632	289.716	-1.8846	7.6323e-05	0.0015627	expressed protein
LOC_Os11g36150	101.131	296.268	-1.5507	0.0009683	0.01266	receptor-like protein kinase 2 precursor, putative, expressed
LOC_Os11g36190	36.9488	174.63	-2.2407	0.0002283	0.0039576	receptor kinase, putative, expressed
LOC_Os11g37400	7.95797	77.4449	-3.2827	0.00033362	0.0053961	retrotransposon protein, putative, Ty3-gypsy subclass, expressed
LOC_Os11g38480	156.477	465.548	-1.573	0.00068329	0.0095823	NBS-LRR type disease resistance protein, putative, expressed
LOC_Os11g39160	43.5454	425.64	-3.289	0.0025166	0.027103	NBS-LRR disease resistance protein, putative, expressed
LOC_Os11g39190	873.816	3547.81	-2.0215	0.003348	0.033749	NB-ARC domain containing protein, putative, expressed
LOC_Os11g39540	1.60929	24.7744	-3.9444	5.2573e-05	0.0011375	14-3-3 protein, putative, expressed
LOC_Os11g40610	244.402	1294.76	-2.4054	0.0010891	0.013857	EARLY flowering protein, putative, expressed
LOC_Os11g41150	184.445	512.151	-1.4734	0.0016806	0.019709	nitrilase-associated protein, putative, expressed
LOC_Os11g41670	9.91911	65.5854	-2.7251	1.0988e-05	0.00029937	expressed protein
LOC_Os11g41710	541.662	2326.94	-2.103	1.5117e-06	5.4252e-05	cytochrome P450, putative, expressed
LOC_Os11g42030	130.493	586.427	-2.168	2.0535e-06	7.0647e-05	expressed protein
LOC_Os11g44970	20.2951	82.6471	-2.0258	0.0039103	0.038147	NBS-LRR disease resistance protein, putative, expressed
LOC_Os11g44980	0.696682	11.8239	-4.0851	0.0044827	0.042536	expressed protein
LOC_Os11g45710	605.198	1821.43	-1.5896	0.0004842	0.007292	Os11bglu36 SFR2 homologue, expressed
LOC_Os11g46806	51.2438	444.281	-3.116	2.3417e-10	2.1629e-08	retrotransposon protein, putative, unclassified, expressed
LOC_Os11g46810	92.3436	1896.3	-4.36	1.4645e-18	6.9797e-16	retrotransposon protein, putative, unclassified, expressed
LOC_Os11g46870	108.278	451.315	-2.0594	0.00023228	0.0040091	protein kinase, putative, expressed
LOC_Os11g47030	18.4933	169.703	-3.1979	1.22e-05	0.00032616	receptor protein kinase, putative, expressed
LOC_Os11g47240	368.16	5968.32	-4.0189	1.4353e-16	4.9333e-14	leucine-rich repeat receptor protein kinase EXS precursor, putative, expressed
LOC_Os11g47269	49.6671	680.34	-3.7759	0.0012335	0.015341	DEFL44 - Defensin and Defensin-like DEFL family, expressed
LOC_Os11g47278	7.56289	335.456	-5.471	0.0017509	0.020359	hypothetical protein
LOC_Os11g48050	11.8818	44.052	-1.8904	0.0031766	0.032442	expressed protein
LOC_Os12g02000	1.34979	30.388	-4.4927	1.9721e-06	6.8176e-05	expressed protein
LOC_Os12g02390	112.592	290.316	-1.3665	0.0035719	0.035565	vacuolar-sorting receptor precursor, putative, expressed
LOC_Os12g02570	420.491	1181.79	-1.4908	0.00088815	0.011833	expressed protein
LOC_Os12g02810	35.6584	156.307	-2.1321	3.9093e-05	0.00088553	protein kinase domain containing protein, expressed
LOC_Os12g03070	84.8941	223.486	-1.3964	0.003757	0.037011	FHA domain containing protein, putative, expressed
LOC_Os12g03950	34.1702	170.887	-2.3222	0.0049348	0.045757	major facilitator superfamily antiporter, putative, expressed
LOC_Os12g04080	18.3128	96.003	-2.3902	1.6038e-05	0.00041213	transferase family protein, putative, expressed
LOC_Os12g04424	4.48984	27.1029	-2.5937	0.0050079	0.046279	strictosidine synthase, putative, expressed
LOC_Os12g05020	15.5682	94.9273	-2.6082	0.0017361	0.020253	jasmonate-induced protein, putative, expressed
LOC_Os12g05050	3630.16	10288.8	-1.503	0.00067762	0.0095248	stem-specific protein TSJT1, putative, expressed
LOC_Os12g07210	1377.33	8973.18	-2.7037	0.0021568	0.024024	expressed protein
LOC_Os12g07360	184.256	462.839	-1.3288	0.0041381	0.039848	expressed protein
LOC_Os12g09770	4.95044	31.242	-2.6579	0.00041647	0.0064837	O-methyltransferase, putative, expressed
LOC_Os12g10630	251.469	751.779	-1.5799	0.0028143	0.029432	ZF-HD protein dimerisation region containing protein, expressed
LOC_Os12g12934	1256.13	5268.51	-2.0684	0.00071965	0.010009	peptide transporter PTR3-A, putative, expressed
LOC_Os12g13120	256.072	865.693	-1.7573	0.00014009	0.0026382	histidine triad family protein, putative, expressed
LOC_Os12g13550	19.5338	72.4991	-1.892	0.00071168	0.0099139	NBS-LRR disease resistance protein, putative, expressed
LOC_Os12g16280	3573.97	9015.32	-1.3349	0.002663	0.028255	expressed protein
LOC_Os12g16410	222.3	571.998	-1.3635	0.0025967	0.027824	isoflavone reductase, putative, expressed
LOC_Os12g18374	161.125	394.112	-1.2904	0.0049938	0.046208	NB-ARC domain containing protein, expressed
LOC_Os12g18770	170.628	520.308	-1.6085	0.00069608	0.0097384	oxysterol-binding protein, putative, expressed
LOC_Os12g19381	72350.8	172978	-1.2575	0.0038496	0.03771	ribulose bisphosphate carboxylase small chain, chloroplast precursor, putative, expressed
LOC_Os12g19470	17706	44188.9	-1.3194	0.0020994	0.023495	ribulose bisphosphate carboxylase small chain, chloroplast precursor, putative, expressed
LOC_Os12g21784	394.141	1064	-1.4327	0.0014047	0.017096	expressed protein
LOC_Os12g22120	2.43669	18.1984	-2.9008	0.0026293	0.027988	white-brown complex homolog protein 11, putative, expressed
LOC_Os12g22284	48.4796	166.04	-1.7761	0.0005462	0.0080181	white-brown complex homolog protein 11, putative, expressed
LOC_Os12g22489	12.1413	72.2113	-2.5723	2.2573e-05	0.00055236	expressed protein
LOC_Os12g25180	1643.09	4249.86	-1.371	0.0016444	0.01936	expressed protein
LOC_Os12g25490	52.0995	203.928	-1.9687	6.1565e-05	0.0013006	O-methyltransferase, putative, expressed
LOC_Os12g27370	1419.62	4295.97	-1.5975	0.00035647	0.0057037	expressed protein
LOC_Os12g29570	73.3168	257.461	-1.8121	0.00016135	0.0029683	expressed protein
LOC_Os12g30555	244.315	694.088	-1.5064	0.00096061	0.012578	expressed protein
LOC_Os12g31460	1082.23	2974.36	-1.4586	0.00090015	0.011955	heat shock protein DnaJ, putative, expressed
LOC_Os12g34796	269.133	640.597	-1.2511	0.0049116	0.045602	expressed protein
LOC_Os12g36400	1395.42	4107.85	-1.5577	0.00043561	0.006729	transposon protein, putative, Pong sub-class, expressed
LOC_Os12g36420	25.3213	187.029	-2.8848	0.0025211	0.027135	expressed protein
LOC_Os12g36440	4.89012	65.9816	-3.7541	3.2841e-08	1.8722e-06	expressed protein
LOC_Os12g37650	469.074	1432.67	-1.6108	0.00035181	0.0056391	DUF538 domain containing protein, putative, expressed
LOC_Os12g38100	159.829	384.644	-1.267	0.0053423	0.048579	membrane associated DUF588 domain containing protein, putative, expressed
LOC_Os12g38860	55.3306	305.607	-2.4655	5.7606e-07	2.356e-05	transposon protein, putative, unclassified, expressed
LOC_Os12g39200	2103.8	5836.69	-1.4722	0.00095035	0.012466	seed maturation protein PM23, putative, expressed
LOC_Os12g41124	27.8814	109.15	-1.9689	0.0039266	0.038265	expressed protein
LOC_Os12g41860	101.077	378.714	-1.9057	6.6467e-05	0.0013878	START domain containing protein, expressed
LOC_Os12g42220	313.254	805.691	-1.3629	0.0019187	0.021849	expressed protein
LOC_Os12g42400	130.651	590.774	-2.1769	3.3892e-06	0.00010954	nuclear transcription factor Y subunit, putative, expressed
LOC_Os12g42520	338.804	916.297	-1.4354	0.0011905	0.014915	receptor kinase, putative, expressed
LOC_Os12g42760	16.4957	64.2159	-1.9608	0.00086163	0.011548	type IIB DNA topoisomerase, putative, expressed
LOC_Os12g43570	7.91633	36.9877	-2.2241	0.0013902	0.016942	expressed protein
LOC_Os12g43850	57.7996	306.157	-2.4051	7.8014e-07	3.1026e-05	retrotransposon protein, putative, unclassified, expressed
LOC_Os12g44030	83.8661	315.493	-1.9115	4.6254e-05	0.0010156	purple acid phosphatase precursor, putative, expressed
LOC_Os12g44150	1919.23	4937.3	-1.3632	0.0014617	0.017628	plasma membrane ATPase, putative, expressed
