# Supplementary material for: OsLMP1, Encoding a Deubiquitinase, Regulates the Immune Response in Rice
Source: Front Plant Sci. 2022 Jan 18;12:814465. doi: 10.3389/fpls.2021.814465 (PMC8805587; doi:10.3389/fpls.2021.814465)
Supplement: Supplementary Table 2 — Results of GO enrichment analysis of DEGs in the lmp1-1 line vs. the wt line. [file Table_2.xlsx]

## Sheet: up
GO_accession	Description	Term_type	Over_represented_pValue	Corrected_pValue	DEG_item	DEG_list	Bg_item	Bg_list	Gene_names
GO:0016310	phosphorylation	biological_process	9.04e-47	1.42e-43	284	2103	1954	34739	LOC_Os07g34980,LOC_Os06g47720,LOC_Os09g37880,LOC_Os08g13420,LOC_Os02g12420,LOC_Os11g44750,LOC_Os01g60700,LOC_Os07g39520,LOC_Os01g57540,LOC_Os06g41500,LOC_Os09g28180,LOC_Os07g05620,LOC_Os08g10290,LOC_Os01g54700,LOC_Os04g03830,LOC_Os09g33910,LOC_Os07g47230,LOC_Os04g01874,LOC_Os01g02680,LOC_Os04g20680,LOC_Os07g35740,LOC_Os02g13460,LOC_Os04g52840,LOC_Os10g09700,LOC_Os01g49580,LOC_Os06g34960,LOC_Os03g…
GO:0006468	protein phosphorylation	biological_process	1.89e-46	2.02e-43	267	2103	1785	34739	LOC_Os07g33690,LOC_Os10g02360,LOC_Os07g35630,LOC_Os04g41160,LOC_Os09g37834,LOC_Os04g45920,LOC_Os06g46330,LOC_Os12g08180,LOC_Os06g45630,LOC_Os11g18670,LOC_Os02g09960,LOC_Os09g27010,LOC_Os11g35330,LOC_Os05g07450,LOC_Os07g05740,LOC_Os05g46760,LOC_Os12g37980,LOC_Os07g36570,LOC_Os10g33650,LOC_Os06g50920,LOC_Os01g70130,LOC_Os05g25390,LOC_Os01g20900,LOC_Os01g04450,LOC_Os12g41490,LOC_Os04g22120,LOC_Os03g…
GO:0006464	cellular protein modification process	biological_process	3.32e-38	7.13e-36	310	2103	2455	34739	LOC_Os07g09670,LOC_Os10g40490,LOC_Os03g08170,LOC_Os09g38840,LOC_Os01g02690,LOC_Os03g03280,LOC_Os05g39410,LOC_Os07g03900,LOC_Os02g05970,LOC_Os02g12010,LOC_Os03g56250,LOC_Os01g12420,LOC_Os11g41100,LOC_Os05g17604,LOC_Os02g14130,LOC_Os09g39650,LOC_Os11g44440,LOC_Os02g53160,LOC_Os09g12240,LOC_Os01g04550,LOC_Os02g56310,LOC_Os01g72990,LOC_Os02g28720,LOC_Os04g03210,LOC_Os04g44900,LOC_Os03g03890,LOC_Os08g…
GO:0036211	protein modification process	biological_process	3.32e-38	7.13e-36	310	2103	2455	34739	LOC_Os03g50450,LOC_Os08g40270,LOC_Os06g17285,LOC_Os04g30040,LOC_Os07g35700,LOC_Os04g30240,LOC_Os12g06410,LOC_Os04g53994,LOC_Os12g23700,LOC_Os03g57450,LOC_Os04g14570,LOC_Os02g02490,LOC_Os12g30180,LOC_Os04g35270,LOC_Os01g04409,Novel00632,LOC_Os01g04520,LOC_Os04g49460,LOC_Os03g24930,LOC_Os09g38830,LOC_Os02g35010,LOC_Os06g38670,LOC_Os03g48270,LOC_Os02g45750,LOC_Os08g13870,LOC_Os10g38800,LOC_Os05g3439…
GO:0006796	phosphate-containing compound metabolic process	biological_process	3.58e-35	7.06e-33	318	2103	2637	34739	LOC_Os05g03920,Novel00522,LOC_Os01g58610,LOC_Os08g24630,LOC_Os05g30760,LOC_Os11g44430,LOC_Os02g44610,LOC_Os11g02240,LOC_Os08g03240,LOC_Os10g02970,LOC_Os01g37750,LOC_Os03g51459,LOC_Os01g09990,LOC_Os01g04450,LOC_Os12g41490,LOC_Os12g40419,LOC_Os04g22120,LOC_Os03g29410,LOC_Os11g17390,LOC_Os02g33330,LOC_Os05g25390,LOC_Os01g20900,LOC_Os12g37980,LOC_Os07g36570,LOC_Os07g48610,LOC_Os01g70130,LOC_Os10g3365…
GO:0006793	phosphorus metabolic process	biological_process	5.1e-35	9.65e-33	319	2103	2655	34739	LOC_Os04g14840,LOC_Os11g10710,LOC_Os01g70850,LOC_Os05g24010,LOC_Os05g35170,LOC_Os07g48730,LOC_Os07g40630,LOC_Os04g58710,LOC_Os08g24310,LOC_Os07g35340,LOC_Os12g03640,LOC_Os12g01510,LOC_Os01g48020,LOC_Os06g12150,LOC_Os07g35310,LOC_Os01g50410,LOC_Os04g54080,LOC_Os06g47470,LOC_Os09g39640,LOC_Os07g35660,LOC_Os06g12120,LOC_Os04g30330,LOC_Os05g33380,LOC_Os10g20160,LOC_Os07g04000,LOC_Os02g19530,LOC_Os03g…
GO:0043412	macromolecule modification	biological_process	2.92e-34	5.11e-32	323	2103	2728	34739	LOC_Os08g24310,LOC_Os07g35340,LOC_Os07g40630,LOC_Os07g48730,LOC_Os12g10170,LOC_Os05g24010,LOC_Os11g10710,LOC_Os04g14840,LOC_Os01g48020,LOC_Os12g03640,LOC_Os12g01510,LOC_Os04g54080,LOC_Os01g50410,LOC_Os07g35310,LOC_Os04g30330,LOC_Os07g35660,LOC_Os06g12120,LOC_Os09g39640,LOC_Os06g47470,LOC_Os07g29390,LOC_Os03g02330,LOC_Os04g47620,LOC_Os03g15770,LOC_Os03g16740,LOC_Os02g19530,LOC_Os07g04000,LOC_Os10g…
GO:0044267	cellular protein metabolic process	biological_process	1.12e-23	1.82e-21	386	2103	3926	34739	LOC_Os06g12120,LOC_Os04g30330,LOC_Os07g35660,LOC_Os06g47470,LOC_Os09g39640,LOC_Os01g50410,LOC_Os04g54080,LOC_Os07g35310,LOC_Os07g43240,LOC_Os10g26050,LOC_Os01g48020,LOC_Os12g03640,LOC_Os12g01510,LOC_Os03g15370,LOC_Os09g23140,LOC_Os07g40630,LOC_Os08g24310,LOC_Os07g35340,LOC_Os12g10170,LOC_Os05g24010,LOC_Os07g48730,LOC_Os04g14840,LOC_Os11g29870,LOC_Os11g10710,LOC_Os07g25900,LOC_Os01g41510,LOC_Os04g…
GO:0055114	oxidation-reduction process	biological_process	6.23e-11	7.56e-09	253	2103	2738	34739	LOC_Os04g38500,LOC_Os03g08999,LOC_Os10g28350,LOC_Os05g07220,LOC_Os03g50160,LOC_Os06g11210,LOC_Os06g37224,LOC_Os06g23760,LOC_Os04g40470,LOC_Os07g23430,LOC_Os07g46860,LOC_Os02g01890,LOC_Os08g36600,LOC_Os01g61680,LOC_Os06g19070,LOC_Os03g08220,LOC_Os10g17960,LOC_Os07g23380,LOC_Os12g16720,LOC_Os06g39780,LOC_Os11g14910,LOC_Os01g70525,LOC_Os12g04220,LOC_Os02g34940,LOC_Os11g10510,LOC_Os10g37120,LOC_Os04g…
GO:0019538	protein metabolic process	biological_process	3.8e-08	4.49e-06	454	2103	6382	34739	LOC_Os04g54080,LOC_Os01g50410,LOC_Os07g43240,LOC_Os07g35310,LOC_Os06g12120,LOC_Os07g35660,LOC_Os04g30330,LOC_Os09g39640,LOC_Os06g47470,Novel00239,LOC_Os07g48730,LOC_Os05g24010,LOC_Os12g10170,LOC_Os07g35340,LOC_Os08g24310,LOC_Os07g40630,LOC_Os09g23140,LOC_Os11g10710,LOC_Os11g29870,LOC_Os01g70850,LOC_Os04g14840,LOC_Os01g48020,LOC_Os10g26050,LOC_Os03g15370,LOC_Os02g16940,LOC_Os12g01510,LOC_Os12g0364…
GO:0044699	single-organism process	biological_process	4.21e-08	4.85e-06	846	2103	12127	34739	LOC_Os02g04340,LOC_Os08g04350,LOC_Os04g37790,LOC_Os07g37920,LOC_Os02g36619,LOC_Os01g02680,LOC_Os10g30450,LOC_Os04g01874,LOC_Os09g31130,LOC_Os03g18310,LOC_Os01g42330,LOC_Os02g08030,LOC_Os02g36110,LOC_Os01g61190,LOC_Os03g59110,LOC_Os12g28100,LOC_Os04g10160,LOC_Os03g15270,LOC_Os02g43790,LOC_Os11g16260,LOC_Os04g22140,LOC_Os10g38040,LOC_Os07g46830,LOC_Os03g58980,LOC_Os07g39520,LOC_Os10g20350,LOC_Os01g…
GO:0008037	cell recognition	biological_process	9.09e-08	9.54e-06	26	2103	138	34739	LOC_Os09g37840,LOC_Os04g54002,LOC_Os04g54080,LOC_Os04g54120,LOC_Os11g03820,LOC_Os04g53994,LOC_Os09g37834,LOC_Os01g45520,LOC_Os04g12000,LOC_Os05g07450,LOC_Os04g54140,LOC_Os09g37880,LOC_Os08g13420,LOC_Os08g13870,LOC_Os05g34390,LOC_Os07g36570,LOC_Os01g12420,LOC_Os02g32620,LOC_Os04g54130,LOC_Os04g28780,LOC_Os10g20160,LOC_Os12g03640,LOC_Os01g48020,LOC_Os04g15580,LOC_Os01g40499,LOC_Os04g53998
GO:0009856	pollination	biological_process	9.49e-08	9.54e-06	25	2103	129	34739	LOC_Os04g53998,LOC_Os01g48020,LOC_Os01g40499,LOC_Os04g15580,LOC_Os04g28780,LOC_Os04g54130,LOC_Os12g03640,LOC_Os10g20160,LOC_Os02g32620,LOC_Os01g12420,LOC_Os07g36570,LOC_Os08g13870,LOC_Os05g34390,LOC_Os08g13420,LOC_Os09g37880,LOC_Os05g07450,LOC_Os04g54140,LOC_Os01g45520,LOC_Os09g37834,LOC_Os04g53994,LOC_Os04g54120,LOC_Os11g03820,LOC_Os04g54080,LOC_Os04g54002,LOC_Os09g37840
GO:0009875	pollen-pistil interaction	biological_process	9.49e-08	9.54e-06	25	2103	129	34739	LOC_Os08g13420,LOC_Os08g13870,LOC_Os05g34390,LOC_Os05g07450,LOC_Os04g54140,LOC_Os09g37880,LOC_Os01g48020,LOC_Os01g40499,LOC_Os04g15580,LOC_Os04g53998,LOC_Os01g12420,LOC_Os02g32620,LOC_Os07g36570,LOC_Os04g28780,LOC_Os04g54130,LOC_Os12g03640,LOC_Os10g20160,LOC_Os04g54002,LOC_Os04g54080,LOC_Os09g37840,LOC_Os01g45520,LOC_Os04g54120,LOC_Os11g03820,LOC_Os09g37834,LOC_Os04g53994
GO:0048544	recognition of pollen	biological_process	9.49e-08	9.54e-06	25	2103	129	34739	LOC_Os04g53998,LOC_Os01g40499,LOC_Os04g15580,LOC_Os01g48020,LOC_Os10g20160,LOC_Os12g03640,LOC_Os04g54130,LOC_Os04g28780,LOC_Os01g12420,LOC_Os02g32620,LOC_Os07g36570,LOC_Os05g34390,LOC_Os08g13870,LOC_Os08g13420,LOC_Os09g37880,LOC_Os04g54140,LOC_Os05g07450,LOC_Os01g45520,LOC_Os09g37834,LOC_Os04g53994,LOC_Os11g03820,LOC_Os04g54120,LOC_Os04g54002,LOC_Os04g54080,LOC_Os09g37840
GO:0044710	single-organism metabolic process	biological_process	2.46e-07	2.42e-05	468	2103	6328	34739	LOC_Os02g33330,LOC_Os06g02180,LOC_Os05g25390,LOC_Os05g15150,LOC_Os03g29240,LOC_Os04g12960,LOC_Os02g39400,LOC_Os03g58900,LOC_Os01g03030,LOC_Os06g48240,LOC_Os01g37750,LOC_Os03g03034,LOC_Os01g41810,LOC_Os03g51459,LOC_Os03g30950,LOC_Os01g63180,LOC_Os04g59200,Novel00522,LOC_Os06g39880,LOC_Os01g58610,LOC_Os01g11150,LOC_Os05g30760,LOC_Os01g19460,LOC_Os02g38840,LOC_Os07g48750,LOC_Os10g16974,LOC_Os02g1102…
GO:0044706	multi-multicellular organism process	biological_process	1.05e-06	9.94e-05	25	2103	145	34739	LOC_Os01g45520,LOC_Os04g54120,LOC_Os11g03820,LOC_Os09g37834,LOC_Os04g53994,LOC_Os04g54002,LOC_Os04g54080,LOC_Os09g37840,LOC_Os01g48020,LOC_Os04g15580,LOC_Os01g40499,LOC_Os04g53998,LOC_Os02g32620,LOC_Os01g12420,LOC_Os07g36570,LOC_Os04g54130,LOC_Os04g28780,LOC_Os10g20160,LOC_Os12g03640,LOC_Os08g13420,LOC_Os08g13870,LOC_Os05g34390,LOC_Os05g07450,LOC_Os04g54140,LOC_Os09g37880
GO:0005975	carbohydrate metabolic process	biological_process	2.84e-05	0.002396	111	2103	1224	34739	LOC_Os11g38780,LOC_Os01g03710,LOC_Os10g03320,LOC_Os12g36890,LOC_Os01g09570,LOC_Os10g41550,LOC_Os05g33380,LOC_Os05g03400,LOC_Os02g43790,LOC_Os02g50490,LOC_Os12g05110,LOC_Os01g19170,LOC_Os06g44170,LOC_Os02g08030,LOC_Os05g07090,LOC_Os03g18310,LOC_Os03g57880,LOC_Os03g09250,LOC_Os06g36560,LOC_Os04g01874,LOC_Os05g46260,LOC_Os03g28330,LOC_Os07g09670,LOC_Os04g40990,LOC_Os01g61460,LOC_Os07g34410,LOC_Os03g…
GO:0007154	cell communication	biological_process	3.93e-05	0.0032585	144	2103	1728	34739	LOC_Os10g20160,LOC_Os02g10920,LOC_Os01g12420,LOC_Os05g13580,LOC_Os02g32520,LOC_Os06g38980,LOC_Os01g41990,LOC_Os08g39840,LOC_Os01g72150,LOC_Os12g09640,LOC_Os05g50180,LOC_Os01g60420,LOC_Os12g36100,LOC_Os07g09670,LOC_Os01g72530,LOC_Os11g14380,LOC_Os07g12240,LOC_Os07g02660,LOC_Os01g41510,LOC_Os07g02630,LOC_Os03g18010,LOC_Os05g48980,LOC_Os09g24580,LOC_Os10g41800,LOC_Os12g37360,LOC_Os12g10180,LOC_Os12g…
GO:0008150	biological_process	biological_process	4.63e-05	0.003708	1622	2103	25891	34739	LOC_Os09g39650,LOC_Os09g33559,LOC_Os01g72630,LOC_Os03g21710,LOC_Os05g25920,LOC_Os04g37760,LOC_Os03g10150,LOC_Os01g09570,LOC_Os01g60420,LOC_Os02g10920,LOC_Os02g05970,LOC_Os02g46780,LOC_Os11g44730,LOC_Os01g41990,LOC_Os01g65380,LOC_Os01g74510,LOC_Os04g58860,LOC_Os03g03280,LOC_Os03g09250,LOC_Os08g07340,LOC_Os01g42780,LOC_Os02g10850,LOC_Os10g40490,LOC_Os01g57620,LOC_Os03g08170,LOC_Os09g38840,LOC_Os04g…
GO:0031012	extracellular matrix	cellular_component	4.38e-08	4.93e-06	26	2103	122	34739	LOC_Os05g24780,LOC_Os05g13580,LOC_Os01g41990,LOC_Os05g31620,LOC_Os07g48780,LOC_Os12g01400,LOC_Os07g22710,LOC_Os02g50060,LOC_Os11g01390,LOC_Os03g48270,LOC_Os05g50180,LOC_Os06g13180,LOC_Os03g59790,LOC_Os03g59390,LOC_Os07g12240,LOC_Os01g72530,LOC_Os04g41540,LOC_Os01g04330,LOC_Os02g50730,LOC_Os01g41510,LOC_Os03g20370,LOC_Os09g24580,LOC_Os03g53200,LOC_Os10g40859,LOC_Os09g33910,LOC_Os03g57450
GO:0005578	proteinaceous extracellular matrix	cellular_component	3.05e-07	2.94e-05	23	2103	108	34739	LOC_Os05g24780,LOC_Os05g13580,LOC_Os01g41990,LOC_Os05g31620,LOC_Os07g48780,LOC_Os12g01400,LOC_Os07g22710,LOC_Os02g50060,LOC_Os11g01390,LOC_Os03g48270,LOC_Os05g50180,LOC_Os03g59790,LOC_Os03g59390,LOC_Os07g12240,LOC_Os01g72530,LOC_Os01g04330,LOC_Os04g41540,LOC_Os01g41510,LOC_Os03g20370,LOC_Os09g24580,LOC_Os03g53200,LOC_Os03g57450,LOC_Os09g33910
GO:0032559	adenyl ribonucleotide binding	molecular_function	3.19e-47	1.33e-43	445	2103	3952	34739	LOC_Os02g18070,LOC_Os12g09739,LOC_Os11g10710,LOC_Os04g14840,LOC_Os04g41370,LOC_Os08g24310,LOC_Os07g35340,LOC_Os04g58710,LOC_Os07g40630,LOC_Os07g48730,LOC_Os08g28570,LOC_Os05g24010,LOC_Os12g03640,LOC_Os12g01510,LOC_Os02g39884,LOC_Os10g26050,LOC_Os01g48020,LOC_Os10g04060,LOC_Os07g35310,LOC_Os06g12150,LOC_Os12g44210,LOC_Os01g71690,LOC_Os03g08960,LOC_Os04g54080,LOC_Os02g06490,LOC_Os05g43390,LOC_Os01g…
GO:0004672	protein kinase activity	molecular_function	5.61e-47	1.33e-43	279	2103	1912	34739	LOC_Os05g47770,LOC_Os03g45930,LOC_Os11g34624,LOC_Os11g39420,LOC_Os05g40770,LOC_Os07g44290,LOC_Os11g46950,LOC_Os02g34790,LOC_Os11g47710,LOC_Os04g54140,LOC_Os05g44770,LOC_Os04g30060,LOC_Os02g04230,LOC_Os01g16230,LOC_Os12g14480,LOC_Os03g55560,LOC_Os06g38970,LOC_Os07g04220,LOC_Os02g56334,LOC_Os12g24490,LOC_Os11g44500,LOC_Os02g48210,LOC_Os07g22710,LOC_Os07g03950,LOC_Os06g09190,LOC_Os07g35280,LOC_Os03g…
GO:0030554	adenyl nucleotide binding	molecular_function	2.13e-46	2.02e-43	445	2103	3978	34739	LOC_Os05g15150,LOC_Os11g43480,LOC_Os05g25390,LOC_Os01g20900,LOC_Os12g41490,LOC_Os06g48240,LOC_Os01g04450,LOC_Os11g06210,LOC_Os12g40419,LOC_Os04g22120,LOC_Os01g03030,LOC_Os03g29410,LOC_Os11g02240,LOC_Os02g44610,LOC_Os01g72680,LOC_Os08g03240,LOC_Os10g02970,LOC_Os01g09990,LOC_Os05g03920,LOC_Os01g50160,LOC_Os10g16974,LOC_Os11g45090,LOC_Os08g24630,LOC_Os11g44430,LOC_Os08g10260,LOC_Os03g09140,LOC_Os04g…
GO:0016301	kinase activity	molecular_function	1.57e-44	1.24e-41	307	2103	2292	34739	LOC_Os09g39640,LOC_Os06g47470,LOC_Os04g30110,LOC_Os04g30330,LOC_Os07g35660,LOC_Os06g12120,LOC_Os07g35310,LOC_Os06g12150,LOC_Os05g43390,LOC_Os04g54080,LOC_Os01g50410,LOC_Os12g01510,LOC_Os12g03640,LOC_Os01g48020,LOC_Os11g10710,LOC_Os04g14840,LOC_Os07g35340,LOC_Os08g24310,LOC_Os07g40630,LOC_Os07g48730,LOC_Os05g24010,LOC_Os06g07330,LOC_Os06g37620,LOC_Os04g38480,LOC_Os01g04580,LOC_Os06g47530,LOC_Os05g…
GO:0016773	phosphotransferase activity, alcohol group as acceptor	molecular_function	1.81e-43	1.22e-40	298	2103	2213	34739	LOC_Os06g41500,LOC_Os01g57540,LOC_Os07g39520,LOC_Os07g05620,LOC_Os09g28180,LOC_Os09g37880,LOC_Os06g47720,LOC_Os07g34980,LOC_Os01g60700,LOC_Os11g44750,LOC_Os02g12420,LOC_Os08g13420,LOC_Os02g13460,LOC_Os04g52840,LOC_Os04g20680,LOC_Os01g10250,LOC_Os07g35740,LOC_Os06g34960,LOC_Os10g09700,LOC_Os01g49580,LOC_Os01g54700,LOC_Os08g10290,LOC_Os04g01874,LOC_Os01g02680,LOC_Os03g18310,LOC_Os07g47230,LOC_Os09g…
GO:0000166	nucleotide binding	molecular_function	2.77e-43	1.45e-40	499	2103	4759	34739	LOC_Os08g04420,LOC_Os11g11940,LOC_Os12g42020,LOC_Os02g02600,LOC_Os02g18510,LOC_Os05g03620,LOC_Os07g14820,LOC_Os10g07978,LOC_Os11g39290,LOC_Os05g38460,LOC_Os02g09120,LOC_Os04g15580,LOC_Os03g02874,LOC_Os04g53998,LOC_Os02g48290,LOC_Os08g19210,Novel01395,LOC_Os01g72160,LOC_Os08g30740,LOC_Os04g58400,LOC_Os12g35890,LOC_Os10g30540,LOC_Os10g02250,LOC_Os03g17550,LOC_Os11g44560,LOC_Os11g44580,LOC_Os04g5400…
GO:1901265	nucleoside phosphate binding	molecular_function	2.77e-43	1.45e-40	499	2103	4759	34739	LOC_Os08g30780,LOC_Os07g35810,LOC_Os02g18180,LOC_Os03g20949,LOC_Os09g23570,LOC_Os02g13780,LOC_Os04g28780,LOC_Os04g30260,LOC_Os06g45500,LOC_Os04g35890,LOC_Os02g16060,LOC_Os07g07290,LOC_Os12g42040,LOC_Os11g12330,LOC_Os06g29220,Novel00864,LOC_Os03g53220,LOC_Os01g45520,LOC_Os09g39620,LOC_Os01g03690,LOC_Os06g38590,LOC_Os02g43690,LOC_Os12g14520,LOC_Os08g35600,LOC_Os06g11240,LOC_Os11g34880,LOC_Os03g1770…
GO:0032555	purine ribonucleotide binding	molecular_function	4.49e-43	2.12e-40	455	2103	4209	34739	LOC_Os07g39720,LOC_Os12g41490,LOC_Os01g04450,LOC_Os06g48240,LOC_Os01g03030,LOC_Os04g22120,LOC_Os03g29410,LOC_Os12g40419,LOC_Os11g06210,LOC_Os11g43480,LOC_Os05g15150,LOC_Os01g20900,LOC_Os05g25390,LOC_Os11g36400,LOC_Os01g50160,LOC_Os10g16974,LOC_Os05g03920,LOC_Os11g44430,LOC_Os08g24630,LOC_Os11g45090,LOC_Os08g03240,LOC_Os11g02240,LOC_Os01g72680,LOC_Os02g44610,LOC_Os01g09990,LOC_Os10g02970,LOC_Os10g…
GO:0001883	purine nucleoside binding	molecular_function	7.3e-43	2.65e-40	454	2103	4204	34739	LOC_Os11g12240,LOC_Os07g04040,LOC_Os06g36270,LOC_Os04g42480,LOC_Os04g44910,LOC_Os09g30454,LOC_Os10g30530,LOC_Os01g42370,LOC_Os07g48760,LOC_Os06g45020,LOC_Os02g10900,LOC_Os02g32690,LOC_Os04g56110,LOC_Os11g44860,LOC_Os09g38910,LOC_Os02g54600,LOC_Os12g42070,LOC_Os07g03930,LOC_Os07g46870,LOC_Os07g35370,LOC_Os10g36210,LOC_Os05g09440,LOC_Os10g25550,LOC_Os06g43090,LOC_Os07g09470,LOC_Os02g43430,LOC_Os02g…
GO:0032549	ribonucleoside binding	molecular_function	7.3e-43	2.65e-40	454	2103	4204	34739	LOC_Os07g44290,LOC_Os05g40770,LOC_Os11g39420,LOC_Os02g34790,LOC_Os11g46950,LOC_Os05g47770,LOC_Os11g34624,LOC_Os04g30060,LOC_Os11g47780,LOC_Os08g19694,LOC_Os11g40570,LOC_Os02g04230,LOC_Os01g16230,LOC_Os08g41530,LOC_Os04g54140,LOC_Os08g31800,LOC_Os11g06290,LOC_Os05g44770,LOC_Os07g04220,LOC_Os06g38950,LOC_Os02g36590,LOC_Os02g56334,LOC_Os04g45580,LOC_Os12g14480,LOC_Os03g55560,LOC_Os02g20000,LOC_Os07g…
GO:0032550	purine ribonucleoside binding	molecular_function	7.3e-43	2.65e-40	454	2103	4204	34739	LOC_Os12g38550,LOC_Os08g01830,LOC_Os07g35380,LOC_Os05g30454,LOC_Os04g54120,LOC_Os07g33780,LOC_Os04g25900,LOC_Os02g06930,LOC_Os11g03820,LOC_Os10g02250,LOC_Os10g30540,LOC_Os11g44580,LOC_Os04g54002,LOC_Os03g17550,LOC_Os11g44560,LOC_Os01g72160,LOC_Os08g19210,Novel01395,LOC_Os04g58400,LOC_Os08g30740,LOC_Os03g02874,LOC_Os04g15580,LOC_Os04g53998,LOC_Os05g38460,LOC_Os11g39290,LOC_Os07g14820,LOC_Os10g0797…
GO:0032553	ribonucleotide binding	molecular_function	8.05e-43	2.72e-40	458	2103	4253	34739	LOC_Os06g17285,LOC_Os04g10060,LOC_Os09g01960,LOC_Os03g50450,LOC_Os08g40270,LOC_Os01g58510,LOC_Os04g53994,LOC_Os04g30040,LOC_Os07g35700,LOC_Os04g30240,LOC_Os01g04409,LOC_Os04g14570,LOC_Os02g02490,LOC_Os12g30180,LOC_Os03g57450,LOC_Os12g23700,LOC_Os05g48690,LOC_Os01g04520,Novel00632,LOC_Os03g24930,LOC_Os04g49460,LOC_Os06g38670,LOC_Os02g35010,LOC_Os09g38830,LOC_Os08g02450,LOC_Os05g34390,LOC_Os01g5233…
GO:0001882	nucleoside binding	molecular_function	1.25e-42	3.93e-40	454	2103	4213	34739	LOC_Os07g02590,LOC_Os09g29670,LOC_Os09g37880,LOC_Os01g52320,LOC_Os12g17430,LOC_Os07g34980,LOC_Os06g47720,LOC_Os01g42410,LOC_Os11g44750,LOC_Os01g60700,LOC_Os02g12420,LOC_Os08g13420,LOC_Os06g41500,LOC_Os01g57540,LOC_Os07g39520,LOC_Os09g28180,LOC_Os07g05620,LOC_Os02g18080,LOC_Os01g54700,LOC_Os08g10290,LOC_Os12g28100,LOC_Os06g41640,LOC_Os07g47230,LOC_Os03g18310,LOC_Os04g01874,LOC_Os01g02680,LOC_Os04g…
GO:0097367	carbohydrate derivative binding	molecular_function	5.09e-42	1.5e-39	462	2103	4331	34739	LOC_Os12g09640,LOC_Os11g44440,LOC_Os11g06234,LOC_Os02g14130,LOC_Os09g39650,LOC_Os05g17604,LOC_Os08g24650,LOC_Os02g05970,LOC_Os10g03570,LOC_Os02g46780,LOC_Os02g12010,LOC_Os11g41100,LOC_Os01g12420,LOC_Os03g56250,LOC_Os08g07340,LOC_Os05g39410,LOC_Os03g03280,LOC_Os07g03900,LOC_Os11g06300,LOC_Os10g07574,LOC_Os10g30610,LOC_Os07g02630,LOC_Os05g48980,LOC_Os01g02690,LOC_Os04g53160,LOC_Os04g11820,LOC_Os07g…
GO:0036094	small molecule binding	molecular_function	1.49e-41	4.03e-39	505	2103	4898	34739	LOC_Os07g35790,LOC_Os03g14370,LOC_Os11g12340,LOC_Os10g04510,LOC_Os03g59600,LOC_Os04g11780,LOC_Os02g42780,LOC_Os09g29560,Novel00552,LOC_Os12g07990,LOC_Os10g33980,LOC_Os07g03790,LOC_Os11g38790,LOC_Os02g05960,LOC_Os07g28930,LOC_Os01g40499,LOC_Os11g25510,LOC_Os08g34570,LOC_Os10g33440,LOC_Os12g42060,LOC_Os02g43290,LOC_Os09g19350,LOC_Os06g36990,LOC_Os07g04820,LOC_Os05g41370,LOC_Os09g24330,LOC_Os09g3784…
GO:0017076	purine nucleotide binding	molecular_function	1.54e-41	4.03e-39	455	2103	4274	34739	LOC_Os12g10400,LOC_Os01g06510,LOC_Os05g32370,LOC_Os12g33100,LOC_Os10g41390,LOC_Os09g29660,LOC_Os10g17960,LOC_Os11g36410,LOC_Os06g43090,LOC_Os07g09470,LOC_Os02g35210,LOC_Os02g43430,LOC_Os01g52380,LOC_Os05g34270,LOC_Os09g15570,LOC_Os11g37880,LOC_Os06g48250,LOC_Os01g42380,LOC_Os02g41510,LOC_Os05g45880,LOC_Os07g35290,LOC_Os05g07220,LOC_Os06g10790,LOC_Os11g44860,LOC_Os04g56110,LOC_Os02g32690,LOC_Os02g…
GO:0043168	anion binding	molecular_function	1.44e-40	3.59e-38	496	2103	4811	34739	LOC_Os09g35860,LOC_Os06g38970,LOC_Os02g20000,LOC_Os07g02610,LOC_Os03g55560,LOC_Os12g14480,LOC_Os04g45580,LOC_Os02g56334,LOC_Os06g38950,LOC_Os02g36590,LOC_Os03g13300,LOC_Os04g57550,LOC_Os07g04220,LOC_Os09g19280,LOC_Os07g03950,LOC_Os12g44220,LOC_Os07g35280,LOC_Os06g09190,LOC_Os03g51440,LOC_Os01g11340,LOC_Os11g44500,LOC_Os02g45040,LOC_Os07g22710,LOC_Os02g48210,LOC_Os12g08850,LOC_Os01g52470,LOC_Os01g…
GO:0005524	ATP binding	molecular_function	1.22e-39	2.88e-37	405	2103	3676	34739	LOC_Os07g39520,LOC_Os06g41500,LOC_Os01g57540,LOC_Os07g05620,LOC_Os09g28180,LOC_Os01g42410,LOC_Os06g47720,LOC_Os12g17430,LOC_Os07g34980,LOC_Os09g37880,LOC_Os09g29670,LOC_Os08g13420,LOC_Os02g12420,LOC_Os01g60700,LOC_Os11g44750,LOC_Os04g13220,LOC_Os04g52840,LOC_Os02g13460,LOC_Os07g35740,LOC_Os04g20680,LOC_Os06g34960,LOC_Os01g49580,LOC_Os10g09700,LOC_Os06g41640,LOC_Os12g28100,LOC_Os08g10290,LOC_Os01g…
GO:0035639	purine ribonucleoside triphosphate binding	molecular_function	1.08e-37	2.21e-35	422	2103	3952	34739	LOC_Os03g03510,LOC_Os04g53720,LOC_Os02g30900,LOC_Os02g18140,LOC_Os09g39960,LOC_Os04g38910,LOC_Os04g43680,LOC_Os03g38800,LOC_Os07g15930,LOC_Os04g58250,LOC_Os03g59390,LOC_Os02g43290,LOC_Os09g19350,LOC_Os05g41370,LOC_Os07g04820,LOC_Os09g24330,LOC_Os09g37840,LOC_Os04g43440,LOC_Os08g29570,LOC_Os07g03790,LOC_Os11g38790,LOC_Os02g05960,LOC_Os01g40499,LOC_Os07g28930,LOC_Os11g25510,LOC_Os10g33440,LOC_Os12g…
GO:0016740	transferase activity	molecular_function	2.1e-34	3.81e-32	559	2103	5707	34739	LOC_Os05g51780,LOC_Os03g13740,LOC_Os08g40330,LOC_Os05g47660,LOC_Os02g35020,LOC_Os09g27270,LOC_Os02g43430,LOC_Os07g23380,LOC_Os10g17960,LOC_Os01g53040,LOC_Os05g34270,LOC_Os01g52380,LOC_Os02g49480,LOC_Os05g45880,LOC_Os05g45090,LOC_Os01g42380,LOC_Os06g10790,LOC_Os07g46380,LOC_Os02g32690,LOC_Os08g04540,LOC_Os11g44860,LOC_Os09g34960,LOC_Os04g54200,LOC_Os06g45020,LOC_Os06g05284,LOC_Os07g48830,LOC_Os03g…
GO:0016772	transferase activity, transferring phosphorus-containing groups	molecular_function	8.72e-34	1.47e-31	347	2103	3073	34739	LOC_Os03g05700,LOC_Os08g25430,LOC_Os10g10030,LOC_Os09g38850,LOC_Os01g61200,LOC_Os11g39450,LOC_Os01g43480,LOC_Os01g26390,LOC_Os05g48660,LOC_Os04g13210,LOC_Os01g36790,LOC_Os10g34220,LOC_Os07g48780,LOC_Os07g22400,LOC_Os04g58700,LOC_Os04g45170,LOC_Os06g14260,LOC_Os04g54120,LOC_Os02g06930,LOC_Os11g03820,LOC_Os03g10640,LOC_Os08g01830,LOC_Os12g38550,LOC_Os07g35380,LOC_Os03g15020,LOC_Os03g20370,LOC_Os05g…
GO:0030246	carbohydrate binding	molecular_function	4.4e-21	6.78e-19	75	2103	362	34739	LOC_Os07g04040,LOC_Os02g56334,LOC_Os09g30454,LOC_Os04g44910,LOC_Os10g30530,LOC_Os04g49480,LOC_Os07g03950,LOC_Os02g48210,LOC_Os12g42040,LOC_Os09g38910,LOC_Os04g30340,LOC_Os12g42070,LOC_Os07g03930,LOC_Os01g04440,LOC_Os04g30260,LOC_Os03g18910,LOC_Os05g25390,LOC_Os12g03720,LOC_Os07g41600,LOC_Os05g47770,LOC_Os04g22120,LOC_Os03g58900,LOC_Os12g40419,LOC_Os11g46950,LOC_Os07g15930,LOC_Os01g04450,LOC_Os09g…
GO:0003824	catalytic activity	molecular_function	4.45e-21	6.78e-19	1170	2103	16195	34739	LOC_Os01g10110,LOC_Os08g02110,LOC_Os01g16310,LOC_Os09g27270,LOC_Os06g43090,LOC_Os12g16720,LOC_Os07g23380,LOC_Os03g13740,LOC_Os08g40330,LOC_Os05g45880,LOC_Os02g41510,LOC_Os06g10790,LOC_Os07g46380,Novel00790,LOC_Os01g52380,LOC_Os02g49480,LOC_Os03g18779,LOC_Os02g01890,LOC_Os04g44910,LOC_Os11g10980,LOC_Os08g04540,LOC_Os03g40670,LOC_Os09g34960,LOC_Os06g45020,LOC_Os07g48830,LOC_Os03g62480,LOC_Os07g3537…
GO:0043531	ADP binding	molecular_function	7.23e-19	1.07e-16	90	2103	623	34739	LOC_Os11g06234,LOC_Os11g11940,LOC_Os01g52320,LOC_Os07g02590,LOC_Os12g17430,LOC_Os02g18510,LOC_Os10g03570,LOC_Os10g07978,LOC_Os11g39290,LOC_Os03g36920,LOC_Os02g18080,LOC_Os07g02630,LOC_Os12g28100,LOC_Os06g41640,Novel01395,LOC_Os04g53160,LOC_Os11g29920,LOC_Os08g07340,LOC_Os11g44580,LOC_Os01g42330,LOC_Os10g07574,LOC_Os11g06300,LOC_Os04g13220,LOC_Os10g17690,LOC_Os11g14380,LOC_Os09g34160,LOC_Os04g2590…
GO:0043167	ion binding	molecular_function	7.78e-19	1.11e-16	807	2103	10917	34739	LOC_Os03g57310,LOC_Os02g32520,LOC_Os03g15770,LOC_Os03g16740,Novel00555,LOC_Os08g39840,LOC_Os03g17870,LOC_Os11g38780,LOC_Os10g38060,LOC_Os12g09790,LOC_Os06g37620,LOC_Os09g26460,LOC_Os07g25900,LOC_Os12g07640,LOC_Os05g27060,LOC_Os04g38480,LOC_Os06g47530,LOC_Os06g36560,LOC_Os08g26010,LOC_Os02g39884,LOC_Os06g08310,LOC_Os10g26050,LOC_Os04g14840,LOC_Os04g41370,LOC_Os11g10710,LOC_Os04g58710,LOC_Os07g4063…
GO:0005509	calcium ion binding	molecular_function	7.2e-13	1e-10	71	2103	452	34739	LOC_Os11g38780,LOC_Os02g10730,LOC_Os05g50180,LOC_Os01g47410,LOC_Os03g21380,LOC_Os05g13580,LOC_Os07g43800,LOC_Os01g41990,LOC_Os11g04560,LOC_Os09g24580,LOC_Os08g44390,LOC_Os04g52190,LOC_Os09g33910,LOC_Os10g09690,LOC_Os10g02250,LOC_Os04g03830,LOC_Os01g72530,LOC_Os04g20680,LOC_Os06g07330,LOC_Os07g12240,LOC_Os03g20370,LOC_Os09g38840,LOC_Os01g41510,LOC_Os10g09700,LOC_Os02g56370,LOC_Os03g48270,LOC_Os10g…
GO:0003674	molecular_function	molecular_function	1.46e-12	1.97e-10	1893	2103	29525	34739	LOC_Os02g37180,LOC_Os06g20790,LOC_Os08g04420,LOC_Os02g18510,LOC_Os02g09810,LOC_Os09g17930,LOC_Os02g09120,LOC_Os02g36030,LOC_Os10g04520,LOC_Os08g24434,LOC_Os02g48290,LOC_Os04g53998,LOC_Os02g50460,LOC_Os07g26490,LOC_Os01g10590,LOC_Os11g47630,LOC_Os04g58400,LOC_Os05g27730,LOC_Os11g39200,LOC_Os08g15700,LOC_Os10g30540,LOC_Os03g58890,LOC_Os02g14630,LOC_Os04g52190,LOC_Os11g46000,LOC_Os11g03820,LOC_Os04g…
GO:0016491	oxidoreductase activity	molecular_function	6.04e-12	7.92e-10	258	2103	2715	34739	LOC_Os01g68470,LOC_Os10g02070,LOC_Os03g37290,LOC_Os04g48460,LOC_Os01g61610,LOC_Os08g41440,LOC_Os07g08840,LOC_Os04g37740,LOC_Os04g10060,LOC_Os04g10010,LOC_Os01g47760,LOC_Os04g55940,LOC_Os04g15920,LOC_Os11g43760,LOC_Os03g58980,LOC_Os07g46830,LOC_Os08g30210,LOC_Os12g14490,LOC_Os11g16260,LOC_Os05g25640,LOC_Os03g04370,LOC_Os07g33440,LOC_Os01g39860,LOC_Os02g50960,LOC_Os03g49380,LOC_Os01g57730,LOC_Os09g…
GO:0001871	pattern binding	molecular_function	1.22e-11	1.51e-09	39	2103	188	34739	LOC_Os04g30240,LOC_Os09g30454,LOC_Os02g56334,LOC_Os10g10030,LOC_Os04g30110,LOC_Os09g38850,LOC_Os12g41570,LOC_Os01g04520,LOC_Os01g04409,LOC_Os09g38830,LOC_Os01g04530,LOC_Os04g30260,LOC_Os01g04440,LOC_Os12g42070,LOC_Os04g30340,LOC_Os01g04560,LOC_Os09g38910,LOC_Os12g42040,LOC_Os02g56370,LOC_Os03g12470,LOC_Os01g04450,LOC_Os06g07330,LOC_Os04g20680,LOC_Os01g49580,LOC_Os09g38840,LOC_Os12g40419,LOC_Os11g…
GO:0030247	polysaccharide binding	molecular_function	1.22e-11	1.51e-09	39	2103	188	34739	LOC_Os04g29950,LOC_Os01g04430,LOC_Os09g29560,LOC_Os01g04450,LOC_Os06g07330,LOC_Os04g20680,LOC_Os01g49580,LOC_Os12g40419,LOC_Os09g38840,LOC_Os11g46950,LOC_Os10g20470,LOC_Os05g47770,LOC_Os01g04580,LOC_Os04g03830,LOC_Os10g02250,LOC_Os10g09690,LOC_Os03g18310,LOC_Os01g02680,LOC_Os05g25390,LOC_Os09g38830,LOC_Os01g04530,LOC_Os04g30260,LOC_Os01g04440,LOC_Os12g42070,LOC_Os04g30340,LOC_Os09g38910,LOC_Os01g…
GO:0005506	iron ion binding	molecular_function	7.54e-08	8.28e-06	67	2103	535	34739	LOC_Os10g30390,LOC_Os07g29960,LOC_Os07g23570,LOC_Os07g44130,LOC_Os09g26960,LOC_Os01g08810,LOC_Os07g11739,LOC_Os01g52790,LOC_Os06g45960,LOC_Os01g11340,LOC_Os10g05020,LOC_Os08g39660,LOC_Os06g30640,LOC_Os09g39440,LOC_Os12g44250,LOC_Os01g43750,LOC_Os01g66480,LOC_Os07g44140,LOC_Os12g13400,LOC_Os06g39880,LOC_Os04g09920,LOC_Os06g37224,LOC_Os01g65680,LOC_Os04g40470,LOC_Os02g11020,LOC_Os10g16974,LOC_Os10g…
GO:0016705	oxidoreductase activity, acting on paired donors, with incorporation or reduction of molecular oxygen	molecular_function	2.82e-06	0.00026102	66	2103	572	34739	LOC_Os10g36848,LOC_Os07g44110,LOC_Os12g09790,LOC_Os11g29290,LOC_Os07g33440,LOC_Os03g39690,LOC_Os07g23410,LOC_Os05g25640,LOC_Os02g36030,LOC_Os10g09690,LOC_Os02g36110,LOC_Os04g10160,LOC_Os09g27500,LOC_Os02g26810,LOC_Os04g48460,LOC_Os10g21620,LOC_Os09g36080,LOC_Os03g37290,LOC_Os02g32770,LOC_Os05g31740,LOC_Os02g09220,LOC_Os07g26870,LOC_Os01g59000,LOC_Os03g55240,LOC_Os03g53010,LOC_Os03g08410,LOC_Os02g…
GO:0020037	heme binding	molecular_function	5.28e-06	0.00047987	78	2103	721	34739	LOC_Os01g43750,LOC_Os07g44140,LOC_Os01g66480,LOC_Os06g30640,LOC_Os08g39660,LOC_Os03g13210,LOC_Os09g26960,LOC_Os01g08810,LOC_Os06g08400,LOC_Os10g05020,LOC_Os06g45960,LOC_Os01g11340,LOC_Os01g52790,LOC_Os07g11739,LOC_Os03g19580,LOC_Os07g29960,LOC_Os10g30390,LOC_Os07g44130,LOC_Os07g23570,LOC_Os01g22370,LOC_Os01g43720,LOC_Os02g09250,LOC_Os06g39780,LOC_Os12g16720,LOC_Os02g36280,LOC_Os08g02110,LOC_Os10g…
GO:0016757	transferase activity, transferring glycosyl groups	molecular_function	9.39e-06	0.0008372	85	2103	851	34739	LOC_Os09g28420,LOC_Os09g34250,LOC_Os01g45110,LOC_Os02g36840,LOC_Os02g52560,LOC_Os03g12820,LOC_Os09g24924,LOC_Os10g09990,LOC_Os05g47880,LOC_Os06g45110,LOC_Os04g42760,LOC_Os03g55010,LOC_Os02g22650,LOC_Os05g45100,LOC_Os07g48830,LOC_Os03g62480,LOC_Os12g26290,LOC_Os04g51794,LOC_Os10g42750,LOC_Os04g44250,LOC_Os09g34230,LOC_Os10g13810,LOC_Os01g41430,LOC_Os02g51890,LOC_Os08g24750,LOC_Os01g53430,LOC_Os04g…
GO:0046906	tetrapyrrole binding	molecular_function	1.25e-05	0.0010923	78	2103	737	34739	LOC_Os02g09250,LOC_Os01g43720,LOC_Os08g02110,LOC_Os10g37120,LOC_Os12g16720,LOC_Os06g39780,LOC_Os02g36280,LOC_Os04g59200,LOC_Os01g22352,LOC_Os06g19070,LOC_Os02g01890,LOC_Os01g41810,LOC_Os10g16974,LOC_Os02g11020,LOC_Os10g34470,LOC_Os06g37224,LOC_Os04g09920,LOC_Os04g40470,LOC_Os06g39880,LOC_Os05g06970,LOC_Os01g66480,LOC_Os07g44140,LOC_Os01g43750,LOC_Os03g13210,LOC_Os08g39660,LOC_Os06g30640,LOC_Os10g…
GO:0009378	four-way junction helicase activity	molecular_function	1.89e-05	0.0016238	30	2103	232	34739	LOC_Os12g17430,LOC_Os01g42410,LOC_Os08g28570,LOC_Os11g10610,LOC_Os01g45450,LOC_Os06g48250,LOC_Os04g11780,LOC_Os12g44220,LOC_Os08g31800,LOC_Os02g32520,LOC_Os12g28137,LOC_Os01g42380,LOC_Os10g03570,LOC_Os03g02330,LOC_Os01g19260,LOC_Os11g34880,LOC_Os12g28100,LOC_Os08g10260,LOC_Os02g32690,LOC_Os01g43480,LOC_Os12g13380,LOC_Os12g44210,LOC_Os02g06490,LOC_Os12g28177,LOC_Os01g42370,LOC_Os06g48240,LOC_Os03g…
GO:0003724	RNA helicase activity	molecular_function	4.18e-05	0.0034067	25	2103	178	34739	LOC_Os09g29670,LOC_Os01g42410,LOC_Os12g44220,LOC_Os11g37700,LOC_Os06g48250,LOC_Os01g45450,LOC_Os01g50160,LOC_Os01g42380,LOC_Os12g28137,LOC_Os02g32520,LOC_Os02g18180,LOC_Os02g32690,LOC_Os01g19260,LOC_Os12g33100,LOC_Os12g44210,LOC_Os12g28177,LOC_Os02g06490,LOC_Os01g43480,LOC_Os03g45980,LOC_Os10g30610,LOC_Os03g38800,LOC_Os09g29660,LOC_Os01g42370,LOC_Os07g09470,LOC_Os12g28590
GO:0016758	transferase activity, transferring hexosyl groups	molecular_function	4.95e-05	0.0039019	65	2103	626	34739	LOC_Os05g45110,LOC_Os05g07090,LOC_Os06g44170,LOC_Os04g03830,LOC_Os02g14630,LOC_Os04g01874,LOC_Os04g46970,LOC_Os02g22160,LOC_Os07g09670,LOC_Os03g28330,LOC_Os01g61460,LOC_Os10g03320,LOC_Os12g36890,LOC_Os01g53420,LOC_Os03g12510,LOC_Os04g35270,LOC_Os02g17600,LOC_Os05g32660,LOC_Os01g53350,LOC_Os06g12390,LOC_Os07g32010,LOC_Os10g35800,LOC_Os02g39884,LOC_Os01g08090,LOC_Os06g11720,LOC_Os04g51460,LOC_Os02g…
GO:0098519	nucleotide phosphatase activity, acting on free nucleotides	molecular_function	5.98e-05	0.0046343	15	2103	90	34739	LOC_Os12g33100,LOC_Os05g43390,LOC_Os11g37700,LOC_Os06g48250,LOC_Os02g32690,LOC_Os11g12330,LOC_Os01g42410,LOC_Os01g70850,LOC_Os04g11820,LOC_Os01g25386,LOC_Os04g13210,LOC_Os12g10180,LOC_Os01g42380,LOC_Os04g13220,LOC_Os01g42370
GO:0043565	sequence-specific DNA binding	molecular_function	7.6e-05	0.0057926	69	2103	697	34739	LOC_Os05g38140,LOC_Os09g25060,LOC_Os06g10520,LOC_Os09g16510,LOC_Os05g27730,LOC_Os01g43650,LOC_Os05g27060,LOC_Os02g05640,LOC_Os12g36100,LOC_Os02g26430,LOC_Os02g09810,LOC_Os12g02450,LOC_Os03g21710,LOC_Os05g04640,LOC_Os09g28354,LOC_Os01g09080,LOC_Os02g13800,LOC_Os01g72140,LOC_Os05g34980,LOC_Os03g08960,LOC_Os05g14370,LOC_Os02g53100,LOC_Os06g02520,LOC_Os05g50610,LOC_Os05g40070,LOC_Os01g07530,LOC_Os01g…
GO:0004842	ubiquitin-protein transferase activity	molecular_function	9.85e-05	0.0072719	53	2103	492	34739	LOC_Os06g05284,LOC_Os10g40120,LOC_Os02g14990,LOC_Os03g08920,LOC_Os06g03580,LOC_Os11g37230,LOC_Os04g58920,LOC_Os12g24490,LOC_Os02g45780,LOC_Os01g08340,LOC_Os09g39620,LOC_Os12g06410,LOC_Os09g39640,LOC_Os02g28720,LOC_Os05g40810,LOC_Os04g37740,LOC_Os04g42980,LOC_Os12g02210,LOC_Os02g15010,LOC_Os06g09310,LOC_Os06g13080,LOC_Os10g41660,LOC_Os09g29310,LOC_Os06g34870,LOC_Os06g34360,LOC_Os02g36320,LOC_Os03g…
GO:0019787	ubiquitin-like protein transferase activity	molecular_function	9.85e-05	0.0072719	53	2103	492	34739	LOC_Os02g44610,LOC_Os04g27094,LOC_Os09g32730,LOC_Os03g44636,LOC_Os02g46500,LOC_Os06g10800,LOC_Os01g66130,LOC_Os02g15000,LOC_Os06g11450,LOC_Os02g33590,LOC_Os02g50460,LOC_Os05g51780,LOC_Os03g44642,LOC_Os12g17880,LOC_Os03g13740,LOC_Os08g37760,LOC_Os01g11520,LOC_Os03g20870,LOC_Os02g36320,LOC_Os02g36330,LOC_Os06g37620,LOC_Os10g40490,LOC_Os01g06590,LOC_Os12g31540,LOC_Os02g13960,LOC_Os03g04890,LOC_Os05g…

## Sheet: down
GO_accession	Description	Term_type	Over_represented_pValue	Corrected_pValue	DEG_item	DEG_list	Bg_item	Bg_list	Gene_names
GO:0006464	cellular protein modification process	biological_process	7.49e-08	5.01e-05	104	816	2455	34739	LOC_Os04g34290,LOC_Os04g42870,LOC_Os08g02370,LOC_Os11g34110,LOC_Os03g28300,LOC_Os11g46810,LOC_Os04g34250,LOC_Os12g42520,LOC_Os01g07630,LOC_Os11g36190,LOC_Os07g43560,LOC_Os10g25090,LOC_Os07g03880,LOC_Os08g41620,LOC_Os04g43710,LOC_Os06g49010,LOC_Os08g29160,LOC_Os04g34320,LOC_Os08g23410,LOC_Os03g56270,LOC_Os04g39930,LOC_Os09g19390,LOC_Os04g34300,LOC_Os05g01530,LOC_Os08g15060,LOC_Os04g58910,LOC_Os06g…
GO:0006796	phosphate-containing compound metabolic process	biological_process	8.48e-08	5.01e-05	109	816	2637	34739	LOC_Os05g28520,LOC_Os07g42770,LOC_Os01g02580,LOC_Os04g29680,LOC_Os11g17080,LOC_Os12g38860,LOC_Os09g12300,LOC_Os01g65010,LOC_Os08g14940,LOC_Os03g12910,LOC_Os02g42370,LOC_Os02g05980,LOC_Os07g09040,LOC_Os08g14950,LOC_Os12g22120,LOC_Os08g06280,LOC_Os09g19510,LOC_Os08g10250,LOC_Os03g18370,LOC_Os03g47470,LOC_Os06g33720,LOC_Os02g43870,LOC_Os06g04370,LOC_Os03g49510,LOC_Os01g20940,LOC_Os01g01740,LOC_Os02g…
GO:0016310	phosphorylation	biological_process	5.07e-08	5.01e-05	89	816	1954	34739	LOC_Os11g47240,LOC_Os11g17380,LOC_Os01g02370,LOC_Os11g07260,LOC_Os06g22060,LOC_Os05g40540,LOC_Os01g65030,LOC_Os02g43194,LOC_Os08g08140,LOC_Os12g02810,LOC_Os01g47900,LOC_Os11g02830,LOC_Os01g09930,LOC_Os07g36760,LOC_Os01g57560,LOC_Os01g56330,ChrSy.fgenesh.mRNA.14,score=49,LOC_Os03g06680,LOC_Os03g12730,LOC_Os06g22810,LOC_Os01g67360,LOC_Os04g23760,LOC_Os01g02760,LOC_Os11g47030,LOC_Os11g36150,LOC_Os05…
GO:0036211	protein modification process	biological_process	7.49e-08	5.01e-05	104	816	2455	34739	LOC_Os07g42770,LOC_Os01g02580,LOC_Os11g17080,LOC_Os04g29680,LOC_Os03g13010,LOC_Os05g28520,LOC_Os09g12300,LOC_Os12g38860,LOC_Os01g65010,LOC_Os08g14940,LOC_Os02g42370,LOC_Os09g19510,LOC_Os08g14950,LOC_Os02g05980,LOC_Os08g10250,LOC_Os03g18370,LOC_Os03g47470,LOC_Os02g43870,LOC_Os06g04370,LOC_Os02g46750,LOC_Os01g20940,LOC_Os01g01740,LOC_Os04g58910,LOC_Os06g47820,LOC_Os01g68870,LOC_Os03g56270,LOC_Os04g…
GO:0006793	phosphorus metabolic process	biological_process	1.18e-07	5.56e-05	109	816	2655	34739	LOC_Os04g58910,LOC_Os10g08010,LOC_Os06g47820,LOC_Os01g68870,LOC_Os04g39930,LOC_Os03g56270,LOC_Os09g19390,LOC_Os08g15060,LOC_Os04g34300,LOC_Os10g25090,LOC_Os07g43560,LOC_Os11g36190,LOC_Os07g03880,LOC_Os04g43710,LOC_Os08g29160,LOC_Os04g34320,LOC_Os04g34290,LOC_Os06g45710,LOC_Os11g05552,LOC_Os03g28300,LOC_Os11g46810,LOC_Os04g34250,LOC_Os11g34110,LOC_Os04g16740,LOC_Os12g42520,LOC_Os01g07630,LOC_Os05g…
GO:0006468	protein phosphorylation	biological_process	1.43e-07	6.16e-05	82	816	1785	34739	LOC_Os01g42294,LOC_Os05g25370,LOC_Os04g33500,LOC_Os01g66680,LOC_Os05g47560,LOC_Os03g22050,LOC_Os02g13850,LOC_Os07g01710,LOC_Os08g28870,LOC_Os01g02700,LOC_Os01g45380,LOC_Os04g54070,LOC_Os01g14510,LOC_Os05g51190,LOC_Os01g66020,LOC_Os11g47030,LOC_Os11g36150,LOC_Os04g23760,LOC_Os01g02760,LOC_Os06g22810,LOC_Os06g40640,LOC_Os11g46870,LOC_Os01g60060,LOC_Os06g35200,LOC_Os07g43350,ChrSy.fgenesh.mRNA.14,sc…
GO:0043412	macromolecule modification	biological_process	5.22e-07	0.00018982	109	816	2728	34739	LOC_Os06g22810,LOC_Os04g23760,LOC_Os01g02760,LOC_Os11g36150,LOC_Os08g37570,LOC_Os11g47030,LOC_Os01g66020,LOC_Os05g51190,LOC_Os01g61110,LOC_Os07g43350,LOC_Os06g35200,LOC_Os01g60060,LOC_Os11g46870,LOC_Os06g40640,LOC_Os02g28074,LOC_Os12g09770,LOC_Os03g22050,LOC_Os02g13850,LOC_Os05g47560,LOC_Os07g23110,LOC_Os01g66680,LOC_Os04g33500,LOC_Os05g25370,LOC_Os01g42294,LOC_Os01g14510,LOC_Os09g26300,LOC_Os04g…
GO:0006811	ion transport	biological_process	8.69e-06	0.0021621	65	816	1596	34739	LOC_Os05g36994,LOC_Os11g09140,LOC_Os02g09150,LOC_Os02g44155,LOC_Os05g35570,LOC_Os02g30650,LOC_Os07g01810,LOC_Os11g37400,LOC_Os09g36510,LOC_Os06g14030,LOC_Os03g38540,LOC_Os05g05820,LOC_Os03g10090,LOC_Os11g25560,LOC_Os06g48800,LOC_Os03g60480,LOC_Os01g01360,LOC_Os09g38510,LOC_Os07g07646,LOC_Os01g41720,LOC_Os04g37520,LOC_Os01g08190,LOC_Os04g33900,LOC_Os01g71720,LOC_Os02g26380,LOC_Os01g38610,LOC_Os02g…
GO:0009875	pollen-pistil interaction	biological_process	4.36e-05	0.0058854	13	816	129	34739	LOC_Os01g57560,LOC_Os04g34250,LOC_Os04g34300,LOC_Os04g23760,LOC_Os01g66680,LOC_Os01g47900,LOC_Os04g34290,LOC_Os01g65010,LOC_Os04g34320,LOC_Os08g08140,LOC_Os07g36770,LOC_Os04g54070,LOC_Os01g65030
GO:0009856	pollination	biological_process	4.36e-05	0.0058854	13	816	129	34739	LOC_Os01g65010,LOC_Os04g34320,LOC_Os08g08140,LOC_Os07g36770,LOC_Os04g54070,LOC_Os01g65030,LOC_Os01g57560,LOC_Os04g34250,LOC_Os04g34300,LOC_Os04g23760,LOC_Os01g66680,LOC_Os01g47900,LOC_Os04g34290
GO:0048544	recognition of pollen	biological_process	4.36e-05	0.0058854	13	816	129	34739	LOC_Os01g65010,LOC_Os08g08140,LOC_Os04g34320,LOC_Os07g36770,LOC_Os04g54070,LOC_Os01g65030,LOC_Os01g57560,LOC_Os04g34250,LOC_Os04g34300,LOC_Os04g23760,LOC_Os01g66680,LOC_Os01g47900,LOC_Os04g34290
GO:0016740	transferase activity	molecular_function	1.42e-11	6.72e-08	214	816	5707	34739	Novel00909,LOC_Os03g38540,LOC_Os07g23110,LOC_Os01g66680,LOC_Os02g13850,LOC_Os05g41640,LOC_Os02g10690,LOC_Os12g22284,LOC_Os07g01710,LOC_Os11g02660,LOC_Os08g28870,LOC_Os01g45380,LOC_Os01g56370,LOC_Os11g36150,LOC_Os08g37570,LOC_Os03g56900,LOC_Os01g02760,LOC_Os01g67360,LOC_Os06g22810,LOC_Os12g04080,LOC_Os02g28340,LOC_Os07g13770,LOC_Os03g43010,LOC_Os07g42420,LOC_Os06g35200,LOC_Os06g08830,LOC_Os10g0578…
GO:0043168	anion binding	molecular_function	4.51e-08	5.01e-05	177	816	4811	34739	LOC_Os03g36540,Novel01092,LOC_Os07g49110,LOC_Os03g12730,LOC_Os07g36760,LOC_Os01g57560,LOC_Os03g06680,LOC_Os02g27500,LOC_Os11g02830,LOC_Os11g39160,LOC_Os01g40820,LOC_Os01g65030,LOC_Os05g40540,LOC_Os08g42700,LOC_Os11g17380,LOC_Os05g35500,LOC_Os01g02370,LOC_Os07g25540,LOC_Os11g09830,LOC_Os05g30220,LOC_Os08g28870,LOC_Os07g01710,LOC_Os12g22284,LOC_Os05g15160,LOC_Os01g45380,LOC_Os03g07360,LOC_Os03g3854…
GO:0003824	catalytic activity	molecular_function	7.55e-08	5.01e-05	467	816	16195	34739	LOC_Os09g30510,LOC_Os02g43870,LOC_Os08g31630,LOC_Os02g32250,LOC_Os03g49510,LOC_Os01g01740,LOC_Os02g46750,LOC_Os05g35540,LOC_Os01g60730,LOC_Os03g08730,LOC_Os06g44540,LOC_Os03g40550,LOC_Os02g05980,LOC_Os02g41954,LOC_Os07g09040,LOC_Os12g22120,LOC_Os09g19510,LOC_Os10g38940,LOC_Os10g09850,LOC_Os06g10170,LOC_Os09g28630,LOC_Os05g28520,LOC_Os04g57140,LOC_Os04g29680,LOC_Os07g42770,LOC_Os11g17080,LOC_Os03g…
GO:0016772	transferase activity, transferring phosphorus-containing groups	molecular_function	2.21e-08	5.01e-05	125	816	3073	34739	LOC_Os01g47900,LOC_Os11g02830,LOC_Os01g09930,LOC_Os07g36760,LOC_Os01g56330,LOC_Os01g57560,LOC_Os03g06680,ChrSy.fgenesh.mRNA.14,score=49,LOC_Os03g12730,LOC_Os07g01860,LOC_Os11g44970,LOC_Os08g17655,LOC_Os05g04610,LOC_Os05g35520,LOC_Os11g47240,LOC_Os11g17380,LOC_Os01g02370,LOC_Os07g46490,LOC_Os11g07260,LOC_Os06g22060,LOC_Os05g40540,LOC_Os01g65030,LOC_Os08g08140,LOC_Os12g02810,LOC_Os05g47560,LOC_Os05…
GO:0016301	kinase activity	molecular_function	1.15e-07	5.56e-05	99	816	2292	34739	LOC_Os05g04610,LOC_Os11g47240,LOC_Os11g17380,LOC_Os01g02370,LOC_Os11g07260,LOC_Os07g46490,LOC_Os06g22060,LOC_Os01g65030,LOC_Os05g40540,LOC_Os08g08140,LOC_Os12g02810,LOC_Os11g02830,LOC_Os01g47900,LOC_Os01g09930,LOC_Os07g36760,LOC_Os01g57560,LOC_Os01g56330,ChrSy.fgenesh.mRNA.14,score=49,LOC_Os03g06680,LOC_Os03g12730,LOC_Os06g22810,LOC_Os01g02760,LOC_Os04g23760,LOC_Os11g47030,LOC_Os11g36150,LOC_Os05…
GO:0036094	small molecule binding	molecular_function	3.18e-07	0.00012536	175	816	4898	34739	LOC_Os04g16740,LOC_Os12g42520,LOC_Os01g07630,LOC_Os11g46810,LOC_Os11g05552,LOC_Os04g34320,LOC_Os05g06530,LOC_Os07g03880,LOC_Os04g43710,LOC_Os10g25090,LOC_Os04g35420,LOC_Os08g15030,LOC_Os07g43560,LOC_Os01g15580,LOC_Os08g15060,LOC_Os04g34300,LOC_Os10g08014,LOC_Os05g15940,LOC_Os03g63150,LOC_Os01g57280,LOC_Os10g08010,LOC_Os01g01740,LOC_Os11g06030,LOC_Os02g46750,LOC_Os08g42100,LOC_Os02g43870,LOC_Os02g…
GO:0004672	protein kinase activity	molecular_function	2.05e-06	0.00069158	83	816	1912	34739	LOC_Os04g33500,LOC_Os05g25370,LOC_Os01g42294,LOC_Os02g13850,LOC_Os03g22050,LOC_Os05g47560,LOC_Os01g66680,LOC_Os01g02700,LOC_Os08g28870,LOC_Os07g01710,LOC_Os01g14510,LOC_Os04g54070,LOC_Os01g45380,LOC_Os11g36150,LOC_Os11g47030,LOC_Os01g66020,LOC_Os05g51190,LOC_Os01g61110,LOC_Os06g22810,LOC_Os01g02760,LOC_Os04g23760,LOC_Os01g60060,LOC_Os11g46870,LOC_Os06g40640,LOC_Os07g43350,LOC_Os06g35200,LOC_Os01g…
GO:1901265	nucleoside phosphate binding	molecular_function	3.22e-06	0.00095196	168	816	4759	34739	LOC_Os02g27500,LOC_Os03g06680,LOC_Os07g36760,LOC_Os01g57560,LOC_Os11g39160,LOC_Os01g40820,LOC_Os01g01910,LOC_Os11g02830,Novel01092,LOC_Os03g36540,LOC_Os12g44150,LOC_Os07g49110,LOC_Os03g12730,LOC_Os11g17380,LOC_Os05g35500,LOC_Os01g02370,LOC_Os08g42700,LOC_Os07g25540,LOC_Os11g09830,LOC_Os05g40540,LOC_Os01g65030,LOC_Os03g56280,LOC_Os01g39960,LOC_Os03g07360,LOC_Os01g66680,LOC_Os08g04460,LOC_Os02g1385…
GO:0000166	nucleotide binding	molecular_function	3.22e-06	0.00095196	168	816	4759	34739	LOC_Os01g64880,LOC_Os11g36150,LOC_Os03g56900,LOC_Os01g02760,LOC_Os06g22810,LOC_Os09g24800,LOC_Os03g43010,LOC_Os08g14440,LOC_Os03g26130,LOC_Os06g35200,LOC_Os01g39960,LOC_Os03g07360,LOC_Os01g66680,LOC_Os02g13850,LOC_Os08g04460,LOC_Os05g15160,LOC_Os12g22284,LOC_Os07g01710,LOC_Os05g30220,LOC_Os08g28870,LOC_Os01g45380,LOC_Os05g35500,LOC_Os01g02370,LOC_Os11g17380,LOC_Os08g42700,LOC_Os11g09830,LOC_Os07g…
GO:0016705	oxidoreductase activity, acting on paired donors, with incorporation or reduction of molecular oxygen	molecular_function	7.19e-06	0.0019986	33	816	572	34739	LOC_Os11g27730,LOC_Os01g39960,LOC_Os06g10170,LOC_Os08g36860,LOC_Os01g43844,LOC_Os01g69080,LOC_Os03g12910,LOC_Os02g27200,LOC_Os01g16020,LOC_Os10g26510,LOC_Os09g35940,LOC_Os03g64415,LOC_Os09g37620,LOC_Os06g33720,LOC_Os08g43390,LOC_Os02g36150,LOC_Os05g01120,LOC_Os02g45310,LOC_Os05g29750,LOC_Os03g36419,LOC_Os07g43370,LOC_Os06g37330,LOC_Os02g07680,LOC_Os10g23180,LOC_Os10g08474,LOC_Os06g37364,LOC_Os02g…
GO:0005524	ATP binding	molecular_function	8.56e-06	0.0021621	135	816	3676	34739	LOC_Os03g07360,LOC_Os01g66680,LOC_Os02g13850,LOC_Os07g01710,LOC_Os12g22284,LOC_Os05g15160,LOC_Os08g28870,LOC_Os05g30220,LOC_Os01g45380,LOC_Os11g36150,LOC_Os01g02760,LOC_Os03g56900,LOC_Os06g22810,LOC_Os09g24800,LOC_Os08g14440,LOC_Os03g43010,LOC_Os03g26130,LOC_Os06g35200,LOC_Os03g06680,LOC_Os07g36760,LOC_Os01g57560,LOC_Os01g40820,LOC_Os11g02830,Novel01092,LOC_Os03g36540,LOC_Os07g49110,LOC_Os03g1273…
GO:0016773	phosphotransferase activity, alcohol group as acceptor	molecular_function	1.07e-05	0.0025206	90	816	2213	34739	LOC_Os02g05980,LOC_Os08g14950,LOC_Os09g19510,LOC_Os02g42370,LOC_Os08g10250,LOC_Os05g28520,LOC_Os01g02580,LOC_Os07g42770,LOC_Os11g17080,LOC_Os04g29680,LOC_Os08g14940,LOC_Os01g65010,LOC_Os12g38860,LOC_Os09g12300,LOC_Os01g50080,LOC_Os06g04370,LOC_Os02g43870,LOC_Os02g46750,LOC_Os03g49510,LOC_Os01g01740,LOC_Os03g18370,LOC_Os03g47470,LOC_Os09g19390,LOC_Os04g39930,LOC_Os03g56270,LOC_Os08g15060,LOC_Os04g…
GO:0035639	purine ribonucleoside triphosphate binding	molecular_function	1.17e-05	0.0026236	142	816	3952	34739	LOC_Os11g44970,LOC_Os06g51460,LOC_Os01g56330,LOC_Os06g44460,ChrSy.fgenesh.mRNA.14,score=49,LOC_Os01g52540,LOC_Os01g47900,LOC_Os01g09930,LOC_Os08g08140,LOC_Os02g50560,LOC_Os12g02810,LOC_Os11g07260,LOC_Os10g13694,LOC_Os11g47240,LOC_Os09g24820,LOC_Os07g05570,LOC_Os05g04610,LOC_Os01g02700,LOC_Os01g14510,LOC_Os05g44560,LOC_Os04g54070,LOC_Os04g33500,LOC_Os05g25370,LOC_Os03g59640,LOC_Os01g42294,LOC_Os02…
GO:0032553	ribonucleotide binding	molecular_function	1.76e-05	0.0037792	150	816	4253	34739	LOC_Os04g34290,LOC_Os08g43400,LOC_Os03g28300,LOC_Os04g34250,LOC_Os11g36190,LOC_Os09g02650,LOC_Os01g27230,LOC_Os04g39930,LOC_Os03g56270,LOC_Os09g19390,LOC_Os11g35390,LOC_Os04g58910,LOC_Os01g12900,LOC_Os06g47820,LOC_Os01g68870,LOC_Os03g59264,LOC_Os06g04370,LOC_Os01g25710,LOC_Os03g06440,LOC_Os03g64415,LOC_Os03g18370,LOC_Os03g47470,LOC_Os02g42370,LOC_Os02g20850,LOC_Os08g10250,LOC_Os06g21210,LOC_Os01g…
GO:0032559	adenyl ribonucleotide binding	molecular_function	2.56e-05	0.0042861	141	816	3952	34739	LOC_Os08g15060,LOC_Os10g08014,LOC_Os04g34300,LOC_Os01g57280,LOC_Os03g63150,LOC_Os10g08010,LOC_Os04g16740,LOC_Os01g07630,LOC_Os12g42520,LOC_Os11g46810,LOC_Os11g05552,LOC_Os04g34320,LOC_Os05g06530,LOC_Os04g43710,LOC_Os07g03880,LOC_Os04g35420,LOC_Os10g25090,LOC_Os07g43560,LOC_Os01g15580,LOC_Os02g05980,LOC_Os08g14950,LOC_Os09g19510,LOC_Os12g22120,LOC_Os02g47605,LOC_Os12g38860,LOC_Os01g50080,LOC_Os04g…
GO:0097367	carbohydrate derivative binding	molecular_function	2.71e-05	0.0042861	151	816	4331	34739	LOC_Os08g15060,LOC_Os04g34300,LOC_Os10g08014,LOC_Os01g57280,LOC_Os03g63150,LOC_Os10g08010,LOC_Os11g46810,LOC_Os04g16740,LOC_Os01g07630,LOC_Os12g42520,LOC_Os11g05552,LOC_Os05g06530,LOC_Os04g34320,LOC_Os10g25090,LOC_Os04g35420,LOC_Os01g15580,LOC_Os07g43560,LOC_Os04g43710,LOC_Os07g03880,LOC_Os03g40550,LOC_Os02g05980,LOC_Os08g14950,LOC_Os09g19510,LOC_Os12g22120,LOC_Os02g47605,LOC_Os12g38860,LOC_Os01g…
GO:0043167	ion binding	molecular_function	2.7e-05	0.0042861	325	816	10917	34739	LOC_Os11g35390,LOC_Os05g29750,LOC_Os05g07140,LOC_Os09g19390,LOC_Os02g36264,LOC_Os01g68870,LOC_Os02g53530,LOC_Os04g58910,LOC_Os02g39710,LOC_Os07g33560,LOC_Os08g43400,LOC_Os06g14370,LOC_Os04g34290,LOC_Os06g08670,LOC_Os09g02650,LOC_Os11g36190,LOC_Os03g22634,LOC_Os08g39430,LOC_Os09g03380,LOC_Os02g20850,LOC_Os08g34984,LOC_Os02g42370,LOC_Os08g14940,LOC_Os01g65010,LOC_Os01g02580,LOC_Os06g21210,LOC_Os01g…
GO:0001882	nucleoside binding	molecular_function	2.72e-05	0.0042861	148	816	4213	34739	LOC_Os12g22120,LOC_Os08g14950,LOC_Os09g19510,LOC_Os02g05980,LOC_Os03g40550,LOC_Os01g50080,LOC_Os12g38860,LOC_Os02g47605,LOC_Os07g42770,LOC_Os04g29680,LOC_Os11g17080,LOC_Os05g28520,LOC_Os04g57140,LOC_Os03g38330,LOC_Os11g06030,LOC_Os02g46750,LOC_Os01g01740,LOC_Os02g17920,LOC_Os02g43870,LOC_Os05g35540,LOC_Os12g42760,LOC_Os04g34300,LOC_Os10g08014,LOC_Os08g15060,LOC_Os01g57280,LOC_Os03g63150,LOC_Os10g…
GO:0001883	purine nucleoside binding	molecular_function	2.44e-05	0.0042861	148	816	4204	34739	LOC_Os11g39190,LOC_Os11g07600,LOC_Os10g36000,LOC_Os06g40640,LOC_Os11g46870,LOC_Os01g60060,LOC_Os08g10440,LOC_Os12g18374,LOC_Os07g43350,LOC_Os05g51190,Novel01046,LOC_Os01g66020,LOC_Os11g47030,LOC_Os12g13550,LOC_Os04g23760,LOC_Os01g02700,LOC_Os05g44560,LOC_Os04g54070,LOC_Os01g14510,LOC_Os03g59640,LOC_Os01g42294,LOC_Os05g25370,LOC_Os02g47020,LOC_Os04g33500,LOC_Os05g47560,LOC_Os03g22050,LOC_Os08g0814…
GO:0032550	purine ribonucleoside binding	molecular_function	2.44e-05	0.0042861	148	816	4204	34739	LOC_Os11g05552,LOC_Os11g46810,LOC_Os04g16740,LOC_Os12g42520,LOC_Os01g07630,LOC_Os04g35420,LOC_Os10g25090,LOC_Os07g43560,LOC_Os01g15580,LOC_Os04g43710,LOC_Os07g03880,LOC_Os05g06530,LOC_Os04g34320,LOC_Os08g15060,LOC_Os10g08014,LOC_Os04g34300,LOC_Os10g08010,LOC_Os01g57280,LOC_Os03g63150,LOC_Os02g43870,LOC_Os02g17920,LOC_Os01g01740,LOC_Os11g06030,LOC_Os02g46750,LOC_Os12g42760,LOC_Os05g35540,LOC_Os02g…
GO:0032555	purine ribonucleotide binding	molecular_function	2.57e-05	0.0042861	148	816	4209	34739	LOC_Os01g45380,LOC_Os05g15160,LOC_Os12g22284,LOC_Os07g01710,LOC_Os08g28870,LOC_Os05g30220,LOC_Os01g66680,LOC_Os02g13850,LOC_Os03g07360,LOC_Os06g35200,LOC_Os03g26130,LOC_Os09g24800,LOC_Os03g43010,LOC_Os08g14440,LOC_Os03g56900,LOC_Os01g02760,LOC_Os06g22810,LOC_Os11g36150,LOC_Os03g12730,LOC_Os07g49110,Novel01092,LOC_Os03g36540,LOC_Os01g40820,LOC_Os11g39160,LOC_Os11g02830,LOC_Os03g06680,LOC_Os02g2750…
GO:0032549	ribonucleoside binding	molecular_function	2.44e-05	0.0042861	148	816	4204	34739	LOC_Os11g47240,LOC_Os07g05570,LOC_Os09g24820,LOC_Os05g04610,LOC_Os08g08140,LOC_Os12g02810,LOC_Os02g50560,LOC_Os11g07260,LOC_Os10g13694,LOC_Os01g56330,LOC_Os06g44460,ChrSy.fgenesh.mRNA.14,score=49,LOC_Os01g52540,LOC_Os01g47900,LOC_Os01g09930,LOC_Os11g44970,LOC_Os06g51460,LOC_Os11g47030,LOC_Os12g13550,LOC_Os05g51190,LOC_Os01g66020,Novel01046,LOC_Os04g23760,LOC_Os11g46870,LOC_Os01g60060,LOC_Os11g076…
GO:0030554	adenyl nucleotide binding	molecular_function	3.49e-05	0.0053155	141	816	3978	34739	LOC_Os02g42370,LOC_Os08g10250,LOC_Os06g21210,LOC_Os01g02580,LOC_Os09g12300,LOC_Os01g65010,LOC_Os08g14940,LOC_Os06g04370,LOC_Os03g06440,LOC_Os01g25710,LOC_Os03g18370,LOC_Os03g64415,LOC_Os03g47470,LOC_Os03g56270,LOC_Os04g39930,LOC_Os09g19390,LOC_Os11g35390,LOC_Os04g58910,LOC_Os06g47820,LOC_Os01g68870,LOC_Os04g34290,LOC_Os08g43400,LOC_Os03g28300,LOC_Os04g34250,LOC_Os11g36190,LOC_Os09g02650,LOC_Os05g…
GO:0005215	transporter activity	molecular_function	4.04e-05	0.0058854	83	816	2238	34739	LOC_Os08g01030,LOC_Os05g02240,LOC_Os01g70310,LOC_Os07g30810,Novel00147,LOC_Os10g29320,LOC_Os07g01214,LOC_Os03g55100,LOC_Os12g18770,LOC_Os04g56370,LOC_Os11g05552,LOC_Os08g02370,LOC_Os03g12790,LOC_Os05g40010,LOC_Os04g55800,LOC_Os01g07630,LOC_Os04g16740,LOC_Os06g43660,LOC_Os02g31910,LOC_Os06g38350,LOC_Os05g49430,LOC_Os03g12530,LOC_Os05g40000,LOC_Os04g39930,LOC_Os10g08014,LOC_Os05g35540,LOC_Os05g3368…
GO:0031406	carboxylic acid binding	molecular_function	5.19e-05	0.0066277	9	816	74	34739	LOC_Os08g14440,LOC_Os05g15940,LOC_Os12g36440,LOC_Os08g15030,LOC_Os03g38540,LOC_Os06g44460,LOC_Os02g39570,LOC_Os07g46790,LOC_Os08g42100
GO:0043177	organic acid binding	molecular_function	5.19e-05	0.0066277	9	816	74	34739	LOC_Os12g36440,LOC_Os08g15030,LOC_Os08g14440,LOC_Os05g15940,LOC_Os07g46790,LOC_Os08g42100,LOC_Os02g39570,LOC_Os06g44460,LOC_Os03g38540
GO:0017076	purine nucleotide binding	molecular_function	5.64e-05	0.0070105	148	816	4274	34739	LOC_Os05g04610,LOC_Os09g24820,LOC_Os07g05570,LOC_Os11g47240,LOC_Os11g07260,LOC_Os10g13694,LOC_Os08g08140,LOC_Os02g50560,LOC_Os12g02810,LOC_Os01g09930,LOC_Os01g47900,LOC_Os01g52540,LOC_Os06g44460,ChrSy.fgenesh.mRNA.14,score=49,LOC_Os01g56330,LOC_Os06g51460,LOC_Os11g44970,LOC_Os04g23760,LOC_Os05g51190,Novel01046,LOC_Os01g66020,LOC_Os11g47030,LOC_Os12g13550,LOC_Os08g10440,LOC_Os12g18374,LOC_Os07g433…
