# Supplementary material for: OsLMP1, Encoding a Deubiquitinase, Regulates the Immune Response in Rice
Source: Front Plant Sci. 2022 Jan 18;12:814465. doi: 10.3389/fpls.2021.814465 (PMC8805587; doi:10.3389/fpls.2021.814465)
Supplement: Supplementary Table 3 — Results of KEGG analysis of the lmp1-1 line vs. the wt line. [file Table_3.xls]

## Sheet: lmp1-1vsNip_up_KEGG 
##Databases: KEGG PATHWAY
##Statistical test method: hypergeometric test / Fisher's exact test
##FDR correction method: Benjamini and Hochberg
#Term	Database	ID	Input number	Background number	P-Value	Corrected P-Value	Input	KEGG_ID/KO	Entrez_ID	Hyperlink
Plant-pathogen interaction	KEGG PATHWAY	osa04626	42	130	1.54e-08	1.47e-06	LOC_Os03g08330|LOC_Os05g45210|LOC_Os10g11500|LOC_Os09g33910|LOC_Os05g39720|LOC_Os11g01390|LOC_Os01g72530|ChrSy.fgenesh.mRNA.42,score=142|LOC_Os02g54600|LOC_Os01g72080|LOC_Os06g48520|LOC_Os10g25290|LOC_Os07g48780|LOC_Os03g20370|LOC_Os01g41990|LOC_Os05g31620|LOC_Os07g42370|LOC_Os03g57450|Novel00864|LOC_Os03g53200|LOC_Os01g04330|LOC_Os03g08320|LOC_Os04g43440|LOC_Os06g10580|LOC_Os03g48270|LOC_Os05g50…	osa:4331834|osa:4339397|osa:4348237|osa:4347564|osa:4339092|osa:4351256|osa:4325408|osa:4326180|osa:4330957|osa:4325760|osa:4346575|osa:4348533|osa:4344344|osa:4344344|osa:4324100|osa:4338633|osa:4343899|osa:4334366|osa:4333845|osa:4334072|osa:4325693|osa:4331833|osa:4325862|osa:4330882|osa:4333767|osa:4339701|osa:4343002|osa:4336258|osa:4327518|osa:4351256|osa:4335698|osa:4329463|osa:4332731|osa…	4331834|4339397|4348237|4347564|4339092|4351256|4325408|4326180|4330957|4325760|4346575|4348533|4344344|4344344|4324100|4338633|4343899|4334366|4333845|4334072|4325693|4331833|4325862|4330882|4333767|4339701|4343002|4336258|4327518|4351256|4335698|4329463|4332731|4337206|4338474|4325693|4333845|4346304|4334519|4346097|4331832|4344525|	http://www.genome.jp/kegg-bin/show_pathway?osa04626/osa:4324100%09red/osa:4346097%09red/osa:4331834%09red/osa:4331832%09red/osa:4331833%09red/osa:4339092%09red/osa:4330957%09red/osa:4339397%09red/osa:4344525%09red/osa:4325693%09red/osa:4348533%09red/osa:4334519%09red/osa:4347564%09red/osa:4334366%09red/osa:4338474%09red/osa:4343002%09red/osa:4339701%09red/osa:4335698%09red/osa:4329463%09red/osa:4…
alpha-Linolenic acid metabolism	KEGG PATHWAY	osa00592	14	33	0.000106197	0.00509746	LOC_Os12g26290|LOC_Os05g07090|LOC_Os06g11210|LOC_Os03g05780|LOC_Os11g39220|LOC_Os03g08220|LOC_Os06g23760|LOC_Os06g11240|LOC_Os04g37430|LOC_Os03g12500|LOC_Os08g39850|LOC_Os08g39840|LOC_Os06g23780|LOC_Os10g31950	osa:4352160|osa:4337904|osa:4340485|osa:4331515|osa:4340986|osa:4331824|osa:4324062|osa:4340486|osa:4331824|osa:4332121|osa:4345994|osa:4345993|osa:4340972|osa:4348804|	4352160|4337904|4340485|4331515|4340986|4331824|4324062|4340486|4331824|4332121|4345994|4345993|4340972|4348804|	http://www.genome.jp/kegg-bin/show_pathway?osa00592/osa:4331515%09red/osa:4340986%09red/osa:4331824%09red/osa:4337904%09red/osa:4345993%09red/osa:4340972%09red/osa:4345994%09red/osa:4348804%09red/osa:4332121%09red/osa:4340486%09red/osa:4340485%09red/osa:4324062%09red/osa:4352160%09red
Diterpenoid biosynthesis	KEGG PATHWAY	osa00904	12	27	0.000233859	0.00748347	LOC_Os04g09900|LOC_Os04g10060|LOC_Os04g10010|LOC_Os11g28530|LOC_Os02g36070|LOC_Os12g30824|LOC_Os01g11150|LOC_Os04g09920|LOC_Os06g39780|LOC_Os02g36140|LOC_Os02g36110|LOC_Os02g36285	osa:4335090|osa:4335094|osa:4335093|osa:4350502|osa:4329722|osa:4352248|osa:4325537|osa:4335091|osa:4341447|osa:4329724|osa:4329723|osa:4329724|	4335090|4335094|4335093|4350502|4329722|4352248|4325537|4335091|4341447|4329724|4329723|4329724|	http://www.genome.jp/kegg-bin/show_pathway?osa00904/osa:4352248%09red/osa:4335091%09red/osa:4341447%09red/osa:4335090%09red/osa:4325537%09red/osa:4335093%09red/osa:4335094%09red/osa:4350502%09red/osa:4329723%09red/osa:4329722%09red/osa:4329724%09red
Phenylpropanoid biosynthesis	KEGG PATHWAY	osa00940	29	125	0.000413481	0.00992354	LOC_Os08g02110|LOC_Os08g34280|LOC_Os01g40870|LOC_Os05g06970|LOC_Os01g22370|LOC_Os05g35290|LOC_Os01g73170|LOC_Os06g46799|LOC_Os05g25640|LOC_Os02g08100|LOC_Os04g59150|LOC_Os05g30350|LOC_Os10g36848|LOC_Os09g33680|LOC_Os04g39880|LOC_Os02g09490|LOC_Os02g39850|LOC_Os10g02070|LOC_Os03g13210|LOC_Os08g34790|LOC_Os07g44440|LOC_Os02g26810|LOC_Os09g23560|LOC_Os03g53800|LOC_Os05g30280|LOC_Os04g43800|LOC_Os04g…	osa:4344496|osa:4345689|osa:4326376|osa:4337892|osa:4326970|osa:4338861|osa:4324554|osa:4341861|osa:4338409|osa:4328485|osa:4337482|osa:4338560|osa:4349097|osa:4347545|osa:4336146|osa:4328552|osa:4329959|osa:4347963|osa:4332175|osa:4345717|osa:4344046|osa:4329329|osa:4346993|osa:4334114|osa:4338556|osa:4336415|osa:4335223|osa:4338558|osa:4349585|	4344496|4345689|4326376|4337892|4326970|4338861|4324554|4341861|4338409|4328485|4337482|4338560|4349097|4347545|4336146|4328552|4329959|4347963|4332175|4345717|4344046|4329329|4346993|4334114|4338556|4336415|4335223|4338558|4349585|	http://www.genome.jp/kegg-bin/show_pathway?osa00940/osa:4337892%09red/osa:4349585%09red/osa:4338560%09red/osa:4347963%09red/osa:4324554%09red/osa:4329959%09red/osa:4345717%09red/osa:4347545%09red/osa:4326376%09red/osa:4349097%09red/osa:4328552%09red/osa:4336146%09red/osa:4336415%09red/osa:4332175%09red/osa:4337482%09red/osa:4338556%09red/osa:4338558%09red/osa:4338861%09red/osa:4329329%09red/osa:4…
Biosynthesis of secondary metabolites	KEGG PATHWAY	osa01110	116	779	0.000760295	0.0145977	LOC_Os02g01890|LOC_Os04g09900|LOC_Os05g25640|LOC_Os03g12890|LOC_Os09g20440|LOC_Os03g08999|LOC_Os10g25040|LOC_Os01g70170|LOC_Os06g04280|LOC_Os02g36140|LOC_Os01g02880|LOC_Os09g08130|LOC_Os03g13210|LOC_Os04g57540|LOC_Os02g11070|LOC_Os02g44000|LOC_Os08g04560|LOC_Os07g39270|LOC_Os05g05670|LOC_Os07g09190|LOC_Os05g30300|LOC_Os02g36070|LOC_Os04g52730|LOC_Os01g22010|LOC_Os11g10980|LOC_Os08g02110|LOC_Os08g…	osa:4349111|osa:4335090|osa:4338409|osa:4332151|osa:4346890|osa:4331893|osa:4348519|osa:4327239|osa:4340026|osa:4329724|osa:4326074|osa:4346529|osa:4332175|osa:4331502|osa:4328676|osa:4336590|osa:4344637|osa:4343721|osa:4337818|osa:4342614|osa:4338558|osa:4329722|osa:4337011|osa:4337733|osa:4350078|osa:4344496|osa:4345689|osa:4352248|osa:4335091|osa:4341861|osa:4337482|osa:4329889|osa:4347614|osa…	4349111|4335090|4338409|4332151|4346890|4331893|4348519|4327239|4340026|4329724|4326074|4346529|4332175|4331502|4328676|4336590|4344637|4343721|4337818|4342614|4338558|4329722|4337011|4337733|4350078|4344496|4345689|4352248|4335091|4341861|4337482|4329889|4347614|4336146|4328552|4351493|4350054|4329724|4346993|4334114|4338556|4344612|4328481|4329723|4349970|4341447|4348804|4336039|4339812|4339684…	http://www.genome.jp/kegg-bin/show_pathway?osa01110/osa:4349585%09red/osa:4324263%09red/osa:4347963%09red/osa:4341861%09red/osa:4346651%09red/osa:4329959%09red/osa:4346017%09red/osa:4324066%09red/osa:4347545%09red/osa:4340547%09red/osa:4336146%09red/osa:4325621%09red/osa:4336415%09red/osa:4338718%09red/osa:4338556%09red/osa:4327301%09red/osa:4348299%09red/osa:4338558%09red/osa:4326970%09red/osa:4…
Biosynthesis of unsaturated fatty acids	KEGG PATHWAY	osa01040	12	40	0.00374956	0.059993	LOC_Os07g23390|LOC_Os08g10010|LOC_Os07g23410|LOC_Os05g07090|LOC_Os11g39220|LOC_Os07g23430|LOC_Os07g07440|LOC_Os03g30950|LOC_Os06g23760|LOC_Os06g23780|LOC_Os03g53010|LOC_Os10g31950	osa:4343026|osa:4344897|osa:4343026|osa:4337904|osa:4340986|osa:4343027|osa:4342507|osa:4333144|osa:4324062|osa:4340972|osa:4344897|osa:4348804|	4343026|4344897|4343026|4337904|4340986|4343027|4342507|4333144|4324062|4340972|4344897|4348804|	http://www.genome.jp/kegg-bin/show_pathway?osa01040/osa:4340986%09red/osa:4342507%09red/osa:4337904%09red/osa:4340972%09red/osa:4348804%09red/osa:4344897%09red/osa:4343026%09red/osa:4343027%09red/osa:4333144%09red/osa:4324062%09red
Phenylalanine, tyrosine and tryptophan biosynthesis	KEGG PATHWAY	osa00400	12	42	0.00519455	0.0712396	LOC_Os06g12150|LOC_Os06g04280|LOC_Os04g33390|LOC_Os03g50880|LOC_Os01g65090|LOC_Os09g08130|LOC_Os07g08430|LOC_Os04g38950|LOC_Os08g23150|LOC_Os01g55540|LOC_Os06g35540|LOC_Os08g04180	osa:4340547|osa:4340026|osa:4335756|osa:4333918|osa:4324941|osa:4346529|osa:4342571|osa:4333918|osa:4346529|osa:4325621|osa:4341252|osa:4344612|	4340547|4340026|4335756|4333918|4324941|4346529|4342571|4333918|4346529|4325621|4341252|4344612|	http://www.genome.jp/kegg-bin/show_pathway?osa00400/osa:4340026%09red/osa:4344612%09red/osa:4346529%09red/osa:4341252%09red/osa:4340547%09red/osa:4342571%09red/osa:4333918%09red/osa:4324941%09red/osa:4325621%09red/osa:4335756%09red
Phenylalanine metabolism	KEGG PATHWAY	osa00360	20	99	0.0113053	0.12245	LOC_Os08g02110|LOC_Os05g06970|LOC_Os01g65090|LOC_Os10g02070|LOC_Os04g43800|LOC_Os05g25640|LOC_Os06g23114|LOC_Os04g59150|LOC_Os01g22370|LOC_Os03g13210|LOC_Os02g26810|LOC_Os06g46799|LOC_Os08g34790|LOC_Os02g08100|LOC_Os01g55540|LOC_Os06g35540|LOC_Os05g35290|LOC_Os01g73170|LOC_Os12g02060|LOC_Os07g44440	osa:4344496|osa:4337892|osa:4324941|osa:4347963|osa:4336415|osa:4338409|osa:4340945|osa:4337482|osa:4326970|osa:4332175|osa:4329329|osa:4341861|osa:4345717|osa:4328485|osa:4325621|osa:4341252|osa:4338861|osa:4324554|osa:4349585|osa:4344046|	4344496|4337892|4324941|4347963|4336415|4338409|4340945|4337482|4326970|4332175|4329329|4341861|4345717|4328485|4325621|4341252|4338861|4324554|4349585|4344046|	http://www.genome.jp/kegg-bin/show_pathway?osa00360/osa:4337892%09red/osa:4337482%09red/osa:4329329%09red/osa:4349585%09red/osa:4328485%09red/osa:4341252%09red/osa:4332175%09red/osa:4344496%09red/osa:4324554%09red/osa:4340945%09red/osa:4326970%09red/osa:4347963%09red/osa:4345717%09red/osa:4341861%09red/osa:4338409%09red/osa:4338861%09red/osa:4325621%09red/osa:4336415%09red/osa:4344046%09red/osa:4…
Glutathione metabolism	KEGG PATHWAY	osa00480	17	80	0.0125239	0.12245	LOC_Os10g38470|LOC_Os05g05620|LOC_Os01g72140|LOC_Os12g24650|LOC_Os10g38740|LOC_Os02g38840|LOC_Os01g27210|LOC_Os03g17480|LOC_Os03g17460|LOC_Os02g56850|LOC_Os01g72120|LOC_Os01g72130|LOC_Os10g28000|LOC_Os01g27340|LOC_Os10g38360|LOC_Os04g35520|LOC_Os01g72160	osa:4349187|osa:4337813|osa:4325764|osa:4352123|osa:4349207|osa:4329889|osa:4325704|osa:4332456|osa:4332454|osa:4331112|osa:4325763|osa:9269614|osa:4348623|osa:4325710|osa:4349185|osa:4335896|osa:4325766|	4349187|4337813|4325764|4352123|4349207|4329889|4325704|4332456|4332454|4331112|4325763|9269614|4348623|4325710|4349185|4335896|4325766|	http://www.genome.jp/kegg-bin/show_pathway?osa00480/osa:4331112%09red/osa:9269614%09red/osa:4337813%09red/osa:4349185%09red/osa:4325704%09red/osa:4325710%09red/osa:4325766%09red/osa:4348623%09red/osa:4352123%09red/osa:4349187%09red/osa:4332456%09red/osa:4325763%09red/osa:4332454%09red/osa:4329889%09red/osa:4349207%09red/osa:4335896%09red/osa:4325764%09red
Linoleic acid metabolism	KEGG PATHWAY	osa00591	6	15	0.0130435	0.12245	LOC_Os11g47790|LOC_Os08g39850|LOC_Os03g08220|LOC_Os04g37430|LOC_Os08g39840|LOC_Os03g49380	osa:4334049|osa:4345994|osa:4331824|osa:4331824|osa:4345993|osa:4333823|	4334049|4345994|4331824|4331824|4345993|4333823|	http://www.genome.jp/kegg-bin/show_pathway?osa00591/osa:4345993%09red/osa:4333823%09red/osa:4331824%09red/osa:4345994%09red/osa:4334049%09red
Tyrosine metabolism	KEGG PATHWAY	osa00350	10	37	0.0140308	0.12245	LOC_Os03g30800|LOC_Os08g04540|LOC_Os11g14040|LOC_Os11g10510|LOC_Os01g65090|LOC_Os03g08999|LOC_Os06g23114|LOC_Os01g55540|LOC_Os06g35540|LOC_Os08g04560	osa:4334655|osa:4344636|osa:4329692|osa:4350054|osa:4324941|osa:4331893|osa:4340945|osa:4325621|osa:4341252|osa:4344637|	4334655|4344636|4329692|4350054|4324941|4331893|4340945|4325621|4341252|4344637|	http://www.genome.jp/kegg-bin/show_pathway?osa00350/osa:4344637%09red/osa:4350054%09red/osa:4331893%09red/osa:4344636%09red/osa:4341252%09red/osa:4334655%09red/osa:4340945%09red/osa:4324941%09red/osa:4325621%09red/osa:4329692%09red
Stilbenoid, diarylheptanoid and gingerol biosynthesis	KEGG PATHWAY	osa00945	6	18	0.0251317	0.186099	LOC_Os02g39850|LOC_Os10g37120|LOC_Os03g55240|LOC_Os05g25640|LOC_Os02g26810|LOC_Os02g01890	osa:4329959|osa:4349111|osa:4334183|osa:4338409|osa:4329329|osa:4349111|	4329959|4349111|4334183|4338409|4329329|4349111|	http://www.genome.jp/kegg-bin/show_pathway?osa00945/osa:4338409%09red/osa:4334183%09red/osa:4329959%09red/osa:4329329%09red/osa:4349111%09red
Galactose metabolism	KEGG PATHWAY	osa00052	12	54	0.0252009	0.186099	LOC_Os05g51670|LOC_Os04g56920|LOC_Os04g45290|LOC_Os06g46340|LOC_Os05g10650|LOC_Os01g07530|LOC_Os01g09570|LOC_Os09g15420|LOC_Os02g33110|LOC_Os10g26570|LOC_Os04g38540|LOC_Os04g56930	osa:4339812|osa:4337312|osa:4336515|osa:4341833|osa:4327301|osa:4325200|osa:4327301|osa:4346723|osa:4329561|osa:4348582|osa:4336039|osa:4337313|	4339812|4337312|4336515|4341833|4327301|4325200|4327301|4346723|4329561|4348582|4336039|4337313|	http://www.genome.jp/kegg-bin/show_pathway?osa00052/osa:4336515%09red/osa:4337313%09red/osa:4337312%09red/osa:4325200%09red/osa:4339812%09red/osa:4327301%09red/osa:4336039%09red/osa:4346723%09red/osa:4329561%09red/osa:4348582%09red/osa:4341833%09red
Isoquinoline alkaloid biosynthesis	KEGG PATHWAY	osa00950	6	20	0.0363664	0.241155	LOC_Os08g04540|LOC_Os06g23114|LOC_Os01g65090|LOC_Os01g55540|LOC_Os06g35540|LOC_Os08g04560	osa:4344636|osa:4340945|osa:4324941|osa:4325621|osa:4341252|osa:4344637|	4344636|4340945|4324941|4325621|4341252|4344637|	http://www.genome.jp/kegg-bin/show_pathway?osa00950/osa:4340945%09red/osa:4344636%09red/osa:4341252%09red/osa:4344637%09red/osa:4324941%09red/osa:4325621%09red
Fatty acid metabolism	KEGG PATHWAY	osa01212	14	72	0.039194	0.241155	LOC_Os07g23390|LOC_Os06g05130|LOC_Os08g10010|LOC_Os07g23410|LOC_Os05g07090|LOC_Os11g39220|LOC_Os07g23430|LOC_Os07g07440|LOC_Os06g06350|LOC_Os03g30950|LOC_Os06g23760|LOC_Os06g23780|LOC_Os03g53010|LOC_Os10g31950	osa:4343026|osa:4340093|osa:4344897|osa:4343026|osa:4337904|osa:4340986|osa:4343027|osa:4342507|osa:4340187|osa:4333144|osa:4324062|osa:4340972|osa:4344897|osa:4348804|	4343026|4340093|4344897|4343026|4337904|4340986|4343027|4342507|4340187|4333144|4324062|4340972|4344897|4348804|	http://www.genome.jp/kegg-bin/show_pathway?osa01212/osa:4340093%09red/osa:4340986%09red/osa:4342507%09red/osa:4337904%09red/osa:4340972%09red/osa:4348804%09red/osa:4344897%09red/osa:4343026%09red/osa:4343027%09red/osa:4333144%09red/osa:4324062%09red/osa:4340187%09red
Starch and sucrose metabolism	KEGG PATHWAY	osa00500	24	145	0.0401925	0.241155	LOC_Os02g54890|LOC_Os04g45290|LOC_Os02g33110|LOC_Os01g57854|LOC_Os06g46340|LOC_Os03g28330|LOC_Os05g30350|LOC_Os05g50380|LOC_Os06g11840|LOC_Os07g43160|LOC_Os08g41440|LOC_Os09g33680|LOC_Os04g39880|LOC_Os09g28420|LOC_Os04g56920|LOC_Os10g41550|LOC_Os10g40550|LOC_Os09g20990|LOC_Os03g53800|LOC_Os05g30280|LOC_Os03g26910|LOC_Os05g30300|LOC_Os08g34580|LOC_Os04g56930	osa:4330975|osa:4336515|osa:4329561|osa:4325861|osa:4341833|osa:4333062|osa:4338560|osa:4339718|osa:4340524|osa:4343959|osa:4346094|osa:4347545|osa:4336146|osa:4347265|osa:4337312|osa:4349417|osa:4349333|osa:4345573|osa:4334114|osa:4338556|osa:4332996|osa:4338558|osa:4345706|osa:4337313|	4330975|4336515|4329561|4325861|4341833|4333062|4338560|4339718|4340524|4343959|4346094|4347545|4336146|4347265|4337312|4349417|4349333|4345573|4334114|4338556|4332996|4338558|4345706|4337313|	http://www.genome.jp/kegg-bin/show_pathway?osa00500/osa:4337313%09red/osa:4337312%09red/osa:4338560%09red/osa:4346094%09red/osa:4330975%09red/osa:4345573%09red/osa:4332996%09red/osa:4347545%09red/osa:4349417%09red/osa:4329561%09red/osa:4325861%09red/osa:4336515%09red/osa:4338556%09red/osa:4336146%09red/osa:4338558%09red/osa:4345706%09red/osa:4347265%09red/osa:4340524%09red/osa:4333062%09red/osa:4…
Alanine, aspartate and glutamate metabolism	KEGG PATHWAY	osa00250	9	41	0.0515799	0.291275	LOC_Os03g12290|LOC_Os02g04170|LOC_Os11g03900|LOC_Os10g25130|LOC_Os04g45970|LOC_Os12g03720|LOC_Os03g13300|LOC_Os01g55540|LOC_Os06g35540	osa:4332108|osa:4328220|osa:4351413|osa:4348524|osa:4330164|osa:4351413|osa:4332184|osa:4325621|osa:4341252|	4332108|4328220|4351413|4348524|4330164|4351413|4332184|4325621|4341252|	http://www.genome.jp/kegg-bin/show_pathway?osa00250/osa:4348524%09red/osa:4330164%09red/osa:4328220%09red/osa:4341252%09red/osa:4351413%09red/osa:4332184%09red/osa:4332108%09red/osa:4325621%09red
Biosynthesis of amino acids	KEGG PATHWAY	osa01230	31	207	0.0607191	0.323835	LOC_Os01g55540|LOC_Os08g34720|LOC_Os03g12890|LOC_Os01g09570|LOC_Os02g12900|LOC_Os08g23150|LOC_Os06g05700|LOC_Os03g12290|LOC_Os05g10650|LOC_Os12g42980|LOC_Os01g70170|LOC_Os07g08430|LOC_Os03g50880|LOC_Os12g05110|LOC_Os01g02880|LOC_Os06g04280|LOC_Os01g65090|LOC_Os09g08130|LOC_Os04g38950|LOC_Os10g26570|LOC_Os04g33390|LOC_Os01g58610|LOC_Os02g44000|LOC_Os06g12150|LOC_Os08g04180|LOC_Os10g25130|LOC_Os05g…	osa:4325621|osa:4337230|osa:4332151|osa:4327301|osa:4341321|osa:4346529|osa:4340142|osa:4332108|osa:4327301|osa:4352839|osa:4327239|osa:4342571|osa:4333918|osa:4351493|osa:4326074|osa:4340026|osa:4324941|osa:4346529|osa:4333918|osa:4348582|osa:4335756|osa:9268592|osa:4336590|osa:4340547|osa:4344612|osa:4348524|osa:4325027|osa:4324263|osa:4341252|osa:4337733|osa:4350078|	4325621|4337230|4332151|4327301|4341321|4346529|4340142|4332108|4327301|4352839|4327239|4342571|4333918|4351493|4326074|4340026|4324941|4346529|4333918|4348582|4335756|9268592|4336590|4340547|4344612|4348524|4325027|4324263|4341252|4337733|4350078|	http://www.genome.jp/kegg-bin/show_pathway?osa01230/osa:4337230%09red/osa:4346529%09red/osa:4324263%09red/osa:4327239%09red/osa:4342571%09red/osa:4352839%09red/osa:4348582%09red/osa:4326074%09red/osa:4337733%09red/osa:4336590%09red/osa:4340547%09red/osa:4325027%09red/osa:4341321%09red/osa:4348524%09red/osa:4332151%09red/osa:4344612%09red/osa:4327301%09red/osa:4350078%09red/osa:4351493%09red/osa:9…
Degradation of aromatic compounds	KEGG PATHWAY	osa01220	4	12	0.0641831	0.324294	LOC_Os11g10510|LOC_Os03g08999|LOC_Os02g26810|LOC_Os05g25640	osa:4350054|osa:4331893|osa:4329329|osa:4338409|	4350054|4331893|4329329|4338409|	http://www.genome.jp/kegg-bin/show_pathway?osa01220/osa:4338409%09red/osa:4350054%09red/osa:4329329%09red/osa:4331893%09red
Flavonoid biosynthesis	KEGG PATHWAY	osa00941	5	19	0.0791615	0.379975	LOC_Os10g16974|LOC_Os02g39850|LOC_Os02g26810|LOC_Os05g25640|LOC_Os04g53850	osa:4348299|osa:4329959|osa:4329329|osa:4338409|osa:4337100|	4348299|4329959|4329329|4338409|4337100|	http://www.genome.jp/kegg-bin/show_pathway?osa00941/osa:4338409%09red/osa:4337100%09red/osa:4329959%09red/osa:4329329%09red/osa:4348299%09red
Fatty acid degradation	KEGG PATHWAY	osa00071	8	41	0.101904	0.465845	LOC_Os11g10510|LOC_Os05g07090|LOC_Os11g39220|LOC_Os06g06350|LOC_Os03g08999|LOC_Os06g23760|LOC_Os06g23780|LOC_Os10g31950	osa:4350054|osa:4337904|osa:4340986|osa:4340187|osa:4331893|osa:4324062|osa:4340972|osa:4348804|	4350054|4337904|4340986|4340187|4331893|4324062|4340972|4348804|	http://www.genome.jp/kegg-bin/show_pathway?osa00071/osa:4340986%09red/osa:4350054%09red/osa:4331893%09red/osa:4337904%09red/osa:4340972%09red/osa:4348804%09red/osa:4324062%09red/osa:4340187%09red
Tropane, piperidine and pyridine alkaloid biosynthesis	KEGG PATHWAY	osa00960	4	16	0.125614	0.548134	LOC_Os01g65090|LOC_Os06g23114|LOC_Os01g55540|LOC_Os06g35540	osa:4324941|osa:4340945|osa:4325621|osa:4341252|	4324941|4340945|4325621|4341252|	http://www.genome.jp/kegg-bin/show_pathway?osa00960/osa:4325621%09red/osa:4341252%09red/osa:4340945%09red/osa:4324941%09red
Fructose and mannose metabolism	KEGG PATHWAY	osa00051	9	53	0.149193	0.622717	LOC_Os06g44270|LOC_Os05g10650|LOC_Os01g03710|LOC_Os01g09570|LOC_Os01g02880|LOC_Os05g33380|LOC_Os10g26570|LOC_Os11g38810|LOC_Os03g18310	osa:4341699|osa:4327301|osa:4325991|osa:4327301|osa:4326074|osa:4325027|osa:4348582|osa:4325991|osa:4332523|	4341699|4327301|4325991|4327301|4326074|4325027|4348582|4325991|4332523|	http://www.genome.jp/kegg-bin/show_pathway?osa00051/osa:4341699%09red/osa:4348582%09red/osa:4326074%09red/osa:4327301%09red/osa:4325027%09red/osa:4325991%09red/osa:4332523%09red
Glycolysis / Gluconeogenesis	KEGG PATHWAY	osa00010	17	119	0.176454	0.685345	LOC_Os12g05110|LOC_Os10g33980|LOC_Os05g10650|LOC_Os02g08030|LOC_Os02g32490|LOC_Os11g10510|LOC_Os01g09570|LOC_Os01g02880|LOC_Os05g33380|LOC_Os10g26570|LOC_Os03g08999|LOC_Os04g38540|LOC_Os04g33190|LOC_Os01g58610|LOC_Os01g16960|LOC_Os11g10980|LOC_Os01g06660	osa:4351493|osa:4344382|osa:4327301|osa:4328481|osa:4329518|osa:4350054|osa:4327301|osa:4326074|osa:4325027|osa:4348582|osa:4331893|osa:4336039|osa:4329518|osa:9268592|osa:4324263|osa:4350078|osa:4324066|	4351493|4344382|4327301|4328481|4329518|4350054|4327301|4326074|4325027|4348582|4331893|4336039|4329518|9268592|4324263|4350078|4324066|	http://www.genome.jp/kegg-bin/show_pathway?osa00010/osa:4324263%09red/osa:9268592%09red/osa:4329518%09red/osa:4326074%09red/osa:4327301%09red/osa:4350078%09red/osa:4336039%09red/osa:4331893%09red/osa:4351493%09red/osa:4344382%09red/osa:4328481%09red/osa:4348582%09red/osa:4325027%09red/osa:4324066%09red/osa:4350054%09red
Pentose phosphate pathway	KEGG PATHWAY	osa00030	8	48	0.178475	0.685345	LOC_Os05g10650|LOC_Os02g38840|LOC_Os01g09570|LOC_Os01g02880|LOC_Os05g33380|LOC_Os08g43370|LOC_Os10g26570|LOC_Os01g70170	osa:4327301|osa:4329889|osa:4327301|osa:4326074|osa:4325027|osa:4346232|osa:4348582|osa:4327239|	4327301|4329889|4327301|4326074|4325027|4346232|4348582|4327239|	http://www.genome.jp/kegg-bin/show_pathway?osa00030/osa:4346232%09red/osa:4329889%09red/osa:4348582%09red/osa:4326074%09red/osa:4327301%09red/osa:4327239%09red/osa:4325027%09red
Nicotinate and nicotinamide metabolism	KEGG PATHWAY	osa00760	3	13	0.202095	0.717877	LOC_Os09g39440|LOC_Os08g44370|LOC_Os02g04170	osa:4347891|osa:4346302|osa:4328220|	4347891|4346302|4328220|	http://www.genome.jp/kegg-bin/show_pathway?osa00760/osa:4346302%09red/osa:4328220%09red/osa:4347891%09red
Phosphatidylinositol signaling system	KEGG PATHWAY	osa04070	7	43	0.214355	0.717877	LOC_Os03g20370|LOC_Os03g53200|LOC_Os07g48780|LOC_Os02g32370|LOC_Os12g37560|LOC_Os12g08270|LOC_Os03g18010	osa:4344344|osa:4334072|osa:4344344|osa:4329509|osa:4332497|osa:4351685|osa:4332497|	4344344|4334072|4344344|4329509|4332497|4351685|4332497|	http://www.genome.jp/kegg-bin/show_pathway?osa04070/osa:4332497%09red/osa:4334072%09red/osa:4344344%09red/osa:4351685%09red/osa:4329509%09red
Cyanoamino acid metabolism	KEGG PATHWAY	osa00460	6	36	0.225159	0.717877	LOC_Os03g53800|LOC_Os05g30280|LOC_Os05g30350|LOC_Os09g33680|LOC_Os04g39880|LOC_Os05g30300	osa:4334114|osa:4338556|osa:4338560|osa:4347545|osa:4336146|osa:4338558|	4334114|4338556|4338560|4347545|4336146|4338558|	http://www.genome.jp/kegg-bin/show_pathway?osa00460/osa:4347545%09red/osa:4338556%09red/osa:4338558%09red/osa:4338560%09red/osa:4336146%09red/osa:4334114%09red
Limonene and pinene degradation	KEGG PATHWAY	osa00903	3	14	0.228756	0.717877	LOC_Os10g37120|LOC_Os03g55240|LOC_Os02g01890	osa:4349111|osa:4334183|osa:4349111|	4349111|4334183|4349111|	http://www.genome.jp/kegg-bin/show_pathway?osa00903/osa:4334183%09red/osa:4349111%09red
Zeatin biosynthesis	KEGG PATHWAY	osa00908	3	14	0.228756	0.717877	LOC_Os01g10110|LOC_Os10g34230|LOC_Os05g24660	osa:4327887|osa:4348932|osa:4334529|	4327887|4348932|4334529|	http://www.genome.jp/kegg-bin/show_pathway?osa00908/osa:4348932%09red/osa:4334529%09red/osa:4327887%09red
Cysteine and methionine metabolism	KEGG PATHWAY	osa00270	12	85	0.239137	0.717877	LOC_Os10g28350|LOC_Os04g48850|LOC_Os05g05680|LOC_Os12g42980|LOC_Os06g05700|LOC_Os02g12900|LOC_Os05g05670|LOC_Os11g08380|LOC_Os01g55540|LOC_Os06g35540|LOC_Os01g22010|LOC_Os01g39860	osa:4348646|osa:4336750|osa:4337818|osa:4352839|osa:4340142|osa:4341321|osa:4337818|osa:4349970|osa:4325621|osa:4341252|osa:4337733|osa:4324194|	4348646|4336750|4337818|4352839|4340142|4341321|4337818|4349970|4325621|4341252|4337733|4324194|	http://www.genome.jp/kegg-bin/show_pathway?osa00270/osa:4337818%09red/osa:4336750%09red/osa:4348646%09red/osa:4337733%09red/osa:4341252%09red/osa:4340142%09red/osa:4349970%09red/osa:4352839%09red/osa:4325621%09red/osa:4341321%09red/osa:4324194%09red
Peroxisome	KEGG PATHWAY	osa04146	11	78	0.252904	0.717877	LOC_Os05g07090|LOC_Os08g45210|LOC_Os07g23340|LOC_Os10g31950|LOC_Os06g06350|LOC_Os03g57210|LOC_Os03g15860|LOC_Os06g23760|LOC_Os06g23780|LOC_Os11g39220|LOC_Os07g23380	osa:4337904|osa:4346360|osa:4335562|osa:4348804|osa:4340187|osa:4334348|osa:4332347|osa:4324062|osa:4340972|osa:4340986|osa:4335559|	4337904|4346360|4335562|4348804|4340187|4334348|4332347|4324062|4340972|4340986|4335559|	http://www.genome.jp/kegg-bin/show_pathway?osa04146/osa:4340986%09red/osa:4337904%09red/osa:4340972%09red/osa:4334348%09red/osa:4335562%09red/osa:4324062%09red/osa:4346360%09red/osa:4348804%09red/osa:4335559%09red/osa:4340187%09red/osa:4332347%09red
Metabolic pathways	KEGG PATHWAY	osa01100	177	1549	0.253783	0.717877	LOC_Os02g33110|LOC_Os06g29220|LOC_Os05g07090|LOC_Os01g02890|LOC_Os06g06350|LOC_Os06g11240|LOC_Os08g39850|LOC_Os02g01890|LOC_Os03g58890|LOC_Os06g46340|LOC_Os10g38060|LOC_Os06g11210|LOC_Os09g20440|LOC_Os03g08999|LOC_Os02g32370|Novel00882|LOC_Os01g70170|LOC_Os12g07140|LOC_Os06g04280|LOC_Os11g38810|LOC_Os01g02880|LOC_Os09g08130|LOC_Os03g13210|LOC_Os04g57540|LOC_Os08g44340|LOC_Os12g37560|LOC_Os10g4055…	osa:4329561|osa:4341070|osa:4337904|osa:4339554|osa:4340187|osa:4340486|osa:4345994|osa:4349111|osa:4334477|osa:4341833|osa:4349161|osa:4340485|osa:4346890|osa:4331893|osa:4329509|osa:4336292|osa:4327239|osa:4351612|osa:4340026|osa:4325991|osa:4326074|osa:4346529|osa:4332175|osa:4331502|osa:4346299|osa:4332497|osa:4349333|osa:4340972|osa:4336590|osa:4344637|osa:4340093|osa:4343721|osa:4329733|osa…	4329561|4341070|4337904|4339554|4340187|4340486|4345994|4349111|4334477|4341833|4349161|4340485|4346890|4331893|4329509|4336292|4327239|4351612|4340026|4325991|4326074|4346529|4332175|4331502|4346299|4332497|4349333|4340972|4336590|4344637|4340093|4343721|4329733|4337818|4342614|4338558|4337011|4345706|4350078|4346529|4344496|4341699|4336515|4345689|4337230|9268154|4330164|4337206|4342642|4342990…	http://www.genome.jp/kegg-bin/show_pathway?osa01100/osa:4337313%09red/osa:4337312%09red/osa:4349585%09red/osa:4324263%09red/osa:4346094%09red/osa:4347963%09red/osa:4341861%09red/osa:4346651%09red/osa:4329959%09red/osa:4346017%09red/osa:4334477%09red/osa:4324066%09red/osa:4347545%09red/osa:4324062%09red/osa:4351685%09red/osa:4340547%09red/osa:4336146%09red/osa:4325621%09red/osa:4336415%09red/osa:4…
Amino sugar and nucleotide sugar metabolism	KEGG PATHWAY	osa00520	14	103	0.254248	0.717877	LOC_Os02g54890|LOC_Os06g44270|LOC_Os11g03900|LOC_Os01g49320|LOC_Os05g51670|LOC_Os05g50380|LOC_Os01g03710|LOC_Os01g47070|LOC_Os09g15420|LOC_Os12g03720|LOC_Os08g41440|LOC_Os11g38810|LOC_Os04g52730|LOC_Os05g33130	osa:4330975|osa:4341699|osa:4351413|osa:4324117|osa:4339812|osa:4339718|osa:4325991|osa:4327172|osa:4346723|osa:4351413|osa:4346094|osa:4325991|osa:4337011|osa:4338718|	4330975|4341699|4351413|4324117|4339812|4339718|4325991|4327172|4346723|4351413|4346094|4325991|4337011|4338718|	http://www.genome.jp/kegg-bin/show_pathway?osa00520/osa:4341699%09red/osa:4338718%09red/osa:4346094%09red/osa:4324117%09red/osa:4339812%09red/osa:4351413%09red/osa:4327172%09red/osa:4346723%09red/osa:4330975%09red/osa:4337011%09red/osa:4339718%09red/osa:4325991%09red
Arginine and proline metabolism	KEGG PATHWAY	osa00330	9	63	0.270914	0.743077	LOC_Os03g12290|LOC_Os07g09630|LOC_Os03g58890|LOC_Os10g40360|LOC_Os04g45970|LOC_Os01g55540|LOC_Os06g35540|LOC_Os06g04070|LOC_Os02g44000	osa:4332108|osa:4342642|osa:4334477|osa:4349318|osa:4330164|osa:4325621|osa:4341252|osa:4340008|osa:4336590|	4332108|4342642|4334477|4349318|4330164|4325621|4341252|4340008|4336590|	http://www.genome.jp/kegg-bin/show_pathway?osa00330/osa:4330164%09red/osa:4349318%09red/osa:4341252%09red/osa:4336590%09red/osa:4340008%09red/osa:4342642%09red/osa:4332108%09red/osa:4334477%09red/osa:4325621%09red
Fatty acid biosynthesis	KEGG PATHWAY	osa00061	6	40	0.293474	0.782597	LOC_Os06g05130|LOC_Os08g10010|LOC_Os07g07440|LOC_Os06g06350|LOC_Os03g30950|LOC_Os03g53010	osa:4340093|osa:4344897|osa:4342507|osa:4340187|osa:4333144|osa:4344897|	4340093|4344897|4342507|4340187|4333144|4344897|	http://www.genome.jp/kegg-bin/show_pathway?osa00061/osa:4333144%09red/osa:4340093%09red/osa:4344897%09red/osa:4340187%09red/osa:4342507%09red
Cutin, suberine and wax biosynthesis	KEGG PATHWAY	osa00073	3	17	0.311575	0.808411	LOC_Os02g40784|LOC_Os07g23340|LOC_Os07g23380	osa:4330012|osa:4335562|osa:4335559|	4330012|4335562|4335559|	http://www.genome.jp/kegg-bin/show_pathway?osa00073/osa:4335562%09red/osa:4335559%09red/osa:4330012%09red
Thiamine metabolism	KEGG PATHWAY	osa00730	2	10	0.331749	0.838103	LOC_Os05g30454|LOC_Os07g09190	osa:4338566|osa:4342614|	4338566|4342614|	http://www.genome.jp/kegg-bin/show_pathway?osa00730/osa:4342614%09red/osa:4338566%09red
Carbon metabolism	KEGG PATHWAY	osa01200	27	225	0.340562	0.838305	LOC_Os08g34720|LOC_Os06g29220|LOC_Os01g09570|LOC_Os02g12900|LOC_Os06g05700|LOC_Os05g10650|LOC_Os12g42980|LOC_Os02g38840|LOC_Os09g20440|LOC_Os03g08999|LOC_Os05g09440|LOC_Os04g33190|LOC_Os01g70170|LOC_Os12g05110|LOC_Os01g02880|LOC_Os03g21950|LOC_Os08g43370|LOC_Os10g26570|LOC_Os02g32490|LOC_Os01g55540|LOC_Os01g58610|LOC_Os10g25130|LOC_Os05g33380|LOC_Os01g16960|LOC_Os04g40990|LOC_Os06g35540|LOC_Os11g…	osa:4337230|osa:4341070|osa:4327301|osa:4341321|osa:4340142|osa:4327301|osa:4352839|osa:4329889|osa:4346890|osa:4331893|osa:4338007|osa:4329518|osa:4327239|osa:4351493|osa:4326074|osa:4332774|osa:4346232|osa:4348582|osa:4329518|osa:4325621|osa:9268592|osa:4348524|osa:4325027|osa:4324263|osa:9268154|osa:4341252|osa:4350078|	4337230|4341070|4327301|4341321|4340142|4327301|4352839|4329889|4346890|4331893|4338007|4329518|4327239|4351493|4326074|4332774|4346232|4348582|4329518|4325621|9268592|4348524|4325027|4324263|9268154|4341252|4350078|	http://www.genome.jp/kegg-bin/show_pathway?osa01200/osa:4337230%09red/osa:4324263%09red/osa:4327239%09red/osa:4352839%09red/osa:4346232%09red/osa:4348582%09red/osa:4326074%09red/osa:4331893%09red/osa:4338007%09red/osa:4325621%09red/osa:4341321%09red/osa:4348524%09red/osa:4327301%09red/osa:4350078%09red/osa:4346890%09red/osa:4341070%09red/osa:4351493%09red/osa:9268592%09red/osa:4332774%09red/osa:9…
Nitrogen metabolism	KEGG PATHWAY	osa00910	4	27	0.361429	0.867431	LOC_Os03g12290|LOC_Os08g36630|LOC_Os01g50820|LOC_Os04g45970	osa:4332108|osa:4345604|osa:4324249|osa:4330164|	4332108|4345604|4324249|4330164|	http://www.genome.jp/kegg-bin/show_pathway?osa00910/osa:4330164%09red/osa:4324249%09red/osa:4345604%09red/osa:4332108%09red
Inositol phosphate metabolism	KEGG PATHWAY	osa00562	6	45	0.383358	0.897619	LOC_Os06g36560|LOC_Os02g32370|LOC_Os12g37560|LOC_Os03g09250|LOC_Os12g08270|LOC_Os03g18010	osa:4341305|osa:4329509|osa:4332497|osa:4331917|osa:4351685|osa:4332497|	4341305|4329509|4332497|4331917|4351685|4332497|	http://www.genome.jp/kegg-bin/show_pathway?osa00562/osa:4331917%09red/osa:4332497%09red/osa:4341305%09red/osa:4351685%09red/osa:4329509%09red
Propanoate metabolism	KEGG PATHWAY	osa00640	2	14	0.474303	1	LOC_Os04g33190|LOC_Os02g32490	osa:4329518|osa:4329518|	4329518|4329518|	http://www.genome.jp/kegg-bin/show_pathway?osa00640/osa:4329518%09red
Ubiquinone and other terpenoid-quinone biosynthesis	KEGG PATHWAY	osa00130	4	32	0.47531	1	LOC_Os02g08100|LOC_Os02g26810|LOC_Os05g25640|LOC_Os08g34790	osa:4328485|osa:4329329|osa:4338409|osa:4345717|	4328485|4329329|4338409|4345717|	http://www.genome.jp/kegg-bin/show_pathway?osa00130/osa:4338409%09red/osa:4328485%09red/osa:4329329%09red/osa:4345717%09red
Pantothenate and CoA biosynthesis	KEGG PATHWAY	osa00770	3	24	0.501448	1	LOC_Os02g04120|LOC_Os12g03960|LOC_Os03g12890	osa:9271371|osa:4351429|osa:4332151|	9271371|4351429|4332151|	http://www.genome.jp/kegg-bin/show_pathway?osa00770/osa:4332151%09red/osa:9271371%09red/osa:4351429%09red
Glycerolipid metabolism	KEGG PATHWAY	osa00561	5	43	0.513037	1	LOC_Os04g55410|LOC_Os05g38350|LOC_Os04g34000|LOC_Os05g38710|LOC_Os02g33580	osa:4337206|osa:4338997|osa:4329584|osa:4339026|osa:4329584|	4337206|4338997|4329584|4339026|4329584|	http://www.genome.jp/kegg-bin/show_pathway?osa00561/osa:4337206%09red/osa:4329584%09red/osa:4338997%09red/osa:4339026%09red
Selenocompound metabolism	KEGG PATHWAY	osa00450	2	16	0.53842	1	LOC_Os10g26050|LOC_Os02g48290	osa:4348562|osa:4330505|	4348562|4330505|	http://www.genome.jp/kegg-bin/show_pathway?osa00450/osa:4348562%09red/osa:4330505%09red
Sulfur metabolism	KEGG PATHWAY	osa00920	4	35	0.539885	1	LOC_Os06g05700|LOC_Os02g12900|LOC_Os12g42980|LOC_Os12g08270	osa:4340142|osa:4341321|osa:4352839|osa:4351685|	4340142|4341321|4352839|4351685|	http://www.genome.jp/kegg-bin/show_pathway?osa00920/osa:4352839%09red/osa:4340142%09red/osa:4341321%09red/osa:4351685%09red
Synthesis and degradation of ketone bodies	KEGG PATHWAY	osa00072	1	7	0.561914	1	LOC_Os09g34960	osa:4347614|	4347614|	http://www.genome.jp/kegg-bin/show_pathway?osa00072/osa:4347614%09red
2-Oxocarboxylic acid metabolism	KEGG PATHWAY	osa01210	5	46	0.568571	1	LOC_Os10g25130|LOC_Os03g12890|LOC_Os02g44000|LOC_Os01g55540|LOC_Os06g35540	osa:4348524|osa:4332151|osa:4336590|osa:4325621|osa:4341252|	4348524|4332151|4336590|4325621|4341252|	http://www.genome.jp/kegg-bin/show_pathway?osa01210/osa:4348524%09red/osa:4325621%09red/osa:4341252%09red/osa:4336590%09red/osa:4332151%09red
Pyruvate metabolism	KEGG PATHWAY	osa00620	8	75	0.57417	1	LOC_Os12g05110|LOC_Os04g40990|LOC_Os03g21950|LOC_Os02g32490|LOC_Os05g09440|LOC_Os04g33190|LOC_Os01g16960|LOC_Os11g10980	osa:4351493|osa:9268154|osa:4332774|osa:4329518|osa:4338007|osa:4329518|osa:4324263|osa:4350078|	4351493|9268154|4332774|4329518|4338007|4329518|4324263|4350078|	http://www.genome.jp/kegg-bin/show_pathway?osa00620/osa:4329518%09red/osa:4350078%09red/osa:4324263%09red/osa:4338007%09red/osa:4351493%09red/osa:4332774%09red/osa:9268154%09red
Riboflavin metabolism	KEGG PATHWAY	osa00740	1	8	0.604877	1	LOC_Os02g36340	osa:4329733|	4329733|	http://www.genome.jp/kegg-bin/show_pathway?osa00740/osa:4329733%09red
Glycerophospholipid metabolism	KEGG PATHWAY	osa00564	7	68	0.611498	1	LOC_Os01g08760|LOC_Os10g38060|LOC_Os01g02890|LOC_Os05g45880|LOC_Os05g38350|LOC_Os05g38710|LOC_Os03g40670	osa:4325332|osa:4349161|osa:4339554|osa:9268113|osa:4338997|osa:4339026|osa:4333407|	4325332|4349161|4339554|9268113|4338997|4339026|4333407|	http://www.genome.jp/kegg-bin/show_pathway?osa00564/osa:4349161%09red/osa:4338997%09red/osa:4339026%09red/osa:4325332%09red/osa:9268113%09red/osa:4339554%09red/osa:4333407%09red
ABC transporters	KEGG PATHWAY	osa02010	1	9	0.64363	1	LOC_Os01g50160	osa:9268765|	9268765|	http://www.genome.jp/kegg-bin/show_pathway?osa02010/osa:9268765%09red
Brassinosteroid biosynthesis	KEGG PATHWAY	osa00905	1	9	0.64363	1	LOC_Os02g11020	osa:9268939|	9268939|	http://www.genome.jp/kegg-bin/show_pathway?osa00905/osa:9268939%09red
Butanoate metabolism	KEGG PATHWAY	osa00650	2	20	0.649679	1	LOC_Os09g34960|LOC_Os03g13300	osa:4347614|osa:4332184|	4347614|4332184|	http://www.genome.jp/kegg-bin/show_pathway?osa00650/osa:4332184%09red/osa:4347614%09red
Carbon fixation in photosynthetic organisms	KEGG PATHWAY	osa00710	7	77	0.728383	1	LOC_Os01g55540|LOC_Os10g25130|LOC_Os01g02880|LOC_Os05g33380|LOC_Os05g09440|LOC_Os06g35540|LOC_Os01g58610	osa:4325621|osa:4348524|osa:4326074|osa:4325027|osa:4338007|osa:4341252|osa:9268592|	4325621|4348524|4326074|4325027|4338007|4341252|9268592|	http://www.genome.jp/kegg-bin/show_pathway?osa00710/osa:4348524%09red/osa:4325621%09red/osa:4326074%09red/osa:4341252%09red/osa:4325027%09red/osa:4338007%09red/osa:9268592%09red
Fatty acid elongation	KEGG PATHWAY	osa00062	2	24	0.738533	1	LOC_Os02g11070|LOC_Os05g49900	osa:4328676|osa:4339684|	4328676|4339684|	http://www.genome.jp/kegg-bin/show_pathway?osa00062/osa:4328676%09red/osa:4339684%09red
Terpenoid backbone biosynthesis	KEGG PATHWAY	osa00900	4	47	0.749755	1	LOC_Os09g34960|LOC_Os02g48330|LOC_Os07g39270|LOC_Os07g09190	osa:4347614|osa:4346017|osa:4343721|osa:4342614|	4347614|4346017|4343721|4342614|	http://www.genome.jp/kegg-bin/show_pathway?osa00900/osa:4346017%09red/osa:4343721%09red/osa:4342614%09red/osa:4347614%09red
Ascorbate and aldarate metabolism	KEGG PATHWAY	osa00053	3	36	0.750066	1	LOC_Os06g36560|LOC_Os04g35520|LOC_Os08g44340	osa:4341305|osa:4335896|osa:4346299|	4341305|4335896|4346299|	http://www.genome.jp/kegg-bin/show_pathway?osa00053/osa:4346299%09red/osa:4341305%09red/osa:4335896%09red
Valine, leucine and isoleucine degradation	KEGG PATHWAY	osa00280	3	36	0.750066	1	LOC_Os09g34960|LOC_Os10g31950|LOC_Os03g12890	osa:4347614|osa:4348804|osa:4332151|	4347614|4348804|4332151|	http://www.genome.jp/kegg-bin/show_pathway?osa00280/osa:4332151%09red/osa:4347614%09red/osa:4348804%09red
SNARE interactions in vesicular transport	KEGG PATHWAY	osa04130	3	38	0.780028	1	LOC_Os12g44250|LOC_Os03g57310|LOC_Os06g07200	osa:4352920|osa:4334356|osa:4340257|	4352920|4334356|4340257|	http://www.genome.jp/kegg-bin/show_pathway?osa04130/osa:4334356%09red/osa:4340257%09red/osa:4352920%09red
Valine, leucine and isoleucine biosynthesis	KEGG PATHWAY	osa00290	1	14	0.787348	1	LOC_Os03g12890	osa:4332151|	4332151|	http://www.genome.jp/kegg-bin/show_pathway?osa00290/osa:4332151%09red
Proteasome	KEGG PATHWAY	osa03050	5	64	0.819256	1	LOC_Os08g41730|LOC_Os06g19730|LOC_Os05g41180|LOC_Os01g16190|LOC_Os07g42260	osa:4346117|osa:4340828|osa:4327357|osa:4324379|osa:4343891|	4346117|4340828|4327357|4324379|4343891|	http://www.genome.jp/kegg-bin/show_pathway?osa03050/osa:4343891%09red/osa:4346117%09red/osa:4340828%09red/osa:4324379%09red/osa:4327357%09red
Taurine and hypotaurine metabolism	KEGG PATHWAY	osa00430	1	16	0.827042	1	LOC_Os03g13300	osa:4332184|	4332184|	http://www.genome.jp/kegg-bin/show_pathway?osa00430/osa:4332184%09red
Glycine, serine and threonine metabolism	KEGG PATHWAY	osa00260	4	55	0.843018	1	LOC_Os08g34720|LOC_Os08g04180|LOC_Os07g08430|LOC_Os06g23114	osa:4337230|osa:4344612|osa:4342571|osa:4340945|	4337230|4344612|4342571|4340945|	http://www.genome.jp/kegg-bin/show_pathway?osa00260/osa:4342571%09red/osa:4340945%09red/osa:4344612%09red/osa:4337230%09red
Pyrimidine metabolism	KEGG PATHWAY	osa00240	9	112	0.850454	1	LOC_Os09g39440|LOC_Os04g27950|LOC_Os01g55974|LOC_Os02g48290|LOC_Os07g43170|LOC_Os07g22400|LOC_Os01g51540|LOC_Os07g48430|LOC_Os08g44370	osa:4347891|osa:4329363|osa:4326895|osa:4330505|osa:4343960|osa:4342990|osa:4325937|osa:4344315|osa:4346302|	4347891|4329363|4326895|4330505|4343960|4342990|4325937|4344315|4346302|	http://www.genome.jp/kegg-bin/show_pathway?osa00240/osa:4346302%09red/osa:4326895%09red/osa:4329363%09red/osa:4343960%09red/osa:4347891%09red/osa:4330505%09red/osa:4342990%09red/osa:4344315%09red/osa:4325937%09red
beta-Alanine metabolism	KEGG PATHWAY	osa00410	2	33	0.870492	1	LOC_Os03g13300|LOC_Os06g23114	osa:4332184|osa:4340945|	4332184|4340945|	http://www.genome.jp/kegg-bin/show_pathway?osa00410/osa:4332184%09red/osa:4340945%09red
Folate biosynthesis	KEGG PATHWAY	osa00790	1	19	0.873143	1	LOC_Os05g15530	osa:4338203|	4338203|	http://www.genome.jp/kegg-bin/show_pathway?osa00790/osa:4338203%09red
Biotin metabolism	KEGG PATHWAY	osa00780	1	20	0.885599	1	LOC_Os07g07440	osa:4342507|	4342507|	http://www.genome.jp/kegg-bin/show_pathway?osa00780/osa:4342507%09red
Plant hormone signal transduction	KEGG PATHWAY	osa04075	15	184	0.889174	1	LOC_Os03g08330|LOC_Os03g08320|LOC_Os02g14130|LOC_Os03g46440|LOC_Os07g40290|LOC_Os04g32480|LOC_Os07g42370|LOC_Os02g10140|LOC_Os09g10840|LOC_Os10g11500|LOC_Os06g41100|LOC_Os01g55940|LOC_Os03g08310|LOC_Os02g05050|LOC_Os10g25290	osa:4331834|osa:4331833|osa:4328830|osa:4333666|osa:4343785|osa:4335698|osa:4343899|osa:4328605|osa:4346610|osa:4348237|osa:4341530|osa:4326893|osa:4331832|osa:4328276|osa:4348533|	4331834|4331833|4328830|4333666|4343785|4335698|4343899|4328605|4346610|4348237|4341530|4326893|4331832|4328276|4348533|	http://www.genome.jp/kegg-bin/show_pathway?osa04075/osa:4331834%09red/osa:4333666%09red/osa:4331832%09red/osa:4331833%09red/osa:4326893%09red/osa:4328830%09red/osa:4346610%09red/osa:4343899%09red/osa:4341530%09red/osa:4335698%09red/osa:4328276%09red/osa:4328605%09red/osa:4343785%09red/osa:4348533%09red/osa:4348237%09red
Porphyrin and chlorophyll metabolism	KEGG PATHWAY	osa00860	2	35	0.889926	1	LOC_Os09g12560|LOC_Os10g25040	osa:4346651|osa:4348519|	4346651|4348519|	http://www.genome.jp/kegg-bin/show_pathway?osa00860/osa:4348519%09red/osa:4346651%09red
Ubiquitin mediated proteolysis	KEGG PATHWAY	osa04120	9	119	0.891396	1	LOC_Os09g12230|LOC_Os03g24040|LOC_Os07g43240|LOC_Os09g10300|LOC_Os05g38830|LOC_Os01g40320|LOC_Os09g10200|LOC_Os10g39120|LOC_Os02g16040	osa:4346639|osa:9266295|osa:4343962|osa:4346592|osa:4339037|osa:4339794|osa:4346586|osa:4349236|osa:4328940|	4346639|9266295|4343962|4346592|4339037|4339794|4346586|4349236|4328940|	http://www.genome.jp/kegg-bin/show_pathway?osa04120/osa:4339037%09red/osa:4349236%09red/osa:4328940%09red/osa:4343962%09red/osa:4339794%09red/osa:4346592%09red/osa:4346586%09red/osa:4346639%09red/osa:9266295%09red
Sphingolipid metabolism	KEGG PATHWAY	osa00600	1	22	0.906966	1	LOC_Os11g31640	osa:4350591|	4350591|	http://www.genome.jp/kegg-bin/show_pathway?osa00600/osa:4350591%09red
Ether lipid metabolism	KEGG PATHWAY	osa00565	1	22	0.906966	1	LOC_Os10g38060	osa:4349161|	4349161|	http://www.genome.jp/kegg-bin/show_pathway?osa00565/osa:4349161%09red
Endocytosis	KEGG PATHWAY	osa04144	7	103	0.923777	1	LOC_Os10g38060|LOC_Os02g06490|Novel00572|LOC_Os05g01250|LOC_Os05g48980|LOC_Os10g33660|LOC_Os11g47710	osa:4349161|osa:4325480|osa:4332241|osa:4337536|osa:4339623|osa:4348891|osa:4351205|	4349161|4325480|4332241|4337536|4339623|4348891|4351205|	http://www.genome.jp/kegg-bin/show_pathway?osa04144/osa:4349161%09red/osa:4339623%09red/osa:4332241%09red/osa:4348891%09red/osa:4337536%09red/osa:4351205%09red/osa:4325480%09red
RNA degradation	KEGG PATHWAY	osa03018	6	92	0.927821	1	LOC_Os06g38980|LOC_Os04g55140|LOC_Os09g31486|LOC_Os04g58810|LOC_Os11g17390|LOC_Os10g28590	osa:4341408|osa:4349826|osa:9270165|osa:4337457|osa:4349826|osa:4337457|	4341408|4349826|9270165|4337457|4349826|4337457|	http://www.genome.jp/kegg-bin/show_pathway?osa03018/osa:9270165%09red/osa:4349826%09red/osa:4337457%09red/osa:4341408%09red
Circadian rhythm - plant	KEGG PATHWAY	osa04712	1	25	0.931778	1	LOC_Os01g10590	osa:4340185|	4340185|	http://www.genome.jp/kegg-bin/show_pathway?osa04712/osa:4340185%09red
Protein export	KEGG PATHWAY	osa03060	3	56	0.937683	1	LOC_Os01g38510|LOC_Os05g43390|LOC_Os09g28000	osa:4327929|osa:4339274|osa:4347239|	4327929|4339274|4347239|	http://www.genome.jp/kegg-bin/show_pathway?osa03060/osa:4347239%09red/osa:4339274%09red/osa:4327929%09red
Steroid biosynthesis	KEGG PATHWAY	osa00100	1	26	0.938481	1	LOC_Os01g11340	osa:4325563|	4325563|	http://www.genome.jp/kegg-bin/show_pathway?osa00100/osa:4325563%09red
Glyoxylate and dicarboxylate metabolism	KEGG PATHWAY	osa00630	3	58	0.946367	1	LOC_Os03g12290|LOC_Os04g40990|LOC_Os06g29220	osa:4332108|osa:9268154|osa:4341070|	4332108|9268154|4341070|	http://www.genome.jp/kegg-bin/show_pathway?osa00630/osa:4341070%09red/osa:9268154%09red/osa:4332108%09red
Protein processing in endoplasmic reticulum	KEGG PATHWAY	osa04141	15	203	0.948991	1	LOC_Os01g05120|LOC_Os09g12230|LOC_Os01g04370|LOC_Os05g06440|LOC_Os07g43240|LOC_Os09g10300|LOC_Os01g04360|LOC_Os12g37360|LOC_Os01g04350|LOC_Os01g38510|LOC_Os06g11610|LOC_Os09g10200|LOC_Os05g23140|LOC_Os02g34940|LOC_Os02g16040	osa:4328514|osa:4346639|osa:4325697|osa:4337860|osa:4343962|osa:4346592|osa:4325696|osa:4352510|osa:4325695|osa:4327929|osa:4340508|osa:4346586|osa:9267020|osa:4329652|osa:4328940|	4328514|4346639|4325697|4337860|4343962|4346592|4325696|4352510|4325695|4327929|4340508|4346586|9267020|4329652|4328940|	http://www.genome.jp/kegg-bin/show_pathway?osa04141/osa:4352510%09red/osa:9267020%09red/osa:4325695%09red/osa:4328940%09red/osa:4343962%09red/osa:4325696%09red/osa:4327929%09red/osa:4346639%09red/osa:4329652%09red/osa:4346586%09red/osa:4337860%09red/osa:4325697%09red/osa:4346592%09red/osa:4340508%09red/osa:4328514%09red
Purine metabolism	KEGG PATHWAY	osa00230	9	135	0.951144	1	LOC_Os12g05110|LOC_Os04g57540|LOC_Os12g33100|LOC_Os02g40010|LOC_Os12g13380|LOC_Os07g22400|LOC_Os07g48430|LOC_Os01g16960|LOC_Os11g10980	osa:4351493|osa:4331502|osa:4352344|osa:4329972|osa:4351850|osa:4342990|osa:4344315|osa:4324263|osa:4350078|	4351493|4331502|4352344|4329972|4351850|4342990|4344315|4324263|4350078|	http://www.genome.jp/kegg-bin/show_pathway?osa00230/osa:4350078%09red/osa:4324263%09red/osa:4352344%09red/osa:4329972%09red/osa:4351493%09red/osa:4351850%09red/osa:4342990%09red/osa:4331502%09red/osa:4344315%09red
Citrate cycle (TCA cycle)	KEGG PATHWAY	osa00020	2	50	0.969136	1	LOC_Os09g20440|LOC_Os03g21950	osa:4346890|osa:4332774|	4346890|4332774|	http://www.genome.jp/kegg-bin/show_pathway?osa00020/osa:4332774%09red/osa:4346890%09red
Aminoacyl-tRNA biosynthesis	KEGG PATHWAY	osa00970	6	114	0.981596	1	LOC_Os02g09120|LOC_Os10g26050|LOC_Os04g58400|LOC_Os05g15150|LOC_Os01g06510|LOC_Os10g36210	osa:9268435|osa:4348562|osa:4344663|osa:4347497|osa:4337898|osa:9267455|	9268435|4348562|4344663|4347497|4337898|9267455|	http://www.genome.jp/kegg-bin/show_pathway?osa00970/osa:9268435%09red/osa:4348562%09red/osa:4344663%09red/osa:4347497%09red/osa:9267455%09red/osa:4337898%09red
Ribosome biogenesis in eukaryotes	KEGG PATHWAY	osa03008	4	90	0.98587	1	LOC_Os11g17390|LOC_Os04g55140|LOC_Os01g17330|LOC_Os04g48700	osa:4349826|osa:4349826|osa:4326910|osa:4336736|	4349826|4349826|4326910|4336736|	http://www.genome.jp/kegg-bin/show_pathway?osa03008/osa:4326910%09red/osa:4349826%09red/osa:4336736%09red
Pentose and glucuronate interconversions	KEGG PATHWAY	osa00040	1	41	0.986977	1	LOC_Os01g57854	osa:4325861|	4325861|	http://www.genome.jp/kegg-bin/show_pathway?osa00040/osa:4325861%09red
Basal transcription factors	KEGG PATHWAY	osa03022	1	41	0.986977	1	LOC_Os03g07930	osa:4331801|	4331801|	http://www.genome.jp/kegg-bin/show_pathway?osa03022/osa:4331801%09red
Photosynthesis	KEGG PATHWAY	osa00195	3	79	0.989791	1	LOC_Os01g64120|LOC_Os03g61960|LOC_Os04g31630	osa:9270637|osa:4334701|osa:4343570|	9270637|4334701|4343570|	http://www.genome.jp/kegg-bin/show_pathway?osa00195/osa:4343570%09red/osa:4334701%09red/osa:9270637%09red
RNA transport	KEGG PATHWAY	osa03013	8	151	0.990627	1	LOC_Os06g38980|LOC_Os02g19770|LOC_Os02g05330|LOC_Os04g53606|LOC_Os03g18350|LOC_Os01g58220|LOC_Os10g39120|LOC_Os03g59550	osa:4341408|osa:4329091|osa:4328286|osa:4337078|osa:4338508|osa:4324136|osa:4349236|osa:4334528|	4341408|4329091|4328286|4337078|4338508|4324136|4349236|4334528|	http://www.genome.jp/kegg-bin/show_pathway?osa03013/osa:4324136%09red/osa:4349236%09red/osa:4341408%09red/osa:4338508%09red/osa:4334528%09red/osa:4329091%09red/osa:4328286%09red/osa:4337078%09red
mRNA surveillance pathway	KEGG PATHWAY	osa03015	4	107	0.996199	1	LOC_Os06g38980|LOC_Os02g06940|LOC_Os06g48310|LOC_Os03g59550	osa:4341408|osa:4347905|osa:4341950|osa:4334528|	4341408|4347905|4341950|4334528|	http://www.genome.jp/kegg-bin/show_pathway?osa03015/osa:4341950%09red/osa:4334528%09red/osa:4341408%09red/osa:4347905%09red
DNA replication	KEGG PATHWAY	osa03030	1	54	0.996616	1	LOC_Os07g22400	osa:4342990|	4342990|	http://www.genome.jp/kegg-bin/show_pathway?osa03030/osa:4342990%09red
Oxidative phosphorylation	KEGG PATHWAY	osa00190	6	144	0.997718	1	LOC_Os07g42910|LOC_Os01g23580|LOC_Os06g08310|LOC_Os09g20440|LOC_Os12g07140|Novel00882	osa:4333018|osa:4326846|osa:4340312|osa:4346890|osa:4351612|osa:4336292|	4333018|4326846|4340312|4346890|4351612|4336292|	http://www.genome.jp/kegg-bin/show_pathway?osa00190/osa:4340312%09red/osa:4333018%09red/osa:4346890%09red/osa:4336292%09red/osa:4326846%09red/osa:4351612%09red
Phagosome	KEGG PATHWAY	osa04145	2	80	0.997955	1	LOC_Os01g38510|LOC_Os12g07140	osa:4327929|osa:4351612|	4327929|4351612|	http://www.genome.jp/kegg-bin/show_pathway?osa04145/osa:4327929%09red/osa:4351612%09red
Nucleotide excision repair	KEGG PATHWAY	osa03420	1	70	0.999357	1	LOC_Os01g40320	osa:4339794|	4339794|	http://www.genome.jp/kegg-bin/show_pathway?osa03420/osa:4339794%09red
Spliceosome	KEGG PATHWAY	osa03040	2	196	1	1	LOC_Os05g32370|LOC_Os03g59550	osa:4338675|osa:4334528|	4338675|4334528|	http://www.genome.jp/kegg-bin/show_pathway?osa03040/osa:4338675%09red/osa:4334528%09red
Ribosome	KEGG PATHWAY	osa03010	4	330	1	1	LOC_Os10g34990|LOC_Os09g31031|LOC_Os09g27930|LOC_Os03g15370	osa:4326977|osa:4347411|osa:4347232|osa:4332312|	4326977|4347411|4347232|4332312|	http://www.genome.jp/kegg-bin/show_pathway?osa03010/osa:4332312%09red/osa:4347411%09red/osa:4347232%09red/osa:4326977%09red
--------------------
#Term	Database	ID	Input number	Background number	P-Value	Corrected P-Value	Input	KEGG_ID/KO	Entrez_ID	Hyperlink
--------------------
#Term	Database	ID	Input number	Background number	P-Value	Corrected P-Value	Input	KEGG_ID/KO	Entrez_ID	Hyperlink
--------------------

## Sheet: lmp1-1vsNip_down_KEGG
##Databases: KEGG PATHWAY
##Statistical test method: hypergeometric test / Fisher's exact test
##FDR correction method: Benjamini and Hochberg
#Term	Database	ID	Input number	Background number	P-Value	Corrected P-Value	Input	KEGG_ID/KO	Entrez_ID	Hyperlink
Diterpenoid biosynthesis	KEGG PATHWAY	osa00904	8	27	0.000210072	0.0197467	LOC_Os04g52230|LOC_Os02g36220|LOC_Os02g17780|LOC_Os06g37330|LOC_Os02g36264|LOC_Os02g36150|LOC_Os06g37364|LOC_Os03g63970	osa:4336960|osa:4329728|osa:4329013|osa:4341345|osa:4329728|osa:4329725|osa:4341347|osa:4334841|	4336960|4329728|4329013|4341345|4329728|4329725|4341347|4334841|	http://www.genome.jp/kegg-bin/show_pathway?osa00904/osa:4334841%09red/osa:4329013%09red/osa:4341347%09red/osa:4341345%09red/osa:4329728%09red/osa:4336960%09red/osa:4329725%09red
Carbon fixation in photosynthetic organisms	KEGG PATHWAY	osa00710	11	77	0.00333675	0.14797	LOC_Os12g07210|LOC_Os06g40640|LOC_Os10g13694|LOC_Os12g19381|LOC_Os04g16680|LOC_Os05g41640|LOC_Os02g47020|LOC_Os03g56280|LOC_Os01g64660|LOC_Os06g45710|LOC_Os12g19470	osa:4349897|osa:4341496|osa:4348268|osa:4352014|osa:4335227|osa:4341792|osa:4330413|osa:4334274|osa:4325071|osa:4341792|osa:4352021|	4349897|4341496|4348268|4352014|4335227|4341792|4330413|4334274|4325071|4341792|4352021|	http://www.genome.jp/kegg-bin/show_pathway?osa00710/osa:4335227%09red/osa:4325071%09red/osa:4334274%09red/osa:4352014%09red/osa:4330413%09red/osa:4341496%09red/osa:4348268%09red/osa:4349897%09red/osa:4341792%09red/osa:4352021%09red
Biosynthesis of secondary metabolites	KEGG PATHWAY	osa01110	57	779	0.00472246	0.14797	LOC_Os12g07210|LOC_Os09g38320|LOC_Os06g40640|LOC_Os10g13694|LOC_Os07g38790|LOC_Os03g52460|LOC_Os06g44540|LOC_Os05g41640|LOC_Os02g43280|LOC_Os03g56280|LOC_Os06g45710|LOC_Os04g39864|LOC_Os01g56380|LOC_Os02g04690|LOC_Os04g52230|LOC_Os05g35420|LOC_Os10g08474|LOC_Os02g39570|LOC_Os06g21570|LOC_Os02g47510|LOC_Os06g37330|LOC_Os03g59640|LOC_Os01g16020|LOC_Os07g02440|LOC_Os04g51390|LOC_Os09g23820|LOC_Os03g…	osa:4349897|osa:4347813|osa:4341496|osa:4348268|osa:4343697|osa:4334020|osa:9266710|osa:4341792|osa:4330149|osa:4334274|osa:4341792|osa:4336146|osa:4325604|osa:4328256|osa:4336960|osa:4347383|osa:4348172|osa:4329938|osa:4336146|osa:4330451|osa:4341345|osa:4334537|osa:4326207|osa:4342251|osa:4337265|osa:9269428|osa:4331869|osa:4337048|osa:4330146|osa:4335335|osa:4332084|osa:4329013|osa:4333259|osa…	4349897|4347813|4341496|4348268|4343697|4334020|9266710|4341792|4330149|4334274|4341792|4336146|4325604|4328256|4336960|4347383|4348172|4329938|4336146|4330451|4341345|4334537|4326207|4342251|4337265|9269428|4331869|4337048|4330146|4335335|4332084|4329013|4333259|4344386|4341870|4327918|4324196|4337102|4334841|4345995|4328624|4329175|4325444|4348230|4349224|4332153|4329728|4336388|4345962|4329728…	http://www.genome.jp/kegg-bin/show_pathway?osa01110/osa:4337048%09red/osa:4325071%09red/osa:4334841%09red/osa:9269428%09red/osa:4341496%09red/osa:4332084%09red/osa:4348268%09red/osa:4329013%09red/osa:4345995%09red/osa:4335335%09red/osa:4329938%09red/osa:4337102%09red/osa:9266710%09red/osa:4336960%09red/osa:4333259%09red/osa:4334537%09red/osa:4342251%09red/osa:4341663%09red/osa:4330451%09red/osa:4…
Cyanoamino acid metabolism	KEGG PATHWAY	osa00460	6	36	0.0148715	0.293227	LOC_Os06g44540|LOC_Os04g43390|LOC_Os06g21570|LOC_Os04g39864|LOC_Os06g46940|LOC_Os08g39860	osa:9266710|osa:4336388|osa:4336146|osa:4336146|osa:4341870|osa:4345995|	9266710|4336388|4336146|4336146|4341870|4345995|	http://www.genome.jp/kegg-bin/show_pathway?osa00460/osa:4336146%09red/osa:4336388%09red/osa:4345995%09red/osa:9266710%09red/osa:4341870%09red
Carotenoid biosynthesis	KEGG PATHWAY	osa00906	5	26	0.0155972	0.293227	LOC_Os02g47510|LOC_Os01g39960|LOC_Os08g36860|LOC_Os09g38320|LOC_Os10g38940	osa:4330451|osa:4324196|osa:4345810|osa:4347813|osa:4349224|	4330451|4324196|4345810|4347813|4349224|	http://www.genome.jp/kegg-bin/show_pathway?osa00906/osa:4347813%09red/osa:4349224%09red/osa:4324196%09red/osa:4330451%09red/osa:4345810%09red
Photosynthesis	KEGG PATHWAY	osa00195	9	79	0.0261075	0.368772	LOC_Os10g21212|LOC_Os06g46436|LOC_Os02g36850|LOC_Os07g05360|LOC_Os02g24642|LOC_Os04g33630|LOC_Os04g16740|LOC_Os06g01850|LOC_Os08g02630	osa:3131411|osa:3131408|osa:4329766|osa:4342395|osa:3131417|osa:4335779|osa:3131390|osa:4339874|osa:4344539|	3131411|3131408|4329766|4342395|3131417|4335779|3131390|4339874|4344539|	http://www.genome.jp/kegg-bin/show_pathway?osa00195/osa:4339874%09red/osa:3131408%09red/osa:3131411%09red/osa:4342395%09red/osa:3131417%09red/osa:4329766%09red/osa:4335779%09red/osa:4344539%09red/osa:3131390%09red
Tryptophan metabolism	KEGG PATHWAY	osa00380	4	21	0.0305905	0.368772	LOC_Os02g43280|LOC_Os07g07050|LOC_Os02g43194|LOC_Os07g25540	osa:4330149|osa:4348072|osa:4330146|osa:4343079|	4330149|4348072|4330146|4343079|	http://www.genome.jp/kegg-bin/show_pathway?osa00380/osa:4330149%09red/osa:4348072%09red/osa:4343079%09red/osa:4330146%09red
beta-Alanine metabolism	KEGG PATHWAY	osa00410	5	33	0.0350114	0.368772	LOC_Os02g43280|LOC_Os04g57560|LOC_Os04g40040|LOC_Os04g20164|LOC_Os02g43194	osa:4330149|osa:4337360|osa:4336153|osa:4335335|osa:4330146|	4330149|4337360|4336153|4335335|4330146|	http://www.genome.jp/kegg-bin/show_pathway?osa00410/osa:4330149%09red/osa:4335335%09red/osa:4330146%09red/osa:4337360%09red/osa:4336153%09red
Porphyrin and chlorophyll metabolism	KEGG PATHWAY	osa00860	5	35	0.0424564	0.368772	LOC_Os01g18320|LOC_Os03g59640|LOC_Os01g16020|LOC_Os03g08730|LOC_Os03g36540	osa:4327918|osa:4334537|osa:4326207|osa:4331869|osa:4333259|	4327918|4334537|4326207|4331869|4333259|	http://www.genome.jp/kegg-bin/show_pathway?osa00860/osa:4326207%09red/osa:4327918%09red/osa:4331869%09red/osa:4333259%09red/osa:4334537%09red
Other glycan degradation	KEGG PATHWAY	osa00511	3	14	0.0462479	0.368772	LOC_Os07g38790|LOC_Os03g11980|LOC_Os11g32369	osa:4343697|osa:4332084|osa:4350617|	4343697|4332084|4350617|	http://www.genome.jp/kegg-bin/show_pathway?osa00511/osa:4350617%09red/osa:4343697%09red/osa:4332084%09red
Limonene and pinene degradation	KEGG PATHWAY	osa00903	3	14	0.0462479	0.368772	LOC_Os02g43280|LOC_Os10g08474|LOC_Os02g43194	osa:4330149|osa:4348172|osa:4330146|	4330149|4348172|4330146|	http://www.genome.jp/kegg-bin/show_pathway?osa00903/osa:4330149%09red/osa:4348172%09red/osa:4330146%09red
Glycolysis / Gluconeogenesis	KEGG PATHWAY	osa00010	11	119	0.050234	0.368772	LOC_Os12g07210|LOC_Os06g40640|LOC_Os02g43194|LOC_Os10g13694|LOC_Os05g35420|LOC_Os10g11140|LOC_Os05g41640|LOC_Os02g43280|LOC_Os04g51390|LOC_Os01g64660|LOC_Os06g45710	osa:4349897|osa:4341496|osa:4330146|osa:4348268|osa:4347383|osa:4348230|osa:4341792|osa:4330149|osa:4337265|osa:4325071|osa:4341792|	4349897|4341496|4330146|4348268|4347383|4348230|4341792|4330149|4337265|4325071|4341792|	http://www.genome.jp/kegg-bin/show_pathway?osa00010/osa:4325071%09red/osa:4347383%09red/osa:4330146%09red/osa:4330149%09red/osa:4341496%09red/osa:4348268%09red/osa:4349897%09red/osa:4337265%09red/osa:4341792%09red/osa:4348230%09red
Glycosphingolipid biosynthesis - ganglio series	KEGG PATHWAY	osa00604	2	6	0.05396	0.368772	LOC_Os07g38790|LOC_Os03g11980	osa:4343697|osa:4332084|	4343697|4332084|	http://www.genome.jp/kegg-bin/show_pathway?osa00604/osa:4343697%09red/osa:4332084%09red
Steroid biosynthesis	KEGG PATHWAY	osa00100	4	26	0.0549235	0.368772	LOC_Os10g39810|LOC_Os03g12910|LOC_Os02g04690|LOC_Os02g21810	osa:4349278|osa:4332153|osa:4328256|osa:4329175|	4349278|4332153|4328256|4329175|	http://www.genome.jp/kegg-bin/show_pathway?osa00100/osa:4332153%09red/osa:4329175%09red/osa:4328256%09red/osa:4349278%09red
Glycosaminoglycan degradation	KEGG PATHWAY	osa00531	2	8	0.0813815	0.478116	LOC_Os07g38790|LOC_Os03g11980	osa:4343697|osa:4332084|	4343697|4332084|	http://www.genome.jp/kegg-bin/show_pathway?osa00531/osa:4343697%09red/osa:4332084%09red
Glycosphingolipid biosynthesis - globo series	KEGG PATHWAY	osa00603	2	8	0.0813815	0.478116	LOC_Os07g38790|LOC_Os03g11980	osa:4343697|osa:4332084|	4343697|4332084|	http://www.genome.jp/kegg-bin/show_pathway?osa00603/osa:4343697%09red/osa:4332084%09red
Glyoxylate and dicarboxylate metabolism	KEGG PATHWAY	osa00630	6	58	0.0884081	0.488845	LOC_Os04g53214|LOC_Os07g46460|LOC_Os08g39300|LOC_Os03g56280|LOC_Os12g19381|LOC_Os12g19470	osa:4337048|osa:4344164|osa:4345962|osa:4334274|osa:4352014|osa:4352021|	4337048|4344164|4345962|4334274|4352014|4352021|	http://www.genome.jp/kegg-bin/show_pathway?osa00630/osa:4337048%09red/osa:4334274%09red/osa:4345962%09red/osa:4352014%09red/osa:4352021%09red/osa:4344164%09red
Isoquinoline alkaloid biosynthesis	KEGG PATHWAY	osa00950	3	20	0.0975399	0.509375	LOC_Os04g40040|LOC_Os04g20164|LOC_Os01g56380	osa:4336153|osa:4335335|osa:4325604|	4336153|4335335|4325604|	http://www.genome.jp/kegg-bin/show_pathway?osa00950/osa:4335335%09red/osa:4325604%09red/osa:4336153%09red
Pentose phosphate pathway	KEGG PATHWAY	osa00030	5	48	0.112268	0.555407	LOC_Os10g11140|LOC_Os12g07210|LOC_Os01g64660|LOC_Os06g40640|LOC_Os05g35420	osa:4348230|osa:4349897|osa:4325071|osa:4341496|osa:4347383|	4348230|4349897|4325071|4341496|4347383|	http://www.genome.jp/kegg-bin/show_pathway?osa00030/osa:4341496%09red/osa:4325071%09red/osa:4349897%09red/osa:4347383%09red/osa:4348230%09red
Ether lipid metabolism	KEGG PATHWAY	osa00565	3	22	0.118172	0.555407	LOC_Os06g40170|LOC_Os05g07880|LOC_Os06g40180	osa:4341467|osa:4327647|osa:4341468|	4341467|4327647|4341468|	http://www.genome.jp/kegg-bin/show_pathway?osa00565/osa:4327647%09red/osa:4341468%09red/osa:4341467%09red
Fructose and mannose metabolism	KEGG PATHWAY	osa00051	5	53	0.148329	0.648508	LOC_Os12g07210|LOC_Os06g40640|LOC_Os01g64660|LOC_Os06g22060|LOC_Os05g35420	osa:4349897|osa:4341496|osa:4325071|osa:4340909|osa:4347383|	4349897|4341496|4325071|4340909|4347383|	http://www.genome.jp/kegg-bin/show_pathway?osa00051/osa:4341496%09red/osa:4325071%09red/osa:4340909%09red/osa:4349897%09red/osa:4347383%09red
Lysine degradation	KEGG PATHWAY	osa00310	3	25	0.151779	0.648508	LOC_Os02g43280|LOC_Os02g43194|LOC_Os08g30910	osa:4330149|osa:4330146|osa:4345509|	4330149|4330146|4345509|	http://www.genome.jp/kegg-bin/show_pathway?osa00310/osa:4330149%09red/osa:4345509%09red/osa:4330146%09red
Glycine, serine and threonine metabolism	KEGG PATHWAY	osa00260	5	55	0.163977	0.662879	LOC_Os06g44460|LOC_Os06g40940|LOC_Os04g40040|LOC_Os04g20164|LOC_Os08g39300	osa:4341713|osa:4325932|osa:4336153|osa:4335335|osa:4345962|	4341713|4325932|4336153|4335335|4345962|	http://www.genome.jp/kegg-bin/show_pathway?osa00260/osa:4335335%09red/osa:4341713%09red/osa:4325932%09red/osa:4345962%09red/osa:4336153%09red
Endocytosis	KEGG PATHWAY	osa04144	8	103	0.169246	0.662879	LOC_Os03g49510|LOC_Os05g07880|LOC_Os07g46490|LOC_Os03g43860|LOC_Os01g01350|LOC_Os08g42530|LOC_Os06g40180|LOC_Os06g40170	osa:4333833|osa:4327647|osa:4344166|osa:4333538|osa:9266052|osa:4346168|osa:4341468|osa:4341467|	4333833|4327647|4344166|4333538|9266052|4346168|4341468|4341467|	http://www.genome.jp/kegg-bin/show_pathway?osa04144/osa:4341467%09red/osa:4327647%09red/osa:4341468%09red/osa:4346168%09red/osa:4333833%09red/osa:4333538%09red/osa:9266052%09red/osa:4344166%09red
Carbon metabolism	KEGG PATHWAY	osa01200	15	225	0.187067	0.664004	LOC_Os12g07210|LOC_Os01g64660|LOC_Os06g40640|LOC_Os10g13694|LOC_Os05g35420|LOC_Os12g19381|LOC_Os06g44460|LOC_Os08g39300|LOC_Os05g41640|LOC_Os04g16680|LOC_Os02g47020|LOC_Os03g56280|LOC_Os06g40940|LOC_Os06g45710|LOC_Os12g19470	osa:4349897|osa:4325071|osa:4341496|osa:4348268|osa:4347383|osa:4352014|osa:4341713|osa:4345962|osa:4341792|osa:4335227|osa:4330413|osa:4334274|osa:4325932|osa:4341792|osa:4352021|	4349897|4325071|4341496|4348268|4347383|4352014|4341713|4345962|4341792|4335227|4330413|4334274|4325932|4341792|4352021|	http://www.genome.jp/kegg-bin/show_pathway?osa01200/osa:4335227%09red/osa:4325071%09red/osa:4334274%09red/osa:4345962%09red/osa:4347383%09red/osa:4352014%09red/osa:4330413%09red/osa:4341496%09red/osa:4348268%09red/osa:4325932%09red/osa:4349897%09red/osa:4341792%09red/osa:4352021%09red/osa:4341713%09red
Glycerolipid metabolism	KEGG PATHWAY	osa00561	4	43	0.191634	0.664004	LOC_Os02g43280|LOC_Os05g32140|LOC_Os01g44069|LOC_Os02g43194	osa:4330149|osa:4338660|osa:4326672|osa:4330146|	4330149|4338660|4326672|4330146|	http://www.genome.jp/kegg-bin/show_pathway?osa00561/osa:4330149%09red/osa:4326672%09red/osa:4338660%09red/osa:4330146%09red
Histidine metabolism	KEGG PATHWAY	osa00340	2	15	0.197788	0.664004	LOC_Os02g43280|LOC_Os02g43194	osa:4330149|osa:4330146|	4330149|4330146|	http://www.genome.jp/kegg-bin/show_pathway?osa00340/osa:4330149%09red/osa:4330146%09red
Photosynthesis - antenna proteins	KEGG PATHWAY	osa00196	2	15	0.197788	0.664004	LOC_Os02g10390|LOC_Os09g26810	osa:4328623|osa:4347166|	4328623|4347166|	http://www.genome.jp/kegg-bin/show_pathway?osa00196/osa:4347166%09red/osa:4328623%09red
Tropane, piperidine and pyridine alkaloid biosynthesis	KEGG PATHWAY	osa00960	2	16	0.215816	0.699542	LOC_Os04g40040|LOC_Os04g20164	osa:4336153|osa:4335335|	4336153|4335335|	http://www.genome.jp/kegg-bin/show_pathway?osa00960/osa:4335335%09red/osa:4336153%09red
Plant hormone signal transduction	KEGG PATHWAY	osa04075	12	184	0.241143	0.755582	LOC_Os05g48870|LOC_Os07g08460|LOC_Os02g49160|LOC_Os01g13030|LOC_Os01g09450|LOC_Os04g41630|LOC_Os02g36510|LOC_Os01g46760|LOC_Os09g02360|LOC_Os02g57250|LOC_Os01g59350|LOC_Os06g41720	osa:9268260|osa:4342573|osa:4330571|osa:4325890|osa:4326775|osa:4333860|osa:4332697|osa:4324182|osa:4346394|osa:4331149|osa:4326907|osa:4333860|	9268260|4342573|4330571|4325890|4326775|4333860|4332697|4324182|4346394|4331149|4326907|4333860|	http://www.genome.jp/kegg-bin/show_pathway?osa04075/osa:4326907%09red/osa:4331149%09red/osa:4346394%09red/osa:4330571%09red/osa:4332697%09red/osa:9268260%09red/osa:4325890%09red/osa:4342573%09red/osa:4333860%09red/osa:4324182%09red/osa:4326775%09red
Sesquiterpenoid and triterpenoid biosynthesis	KEGG PATHWAY	osa00909	1	5	0.257614	0.756741	LOC_Os03g12910	osa:4332153|	4332153|	http://www.genome.jp/kegg-bin/show_pathway?osa00909/osa:4332153%09red
C5-Branched dibasic acid metabolism	KEGG PATHWAY	osa00660	1	5	0.257614	0.756741	LOC_Os02g39570	osa:4329938|	4329938|	http://www.genome.jp/kegg-bin/show_pathway?osa00660/osa:4329938%09red
Metabolic pathways	KEGG PATHWAY	osa01100	84	1549	0.283965	0.808006	LOC_Os12g07210|LOC_Os03g49510|LOC_Os09g38320|LOC_Os05g07880|LOC_Os06g40640|LOC_Os07g46490|LOC_Os02g10120|LOC_Os03g52460|LOC_Os06g44540|LOC_Os06g44460|LOC_Os07g05360|LOC_Os04g43390|LOC_Os05g41640|LOC_Os08g31630|LOC_Os02g43280|LOC_Os03g56280|LOC_Os06g40940|LOC_Os06g45710|LOC_Os04g39864|LOC_Os03g47610|LOC_Os10g38206|LOC_Os10g21212|LOC_Os02g04690|LOC_Os04g52230|LOC_Os10g13694|LOC_Os08g39860|LOC_Os05g…	osa:4349897|osa:4333833|osa:4347813|osa:4327647|osa:4341496|osa:4344166|osa:4328603|osa:4334020|osa:9266710|osa:4341713|osa:4342395|osa:4336388|osa:4341792|osa:4346885|osa:4330149|osa:4334274|osa:4325932|osa:4341792|osa:4336146|osa:4333719|osa:3131460|osa:3131411|osa:4328256|osa:4336960|osa:4348268|osa:4345995|osa:4347383|osa:3131417|osa:4334711|osa:4348172|osa:4329938|osa:4336146|osa:4330451|osa…	4349897|4333833|4347813|4327647|4341496|4344166|4328603|4334020|9266710|4341713|4342395|4336388|4341792|4346885|4330149|4334274|4325932|4341792|4336146|4333719|3131460|3131411|4328256|4336960|4348268|4345995|4347383|3131417|4334711|4348172|4329938|4336146|4330451|4341345|4334537|4326207|4352021|4326672|3131390|4342251|4337265|4325604|9269428|4331869|4345071|4337048|4335227|4330146|4335335|4332084…	http://www.genome.jp/kegg-bin/show_pathway?osa01100/osa:4337048%09red/osa:4325071%09red/osa:4334841%09red/osa:4343079%09red/osa:3131411%09red/osa:4341496%09red/osa:4334020%09red/osa:4348268%09red/osa:4346885%09red/osa:4326672%09red/osa:4329013%09red/osa:4345995%09red/osa:4335335%09red/osa:4329938%09red/osa:4328603%09red/osa:3131458%09red/osa:4336960%09red/osa:3131408%09red/osa:9266710%09red/osa:4…
Ascorbate and aldarate metabolism	KEGG PATHWAY	osa00053	3	36	0.292257	0.808006	LOC_Os02g43280|LOC_Os02g34810|LOC_Os02g43194	osa:4330149|osa:4329643|osa:4330146|	4330149|4329643|4330146|	http://www.genome.jp/kegg-bin/show_pathway?osa00053/osa:4330149%09red/osa:4329643%09red/osa:4330146%09red
Tyrosine metabolism	KEGG PATHWAY	osa00350	3	37	0.305693	0.821003	LOC_Os04g40040|LOC_Os04g20164|LOC_Os01g56380	osa:4336153|osa:4335335|osa:4325604|	4336153|4335335|4325604|	http://www.genome.jp/kegg-bin/show_pathway?osa00350/osa:4335335%09red/osa:4325604%09red/osa:4336153%09red
Starch and sucrose metabolism	KEGG PATHWAY	osa00500	9	145	0.329536	0.856078	LOC_Os08g31630|LOC_Os10g11140|LOC_Os03g52460|LOC_Os04g43390|LOC_Os07g46790|LOC_Os08g39860|LOC_Os06g46940|LOC_Os06g21570|LOC_Os04g39864	osa:4346885|osa:4348230|osa:4334020|osa:4336388|osa:4344192|osa:4345995|osa:4341870|osa:4336146|osa:4336146|	4346885|4348230|4334020|4336388|4344192|4345995|4341870|4336146|4336146|	http://www.genome.jp/kegg-bin/show_pathway?osa00500/osa:4336388%09red/osa:4341870%09red/osa:4334020%09red/osa:4346885%09red/osa:4345995%09red/osa:4344192%09red/osa:4336146%09red/osa:4348230%09red
Pyruvate metabolism	KEGG PATHWAY	osa00620	5	75	0.345706	0.856078	LOC_Os02g17920|LOC_Os03g56280|LOC_Os02g43194|LOC_Os10g13694|LOC_Os02g43280	osa:4338161|osa:4334274|osa:4330146|osa:4348268|osa:4330149|	4338161|4334274|4330146|4348268|4330149|	http://www.genome.jp/kegg-bin/show_pathway?osa00620/osa:4330149%09red/osa:4348268%09red/osa:4334274%09red/osa:4338161%09red/osa:4330146%09red
Fatty acid biosynthesis	KEGG PATHWAY	osa00061	3	40	0.346074	0.856078	LOC_Os01g69080|LOC_Os05g04170|LOC_Os07g42420	osa:4327738|osa:4337714|osa:4343906|	4327738|4337714|4343906|	http://www.genome.jp/kegg-bin/show_pathway?osa00061/osa:4337714%09red/osa:4327738%09red/osa:4343906%09red
Fatty acid degradation	KEGG PATHWAY	osa00071	3	41	0.359505	0.866499	LOC_Os02g43280|LOC_Os02g43194|LOC_Os05g04170	osa:4330149|osa:4330146|osa:4337714|	4330149|4330146|4337714|	http://www.genome.jp/kegg-bin/show_pathway?osa00071/osa:4330149%09red/osa:4337714%09red/osa:4330146%09red
ABC transporters	KEGG PATHWAY	osa02010	1	9	0.391396	0.919781	LOC_Os01g50080	osa:9268765|	9268765|	http://www.genome.jp/kegg-bin/show_pathway?osa02010/osa:9268765%09red
Nitrogen metabolism	KEGG PATHWAY	osa00910	2	27	0.413274	0.94201	LOC_Os04g33660|LOC_Os07g46460	osa:4329556|osa:4344164|	4329556|4344164|	http://www.genome.jp/kegg-bin/show_pathway?osa00910/osa:4344164%09red/osa:4329556%09red
Thiamine metabolism	KEGG PATHWAY	osa00730	1	10	0.420898	0.94201	LOC_Os03g47610	osa:4333719|	4333719|	http://www.genome.jp/kegg-bin/show_pathway?osa00730/osa:4333719%09red
Phenylpropanoid biosynthesis	KEGG PATHWAY	osa00940	7	125	0.458293	0.952026	LOC_Os04g43390|LOC_Os06g21570|LOC_Os04g39864|LOC_Os06g46940|LOC_Os07g02440|LOC_Os03g02920|LOC_Os08g39860	osa:4336388|osa:4336146|osa:4336146|osa:4341870|osa:4342251|osa:4331437|osa:4345995|	4336388|4336146|4336146|4341870|4342251|4331437|4345995|	http://www.genome.jp/kegg-bin/show_pathway?osa00940/osa:4336388%09red/osa:4342251%09red/osa:4341870%09red/osa:4345995%09red/osa:4336146%09red/osa:4331437%09red
Glycerophospholipid metabolism	KEGG PATHWAY	osa00564	4	68	0.463412	0.952026	LOC_Os06g40170|LOC_Os05g07880|LOC_Os01g44069|LOC_Os06g40180	osa:4341467|osa:4327647|osa:4326672|osa:4341468|	4341467|4327647|4326672|4341468|	http://www.genome.jp/kegg-bin/show_pathway?osa00564/osa:4327647%09red/osa:4326672%09red/osa:4341468%09red/osa:4341467%09red
Arachidonic acid metabolism	KEGG PATHWAY	osa00590	1	12	0.47569	0.952026	LOC_Os06g08670	osa:4336627|	4336627|	http://www.genome.jp/kegg-bin/show_pathway?osa00590/osa:4336627%09red
Nicotinate and nicotinamide metabolism	KEGG PATHWAY	osa00760	1	13	0.501114	0.952026	LOC_Os03g62110	osa:4334711|	4334711|	http://www.genome.jp/kegg-bin/show_pathway?osa00760/osa:4334711%09red
Valine, leucine and isoleucine biosynthesis	KEGG PATHWAY	osa00290	1	14	0.525308	0.952026	LOC_Os02g39570	osa:4329938|	4329938|	http://www.genome.jp/kegg-bin/show_pathway?osa00290/osa:4329938%09red
Zeatin biosynthesis	KEGG PATHWAY	osa00908	1	14	0.525308	0.952026	LOC_Os09g23820	osa:9269428|	9269428|	http://www.genome.jp/kegg-bin/show_pathway?osa00908/osa:9269428%09red
Galactose metabolism	KEGG PATHWAY	osa00052	3	54	0.526072	0.952026	LOC_Os03g59430|LOC_Os10g11140|LOC_Os05g35420	osa:4342703|osa:4348230|osa:4347383|	4342703|4348230|4347383|	http://www.genome.jp/kegg-bin/show_pathway?osa00052/osa:4342703%09red/osa:4348230%09red/osa:4347383%09red
Linoleic acid metabolism	KEGG PATHWAY	osa00591	1	15	0.548331	0.952026	LOC_Os02g10120	osa:4328603|	4328603|	http://www.genome.jp/kegg-bin/show_pathway?osa00591/osa:4328603%09red
Valine, leucine and isoleucine degradation	KEGG PATHWAY	osa00280	2	36	0.555558	0.952026	LOC_Os02g43280|LOC_Os02g43194	osa:4330149|osa:4330146|	4330149|4330146|	http://www.genome.jp/kegg-bin/show_pathway?osa00280/osa:4330149%09red/osa:4330146%09red
Peroxisome	KEGG PATHWAY	osa04146	4	78	0.566353	0.952026	LOC_Os06g02500|LOC_Os05g04170|LOC_Os04g53214|LOC_Os08g39300	osa:4339922|osa:4337714|osa:4337048|osa:4345962|	4339922|4337714|4337048|4345962|	http://www.genome.jp/kegg-bin/show_pathway?osa04146/osa:4337714%09red/osa:4345962%09red/osa:4339922%09red/osa:4337048%09red
Glutathione metabolism	KEGG PATHWAY	osa00480	4	80	0.585617	0.952026	LOC_Os10g38580|LOC_Os02g34810|LOC_Os07g28480|LOC_Os06g08670	osa:4349192|osa:4329643|osa:4343183|osa:4336627|	4349192|4329643|4343183|4336627|	http://www.genome.jp/kegg-bin/show_pathway?osa00480/osa:4343183%09red/osa:4336627%09red/osa:4329643%09red/osa:4349192%09red
Phagosome	KEGG PATHWAY	osa04145	4	80	0.585617	0.952026	LOC_Os03g59264|LOC_Os02g20850|LOC_Os05g34170|LOC_Os01g12900	osa:4334509|osa:4329132|osa:4338790|osa:4325879|	4334509|4329132|4338790|4325879|	http://www.genome.jp/kegg-bin/show_pathway?osa04145/osa:4338790%09red/osa:4329132%09red/osa:4325879%09red/osa:4334509%09red
Amino sugar and nucleotide sugar metabolism	KEGG PATHWAY	osa00520	5	103	0.60513	0.952026	LOC_Os10g11140|LOC_Os07g38790|LOC_Os03g52460|LOC_Os03g11980|LOC_Os05g32140	osa:4348230|osa:4343697|osa:4334020|osa:4332084|osa:4338660|	4348230|4343697|4334020|4332084|4338660|	http://www.genome.jp/kegg-bin/show_pathway?osa00520/osa:4343697%09red/osa:4348230%09red/osa:4334020%09red/osa:4338660%09red/osa:4332084%09red
Stilbenoid, diarylheptanoid and gingerol biosynthesis	KEGG PATHWAY	osa00945	1	18	0.610928	0.952026	LOC_Os10g08474	osa:4348172|	4348172|	http://www.genome.jp/kegg-bin/show_pathway?osa00945/osa:4348172%09red
Alanine, aspartate and glutamate metabolism	KEGG PATHWAY	osa00250	2	41	0.623387	0.952026	LOC_Os08g39300|LOC_Os08g15030	osa:4345962|osa:4345071|	4345962|4345071|	http://www.genome.jp/kegg-bin/show_pathway?osa00250/osa:4345071%09red/osa:4345962%09red
Pentose and glucuronate interconversions	KEGG PATHWAY	osa00040	2	41	0.623387	0.952026	LOC_Os02g43280|LOC_Os02g43194	osa:4330149|osa:4330146|	4330149|4330146|	http://www.genome.jp/kegg-bin/show_pathway?osa00040/osa:4330149%09red/osa:4330146%09red
Arginine and proline metabolism	KEGG PATHWAY	osa00330	3	63	0.626327	0.952026	LOC_Os02g43280|LOC_Os04g57560|LOC_Os02g43194	osa:4330149|osa:4337360|osa:4330146|	4330149|4337360|4330146|	http://www.genome.jp/kegg-bin/show_pathway?osa00330/osa:4330149%09red/osa:4337360%09red/osa:4330146%09red
Flavonoid biosynthesis	KEGG PATHWAY	osa00941	1	19	0.629807	0.952026	LOC_Os04g53920	osa:4337102|	4337102|	http://www.genome.jp/kegg-bin/show_pathway?osa00941/osa:4337102%09red
Mismatch repair	KEGG PATHWAY	osa03430	2	42	0.635952	0.952026	LOC_Os02g47605|LOC_Os05g15520	osa:4334389|osa:4338202|	4334389|4338202|	http://www.genome.jp/kegg-bin/show_pathway?osa03430/osa:4334389%09red/osa:4338202%09red
Biotin metabolism	KEGG PATHWAY	osa00780	1	20	0.647771	0.952026	LOC_Os07g42420	osa:4343906|	4343906|	http://www.genome.jp/kegg-bin/show_pathway?osa00780/osa:4343906%09red
Butanoate metabolism	KEGG PATHWAY	osa00650	1	20	0.647771	0.952026	LOC_Os02g39570	osa:4329938|	4329938|	http://www.genome.jp/kegg-bin/show_pathway?osa00650/osa:4329938%09red
Phosphatidylinositol signaling system	KEGG PATHWAY	osa04070	2	43	0.648188	0.952026	LOC_Os03g49510|LOC_Os07g46490	osa:4333833|osa:4344166|	4333833|4344166|	http://www.genome.jp/kegg-bin/show_pathway?osa04070/osa:4344166%09red/osa:4333833%09red
Inositol phosphate metabolism	KEGG PATHWAY	osa00562	2	45	0.671677	0.967922	LOC_Os03g49510|LOC_Os07g46490	osa:4333833|osa:4344166|	4333833|4344166|	http://www.genome.jp/kegg-bin/show_pathway?osa00562/osa:4344166%09red/osa:4333833%09red
Nucleotide excision repair	KEGG PATHWAY	osa03420	3	70	0.69358	0.967922	LOC_Os02g47605|LOC_Os05g15520|LOC_Os01g63900	osa:4334389|osa:4338202|osa:4324761|	4334389|4338202|4324761|	http://www.genome.jp/kegg-bin/show_pathway?osa03420/osa:4324761%09red/osa:4334389%09red/osa:4338202%09red
Terpenoid backbone biosynthesis	KEGG PATHWAY	osa00900	2	47	0.69388	0.967922	LOC_Os02g10400|LOC_Os01g16020	osa:4328624|osa:4326207|	4328624|4326207|	http://www.genome.jp/kegg-bin/show_pathway?osa00900/osa:4328624%09red/osa:4326207%09red
Fatty acid metabolism	KEGG PATHWAY	osa01212	3	72	0.711031	0.967922	LOC_Os01g69080|LOC_Os05g04170|LOC_Os07g42420	osa:4327738|osa:4337714|osa:4343906|	4327738|4337714|4343906|	http://www.genome.jp/kegg-bin/show_pathway?osa01212/osa:4337714%09red/osa:4327738%09red/osa:4343906%09red
Pantothenate and CoA biosynthesis	KEGG PATHWAY	osa00770	1	24	0.711341	0.967922	LOC_Os02g39570	osa:4329938|	4329938|	http://www.genome.jp/kegg-bin/show_pathway?osa00770/osa:4329938%09red
Citrate cycle (TCA cycle)	KEGG PATHWAY	osa00020	2	50	0.724847	0.967922	LOC_Os03g56280|LOC_Os10g13694	osa:4334274|osa:4348268|	4334274|4348268|	http://www.genome.jp/kegg-bin/show_pathway?osa00020/osa:4348268%09red/osa:4334274%09red
Oxidative phosphorylation	KEGG PATHWAY	osa00190	6	144	0.740465	0.967922	LOC_Os10g38206|LOC_Os02g09150|LOC_Os10g38212|LOC_Os06g43660|LOC_Os12g44150|LOC_Os04g16740	osa:3131460|osa:4341645|osa:3131458|osa:4341645|osa:4352910|osa:3131390|	3131460|4341645|3131458|4341645|4352910|3131390|	http://www.genome.jp/kegg-bin/show_pathway?osa00190/osa:3131460%09red/osa:3131458%09red/osa:3131390%09red/osa:4352910%09red/osa:4341645%09red
Phenylalanine metabolism	KEGG PATHWAY	osa00360	4	99	0.741724	0.967922	LOC_Os07g02440|LOC_Os03g02920|LOC_Os04g40040|LOC_Os04g20164	osa:4342251|osa:4331437|osa:4336153|osa:4335335|	4342251|4331437|4336153|4335335|	http://www.genome.jp/kegg-bin/show_pathway?osa00360/osa:4335335%09red/osa:4342251%09red/osa:4331437%09red/osa:4336153%09red
Homologous recombination	KEGG PATHWAY	osa03440	2	53	0.753127	0.967922	LOC_Os05g15520|LOC_Os04g35420	osa:4338202|osa:4351098|	4338202|4351098|	http://www.genome.jp/kegg-bin/show_pathway?osa03440/osa:4351098%09red/osa:4338202%09red
DNA replication	KEGG PATHWAY	osa03030	2	54	0.761981	0.967922	LOC_Os02g47605|LOC_Os05g15520	osa:4334389|osa:4338202|	4334389|4338202|	http://www.genome.jp/kegg-bin/show_pathway?osa03030/osa:4334389%09red/osa:4338202%09red
Ubiquinone and other terpenoid-quinone biosynthesis	KEGG PATHWAY	osa00130	1	32	0.806184	0.999999	LOC_Os06g44840	osa:4341663|	4341663|	http://www.genome.jp/kegg-bin/show_pathway?osa00130/osa:4341663%09red
alpha-Linolenic acid metabolism	KEGG PATHWAY	osa00592	1	33	0.815603	0.999999	LOC_Os02g10120	osa:4328603|	4328603|	http://www.genome.jp/kegg-bin/show_pathway?osa00592/osa:4328603%09red
Biosynthesis of amino acids	KEGG PATHWAY	osa01230	8	207	0.824358	0.999999	LOC_Os12g07210|LOC_Os06g40640|LOC_Os01g27760|LOC_Os05g35420|LOC_Os06g44460|LOC_Os02g39570|LOC_Os05g41640|LOC_Os06g45710	osa:4349897|osa:4341496|osa:4325444|osa:4347383|osa:4341713|osa:4329938|osa:4341792|osa:4341792|	4349897|4341496|4325444|4347383|4341713|4329938|4341792|4341792|	http://www.genome.jp/kegg-bin/show_pathway?osa01230/osa:4347383%09red/osa:4341496%09red/osa:4325444%09red/osa:4349897%09red/osa:4329938%09red/osa:4341792%09red/osa:4341713%09red
Biosynthesis of unsaturated fatty acids	KEGG PATHWAY	osa01040	1	40	0.869912	0.999999	LOC_Os01g69080	osa:4327738|	4327738|	http://www.genome.jp/kegg-bin/show_pathway?osa01040/osa:4327738%09red
Basal transcription factors	KEGG PATHWAY	osa03022	1	41	0.876239	0.999999	LOC_Os03g14720	osa:4348225|	4348225|	http://www.genome.jp/kegg-bin/show_pathway?osa03022/osa:4348225%09red
Phenylalanine, tyrosine and tryptophan biosynthesis	KEGG PATHWAY	osa00400	1	42	0.882259	0.999999	LOC_Os01g27760	osa:4325444|	4325444|	http://www.genome.jp/kegg-bin/show_pathway?osa00400/osa:4325444%09red
Base excision repair	KEGG PATHWAY	osa03410	1	43	0.887987	0.999999	LOC_Os07g23110	osa:4343013|	4343013|	http://www.genome.jp/kegg-bin/show_pathway?osa03410/osa:4343013%09red
2-Oxocarboxylic acid metabolism	KEGG PATHWAY	osa01210	1	46	0.903556	0.999999	LOC_Os02g39570	osa:4329938|	4329938|	http://www.genome.jp/kegg-bin/show_pathway?osa01210/osa:4329938%09red
Cysteine and methionine metabolism	KEGG PATHWAY	osa00270	2	85	0.928604	0.999999	LOC_Os09g27820|LOC_Os03g56280	osa:4347225|osa:4334274|	4347225|4334274|	http://www.genome.jp/kegg-bin/show_pathway?osa00270/osa:4347225%09red/osa:4334274%09red
Protein export	KEGG PATHWAY	osa03060	1	56	0.941458	0.999999	LOC_Os11g05552	osa:9267495|	9267495|	http://www.genome.jp/kegg-bin/show_pathway?osa03060/osa:9267495%09red
Plant-pathogen interaction	KEGG PATHWAY	osa04626	3	130	0.95958	0.999999	LOC_Os03g55100|LOC_Os02g41710|LOC_Os01g25820	osa:4334172|osa:4330041|osa:4326027|	4334172|4330041|4326027|	http://www.genome.jp/kegg-bin/show_pathway?osa04626/osa:4330041%09red/osa:4334172%09red/osa:4326027%09red
Purine metabolism	KEGG PATHWAY	osa00230	3	135	0.966482	0.999999	LOC_Os10g11140|LOC_Os06g45480|LOC_Os05g28180	osa:4348230|osa:4341777|osa:4344386|	4348230|4341777|4344386|	http://www.genome.jp/kegg-bin/show_pathway?osa00230/osa:4344386%09red/osa:4348230%09red/osa:4341777%09red
mRNA surveillance pathway	KEGG PATHWAY	osa03015	2	107	0.971375	0.999999	LOC_Os01g50730|LOC_Os08g17655	osa:4324242|osa:9268632|	4324242|9268632|	http://www.genome.jp/kegg-bin/show_pathway?osa03015/osa:9268632%09red/osa:4324242%09red
Ubiquitin mediated proteolysis	KEGG PATHWAY	osa04120	2	119	0.982858	0.999999	LOC_Os01g65920|LOC_Os01g63900	osa:4324993|osa:4324761|	4324993|4324761|	http://www.genome.jp/kegg-bin/show_pathway?osa04120/osa:4324993%09red/osa:4324761%09red
Ribosome biogenesis in eukaryotes	KEGG PATHWAY	osa03008	1	90	0.989321	0.999999	LOC_Os02g28074	osa:4329368|	4329368|	http://www.genome.jp/kegg-bin/show_pathway?osa03008/osa:4329368%09red
RNA degradation	KEGG PATHWAY	osa03018	1	92	0.99034	0.999999	LOC_Os02g28074	osa:4329368|	4329368|	http://www.genome.jp/kegg-bin/show_pathway?osa03018/osa:4329368%09red
Pyrimidine metabolism	KEGG PATHWAY	osa00240	1	112	0.996461	0.999999	LOC_Os08g15030	osa:4345071|	4345071|	http://www.genome.jp/kegg-bin/show_pathway?osa00240/osa:4345071%09red
Protein processing in endoplasmic reticulum	KEGG PATHWAY	osa04141	3	203	0.99778	0.999999	LOC_Os03g59264|LOC_Os01g73280|LOC_Os02g03570	osa:4334509|osa:4325451|osa:4328171|	4334509|4325451|4328171|	http://www.genome.jp/kegg-bin/show_pathway?osa04141/osa:4325451%09red/osa:4334509%09red/osa:4328171%09red
RNA transport	KEGG PATHWAY	osa03013	1	151	0.999504	0.999999	LOC_Os07g38660	osa:4343692|	4343692|	http://www.genome.jp/kegg-bin/show_pathway?osa03013/osa:4343692%09red
Ribosome	KEGG PATHWAY	osa03010	2	330	0.999999	0.999999	LOC_Os10g21314|LOC_Os08g15246	osa:3131425|osa:3131444|	3131425|3131444|	http://www.genome.jp/kegg-bin/show_pathway?osa03010/osa:3131425%09red/osa:3131444%09red
