# Supplementary material for: OsLMP1, Encoding a Deubiquitinase, Regulates the Immune Response in Rice
Source: Front Plant Sci. 2022 Jan 18;12:814465. doi: 10.3389/fpls.2021.814465 (PMC8805587; doi:10.3389/fpls.2021.814465)
Supplement: Supplementary Table 4 — Cloned lesion mimic genes in rice. [file Table_4.xls]

## Sheet: Sheet1
NO.	Gene	Encoded protein	Reference
1	EBR1	E3 Ubiquitin ligase	You et al.,2016
2	LIL1	a cysteine-rich receptor-like kinase	Zou et al.,2017
3	LML1	a novel eukaryotic release factor 1 (eRF1) protein	Qin et al.,2018
4	LMR	a AAA ATPase	Zhu et al.,2016
5	LTN1	a Ubiquitin-Conjugating Domain protein	Hu et al.,2011
6	NLS1	CC-NB-LRR-type R gene	Tang et al.,2011
7	NPR1	Ankyrin repeat domain protein	Mawsheng et al.,2005
8	LMM24	Receptor-Like Cytoplasmic Kinase 109	Zhang et al.,2019
9	OsCUL3a	Cullin3-based RING E3 ubiquitin ligasesLiu et al.,2017	Liu et al.,2017
10	OsLSD1	A zinc Finger Protein	Wu et al.,2014
11	OsPti1a	protein kinase	Akira et al.,2007
12	OsPUB15	E3 ubiquitin ligase	Park et al.,2011
13	OsRLR1	CC-NB-LRR	Du et al.,2021
14	OsSEC3a	an subunit of the exocyst complex	Ma et al.,2018
15	RLS1	a ubiquitin-conjugating enzyme E2	Chen et al.,2018
16	RLS3	AAA+ domain protein	Lin et al.,2016
17	SPL1/ELL1	cytochrome P450 monooxygenase	Cui et al.,2021
18	SPL3/OsEDR1/OsACDR1	Mitogen-Activated Protein Kinase Kinase Kinase1 (OsMAPKKK1)	Ma et al.,2015
19	SPL4	microtubule-interacting-and-transport (MIT) spastin protein	Song et al.,2018
20	SPL5	a splicing factor 3b subunit 3	Chen et al.,2012
21	SPL7	a heat stress transcription factor	Yamanouchi et al.,2002
22	SPL11	U-Box E3 ligase	Liu et al.,2012
23	SPL18	Acyltransferase	Mori et al.,2007
24	SPL24	Receptor-Like Cytoplasmic Kinase 109	Chen et al.,2018
25	SPL28	Clathrin-associated adaptor protein	Qiao et al.,2010
26	SPL29	UDP-N-acetylglucosamine pyrophosphorylase	Xiao et al.,2018
27	SPL30	ATP-citrate lyases	Ruan et al.,2019
28	SPL32	Ferredoxin-dependent glutamate synthase	Sun et al.,2017
29	SPL33	eukaryotic translation elongation factor 1 alpha (eEF1A)-like protein	Wang et al.,2017
30	SPL35	a novel CUE domain-containing protein	Ma et al.,2017
31	SPL36	a Receptor-like Protein Kinase	Rao et al.,2021
32	OsHPL3	hydroperoxide lyase	Tong et al.,2012
