# Supplementary material for: OsLMP1, Encoding a Deubiquitinase, Regulates the Immune Response in Rice
Source: Front Plant Sci. 2022 Jan 18;12:814465. doi: 10.3389/fpls.2021.814465 (PMC8805587; doi:10.3389/fpls.2021.814465)
Supplement: Supplementary Table 5 — Fold change in the expression of SA-related genes in the lmp1-1 line vs. the wt line. [file Table_5.xls]

## Sheet: Sheet1
SA	ID	ID	Fold(lmp1-1/Wt)	pval	padj
OsPAL9	Os12g0520200	LOC_Os12g33610	10.8318	0.015588	0.10662
OsPAL1	Os08g0566000	LOC_Os08g45160	1.57609	0.14177	0.46155
OsPAL7	Os05g0427400	LOC_Os05g35290	7.47566	6.65e-07	2.69e-05
OsPAL6	Os04g0518400	LOC_Os04g43800	9.59844	0.00021942	0.0038185
OsPAL5	Os04g0518100	LOC_Os04g43760	1.19463	0.60651	0.96522
OsPAL4	Os02g0627100	LOC_Os02g41680	1.70215	0.30159	0.71032
OsPAL3	Os02g0626600	LOC_Os02g41670	5.63924	0.079379	0.32265
OsPAL2	Os02g0626400	LOC_Os02g41650	1.61413	0.13689	0.45213
OsICS1	Os09g0361500	LOC_Os09g19734	0.89	1	/
